# Supplementary material
Source: publisher figshare collection journal article supplement (https://gsajournals.figshare.com/ndownloader/files/25301621)
Supplement: Supplementary file 1 [file 25301621]

## Sheet: Table S2
Query ORF	Query Name	Array ORF	Array Name	Array annotation	Normalized colony size (EXPERIMENT)	Normalized colony std. dev. (EXPERIMENT)	Normalized colony size (CONTROL)	Normalized colony std. dev. (CONTROL)	Score	Score stdev	p-Value	Additional information
hrq1	hrq1	YHR153C	SPO16		0.37523	0.153	0.86177	0.066	-0.4749	0.153	0.01632
hrq1	hrq1	YMR201C	RAD14		0.34988	0.058	0.75815	0.187	-0.44606	0.058	0.00124
hrq1	hrq1	YHR017W	YSC83		0.65868	0.181	0.90651	0.256	-0.332	0.181	0.00537
hrq1	hrq1	YGL136C	MRM2		0.43874	0.264	0.67553	0.338	-0.31395	0.264	0.0449
hrq1	hrq1	YGR081C	SLX9		0.59353	0.281	0.87752	0.12	-0.30551	0.281	0.02418
hrq1	hrq1	YJL139C	YUR1		0.56944	0.192	0.88215	0.154	-0.28445	0.192	0.00961
hrq1	hrq1	YDR455C	YDR455C		0.41848	0.031	0.68694	0.016	-0.27262	0.031	0.00179	status=JK
hrq1	hrq1	YHL036W	MUP3		0.69023	0.266	0.96471	0.218	-0.2656	0.266	0.01386
hrq1	hrq1	YBR093C	PHO5		0.67348	0.037	0.93612	0.013	-0.26132	0.037	5e-05
hrq1	hrq1	YNL121C	TOM70		0.82587	0.178	1.05724	0.008	-0.22732	0.178	0.00266
hrq1	hrq1	YLR448W	RPL6B		0.5884	0.034	0.77515	0.147	-0.22574	0.034	0.00113	status=JK
hrq1	hrq1	YGL007W	YGL007W		0.61084	0.046	0.83287	0.015	-0.22121	0.046	0.00012
hrq1	hrq1	YER162C	RAD4		0.13277	0.037	0.34829	0.063	-0.20131	0.037	0.02494	status=JK
hrq1	hrq1	YER111C	SWI4		0.77279	0.013	0.96602	0.022	-0.19717	0.013	0
hrq1	hrq1	YGL222C	EDC1		0.53363	0.051	0.69265	0.036	-0.1626	0.051	0.00024
hrq1	hrq1	YJR054W	KCH1		0.46657	0.218	0.68312	0.335	-0.15974	0.218	0.02338
hrq1	hrq1	YPL036W	PMA2		0.75802	0.119	0.8916	0.067	-0.15706	0.118	0.00103
hrq1	hrq1	YGR058W	PEF1		0.82533	0.005	0.98032	0.013	-0.1543	0.005	1e-05	status=JK
hrq1	hrq1	YOR297C	TIM18		0.83271	0.017	0.9854	0.022	-0.1536	0.017	0
hrq1	hrq1	YHR061C	GIC1		0.55439	0.159	0.69956	0.259	-0.15182	0.159	0.00604
hrq1	hrq1	YBR231C	SWC5		0.72555	0.21	0.81035	0.244	-0.1508	0.21	0.0062
hrq1	hrq1	YHR076W	PTC7		0.81803	0.134	0.96109	0.04	-0.14665	0.134	0.00118
hrq1	hrq1	YIL040W	APQ12		0.28791	0.032	0.43455	0.071	-0.14617	0.032	0.00411	status=JK
hrq1	hrq1	YOL081W	IRA2		0.78322	0.066	0.92494	0.019	-0.14316	0.066	0.00017
hrq1	hrq1	YGL180W	ATG1		0.77213	0.051	0.91479	0.002	-0.14291	0.051	8e-05
hrq1	hrq1	YGL237C	HAP2		0.537	0.195	0.6971	0.042	-0.1423	0.195	0.01174
hrq1	hrq1	YPR024W	YME1		0.71408	0.03	0.85445	0.012	-0.14168	0.03	2e-05
hrq1	hrq1	YGR173W	RBG2		0.58279	0.089	0.72294	0.014	-0.13692	0.089	0.00097
hrq1	hrq1	YDR057W	YOS9		0.8564	0.002	0.98265	0.055	-0.13057	0.002	0	status=JK
hrq1	hrq1	YNR018W	RCF2		0.51623	0.05	0.64549	0.055	-0.13041	0.05	0.00026
hrq1	hrq1	YOR017W	PET127		0.54414	0.041	0.67258	0.019	-0.13002	0.041	0.00012
hrq1	hrq1	YKR042W	UTH1		0.86159	0.047	0.9757	0.027	-0.12649	0.047	0.001	status=JK
hrq1	hrq1	YGL212W	VAM7		0.37447	0.087	0.49871	0.143	-0.12614	0.087	0.00327
hrq1	hrq1	YDL161W	ENT1		0.84594	0.048	0.9695	0.021	-0.12419	0.048	5e-05
hrq1	hrq1	YGR231C	PHB2		0.81479	0.028	0.94228	0.019	-0.12183	0.028	1e-05
hrq1	hrq1	YDR174W	HMO1		0.23939	0.019	0.36672	0.023	-0.12129	0.019	0.00015
hrq1	hrq1	YPR050C	YPR050C		0.88767	0.024	1.01021	0.037	-0.12113	0.024	0.00025	status=JK
hrq1	hrq1	YOL124C	TRM11		0.85632	0.002	0.97264	0.022	-0.11928	0.002	0	status=JK
hrq1	hrq1	YGR097W	ASK10		0.73625	0.068	0.83167	0.259	-0.11741	0.068	0.00281	status=JK
hrq1	hrq1	YHR154W	RTT107		0.83415	0.076	0.957	0.028	-0.11656	0.076	0.00021
hrq1	hrq1	YGL227W	VID30		0.61141	0.09	0.71643	0.058	-0.11326	0.09	0.00087
hrq1	hrq1	YJL183W	MNN11		0.90248	0.136	1.01649	0.043	-0.11243	0.136	0.00093
hrq1	hrq1	YKL053C-A	MDM35		0.6997	0.039	0.80065	0.045	-0.11228	0.039	0.00104	status=JK
hrq1	hrq1	YBR213W	MET8		0.89447	0.027	0.99874	0.055	-0.11088	0.027	0.0003	status=JK
hrq1	hrq1	YDL122W	UBP1		0.91413	0.12	1.01636	0.039	-0.10786	0.12	0.00061
hrq1	hrq1	YPR084W	YPR084W		0.88211	0.003	0.98533	0.007	-0.10366	0.003	0	status=JK
hrq1	hrq1	YHR041C	SRB2		0.71856	0.041	0.82398	0.012	-0.10296	0.041	5e-05
hrq1	hrq1	YBR026C	ETR1		0.49782	0.065	0.59269	0.015	-0.10265	0.065	0.00061
hrq1	hrq1	YLL045C	RPL8B		0.54339	0.081	0.64567	0.042	-0.10136	0.081	0.0009
hrq1	hrq1	YML011C	RAD33		0.87858	0.097	0.96117	0.039	-0.10101	0.097	0.00037
hrq1	hrq1	YOL004W	SIN3		0.76476	0.041	0.85945	0.035	-0.10043	0.041	4e-05
hrq1	hrq1	YNL117W	MLS1		0.72701	0.019	0.82755	0.056	-0.09864	0.019	0.00023	status=JK
hrq1	hrq1	YKR101W	SIR1		0.78278	0.147	0.88216	0.004	-0.09724	0.147	0.00177
hrq1	hrq1	YPL172C	COX10		0.85644	0.003	0.95684	0.018	-0.09722	0.003	0	status=JK
hrq1	hrq1	YGL066W	SGF73		0.66439	0.032	0.76047	0.009	-0.09603	0.032	3e-05
hrq1	hrq1	YBL011W	SCT1		0.83525	0.01	0.93212	0.013	-0.0955	0.01	5e-05	status=JK
hrq1	hrq1	YKL055C	OAR1		0.63692	0.017	0.73144	0.008	-0.09521	0.017	0
hrq1	hrq1	YOL037C	YOL037C		0.74755	0.073	0.82787	0.032	-0.09452	0.073	0.00025
hrq1	hrq1	YHR067W	HTD2		0.58959	0.035	0.68745	0.033	-0.09366	0.035	6e-05
hrq1	hrq1	YGL114W	YGL114W		0.57751	0.034	0.67289	0.015	-0.093	0.034	6e-05
hrq1	hrq1	YLR111W	YLR111W		0.75149	0.098	0.8576	0.077	-0.09252	0.098	0.0006
hrq1	hrq1	YNL077W	APJ1		1.00236	0.046	1.0751	0.145	-0.09162	0.046	3e-05
hrq1	hrq1	YPR191W	QCR2		0.82889	0.002	0.91671	0.054	-0.09153	0.002	0	status=JK
hrq1	hrq1	YDR392W	SPT3		0.85846	0.006	0.95013	0.017	-0.09022	0.006	1e-05	status=JK
hrq1	hrq1	YPL181W	CTI6		0.98906	0.044	1.0759	0.014	-0.08882	0.044	2e-05
hrq1	hrq1	YDR019C	GCV1		0.95144	0.191	1.02838	0.054	-0.08657	0.191	0.00217
hrq1	hrq1	YLR193C	UPS1		0.84345	0.036	0.92656	0.035	-0.08606	0.036	2e-05
hrq1	hrq1	YJR094W-A	RPL43B		0.82613	0.187	0.91681	0.048	-0.08478	0.187	0.00306
hrq1	hrq1	YML032C	RAD52		0.72993	0.016	0.81401	0.006	-0.0847	0.016	0
hrq1	hrq1	YOR093C	YOR093C		0.63891	0.022	0.72307	0.005	-0.0829	0.022	1e-05
hrq1	hrq1	YDR161W	YDR161W		0.7985	0.091	0.88415	0.008	-0.08254	0.091	0.0004
hrq1	hrq1	YNR025C	YNR025C		0.92337	0.052	1.00133	0.03	-0.08125	0.052	5e-05
hrq1	hrq1	YLR199C	PBA1		1.03455	0.008	1.11136	0.033	-0.08121	0.008	2e-05	status=JK
hrq1	hrq1	YBL015W	ACH1		1.00472	0.009	1.07324	0.042	-0.08096	0.009	3e-05	status=JK
hrq1	hrq1	YFL010W-A	AUA1		0.91614	0.057	0.99068	0.024	-0.08095	0.057	7e-05
hrq1	hrq1	YLR394W	CST9		1.04678	0.056	1.1199	0.019	-0.08018	0.056	4e-05
hrq1	hrq1	YIR033W	MGA2		0.9691	0.021	0.89153	0.018	0.08104	0.021	0
hrq1	hrq1	YPL048W	CAM1		0.63921	0.038	0.54744	0.037	0.08203	0.038	6e-05
hrq1	hrq1	YNR029C	YNR029C		0.99457	0.004	0.91483	0.009	0.08347	0.004	0	status=JK
hrq1	hrq1	YDL232W	OST4		0.77879	0.023	0.68943	0.051	0.08527	0.023	0.00028	status=JK
hrq1	hrq1	YGR118W	RPS23A		0.88144	0.022	0.80285	0.033	0.08537	0.022	0
hrq1	hrq1	YLR388W	RPS29A		0.91091	0.034	0.82435	0.026	0.08692	0.034	1e-05
hrq1	hrq1	YDL081C	RPP1A		0.81559	0.06	0.73032	0.012	0.08755	0.06	0.00011
hrq1	hrq1	YLR065C	ENV10		0.9266	0.024	0.83709	0.018	0.08776	0.024	0
hrq1	hrq1	YJR073C	OPI3		0.68063	0.016	0.58646	0.027	0.08895	0.016	0
hrq1	hrq1	YKL006W	RPL14A		0.92062	0.008	0.83131	0.002	0.08955	0.008	2e-05	status=JK
hrq1	hrq1	YGR101W	PCP1		0.87017	0.011	0.77729	0.017	0.0904	0.011	0
hrq1	hrq1	YDL155W	CLB3		1.11323	0.077	1.02121	0.004	0.09193	0.077	9e-05
hrq1	hrq1	YDL013W	SLX5		0.62057	0.017	0.52182	0.047	0.09202	0.017	1e-05
hrq1	hrq1	YPL239W	YAR1		0.77672	0.051	0.68632	0.048	0.09474	0.051	8e-05
hrq1	hrq1	YPL180W	TCO89		0.62187	0.031	0.51673	0.017	0.09571	0.031	3e-05
hrq1	hrq1	YLR357W	RSC2		0.66129	0.016	0.56851	0.022	0.09606	0.016	0
hrq1	hrq1	YOR106W	VAM3		0.77729	0.072	0.67378	0.063	0.09666	0.072	0.00022
hrq1	hrq1	YML038C	YMD8		0.86962	0.012	0.76876	0.012	0.09716	0.012	0
hrq1	hrq1	YCR086W	CSM1		0.99328	0.006	0.89412	0.007	0.09921	0.006	1e-05	status=JK
hrq1	hrq1	YBL087C	RPL23A		0.94609	0.063	0.82813	0.052	0.10148	0.063	8e-05
hrq1	hrq1	YGR077C	PEX8		1.00757	0.025	0.89628	0.043	0.10177	0.025	0
hrq1	hrq1	YGL149W	YGL149W		0.99381	0.012	0.89315	0.013	0.10269	0.012	0
hrq1	hrq1	YNL080C	EOS1		0.69847	0.01	0.59248	0.03	0.10653	0.01	7e-05	status=JK
hrq1	hrq1	YER116C	SLX8		0.8444	0.038	0.73044	0.053	0.10742	0.038	3e-05
hrq1	hrq1	YLR089C	ALT1		0.76574	0.002	0.66122	0.016	0.10812	0.002	0	status=JK
hrq1	hrq1	YMR204C	INP1		0.91733	0.123	0.82262	0.105	0.10937	0.123	0.00066
hrq1	hrq1	YJR118C	ILM1		0.72639	0.04	0.60784	0.04	0.11824	0.04	4e-05
hrq1	hrq1	YMR026C	PEX12		1.08637	0.015	0.9434	0.064	0.12487	0.015	7e-05	status=JK
hrq1	hrq1	YDL035C	GPR1		1.0737	0.033	0.96042	0.093	0.12563	0.033	0.00031	status=JK
hrq1	hrq1	YGL105W	ARC1		0.17783	0.034	0.00849	0.015	0.17777	0.034	0.01218	status=JK
hrq1	hrq1	YIL090W	ICE2		0.68586	0.038	0.51403	0.034	0.18013	0.038	5e-05
hrq1	hrq1	YOR245C	DGA1		0.65576	0.055	0.49254	0.087	0.18345	0.055	0.00016
hrq1	hrq1	YBL021C	HAP3		1.01865	0.156	0.74417	0.325	0.18442	0.155	0.00096
hrq1	hrq1	YGL024W	YGL024W		0.59989	0.005	0.40269	0.053	0.18825	0.005	2e-05	status=JK
hrq1	hrq1	YBR189W	RPS9B		0.47717	0.05	0.27881	0.008	0.19557	0.05	0.00361	status=JK
hrq1	hrq1	YOR300W	YOR300W		0.64035	0.027	0.44962	0.042	0.1992	0.027	2e-05
hrq1	hrq1	YJR077C	MIR1		0.64982	0.282	0.44333	0.09	0.24043	0.281	0.01913
hrq1	hrq1	YGL214W	YGL214W		0.44324	0.26	0.17624	0.039	0.24792	0.26	0.04216
hrq1	hrq1	YNL072W	RNH201		0.5917	0.338	0.28165	0.218	0.27778	0.338	0.03952
hrq1	hrq1	YKL204W	EAP1		0.44638	0.189	0.17574	0.038	0.28009	0.189	0.01809
hrq1	hrq1	YBL031W	SHE1		0.63438	0.212	0.27254	0.09	0.35657	0.212	0.00932

## Sheet: Table S3
Query ORF	Query Name	Array ORF	Array Name	Array annotation	Normalized colony size (EXPERIMENT)	Normalized colony std. dev. (EXPERIMENT)	Normalized colony size (CONTROL)	Normalized colony std. dev. (CONTROL)	Score	Score stdev	p-Value	Additional information
hrq1	hrq1	YBL021C	HAP3		0.36472	0.158	0.74417	0.325	-0.46902	0.158	0.01923
hrq1	hrq1	YPL180W	TCO89		0.13001	0.021	0.51673	0.017	-0.39606	0.021	0.00109
hrq1	hrq1	YDR080W	VPS41		0.24443	0.056	0.53038	0.179	-0.34279	0.056	0.01689	status=JK
hrq1	hrq1	YGL237C	HAP2		0.34591	0.043	0.6971	0.042	-0.33332	0.043	0.00505	status=JK
hrq1	hrq1	YMR201C	RAD14		0.46363	0.244	0.75815	0.187	-0.33274	0.244	0.03202
hrq1	hrq1	YPL178W	CBC2		0.23138	0.101	0.50769	0.252	-0.2904	0.101	0.01943
hrq1	hrq1	YNL121C	TOM70		0.76319	0.184	1.05724	0.008	-0.28987	0.184	0.00366
hrq1	hrq1	YBR093C	PHO5		0.68108	0.099	0.93612	0.013	-0.25345	0.098	0.00082
hrq1	hrq1	YMR245W	YMR245W		0.81071	0.145	1.06646	0.009	-0.25248	0.145	0.00154
hrq1	hrq1	YJR094W-A	RPL43B		0.65903	0.353	0.91681	0.048	-0.25158	0.352	0.03336
hrq1	hrq1	YBR231C	SWC5		0.62475	0.072	0.81035	0.244	-0.25103	0.072	0.00441	status=JK
hrq1	hrq1	YKR042W	UTH1		0.74442	0.302	0.9757	0.027	-0.2438	0.301	0.01593
hrq1	hrq1	YJR003C	YJR003C		0.69222	0.262	0.919	0.035	-0.2412	0.261	0.01316
hrq1	hrq1	YDL035C	GPR1		0.71039	0.344	0.96042	0.093	-0.23697	0.344	0.02579
hrq1	hrq1	YBL027W	RPL19B		0.5904	0.16	0.82246	0.009	-0.22986	0.16	0.00512
hrq1	hrq1	YPR024W	YME1		0.63105	0.045	0.85445	0.012	-0.22417	0.045	0.0001
hrq1	hrq1	YOL085C	YOL085C		0.78557	0.137	0.97882	0.044	-0.19592	0.137	0.00143
hrq1	hrq1	YLR055C	SPT8		0.76445	0.061	0.9533	0.03	-0.19473	0.061	0.00014
hrq1	hrq1	YPL069C	BTS1		0.34828	0.018	0.53706	0.018	-0.18685	0.018	4e-05
hrq1	hrq1	YLR225C	YLR225C		0.76258	0.15	0.93219	0.041	-0.17984	0.15	0.00204
hrq1	hrq1	YNL117W	MLS1		0.65763	0.092	0.82755	0.056	-0.16791	0.092	0.00075
hrq1	hrq1	YER111C	SWI4		0.80345	0.033	0.96602	0.022	-0.16602	0.033	2e-05
hrq1	hrq1	YLR111W	YLR111W		0.68244	0.052	0.8576	0.077	-0.16224	0.052	0.00192	status=JK
hrq1	hrq1	YFL010W-A	AUA1		0.83551	0.02	0.99068	0.024	-0.16095	0.02	0
hrq1	hrq1	YLR180W	SAM1		0.77114	0.245	0.90647	0.064	-0.15461	0.245	0.00806
hrq1	hrq1	YPL036W	PMA2		0.77112	0.085	0.8916	0.067	-0.14415	0.085	0.00037
hrq1	hrq1	YLL051C	FRE6		0.76776	0.18	0.91229	0.064	-0.14405	0.18	0.00337
hrq1	hrq1	YJR084W	YJR084W		0.84891	0.316	0.98218	0.024	-0.13533	0.316	0.01267
hrq1	hrq1	YHR067W	HTD2		0.54813	0.028	0.68745	0.033	-0.13526	0.028	4e-05
hrq1	hrq1	YNL072W	RNH201		0.18051	0.006	0.28165	0.218	-0.13323	0.006	0.00035	status=JK
hrq1	hrq1	YKL053C-A	MDM35		0.68248	0.058	0.80065	0.045	-0.12966	0.058	0.00239	status=JK
hrq1	hrq1	YOR017W	PET127		0.54535	0.073	0.67258	0.019	-0.12944	0.073	0.00065
hrq1	hrq1	YLR418C	CDC73		0.76403	0.069	0.89209	0.001	-0.12787	0.069	0.0002
hrq1	hrq1	YLR346C	YLR346C		0.9219	0.11	1.03821	0.026	-0.12091	0.11	0.00046
hrq1	hrq1	YOL012C	HTZ1		0.79195	0.025	0.91475	0.013	-0.12056	0.025	1e-05
hrq1	hrq1	YKL056C	TMA19		0.8154	0.031	0.93175	0.028	-0.12039	0.031	0.00049	status=JK
hrq1	hrq1	YKR016W	FCJ1		0.82707	0.15	0.94959	0.049	-0.11946	0.15	0.00158
hrq1	hrq1	YOL004W	SIN3		0.74689	0.008	0.85945	0.035	-0.11911	0.008	4e-05	status=JK
hrq1	hrq1	YAL024C	LTE1		0.87753	0.091	0.99282	0.01	-0.11762	0.091	0.0003
hrq1	hrq1	YLR448W	RPL6B		0.69833	0.425	0.77515	0.147	-0.11627	0.425	0.04617
hrq1	hrq1	YDL070W	BDF2		0.88873	0.097	0.99617	0.031	-0.1157	0.097	0.00035
hrq1	hrq1	YJR120W	YJR120W		0.84198	0.169	0.96189	0.025	-0.1157	0.169	0.00216
hrq1	hrq1	YJL183W	MNN11		0.89956	0.04	1.01649	0.043	-0.11509	0.04	2e-05
hrq1	hrq1	YPR045C	THP3		0.49391	0.028	0.59697	0.055	-0.11385	0.028	5e-05
hrq1	hrq1	YPR191W	QCR2		0.80605	0.033	0.91671	0.054	-0.11381	0.033	2e-05
hrq1	hrq1	YJR125C	ENT3		0.9076	0.143	1.01557	0.039	-0.11348	0.142	0.00104
hrq1	hrq1	YNL077W	APJ1		0.98254	0.148	1.0751	0.145	-0.11132	0.148	0.00093
hrq1	hrq1	YPR084W	YPR084W		0.87413	0.03	0.98533	0.007	-0.11106	0.03	1e-05
hrq1	hrq1	YGL066W	SGF73		0.64994	0.014	0.76047	0.009	-0.1105	0.014	0
hrq1	hrq1	YPL182C	YPL182C		0.98208	0.022	1.09479	0.02	-0.10874	0.022	0
hrq1	hrq1	YNR006W	VPS27		0.74598	0.056	0.84983	0.01	-0.10828	0.056	0.00011
hrq1	hrq1	YOR196C	LIP5		0.65362	0.033	0.76906	0.03	-0.10825	0.033	3e-05
hrq1	hrq1	YGL007W	YGL007W		0.72402	0.007	0.83287	0.015	-0.10809	0.007	0
hrq1	hrq1	YOR082C	YOR082C		0.82574	0.105	0.93215	0.034	-0.10785	0.105	0.00056
hrq1	hrq1	YCR071C	IMG2		0.6421	0.046	0.75237	0.006	-0.10784	0.046	0.0001
hrq1	hrq1	YJL175W	YJL175W		0.5996	0.01	0.70715	0.001	-0.10727	0.01	0
hrq1	hrq1	YOR297C	TIM18		0.8809	0.03	0.9854	0.022	-0.10562	0.03	1e-05
hrq1	hrq1	YDL006W	PTC1		0.69702	0.109	0.79719	0.026	-0.10439	0.109	0.00102
hrq1	hrq1	YLL025W	PAU17		0.90257	0.067	0.99548	0.038	-0.10269	0.067	0.00011
hrq1	hrq1	YDL122W	UBP1		0.91996	0.095	1.01636	0.039	-0.10141	0.095	0.0003
hrq1	hrq1	YPL157W	TGS1		0.84506	0.052	0.93568	0.03	-0.10122	0.052	6e-05
hrq1	hrq1	YGR058W	PEF1		0.8799	0.003	0.98032	0.013	-0.09977	0.003	0	status=JK
hrq1	hrq1	YGR231C	PHB2		0.83744	0.035	0.94228	0.019	-0.09941	0.035	2e-05
hrq1	hrq1	YMR060C	SAM37		0.92256	0.007	1.01676	0.016	-0.09937	0.007	2e-05	status=JK
hrq1	hrq1	YOR317W	FAA1		0.97227	0.012	1.07383	0.021	-0.09848	0.012	5e-05	status=JK
hrq1	hrq1	YLR193C	UPS1		0.83321	0.041	0.92656	0.035	-0.09706	0.041	3e-05
hrq1	hrq1	YOR078W	BUD21		0.40243	0.018	0.49364	0.021	-0.09674	0.018	0.00067	status=JK
hrq1	hrq1	YHL036W	MUP3		0.86596	0.133	0.96471	0.218	-0.09016	0.133	0.00097
hrq1	hrq1	YLR079W	SIC1		0.56813	0.031	0.66348	0.039	-0.08889	0.031	4e-05
hrq1	hrq1	YML008C	ERG6		0.91097	0.066	0.99753	0.004	-0.08869	0.066	0.00011
hrq1	hrq1	YDR174W	HMO1		0.2721	0.012	0.36672	0.023	-0.08855	0.012	2e-05
hrq1	hrq1	YDL059C	RAD59		0.98215	0.037	1.07022	0.005	-0.08821	0.037	1e-05
hrq1	hrq1	YDR503C	LPP1		0.9407	0.119	1.03816	0.018	-0.08752	0.119	0.00056
hrq1	hrq1	YPL181W	CTI6		0.99072	0.013	1.0759	0.014	-0.08738	0.013	0
hrq1	hrq1	YNR010W	CSE2		0.69949	0.03	0.7867	0.028	-0.08648	0.03	0.00063	status=JK
hrq1	hrq1	YNR007C	ATG3		0.91093	0.002	1.00064	0.007	-0.08637	0.002	0	status=JK
hrq1	hrq1	YPR050C	YPR050C		0.92257	0.048	1.01021	0.037	-0.08565	0.048	0.00091	status=JK
hrq1	hrq1	YOR221C	MCT1		0.55423	0.08	0.63089	0.043	-0.08452	0.08	0.00082
hrq1	hrq1	YMR291W	TDA1		1.00027	0.03	1.07597	0.048	-0.08445	0.03	1e-05
hrq1	hrq1	YGR168C	YGR168C		0.92986	0.136	1.01707	0.024	-0.08353	0.136	0.00084
hrq1	hrq1	YKR065C	PAM17		0.8655	0.139	0.94933	0.037	-0.08345	0.139	0.00112
hrq1	hrq1	YNR025C	YNR025C		0.92241	0.008	1.00133	0.03	-0.08315	0.008	2e-05	status=JK
hrq1	hrq1	YLR062C	YLR062C		0.82466	0.043	0.91203	0.013	-0.08157	0.043	4e-05
hrq1	hrq1	YPR197C	YPR197C		0.96938	0.067	1.03969	0.029	-0.08045	0.067	9e-05
hrq1	hrq1	YDL013W	SLX5		0.60811	0.007	0.52182	0.047	0.0801	0.007	4e-05	status=JK
hrq1	hrq1	YBR181C	RPS6B		0.79121	0.019	0.71255	0.021	0.08054	0.019	0
hrq1	hrq1	YMR163C	INP2		1.01381	0.023	0.93366	0.01	0.08123	0.023	0
hrq1	hrq1	YKL197C	PEX1		1.00319	0.034	0.92517	0.022	0.08274	0.034	1e-05
hrq1	hrq1	YGR157W	CHO2		0.68238	0.043	0.60282	0.036	0.08286	0.043	7e-05
hrq1	hrq1	YBL088C	TEL1		0.9644	0.042	0.8873	0.034	0.08313	0.042	2e-05
hrq1	hrq1	YMR038C	CCS1		0.18419	0.056	0.09934	0.002	0.0837	0.056	0.00709
hrq1	hrq1	YMR136W	GAT2		1.08214	0.054	1.00492	0.021	0.08396	0.054	3e-05
hrq1	hrq1	YKL032C	IXR1		0.82876	0.037	0.74223	0.007	0.08421	0.037	3e-05
hrq1	hrq1	YGL149W	YGL149W		0.97724	0.025	0.89315	0.013	0.08609	0.025	0
hrq1	hrq1	YKL093W	MBR1		0.98996	0.171	0.89456	0.264	0.08612	0.171	0.00138
hrq1	hrq1	YFR047C	BNA6		0.75895	0.027	0.67109	0.018	0.08643	0.027	1e-05
hrq1	hrq1	YIL123W	SIM1		1.06442	0.02	0.97758	0.008	0.08829	0.02	0
hrq1	hrq1	YMR041C	ARA2		0.63943	0.08	0.57597	0.098	0.08843	0.08	0.00053
hrq1	hrq1	YNL080C	EOS1		0.68115	0.034	0.59248	0.03	0.08926	0.034	3e-05
hrq1	hrq1	YOR245C	DGA1		0.56308	0.098	0.49254	0.087	0.0907	0.098	0.00141
hrq1	hrq1	YBL094C	YBL094C		1.01285	0.017	0.89956	0.089	0.09241	0.017	9e-05	status=JK
hrq1	hrq1	YJR118C	ILM1		0.70677	0.003	0.60784	0.04	0.09849	0.003	1e-05	status=JK
hrq1	hrq1	YMR294W-A	YMR294W-A		0.69708	0.019	0.61416	0.068	0.10214	0.019	1e-05
hrq1	hrq1	YMR011W	HXT2		0.59475	0.039	0.49131	0.003	0.10368	0.039	8e-05
hrq1	hrq1	YLR337C	VRP1		0.85114	0.056	0.74866	0.015	0.1045	0.056	8e-05
hrq1	hrq1	YKR059W	TIF1		0.926	0.021	0.81644	0.027	0.10522	0.021	0
hrq1	hrq1	YGL214W	YGL214W		0.3012	0.109	0.17624	0.039	0.10591	0.109	0.01176
hrq1	hrq1	YDR513W	GRX2		0.78789	0.119	0.68918	0.071	0.10832	0.119	0.00092
hrq1	hrq1	YDL062W	YDL062W		0.9891	0.068	0.88076	0.019	0.10865	0.068	9e-05
hrq1	hrq1	YPR173C	VPS4		0.8076	0.023	0.68918	0.039	0.11084	0.023	1e-05
hrq1	hrq1	YMR065W	KAR5		0.68439	0.049	0.56917	0.039	0.11136	0.049	0.0001
hrq1	hrq1	YMR026C	PEX12		1.0744	0.065	0.9434	0.064	0.11238	0.065	6e-05
hrq1	hrq1	YGL248W	PDE1		0.92598	0.013	0.82102	0.12	0.11416	0.013	7e-05	status=JK
hrq1	hrq1	YPL048W	CAM1		0.67552	0.011	0.54744	0.037	0.1182	0.011	9e-05	status=JK
hrq1	hrq1	YGR237C	YGR237C		0.56904	0.024	0.44369	0.027	0.12348	0.024	2e-05
hrq1	hrq1	YOR300W	YOR300W		0.56799	0.038	0.44962	0.042	0.12676	0.038	8e-05
hrq1	hrq1	YKL212W	SAC1		0.54192	0.056	0.41571	0.014	0.12833	0.056	0.00356	status=JK
hrq1	hrq1	YKR097W	PCK1		1.13182	0.036	0.99216	0.058	0.13249	0.036	0.00033	status=JK
hrq1	hrq1	YJL206C-A	YJL206C-A		0.62536	0.072	0.4858	0.03	0.13751	0.072	0.00042
hrq1	hrq1	YCR086W	CSM1		1.03229	0.021	0.89412	0.007	0.13873	0.021	0
hrq1	hrq1	YML062C	MFT1		0.67323	0.008	0.53593	0.017	0.14047	0.008	5e-05	status=JK
hrq1	hrq1	YGL059W	PKP2		0.97313	0.052	0.83939	0.037	0.14164	0.052	4e-05
hrq1	hrq1	YHL029C	OCA5		0.81832	0.268	0.66527	0.22	0.14861	0.268	0.00887
hrq1	hrq1	YML102W	CAC2		0.9979	0.012	0.85689	0.044	0.15126	0.012	0
hrq1	hrq1	YGL160W	AIM14		0.74385	0.043	0.56739	0.082	0.15824	0.043	0.00109	status=JK
hrq1	hrq1	YIL090W	ICE2		0.71283	0.142	0.51403	0.034	0.2072	0.142	0.0021
hrq1	hrq1	YBR189W	RPS9B		0.49601	0.092	0.27881	0.008	0.21446	0.092	0.00169
hrq1	hrq1	YGL212W	VAM7		0.72583	0.186	0.49871	0.143	0.22507	0.186	0.00435
hrq1	hrq1	YBL031W	SHE1		0.50549	0.312	0.27254	0.09	0.22777	0.312	0.04801
hrq1	hrq1	YGL136C	MRM2		1.16683	0.06	0.67553	0.338	0.41383	0.06	0.00087	status=JK
hrq1	hrq1	YKL204W	EAP1		0.6851	0.379	0.17574	0.038	0.51865	0.379	0.03636
hrq1	hrq1	YOR141C	ARP8		1.24	0.141	0.55743	0.547	0.73575	0.141	0.0043	status=JK

## Sheet: Table S4
Query ORF	Query Name	Array ORF	Array Name	Array annotation	Normalized colony size (EXPERIMENT)	Normalized colony std. dev. (EXPERIMENT)	Normalized colony size (CONTROL)	Normalized colony std. dev. (CONTROL)	Score	Score stdev	p-Value	Additional information
sgs1	sgs1	YBR099C	YBR099C		0.34581	0.038	0.98306	0.012	-0.64395	0.038	0.00038
sgs1	sgs1	YBR094W	PBY1		0.39114	0.016	1.01276	0.036	-0.6283	0.016	2e-05
sgs1	sgs1	YBR100W	YBR100W		0.34189	0.029	0.95677	0.026	-0.61641	0.029	0.00017
sgs1	sgs1	YHR031C	RRM3		0.34594	0.053	0.934	0.007	-0.59186	0.053	0.00098
sgs1	sgs1	YLR135W	SLX4		0.40377	0.004	0.98292	0.006	-0.57766	0.004	4e-05	status=JK
sgs1	sgs1	YBR098W	MMS4		0.52089	0.038	1.04671	0.021	-0.52623	0.037	0.0001
sgs1	sgs1	YJL092W	SRS2		0.51166	0.043	0.98216	0.013	-0.47223	0.043	0.00016
sgs1	sgs1	YGR081C	SLX9		0.42789	0.207	0.87752	0.12	-0.47079	0.207	0.02577
sgs1	sgs1	YHR134W	WSS1		0.44842	0.047	0.9097	0.005	-0.45957	0.047	0.00032
sgs1	sgs1	YBR228W	SLX1		0.6124	0.014	1.04293	0.004	-0.4294	0.014	0
sgs1	sgs1	YBR231C	SWC5		0.45555	0.165	0.81035	0.244	-0.42068	0.165	0.01171
sgs1	sgs1	YDR386W	MUS81		0.57129	0.023	0.96756	0.016	-0.39949	0.023	2e-05
sgs1	sgs1	YGL175C	SAE2		0.60615	0.012	0.98432	0.02	-0.38049	0.012	0
sgs1	sgs1	YHR153C	SPO16		0.47063	0.075	0.86177	0.066	-0.37928	0.075	0.00827	status=JK
sgs1	sgs1	YER116C	SLX8		0.36471	0.017	0.73044	0.053	-0.37236	0.017	0.00073	status=JK
sgs1	sgs1	YOR144C	ELG1		0.62613	0.059	0.98832	0.003	-0.36082	0.058	0.00022
sgs1	sgs1	YHR017W	YSC83		0.62968	0.145	0.90651	0.256	-0.36071	0.145	0.00319
sgs1	sgs1	YOR080W	DIA2		0.23045	0.006	0.59139	0.044	-0.35688	0.006	0.00021	status=JK
sgs1	sgs1	YJR043C	POL32		0.6293	0.022	0.97812	0.014	-0.34767	0.022	1e-05
sgs1	sgs1	YKL094W	YJU3		0.66592	0.385	0.97906	0.091	-0.34097	0.385	0.04074
sgs1	sgs1	YOR141C	ARP8		0.16437	0.082	0.55743	0.547	-0.33885	0.082	0.02786
sgs1	sgs1	YGL136C	MRM2		0.41525	0.083	0.67553	0.338	-0.33718	0.083	0.00215
sgs1	sgs1	YLR154C	RNH203		0.659	0.044	0.99788	0.013	-0.33633	0.044	8e-05
sgs1	sgs1	YDR279W	RNH202		0.66772	0.01	0.99318	0.003	-0.32427	0.01	0
sgs1	sgs1	YER111C	SWI4		0.65676	0.008	0.96602	0.022	-0.31352	0.008	5e-05	status=JK
sgs1	sgs1	YDL013W	SLX5		0.22087	0.021	0.52182	0.047	-0.30752	0.021	0.00023
sgs1	sgs1	YJL139C	YUR1		0.54921	0.064	0.88215	0.154	-0.30408	0.064	0.00454	status=JK
sgs1	sgs1	YJL187C	SWE1		0.52122	0.184	0.81757	0.034	-0.29548	0.184	0.01097
sgs1	sgs1	YCL061C	MRC1		0.66738	0.024	0.95883	0.019	-0.29375	0.024	1e-05
sgs1	sgs1	YNL121C	TOM70		0.75065	0.099	1.04394	0.008	-0.29091	0.099	0.00063
sgs1	sgs1	YHR154W	RTT107		0.66168	0.12	0.957	0.028	-0.2887	0.12	0.0016
sgs1	sgs1	YNL143C	YNL143C		0.75067	0.062	1.02304	0.026	-0.27396	0.062	0.00015
sgs1	sgs1	YGR097W	ASK10		0.58976	0.132	0.83167	0.259	-0.26358	0.132	0.00298
sgs1	sgs1	YCL060C	YCL060C		0.73005	0.033	0.97146	0.019	-0.24793	0.033	2e-05
sgs1	sgs1	YFL010C	WWM1		0.16843	0.061	0.42662	0.216	-0.24572	0.061	0.04093	status=JK
sgs1	sgs1	YPL022W	RAD1		0.66872	0.018	0.90348	0.031	-0.23779	0.018	0.00024	status=JK
sgs1	sgs1	YOL006C	TOP1		0.59744	0.081	0.83074	0.02	-0.23726	0.081	0.00068
sgs1	sgs1	YHL036W	MUP3		0.72371	0.231	0.96471	0.218	-0.23187	0.231	0.00823
sgs1	sgs1	YDR363W	ESC2		0.72438	0.008	0.95205	0.008	-0.22647	0.008	4e-05	status=JK
sgs1	sgs1	YKR042W	UTH1		0.7622	0.269	0.9757	0.027	-0.22638	0.268	0.01083
sgs1	sgs1	YOR025W	HST3		0.77692	0.032	1.00455	0.025	-0.22493	0.032	2e-05
sgs1	sgs1	YDL162C	YDL162C		0.74735	0.043	0.97106	0.003	-0.22264	0.043	5e-05
sgs1	sgs1	YKL113C	RAD27		0.6383	0.031	0.8425	0.025	-0.20908	0.031	3e-05
sgs1	sgs1	YLR418C	CDC73		0.68834	0.044	0.89493	0.005	-0.20689	0.044	7e-05
sgs1	sgs1	YDL185W	VMA1		0.84616	0.055	1.05663	0.022	-0.20458	0.055	8e-05
sgs1	sgs1	YMR300C	ADE4		0.89554	0.033	1.10606	0.041	-0.20314	0.033	1e-05
sgs1	sgs1	YMR048W	CSM3		0.77683	0.055	0.96881	0.018	-0.19676	0.055	0.0001
sgs1	sgs1	YJR094W-A	RPL43B		0.71674	0.172	0.91681	0.048	-0.19351	0.172	0.00361
sgs1	sgs1	YPL036W	PMA2		0.72046	0.042	0.8916	0.067	-0.19346	0.042	5e-05
sgs1	sgs1	YML028W	TSA1		0.74055	0.023	0.93757	0.02	-0.19131	0.023	1e-05
sgs1	sgs1	YAL024C	LTE1		0.79479	0.011	0.97737	0.03	-0.18912	0.011	7e-05	status=JK
sgs1	sgs1	YJR054W	KCH1		0.43997	0.218	0.68312	0.335	-0.1859	0.218	0.02748
sgs1	sgs1	YKR082W	NUP133		0.72356	0.06	0.90676	0.008	-0.18297	0.06	0.00016
sgs1	sgs1	YNL077W	APJ1		0.93621	0.077	1.10064	0.159	-0.18135	0.077	0.00227	status=JK
sgs1	sgs1	YOR358W	HAP5		0.76186	0.004	0.91263	0.142	-0.17609	0.004	1e-05	status=JK
sgs1	sgs1	YHL020C	OPI1		0.6438	0.063	0.80807	0.043	-0.17256	0.063	0.00026
sgs1	sgs1	YJL207C	LAA1		0.82618	0.041	0.99679	0.023	-0.16999	0.041	3e-05
sgs1	sgs1	YKL139W	CTK1		0.54843	0.02	0.71375	0.019	-0.16926	0.02	0.00045	status=JK
sgs1	sgs1	YPL157W	TGS1		0.7773	0.047	0.93568	0.03	-0.16759	0.047	6e-05
sgs1	sgs1	YDL035C	GPR1		0.78346	0.169	0.96042	0.093	-0.1645	0.169	0.00265
sgs1	sgs1	YCL032W	STE50		0.40442	0.042	0.56664	0.025	-0.1641	0.042	0.0003
sgs1	sgs1	YDL122W	UBP1		0.85875	0.254	1.01636	0.039	-0.16322	0.254	0.00664
sgs1	sgs1	YKL093W	MBR1		0.75538	0.061	0.89456	0.264	-0.14869	0.061	0.00218	status=JK
sgs1	sgs1	YOL081W	IRA2		0.77888	0.027	0.92494	0.019	-0.14733	0.027	1e-05
sgs1	sgs1	YLR373C	VID22		0.77331	0.012	0.91932	0.021	-0.14697	0.012	0
sgs1	sgs1	YPR024W	YME1		0.71006	0.003	0.85372	0.012	-0.14412	0.003	1e-05	status=JK
sgs1	sgs1	YML095C	RAD10		0.87506	0.01	1.01349	0.017	-0.14209	0.01	4e-05	status=JK
sgs1	sgs1	YLL041C	SDH2		0.73682	0.181	0.80396	0.27	-0.14197	0.181	0.00388
sgs1	sgs1	YOL107W	YOL107W		0.86782	0.076	1.01366	0.014	-0.14156	0.076	0.00018
sgs1	sgs1	YHR061C	GIC1		0.5696	0.152	0.69956	0.259	-0.13642	0.152	0.00489
sgs1	sgs1	YDL074C	BRE1		0.59414	0.04	0.72995	0.002	-0.13622	0.04	9e-05
sgs1	sgs1	YHR008C	SOD2		0.77562	0.074	0.90698	0.023	-0.13347	0.074	0.00024
sgs1	sgs1	YCR033W	SNT1		0.89383	0.009	1.02818	0.007	-0.13329	0.009	0
sgs1	sgs1	YLR320W	MMS22		0.55871	0.011	0.68742	0.028	-0.13305	0.011	0.00012	status=JK
sgs1	sgs1	YOL013C	HRD1		0.93332	0.142	1.06392	0.033	-0.13215	0.142	0.00094
sgs1	sgs1	YMR305C	SCW10		0.85817	0.024	0.99299	0.011	-0.13031	0.024	1e-05
sgs1	sgs1	YNL130C	CPT1		0.9476	0.039	1.07921	0.028	-0.12979	0.039	2e-05
sgs1	sgs1	YPR197C	YPR197C		0.92683	0.034	1.05085	0.009	-0.12866	0.034	1e-05
sgs1	sgs1	YGR231C	PHB2		0.80782	0.031	0.94228	0.019	-0.12855	0.031	2e-05
sgs1	sgs1	YML011C	RAD33		0.87821	0.01	0.98916	0.044	-0.12851	0.01	5e-05	status=JK
sgs1	sgs1	YPL034W	YPL034W		0.9396	0.044	1.06645	0.01	-0.12784	0.044	3e-05
sgs1	sgs1	YER161C	SPT2		0.81934	0.013	0.94098	0.021	-0.12711	0.013	0
sgs1	sgs1	YKL053C-A	MDM35		0.68733	0.076	0.80065	0.045	-0.1251	0.076	0.00037
sgs1	sgs1	YHR077C	NMD2		0.92452	0.015	1.04224	0.044	-0.12485	0.015	8e-05	status=JK
sgs1	sgs1	YDR245W	MNN10		0.72286	0.047	0.84742	0.017	-0.12431	0.047	8e-05
sgs1	sgs1	YMR306W	FKS3		0.96663	0.04	1.09812	0.032	-0.12185	0.04	2e-05
sgs1	sgs1	YLR079W	SIC1		0.5352	0.006	0.66348	0.039	-0.12156	0.006	5e-05	status=JK
sgs1	sgs1	YNR025C	YNR025C		0.883	0.037	1.00133	0.03	-0.12142	0.037	0.0006	status=JK
sgs1	sgs1	YLL051C	FRE6		0.79013	0.121	0.91229	0.064	-0.12135	0.121	0.00097
sgs1	sgs1	YOR033C	EXO1		0.9536	0.022	1.08442	0.032	-0.12033	0.022	0
sgs1	sgs1	YLR131C	ACE2		0.89331	0.007	1.01336	0.02	-0.12009	0.007	2e-05	status=JK
sgs1	sgs1	YKL048C	ELM1		0.71549	0.071	0.84018	0.028	-0.11838	0.071	0.00027
sgs1	sgs1	YGL194C	HOS2		0.90494	0.027	1.02231	0.003	-0.11693	0.027	1e-05
sgs1	sgs1	YMR291W	TDA1		0.97322	0.044	1.08165	0.047	-0.11615	0.044	3e-05
sgs1	sgs1	YMR307W	GAS1		0.90608	0.049	1.02945	0.026	-0.1161	0.049	4e-05
sgs1	sgs1	YIL057C	RGI2		0.93939	0.044	1.04977	0.029	-0.11561	0.044	3e-05
sgs1	sgs1	YDL059C	RAD59		0.95584	0.027	1.07022	0.005	-0.11517	0.027	1e-05
sgs1	sgs1	YKL206C	ADD66		0.86114	0.062	0.97195	0.013	-0.11271	0.062	0.0001
sgs1	sgs1	YLR055C	SPT8		0.84627	0.003	0.9533	0.03	-0.11259	0.003	0	status=JK
sgs1	sgs1	YNL134C	YNL134C		0.91536	0.096	1.02587	0.002	-0.1101	0.096	0.00031
sgs1	sgs1	YOR003W	YSP3		0.92254	0.003	1.02875	0.018	-0.1083	0.003	0	status=JK
sgs1	sgs1	YPR135W	CTF4		0.68924	0.01	0.79629	0.009	-0.10809	0.01	7e-05	status=JK
sgs1	sgs1	YOR309C	YOR309C		0.86892	0.048	0.96822	0.04	-0.10727	0.048	5e-05
sgs1	sgs1	YJL188C	YJL188C		0.93299	0.005	1.03669	0.013	-0.10647	0.005	1e-05	status=JK
sgs1	sgs1	YPL167C	REV3		0.86352	0.037	0.96686	0.009	-0.10558	0.037	2e-05
sgs1	sgs1	YBR147W	RTC2		0.96737	0.008	1.07262	0.041	-0.10551	0.008	2e-05	status=JK
sgs1	sgs1	YDL074C	BRE1		0.6246	0.047	0.72797	0.011	-0.10342	0.047	0.00012
sgs1	sgs1	YOR156C	NFI1		0.87486	0.049	0.97589	0.029	-0.1032	0.049	5e-05
sgs1	sgs1	YKR028W	SAP190		0.88749	0.061	0.97532	0.051	-0.10272	0.061	9e-05
sgs1	sgs1	YMR306C-A	YMR306C-A		0.95219	0.011	1.05143	0.024	-0.10254	0.011	5e-05	status=JK
sgs1	sgs1	YPR089W	YPR089W		0.38082	0.012	0.48391	0.04	-0.10232	0.012	0.00032	status=JK
sgs1	sgs1	YMR080C	NAM7		1.00077	0.043	1.10463	0.031	-0.10154	0.043	2e-05
sgs1	sgs1	YLL029W	FRA1		0.85719	0.073	0.95878	0.014	-0.10098	0.073	0.00017
sgs1	sgs1	YDR334W	SWR1		0.85125	0.026	0.95143	0.046	-0.10035	0.026	1e-05
sgs1	sgs1	YER128W	VFA1		0.91966	0.077	1.01376	0.011	-0.10005	0.077	0.00016
sgs1	sgs1	YML096W	YML096W		0.91147	0.041	1.01287	0.029	-0.09888	0.041	2e-05
sgs1	sgs1	YNL082W	PMS1		0.80517	0.032	0.90598	0.022	-0.09859	0.032	2e-05
sgs1	sgs1	YIL153W	RRD1		0.8974	0.032	0.98964	0.026	-0.09809	0.032	1e-05
sgs1	sgs1	YBR168W	PEX32		0.81457	0.05	0.90946	0.012	-0.09704	0.05	7e-05
sgs1	sgs1	YKL069W	YKL069W		0.78247	0.027	0.87053	0.032	-0.0964	0.027	1e-05
sgs1	sgs1	YGL180W	ATG1		0.81947	0.008	0.91479	0.002	-0.09532	0.008	3e-05	status=JK
sgs1	sgs1	YPR164W	MMS1		0.79626	0.007	0.89306	0.009	-0.09507	0.007	3e-05	status=JK
sgs1	sgs1	YMR027W	YMR027W		0.96523	0.025	1.05568	0.015	-0.0947	0.025	1e-05
sgs1	sgs1	YBR036C	CSG2		0.749	0.016	0.84367	0.017	-0.09468	0.016	0
sgs1	sgs1	YGL250W	RMR1		0.87526	0.013	0.96974	0.047	-0.09463	0.013	0
sgs1	sgs1	YML113W	DAT1		0.94889	0.025	1.03264	0.033	-0.09411	0.025	0
sgs1	sgs1	YJR074W	MOG1		0.74848	0.032	0.84177	0.041	-0.09398	0.032	2e-05
sgs1	sgs1	YOR297C	TIM18		0.89152	0.019	0.9854	0.022	-0.09358	0.019	0
sgs1	sgs1	YLR177W	YLR177W		0.90758	0.023	1.00311	0.01	-0.09286	0.023	0
sgs1	sgs1	YDR539W	FDC1		0.8892	0.058	0.97307	0.032	-0.09214	0.058	8e-05
sgs1	sgs1	YBR177C	EHT1		0.94272	0.007	1.02651	0.029	-0.09213	0.007	2e-05	status=JK
sgs1	sgs1	YML035C-A	YML035C-A		0.92355	0.013	1.01362	0.014	-0.09195	0.013	0
sgs1	sgs1	YPR050C	YPR050C		0.91574	0.2	1.00957	0.037	-0.09144	0.199	0.00273
sgs1	sgs1	YGR049W	SCM4		0.89803	0.085	0.99027	0.011	-0.09126	0.085	0.00023
sgs1	sgs1	YCR060W	TAH1		0.95021	0.02	1.04789	0.038	-0.09096	0.019	0
sgs1	sgs1	YNL117W	MLS1		0.73339	0.032	0.82512	0.057	-0.09093	0.032	2e-05
sgs1	sgs1	YDR290W	YDR290W		0.82757	0.011	0.91891	0.013	-0.09076	0.011	0
sgs1	sgs1	YGR181W	TIM13		0.92307	0.062	1.01199	0.012	-0.08982	0.062	8e-05
sgs1	sgs1	YDR058C	TGL2		0.85262	0.04	0.94325	0.023	-0.0897	0.04	3e-05
sgs1	sgs1	YDR163W	CWC15		0.90598	0.007	0.99488	0.018	-0.08967	0.007	2e-05	status=JK
sgs1	sgs1	YJL115W	ASF1		0.71316	0.004	0.80576	0.014	-0.08948	0.004	1e-05	status=JK
sgs1	sgs1	YGL007W	YGL007W		0.74261	0.034	0.83287	0.015	-0.08924	0.034	3e-05
sgs1	sgs1	YBR103W	SIF2		0.87364	0.022	0.95962	0.011	-0.08826	0.021	0
sgs1	sgs1	YPL149W	ATG5		0.84799	0.053	0.93101	0.012	-0.08728	0.052	7e-05
sgs1	sgs1	YJL067W	YJL067W		0.9611	0.026	1.04582	0.004	-0.08619	0.026	1e-05
sgs1	sgs1	YHR179W	OYE2		0.93655	0.052	1.02805	0.031	-0.08591	0.052	5e-05
sgs1	sgs1	YBR137W	YBR137W		0.77374	0.021	0.86136	0.017	-0.0858	0.021	1e-05
sgs1	sgs1	YBR289W	SNF5		0.19558	0.046	0.28427	0.015	-0.08574	0.046	0.00344
sgs1	sgs1	YML068W	ITT1		0.97765	0.032	1.06533	0.038	-0.08508	0.032	1e-05
sgs1	sgs1	YNL064C	YDJ1		0.86053	0.025	0.94389	0.031	-0.08467	0.025	1e-05
sgs1	sgs1	YOR078W	BUD21		0.41407	0.036	0.49364	0.021	-0.08455	0.036	0.00018
sgs1	sgs1	YGL168W	HUR1		0.62824	0.014	0.70917	0.036	-0.08434	0.014	0
sgs1	sgs1	YLR225C	YLR225C		0.85829	0.071	0.93219	0.041	-0.08383	0.071	0.00015
sgs1	sgs1	YDR006C	SOK1		0.89778	0.022	0.97856	0.011	-0.08367	0.022	0
sgs1	sgs1	YGR012W	YGR012W		0.89958	0.055	0.97928	0.014	-0.08321	0.055	6e-05
sgs1	sgs1	YJL049W	YJL049W		0.89067	0.043	0.97603	0.019	-0.08309	0.043	3e-05
sgs1	sgs1	YCL010C	SGF29		0.81339	0.023	0.89769	0.013	-0.08273	0.023	1e-05
sgs1	sgs1	YKR029C	SET3		0.93733	0.017	1.01958	0.011	-0.08256	0.017	0
sgs1	sgs1	YPL182C	YPL182C		1.0069	0.018	1.09479	0.02	-0.08234	0.018	0
sgs1	sgs1	YIR037W	HYR1		0.9091	0.033	0.99168	0.006	-0.08169	0.033	1e-05
sgs1	sgs1	YKL207W	EMC3		0.97211	0.045	1.05392	0.003	-0.08158	0.045	3e-05
sgs1	sgs1	YBR194W	AIM4		0.81914	0.015	0.90211	0.005	-0.08148	0.015	0
sgs1	sgs1	YCL024W	KCC4		0.98698	0.015	1.06298	0.028	-0.08096	0.015	8e-05	status=JK
sgs1	sgs1	YBR273C	UBX7		0.89562	0.049	0.98036	0.018	-0.08077	0.049	4e-05
sgs1	sgs1	YOR308C	SNU66		1.05587	0.003	0.97612	0.015	0.08009	0.003	0
sgs1	sgs1	YIL027C	EMC5		1.077	0.024	1.00151	0.025	0.08022	0.024	0
sgs1	sgs1	YKR059W	TIF1		0.90134	0.003	0.81644	0.027	0.08027	0.003	0
sgs1	sgs1	YDR057W	YOS9		1.07666	0.02	0.99156	0.056	0.08049	0.02	0.00012	status=JK
sgs1	sgs1	YPL102C	YPL102C		0.93024	0.004	0.85527	0.031	0.08052	0.004	0	status=JK
sgs1	sgs1	YPR066W	UBA3		0.7666	0.032	0.6873	0.018	0.08063	0.032	2e-05
sgs1	sgs1	YLR172C	DPH5		1.03411	0.05	0.95013	0.006	0.08068	0.05	3e-05
sgs1	sgs1	YML081C-A	ATP18		0.98438	0.047	0.90014	0.01	0.08131	0.047	3e-05
sgs1	sgs1	YPL213W	LEA1		0.83645	0.025	0.75206	0.032	0.08145	0.025	1e-05
sgs1	sgs1	YFL003C	MSH4		0.84138	0.051	0.76593	0.058	0.0815	0.051	6e-05
sgs1	sgs1	YMR318C	ADH6		1.11898	0.04	1.03678	0.016	0.08157	0.04	1e-05
sgs1	sgs1	YNL095C	YNL095C		1.08196	0.057	0.99663	0.023	0.08157	0.057	4e-05
sgs1	sgs1	YPL178W	CBC2		0.60281	0.35	0.50769	0.252	0.08162	0.349	0.04099
sgs1	sgs1	YHR049C-A	YHR049C-A		1.01229	0.039	0.93112	0.015	0.08181	0.039	2e-05
sgs1	sgs1	YIL152W	YIL152W		1.09677	0.026	1.01197	0.025	0.08183	0.026	0
sgs1	sgs1	YOR136W	IDH2		0.95244	0.005	0.86652	0.017	0.08258	0.005	1e-05	status=JK
sgs1	sgs1	YFL001W	DEG1		1.05218	0.017	0.97032	0.039	0.0827	0.017	0
sgs1	sgs1	YHR171W	ATG7		0.95936	0.051	0.877	0.001	0.08272	0.051	4e-05
sgs1	sgs1	YBR181C	RPS6B		0.79396	0.062	0.71255	0.021	0.08305	0.062	0.00013
sgs1	sgs1	YDR072C	IPT1		1.15997	0.034	1.08146	0.046	0.08318	0.034	1e-05
sgs1	sgs1	YNL069C	RPL16B		0.90756	0.046	0.83038	0.027	0.08335	0.046	4e-05
sgs1	sgs1	YGL133W	ITC1		1.05054	0.047	0.95222	0.061	0.08345	0.047	3e-05
sgs1	sgs1	YML032C	RAD52		0.89198	0.007	0.8084	0.007	0.08347	0.007	2e-05	status=JK
sgs1	sgs1	YJL171C	YJL171C		1.13364	0.043	1.05305	0.007	0.08383	0.043	2e-05
sgs1	sgs1	YDR084C	TVP23		1.13903	0.004	1.05484	0.031	0.08449	0.004	0	status=JK
sgs1	sgs1	YLR376C	PSY3		1.06441	0.028	0.97994	0.006	0.08452	0.028	0
sgs1	sgs1	YML012C-A	YML012C-A		0.64171	0.021	0.58382	0.113	0.08481	0.021	0.00034	status=JK
sgs1	sgs1	YMR038C	CCS1		0.18639	0.021	0.10041	0.002	0.08491	0.021	0.00041
sgs1	sgs1	YER131W	RPS26B		0.98063	0.051	0.90224	0.023	0.08533	0.051	4e-05
sgs1	sgs1	YLR200W	YKE2		1.13947	0.032	1.05184	0.005	0.08539	0.032	1e-05
sgs1	sgs1	YLR242C	ARV1		0.98856	0.009	0.89868	0.016	0.08702	0.009	3e-05	status=JK
sgs1	sgs1	YML102W	CAC2		0.94869	0.038	0.87097	0.044	0.08736	0.038	2e-05
sgs1	sgs1	YOR333C	YOR333C		1.03492	0.024	0.9478	0.004	0.08786	0.024	0
sgs1	sgs1	YDR378C	LSM6		0.80107	0.002	0.71262	0.001	0.08806	0.002	0	status=JK
sgs1	sgs1	YJL211C	YJL211C		1.03859	0.007	0.95139	0.003	0.08822	0.007	1e-05	status=JK
sgs1	sgs1	YCL014W	BUD3		1.102	0.005	1.01524	0.009	0.0885	0.005	1e-05	status=JK
sgs1	sgs1	YJL138C	TIF2		0.85346	0.018	0.76529	0.02	0.0887	0.018	0
sgs1	sgs1	YDR101C	ARX1		0.90072	0.012	0.8121	0.004	0.08895	0.012	6e-05	status=JK
sgs1	sgs1	YBR134W	YBR134W		1.06708	0.027	0.98031	0.018	0.08924	0.027	0
sgs1	sgs1	YGR105W	VMA21		0.87604	0.006	0.78635	0.003	0.08931	0.006	0
sgs1	sgs1	YBL025W	RRN10		0.18556	0.034	0.10162	0.02	0.08942	0.034	0.00161
sgs1	sgs1	YNL037C	IDH1		0.98867	0.019	0.89961	0.014	0.08947	0.019	0
sgs1	sgs1	YML035C	AMD1		1.03978	0.057	0.95758	0.034	0.08949	0.057	4e-05
sgs1	sgs1	YML062C	MFT1		0.62605	0.056	0.53856	0.018	0.09014	0.056	0.00019
sgs1	sgs1	YBR165W	UBS1		0.73294	0.018	0.63959	0.005	0.09141	0.018	0
sgs1	sgs1	YBL081W	YBL081W		1.07027	0.059	0.97391	0.037	0.09145	0.059	5e-05
sgs1	sgs1	YGR173W	RBG2		0.81142	0.034	0.72294	0.014	0.0918	0.034	0.00057	status=JK
sgs1	sgs1	YJL037W	IRC18		1.02896	0.026	0.94726	0.043	0.0919	0.026	0
sgs1	sgs1	YDR004W	RAD57		0.97079	0.061	0.87001	0.043	0.09219	0.061	7e-05
sgs1	sgs1	YCR050C	YCR050C		1.05431	0.008	0.96369	0.011	0.09234	0.008	2e-05	status=JK
sgs1	sgs1	YGL163C	RAD54		0.94445	0.046	0.85347	0.039	0.09288	0.046	3e-05
sgs1	sgs1	YDL065C	PEX19		1.03062	0.009	0.93826	0.003	0.09302	0.009	0
sgs1	sgs1	YNL012W	SPO1		1.08407	0.035	0.99615	0.009	0.09304	0.035	1e-05
sgs1	sgs1	YHL031C	GOS1		0.8248	0.051	0.72454	0.032	0.0937	0.051	6e-05
sgs1	sgs1	YER106W	MAM1		1.02528	0.018	0.93489	0.023	0.09399	0.018	0.0001	status=JK
sgs1	sgs1	YNL142W	MEP2		1.08497	0.03	0.99176	0.035	0.09402	0.03	1e-05
sgs1	sgs1	YML038C	YMD8		0.86824	0.03	0.76246	0.032	0.09413	0.03	1e-05
sgs1	sgs1	YKL051W	SFK1		1.07053	0.028	0.98761	0.035	0.09466	0.028	0
sgs1	sgs1	YOL159C	YOL159C		1.13462	0.068	1.03676	0.017	0.09684	0.067	6e-05
sgs1	sgs1	YOR300W	YOR300W		0.53774	0.019	0.44962	0.042	0.09717	0.019	0.00043	status=JK
sgs1	sgs1	YML128C	MSC1		1.06527	0.034	0.96471	0.032	0.09775	0.034	1e-05
sgs1	sgs1	YOL162W	YOL162W		1.04117	0.007	0.94365	0.004	0.09785	0.007	2e-05	status=JK
sgs1	sgs1	YBL087C	RPL23A		0.9426	0.012	0.82813	0.052	0.09792	0.012	5e-05	status=JK
sgs1	sgs1	YBL021C	HAP3		0.93266	0.12	0.74417	0.325	0.09839	0.12	0.00057
sgs1	sgs1	YCR068W	ATG15		0.95008	0.051	0.85318	0.024	0.09881	0.051	4e-05
sgs1	sgs1	YGL198W	YIP4		0.87088	0.025	0.77284	0.024	0.09978	0.025	1e-05
sgs1	sgs1	YML026C	RPS18B		0.89471	0.022	0.7985	0.022	0.09985	0.022	0
sgs1	sgs1	YHR025W	THR1		0.78805	0.026	0.68391	0.024	0.10091	0.026	1e-05
sgs1	sgs1	YGR068C	ART5		1.04955	0.021	0.9541	0.017	0.1017	0.021	0
sgs1	sgs1	YOR093C	YOR093C		0.8245	0.018	0.72307	0.005	0.10274	0.018	0.00016	status=JK
sgs1	sgs1	YGR027C	RPS25A		0.97613	0.054	0.87441	0.014	0.10335	0.054	5e-05
sgs1	sgs1	YJR120W	YJR120W		1.06154	0.02	0.96189	0.025	0.1034	0.02	0.00012	status=JK
sgs1	sgs1	YDL232W	OST4		0.79461	0.073	0.68639	0.05	0.10383	0.073	0.00022
sgs1	sgs1	YJR118C	ILM1		0.71389	0.03	0.60784	0.04	0.10538	0.03	2e-05
sgs1	sgs1	YIR033W	MGA2		0.9931	0.015	0.89153	0.018	0.1056	0.015	0
sgs1	sgs1	YOR245C	DGA1		0.57774	0.078	0.49254	0.087	0.10603	0.078	0.00068
sgs1	sgs1	YGR037C	ACB1		0.6748	0.035	0.57123	0.014	0.10762	0.035	4e-05
sgs1	sgs1	YBR200W	BEM1		0.67731	0.424	0.53533	0.43	0.10885	0.424	0.04951
sgs1	sgs1	YGR101W	PCP1		0.88861	0.017	0.77729	0.017	0.10904	0.017	0
sgs1	sgs1	YLR338W	YLR338W		0.98139	0.02	0.87346	0.016	0.10926	0.02	0
sgs1	sgs1	YDR068W	DOS2		1.11813	0.037	1.00574	0.008	0.1102	0.037	1e-05
sgs1	sgs1	YPR179C	HDA3		0.95202	0.005	0.84378	0.017	0.11073	0.005	1e-05	status=JK
sgs1	sgs1	YGL024W	YGL024W		0.52547	0.041	0.40269	0.053	0.11396	0.041	0.00013
sgs1	sgs1	YLR065C	ENV10		0.95335	0.002	0.83709	0.018	0.11411	0.002	0	status=JK
sgs1	sgs1	YNL081C	SWS2		0.96483	0.045	0.85337	0.01	0.11413	0.045	3e-05
sgs1	sgs1	YFR047C	BNA6		0.78736	0.014	0.67109	0.018	0.11503	0.014	0.0001	status=JK
sgs1	sgs1	YDR207C	UME6		0.84416	0.039	0.72969	0.009	0.11591	0.039	3e-05
sgs1	sgs1	YGL248W	PDE1		0.92796	0.087	0.82102	0.12	0.1164	0.087	0.00022
sgs1	sgs1	YOR106W	VAM3		0.798	0.008	0.67378	0.063	0.11746	0.008	3e-05	status=JK
sgs1	sgs1	YGL212W	VAM7		0.61867	0.127	0.49871	0.143	0.1181	0.126	0.01366	status=JK
sgs1	sgs1	YHL023C	NPR3		0.96857	0.006	0.85295	0.021	0.11923	0.006	1e-05	status=JK
sgs1	sgs1	YOR014W	RTS1		1.01211	0.017	0.89227	0.007	0.1211	0.017	0
sgs1	sgs1	YGL253W	HXK2		1.02103	0.02	0.9048	0.021	0.12279	0.02	0
sgs1	sgs1	YHR184W	SSP1		1.13208	0.019	1.01115	0.014	0.1232	0.019	0
sgs1	sgs1	YNL153C	GIM3		0.8944	0.033	0.76947	0.02	0.12413	0.033	1e-05
sgs1	sgs1	YMR041C	ARA2		0.68053	0.016	0.58033	0.098	0.12434	0.016	0.00019	status=JK
sgs1	sgs1	YPL246C	RBD2		1.07016	0.015	0.95218	0.036	0.12512	0.015	6e-05	status=JK
sgs1	sgs1	YBR025C	OLA1		0.91655	0.015	0.77977	0.046	0.12573	0.015	0
sgs1	sgs1	YLR393W	ATP10		1.03969	0.026	0.91445	0.002	0.12586	0.026	0
sgs1	sgs1	YNL135C	FPR1		1.06123	0.061	0.93165	0.04	0.12616	0.061	5e-05
sgs1	sgs1	YDR388W	RVS167		0.90684	0.018	0.77723	0.024	0.12762	0.018	0
sgs1	sgs1	YIL132C	CSM2		1.13767	0.011	1.00654	0.02	0.12791	0.011	3e-05	status=JK
sgs1	sgs1	YIL157C	COA1		1.0866	0.007	0.95465	0.014	0.13059	0.007	1e-05	status=JK
sgs1	sgs1	YHR180W	YHR180W		0.60432	0.085	0.47337	0.003	0.13076	0.085	0.00075
sgs1	sgs1	YHR194W	MDM31		0.2389	0.159	0.12974	0.105	0.13193	0.159	0.05781
sgs1	sgs1	YGL174W	BUD13		0.9763	0.039	0.84883	0.025	0.13266	0.039	2e-05
sgs1	sgs1	YMR312W	ELP6		0.97692	0.051	0.84604	0.011	0.13398	0.051	4e-05
sgs1	sgs1	YOL039W	RPP2A		1.08568	0.005	0.94817	0.047	0.13894	0.005	1e-05	status=JK
sgs1	sgs1	YMR063W	RIM9		1.01884	0.006	0.88089	0.027	0.14091	0.006	1e-05	status=JK
sgs1	sgs1	YPL024W	RMI1		0.9846	0.033	0.8375	0.018	0.1425	0.033	1e-05
sgs1	sgs1	YMR019W	STB4		1.02694	0.007	0.88244	0.022	0.14272	0.007	0
sgs1	sgs1	YGR118W	RPS23A		0.93991	0.005	0.80285	0.033	0.14403	0.005	1e-05	status=JK
sgs1	sgs1	YDL062W	YDL062W		1.02508	0.026	0.88076	0.019	0.14407	0.026	0.00021	status=JK
sgs1	sgs1	YDR076W	RAD55		1.03219	0.017	0.89365	0.019	0.14446	0.017	0
sgs1	sgs1	YBR122C	MRPL36		1.16308	0.025	1.01582	0.004	0.14841	0.025	0
sgs1	sgs1	YER162C	RAD4		0.49233	0.225	0.34829	0.063	0.15798	0.225	0.0221
sgs1	sgs1	YBR016W	YBR016W		0.73791	0.008	0.57123	0.046	0.1632	0.008	4e-05	status=JK
sgs1	sgs1	YIL040W	APQ12		0.60008	0.391	0.43455	0.071	0.16598	0.39	0.05447
sgs1	sgs1	YBR132C	AGP2		1.147	0.012	0.98546	0.056	0.16746	0.012	0
sgs1	sgs1	YOL112W	MSB4		0.71809	0.038	0.55239	0.014	0.1682	0.038	4e-05
sgs1	sgs1	YLR234W	TOP3		0.98965	0.041	0.81809	0.015	0.17134	0.041	2e-05
sgs1	sgs1	YGL059W	PKP2		1.00399	0.072	0.83939	0.037	0.17275	0.072	0.0001
sgs1	sgs1	YMR065W	KAR5		0.76322	0.007	0.58027	0.039	0.17849	0.007	3e-05	status=JK
sgs1	sgs1	YGL105W	ARC1		0.18739	0.116	0.00849	0.015	0.18731	0.116	0.04851
sgs1	sgs1	YDR513W	GRX2		0.87287	0.04	0.68918	0.071	0.19263	0.04	3e-05
sgs1	sgs1	YMR294W-A	YMR294W-A		0.8258	0.065	0.62985	0.029	0.20141	0.065	0.00014
sgs1	sgs1	YNL141W	AAH1		0.89915	0.011	0.70293	0.023	0.20235	0.011	0
sgs1	sgs1	YNL076W	MKS1		1.08437	0.047	0.85726	0.004	0.22623	0.047	2e-05
sgs1	sgs1	YKL204W	EAP1		0.39559	0.129	0.17574	0.038	0.22919	0.129	0.03367	status=JK
sgs1	sgs1	YLR235C	YLR235C		1.01806	0.09	0.78548	0.011	0.23489	0.09	0.00019
sgs1	sgs1	YMR011W	HXT2		0.74669	0.024	0.50119	0.003	0.2439	0.024	0.00035	status=JK
sgs1	sgs1	YOR293W	RPS10A		0.91684	0.007	0.67226	0.013	0.24471	0.007	2e-05	status=JK
sgs1	sgs1	YGL160W	AIM14		0.83072	0.084	0.56739	0.082	0.24525	0.084	0.00028
sgs1	sgs1	YNL080C	EOS1		0.83649	0.031	0.59062	0.03	0.2457	0.031	1e-05
sgs1	sgs1	YOL067C	RTG1		1.01292	0.02	0.76353	0.017	0.25121	0.02	0
sgs1	sgs1	YCR063W	BUD31		0.86329	0.043	0.61146	0.003	0.25282	0.043	3e-05
sgs1	sgs1	YHL029C	OCA5		0.92624	0.293	0.66527	0.22	0.25681	0.293	0.00802
sgs1	sgs1	YJL206C-A	YJL206C-A		0.75183	0.036	0.4858	0.03	0.26412	0.036	3e-05
sgs1	sgs1	YOR312C	RPL20B		1.09753	0.006	0.81807	0.039	0.27988	0.006	1e-05	status=JK
sgs1	sgs1	YGL252C	RTG2		0.90447	0.036	0.59798	0.032	0.31538	0.036	2e-05
sgs1	sgs1	YJR090C	GRR1		0.48473	0.24	0.17037	0.049	0.31685	0.24	0.0272
sgs1	sgs1	YBL103C	RTG3		1.00507	0.028	0.68617	0.022	0.31857	0.028	1e-05
sgs1	sgs1	YGL214W	YGL214W		0.51534	0.15	0.17624	0.039	0.32001	0.15	0.00636
sgs1	sgs1	YGR019W	UGA1		0.5091	0.074	0.17976	0.136	0.33592	0.073	0.00688	status=JK
sgs1	sgs1	YNL046W	YNL046W		0.51931	0.219	0.14847	0.071	0.33874	0.218	0.01768
sgs1	sgs1	YJR077C	MIR1		0.7958	0.388	0.44333	0.09	0.38658	0.388	0.02619
sgs1	sgs1	YGL237C	HAP2		1.13199	0.304	0.6971	0.042	0.45262	0.304	0.00502
sgs1	sgs1	YBR204C	LDH1		0.52601	0.078	0	0	0.52577	0.078	0.0072	status=JK

## Sheet: Table S5
Query ORF	Query Name	Array ORF	Array Name	Array annotation	Normalized colony size (EXPERIMENT)	Normalized colony std. dev. (EXPERIMENT)	Normalized colony size (CONTROL)	Normalized colony std. dev. (CONTROL)	Score	Score stdev	p-Value	Additional information
sgs1	sgs1	YJL092W	SRS2		0.38985	0.045	0.98216	0.013	-0.59533	0.045	0.00043
sgs1	sgs1	YLR135W	SLX4		0.42321	0.025	0.98292	0.006	-0.5582	0.025	6e-05
sgs1	sgs1	YGR081C	SLX9		0.36042	0.151	0.87752	0.12	-0.53867	0.151	0.01739
sgs1	sgs1	YBR228W	SLX1		0.52678	0.02	1.04293	0.004	-0.51424	0.02	0.0005	status=JK
sgs1	sgs1	YBR231C	SWC5		0.37032	0.183	0.81035	0.244	-0.50524	0.182	0.027
sgs1	sgs1	YLR154C	RNH203		0.49231	0.036	0.99788	0.013	-0.50292	0.036	0.00011
sgs1	sgs1	YHR134W	WSS1		0.41353	0.086	0.9097	0.005	-0.49462	0.085	0.00235
sgs1	sgs1	YHR153C	SPO16		0.37716	0.118	0.86177	0.066	-0.47287	0.118	0.00782
sgs1	sgs1	YER116C	SLX8		0.28083	0.069	0.73044	0.053	-0.4555	0.069	0.0039
sgs1	sgs1	YGR097W	ASK10		0.41713	0.098	0.83167	0.259	-0.43654	0.098	0.01789	status=JK
sgs1	sgs1	YDR279W	RNH202		0.55693	0.016	0.99318	0.003	-0.43463	0.016	1e-05
sgs1	sgs1	YDR386W	MUS81		0.53894	0.079	0.96756	0.016	-0.43145	0.079	0.00084
sgs1	sgs1	YBR099C	YBR099C		0.5601	0.017	0.98306	0.012	-0.42889	0.017	0.00031	status=JK
sgs1	sgs1	YBR094W	PBY1		0.5944	0.02	1.01276	0.036	-0.42424	0.02	0.00037	status=JK
sgs1	sgs1	YBR100W	YBR100W		0.55167	0.042	0.95677	0.026	-0.40591	0.042	0.00012
sgs1	sgs1	YBR098W	MMS4		0.66002	0.004	1.04671	0.021	-0.38626	0.004	1e-05	status=JK
sgs1	sgs1	YHR017W	YSC83		0.60546	0.344	0.90651	0.256	-0.38511	0.344	0.03888
sgs1	sgs1	YBL021C	HAP3		0.46615	0.233	0.74417	0.325	-0.36718	0.233	0.02808
sgs1	sgs1	YOR144C	ELG1		0.62198	0.059	0.98832	0.003	-0.36553	0.059	0.00024
sgs1	sgs1	YOR080W	DIA2		0.22903	0.034	0.59139	0.044	-0.35862	0.034	0.00086
sgs1	sgs1	YDL013W	SLX5		0.17879	0.022	0.52182	0.047	-0.34919	0.022	0.00051
sgs1	sgs1	YKL093W	MBR1		0.55696	0.31	0.89456	0.264	-0.34701	0.31	0.03698
sgs1	sgs1	YKL094W	YJU3		0.67304	0.287	0.97906	0.091	-0.33384	0.287	0.01832
sgs1	sgs1	YNL121C	TOM70		0.71609	0.222	1.04394	0.008	-0.32694	0.222	0.00753
sgs1	sgs1	YCL061C	MRC1		0.63366	0.03	0.95883	0.019	-0.32677	0.03	3e-05
sgs1	sgs1	YGL175C	SAE2		0.66871	0.017	0.98432	0.02	-0.31845	0.017	0
sgs1	sgs1	YGL136C	MRM2		0.4423	0.129	0.67553	0.338	-0.31052	0.129	0.02736	status=JK
sgs1	sgs1	YKL113C	RAD27		0.53778	0.009	0.8425	0.025	-0.30954	0.009	0.0001	status=JK
sgs1	sgs1	YNL143C	YNL143C		0.71664	0.084	1.02304	0.026	-0.30943	0.084	0.00044
sgs1	sgs1	YER111C	SWI4		0.66443	0.007	0.96602	0.022	-0.30495	0.007	4e-05	status=JK
sgs1	sgs1	YHR154W	RTT107		0.64666	0.062	0.957	0.028	-0.3039	0.062	0.00024
sgs1	sgs1	YJR043C	POL32		0.67397	0.021	0.97812	0.014	-0.30363	0.021	1e-05
sgs1	sgs1	YCL060C	YCL060C		0.67803	0.018	0.97146	0.019	-0.29924	0.018	0
sgs1	sgs1	YDL077C	VAM6		0.37497	0.095	0.62174	0.298	-0.29309	0.095	0.02079	status=JK
sgs1	sgs1	YDL070W	BDF2		0.72197	0.147	0.99617	0.031	-0.28229	0.147	0.00224
sgs1	sgs1	YMR048W	CSM3		0.70162	0.012	0.96881	0.018	-0.27219	0.012	0.0001	status=JK
sgs1	sgs1	YHR031C	RRM3		0.68059	0.112	0.934	0.007	-0.25756	0.111	0.00118
sgs1	sgs1	YKR042W	UTH1		0.73519	0.249	0.9757	0.027	-0.25338	0.249	0.00974
sgs1	sgs1	YGR281W	YOR1		0.77825	0.042	1.01952	0.018	-0.2456	0.042	4e-05
sgs1	sgs1	YJL139C	YUR1		0.60946	0.284	0.88215	0.154	-0.24439	0.284	0.02323
sgs1	sgs1	YDL185W	VMA1		0.80926	0.057	1.05663	0.022	-0.24107	0.057	0.0001
sgs1	sgs1	YNR006W	VPS27		0.62592	0.203	0.8546	0.01	-0.23426	0.203	0.00854
sgs1	sgs1	YMR300C	ADE4		0.86728	0.075	1.10606	0.041	-0.23296	0.075	0.00017
sgs1	sgs1	YML028W	TSA1		0.71504	0.04	0.93757	0.02	-0.21706	0.04	5e-05
sgs1	sgs1	YJL183W	MNN11		0.80773	0.175	1.01649	0.043	-0.2071	0.174	0.00267
sgs1	sgs1	YMR291W	TDA1		0.88501	0.194	1.08165	0.047	-0.20587	0.194	0.00277
sgs1	sgs1	YOR025W	HST3		0.79895	0.026	1.00455	0.025	-0.20349	0.026	1e-05
sgs1	sgs1	YHL036W	MUP3		0.75545	0.074	0.96471	0.218	-0.20034	0.074	0.00315	status=JK
sgs1	sgs1	YOL081W	IRA2		0.72707	0.153	0.92494	0.019	-0.19965	0.153	0.00249
sgs1	sgs1	YKL150W	MCR1		0.84914	0.032	1.03715	0.047	-0.19074	0.032	1e-05
sgs1	sgs1	YNL117W	MLS1		0.63498	0.039	0.82512	0.057	-0.19048	0.039	0.00125	status=JK
sgs1	sgs1	YJR084W	YJR084W		0.7994	0.224	0.98218	0.024	-0.18503	0.224	0.00564
sgs1	sgs1	YGL237C	HAP2		0.49564	0.241	0.6971	0.042	-0.18377	0.241	0.02604
sgs1	sgs1	YGL218W	YGL218W		0.39258	0.016	0.56979	0.017	-0.18265	0.016	0.00057	status=JK
sgs1	sgs1	YGL007W	YGL007W		0.65003	0.019	0.83287	0.015	-0.18219	0.019	1e-05
sgs1	sgs1	YKL139W	CTK1		0.53567	0.005	0.71375	0.019	-0.18202	0.005	0
sgs1	sgs1	YBL039C	URA7		0.81543	0.034	0.99306	0.006	-0.17602	0.034	2e-05
sgs1	sgs1	YPR024W	YME1		0.68221	0.072	0.85372	0.012	-0.17314	0.072	0.00032
sgs1	sgs1	YDL074C	BRE1		0.55945	0.06	0.72995	0.002	-0.1719	0.06	0.00034
sgs1	sgs1	YNL134C	YNL134C		0.85612	0.07	1.02587	0.002	-0.17078	0.07	0.00015
sgs1	sgs1	YNR010W	CSE2		0.63924	0.037	0.80809	0.025	-0.16887	0.037	5e-05
sgs1	sgs1	YLR373C	VID22		0.75731	0.018	0.91932	0.021	-0.16296	0.018	0.00019	status=JK
sgs1	sgs1	YER128W	VFA1		0.85676	0.036	1.01376	0.011	-0.16198	0.036	0.00059	status=JK
sgs1	sgs1	YKR101W	SIR1		0.71861	0.07	0.88216	0.004	-0.16187	0.07	0.00026
sgs1	sgs1	YOR078W	BUD21		0.33733	0.015	0.49364	0.021	-0.16154	0.015	0.00067	status=JK
sgs1	sgs1	YLR418C	CDC73		0.73451	0.019	0.89493	0.005	-0.16098	0.019	0
sgs1	sgs1	YNR018W	RCF2		0.48756	0.038	0.64601	0.054	-0.16005	0.038	0.00013
sgs1	sgs1	YJL175W	YJL175W		0.55541	0.071	0.70715	0.001	-0.15159	0.071	0.00056
sgs1	sgs1	YGR092W	DBF2		0.66732	0.006	0.81681	0.002	-0.14988	0.006	3e-05	status=JK
sgs1	sgs1	YMR305C	SCW10		0.84013	0.055	0.99299	0.011	-0.14976	0.055	8e-05
sgs1	sgs1	YGR286C	BIO2		0.82021	0.073	0.96914	0.002	-0.14903	0.073	0.00019
sgs1	sgs1	YPL247C	YPL247C		0.80687	0.167	0.94783	0.028	-0.14519	0.167	0.00234
sgs1	sgs1	YJL172W	CPS1		0.86298	0.146	0.99997	0.063	-0.14445	0.146	0.0013
sgs1	sgs1	YLR448W	RPL6B		0.6796	0.12	0.78292	0.149	-0.14089	0.12	0.00149
sgs1	sgs1	YLR178C	TFS1		0.90517	0.139	1.04201	0.03	-0.14085	0.139	0.00097
sgs1	sgs1	YKR016W	FCJ1		0.80718	0.026	0.94959	0.049	-0.13969	0.026	0.00034	status=JK
sgs1	sgs1	YHR021C	RPS27B		0.45554	0.116	0.58897	0.012	-0.1362	0.116	0.00434
sgs1	sgs1	YGR250C	YGR250C		0.87012	0.045	1.00498	0.004	-0.13464	0.045	4e-05
sgs1	sgs1	YGL194C	HOS2		0.88871	0.059	1.02231	0.003	-0.13367	0.059	8e-05
sgs1	sgs1	YPL022W	RAD1		0.77335	0.043	0.90348	0.031	-0.13358	0.043	5e-05
sgs1	sgs1	YGL241W	KAP114		0.91739	0.149	1.0524	0.038	-0.13255	0.149	0.00115
sgs1	sgs1	YML048W	GSF2		0.86243	0.024	0.99235	0.005	-0.1321	0.024	1e-05
sgs1	sgs1	YLL041C	SDH2		0.74868	0.097	0.80396	0.27	-0.13011	0.097	0.00059
sgs1	sgs1	YCR033W	SNT1		0.89662	0.004	1.02818	0.007	-0.12979	0.004	1e-05	status=JK
sgs1	sgs1	YNL136W	EAF7		0.80873	0.008	0.93452	0.025	-0.12973	0.008	3e-05	status=JK
sgs1	sgs1	YJR120W	YJR120W		0.83219	0.252	0.96189	0.025	-0.12584	0.252	0.00706
sgs1	sgs1	YMR027W	YMR027W		0.93505	0.02	1.05568	0.015	-0.12515	0.02	0
sgs1	sgs1	YOL013C	HRD1		0.94095	0.156	1.06392	0.033	-0.12514	0.156	0.00122
sgs1	sgs1	YBR103W	SIF2		0.83726	0.006	0.95962	0.011	-0.12381	0.006	0
sgs1	sgs1	YKR065C	PAM17		0.8255	0.095	0.94933	0.037	-0.12378	0.095	0.00042
sgs1	sgs1	YPR197C	YPR197C		0.93332	0.05	1.05085	0.009	-0.12364	0.05	4e-05
sgs1	sgs1	YDL162C	YDL162C		0.84573	0.025	0.97106	0.003	-0.12363	0.025	1e-05
sgs1	sgs1	YOL006C	TOP1		0.71162	0.024	0.83074	0.02	-0.12361	0.024	1e-05
sgs1	sgs1	YIL040W	APQ12		0.31048	0.065	0.43455	0.071	-0.12357	0.065	0.01442	status=JK
sgs1	sgs1	YML095C	RAD10		0.89446	0.009	1.01349	0.017	-0.12299	0.009	4e-05	status=JK
sgs1	sgs1	YDR536W	STL1		0.90018	0.019	1.01997	0.018	-0.12223	0.019	0.00016	status=JK
sgs1	sgs1	YJL207C	LAA1		0.87541	0.004	0.99679	0.023	-0.12141	0.004	1e-05	status=JK
sgs1	sgs1	YDR363W	ESC2		0.83148	0.04	0.95205	0.008	-0.11906	0.04	3e-05
sgs1	sgs1	YLR394W	CST9		1.00986	0.074	1.1199	0.019	-0.11758	0.074	0.00011
sgs1	sgs1	YHR077C	NMD2		0.93277	0.003	1.04224	0.044	-0.11683	0.003	0	status=JK
sgs1	sgs1	YGR111W	YGR111W		0.9445	0.036	1.06595	0.031	-0.11582	0.036	2e-05
sgs1	sgs1	YOL012C	HTZ1		0.79705	0.01	0.91475	0.013	-0.11498	0.01	0
sgs1	sgs1	YPR050C	YPR050C		0.89383	0.074	1.00957	0.037	-0.11474	0.074	0.00016
sgs1	sgs1	YER117W	RPL23B		0.85531	0.065	0.96817	0.024	-0.11414	0.065	0.00012
sgs1	sgs1	YHR125W	YHR125W		0.86567	0.004	0.97608	0.023	-0.11393	0.004	1e-05	status=JK
sgs1	sgs1	YJL106W	IME2		0.89489	0.033	1.00763	0.003	-0.11365	0.033	1e-05
sgs1	sgs1	YPL157W	TGS1		0.83252	0.005	0.93568	0.03	-0.11279	0.005	1e-05	status=JK
sgs1	sgs1	YKR007W	MEH1		0.83374	0.044	0.95043	0.022	-0.11278	0.044	4e-05
sgs1	sgs1	YKR029C	SET3		0.90794	0.004	1.01958	0.011	-0.11194	0.004	0
sgs1	sgs1	YBR168W	PEX32		0.80054	0.079	0.90946	0.012	-0.11029	0.079	0.00026
sgs1	sgs1	YNR007C	ATG3		0.8937	0.017	1.00597	0.006	-0.11015	0.017	0.00012	status=JK
sgs1	sgs1	YHR047C	AAP1		0.93442	0.071	1.04185	0.027	-0.10954	0.071	0.00012
sgs1	sgs1	YGL066W	SGF73		0.65145	0.009	0.76047	0.009	-0.10913	0.009	7e-05	status=JK
sgs1	sgs1	YHR067W	HTD2		0.57486	0.06	0.68745	0.033	-0.10835	0.06	0.00031
sgs1	sgs1	YBL015W	ACH1		0.97691	0.163	1.07324	0.042	-0.10789	0.163	0.00124
sgs1	sgs1	YER161C	SPT2		0.83864	0.034	0.94098	0.021	-0.10696	0.034	2e-05
sgs1	sgs1	YML041C	VPS71		0.82636	0.115	0.94251	0.047	-0.10693	0.115	0.00072
sgs1	sgs1	YKR082W	NUP133		0.79986	0.086	0.90676	0.008	-0.10671	0.086	0.00034
sgs1	sgs1	YCR071C	IMG2		0.6433	0.028	0.75237	0.006	-0.10659	0.028	2e-05
sgs1	sgs1	YNL130C	CPT1		0.97253	0.054	1.07921	0.028	-0.10642	0.054	5e-05
sgs1	sgs1	YOR094W	ARF3		0.88384	0.046	0.99166	0.005	-0.10634	0.046	4e-05
sgs1	sgs1	YKR036C	CAF4		0.88073	0.048	0.9872	0.016	-0.10626	0.047	4e-05
sgs1	sgs1	YLR055C	SPT8		0.85264	0.002	0.9533	0.03	-0.10622	0.002	0	status=JK
sgs1	sgs1	YIL060W	YIL060W		0.92942	0.019	1.034	0.03	-0.10599	0.019	0.00014	status=JK
sgs1	sgs1	YLR346C	YLR346C		0.93761	0.095	1.03821	0.026	-0.10482	0.095	0.00029
sgs1	sgs1	YDR334W	SWR1		0.84671	0.028	0.95143	0.046	-0.10453	0.028	1e-05
sgs1	sgs1	YGL036W	YGL036W		0.95791	0.028	1.06015	0.031	-0.10444	0.028	0.00028	status=JK
sgs1	sgs1	YOR024W	YOR024W		0.86202	0.024	0.96358	0.013	-0.10434	0.024	1e-05
sgs1	sgs1	YOR017W	PET127		0.57137	0.042	0.67258	0.019	-0.10307	0.042	0.00011
sgs1	sgs1	YKL053C-A	MDM35		0.70977	0.049	0.80065	0.045	-0.10267	0.049	9e-05
sgs1	sgs1	YKR028W	SAP190		0.88788	0.07	0.97532	0.051	-0.10234	0.07	0.00013
sgs1	sgs1	YDL074C	BRE1		0.62628	0.016	0.72797	0.011	-0.10124	0.016	0.00022	status=JK
sgs1	sgs1	YHR167W	THP2		0.90838	0.169	1.01075	0.017	-0.10118	0.169	0.00172
sgs1	sgs1	YDR073W	SNF11		0.88128	0.01	0.97804	0.019	-0.10093	0.01	4e-05	status=JK
sgs1	sgs1	YGR054W	YGR054W		0.94997	0.062	1.04632	0.005	-0.09794	0.062	8e-05
sgs1	sgs1	YBR246W	RRT2		0.86907	0.005	0.96582	0.005	-0.09769	0.005	1e-05	status=JK
sgs1	sgs1	YJL124C	LSM1		0.80923	0.027	0.90792	0.012	-0.09739	0.027	1e-05
sgs1	sgs1	YDR019C	GCV1		0.91819	0.155	1.00545	0.055	-0.09624	0.155	0.00129
sgs1	sgs1	YLR428C	YLR428C		0.97799	0.018	1.06012	0.047	-0.09608	0.018	0.00011	status=JK
sgs1	sgs1	YJR059W	PTK2		0.90468	0.008	1.0036	0.013	-0.09585	0.008	2e-05	status=JK
sgs1	sgs1	YMR055C	BUB2		0.93475	0.115	1.0314	0.02	-0.09534	0.115	0.0005
sgs1	sgs1	YDR532C	KRE28		0.4096	0.051	0.50411	0.016	-0.09496	0.051	0.00052
sgs1	sgs1	YKR097W	PCK1		0.90485	0.081	0.99216	0.058	-0.09476	0.081	0.00268	status=JK
sgs1	sgs1	YBL072C	RPS8A		0.59965	0.161	0.69863	0.028	-0.09313	0.161	0.00498
sgs1	sgs1	YIL079C	AIR1		0.90104	0.059	0.9985	0.015	-0.09221	0.059	8e-05
sgs1	sgs1	YJL077C	ICS3		0.91714	0.071	1.00802	0.005	-0.09213	0.07	0.00012
sgs1	sgs1	YIL052C	RPL34B		0.92725	0.029	1.01595	0.015	-0.09188	0.029	1e-05
sgs1	sgs1	YOR196C	LIP5		0.66962	0.014	0.76906	0.03	-0.09185	0.014	0.00014	status=JK
sgs1	sgs1	YPL125W	KAP120		0.87845	0.059	0.96296	0.03	-0.0916	0.059	8e-05
sgs1	sgs1	YMR039C	SUB1		0.7467	0.027	0.82641	0.045	-0.09117	0.027	1e-05
sgs1	sgs1	YHR014W	SPO13		0.84533	0.006	0.93579	0.032	-0.09094	0.006	2e-05	status=JK
sgs1	sgs1	YGL250W	RMR1		0.87947	0.015	0.96974	0.047	-0.09091	0.015	0
sgs1	sgs1	YMR060C	SAM37		0.92024	0.064	1.0076	0.005	-0.08992	0.064	9e-05
sgs1	sgs1	YPR191W	QCR2		0.83312	0.124	0.91831	0.054	-0.08923	0.124	0.0009
sgs1	sgs1	YBR223C	TDP1		0.90461	0.009	0.98981	0.039	-0.08837	0.009	3e-05	status=JK
sgs1	sgs1	YCL026C-A	FRM2		0.9151	0.08	1.00228	0.029	-0.08809	0.08	0.00019
sgs1	sgs1	YML013W	UBX2		0.91926	0.018	1.00932	0.017	-0.08744	0.018	0.00013	status=JK
sgs1	sgs1	YBR076W	ECM8		0.83498	0.065	0.92498	0.011	-0.08724	0.065	0.00013
sgs1	sgs1	YPR083W	MDM36		0.96613	0.038	1.04448	0.024	-0.08724	0.038	2e-05
sgs1	sgs1	YGL215W	CLG1		0.94975	0.077	1.03067	0.025	-0.08716	0.077	0.00015
sgs1	sgs1	YBR137W	YBR137W		0.77197	0.021	0.86136	0.017	-0.08684	0.021	1e-05
sgs1	sgs1	YPR185W	ATG13		0.89137	0.046	0.97463	0.016	-0.08663	0.046	4e-05
sgs1	sgs1	YBR213W	MET8		0.91798	0.071	0.99874	0.055	-0.08659	0.071	0.00013
sgs1	sgs1	YLR426W	TDA5		0.8985	0.027	0.9847	0.014	-0.08651	0.027	1e-05
sgs1	sgs1	YML070W	DAK1		0.89887	0.149	0.94325	0.151	-0.08646	0.149	0.00122
sgs1	sgs1	YBR093C	PHO5		0.84779	0.08	0.93612	0.013	-0.08633	0.08	0.00023
sgs1	sgs1	YER119C-A	YER119C-A		0.87319	0.023	0.96022	0.003	-0.0855	0.023	1e-05
sgs1	sgs1	YPL069C	BTS1		0.44932	0.009	0.53706	0.018	-0.0853	0.009	0.00014	status=JK
sgs1	sgs1	YPR106W	ISR1		0.97976	0.023	1.06112	0.005	-0.0852	0.023	0.00019	status=JK
sgs1	sgs1	YKL114C	APN1		0.92337	0.041	1.01042	0.016	-0.08458	0.041	2e-05
sgs1	sgs1	YOR297C	TIM18		0.90096	0.026	0.9854	0.022	-0.08455	0.026	1e-05
sgs1	sgs1	YNL050C	YNL050C		0.93685	0.016	1.02017	0.011	-0.08405	0.016	0.0001	status=JK
sgs1	sgs1	YKR057W	RPS21A		0.74306	0.061	0.8242	0.022	-0.08392	0.061	0.00015
sgs1	sgs1	YOL041C	NOP12		0.56717	0.036	0.64846	0.008	-0.08388	0.036	7e-05
sgs1	sgs1	YLR420W	URA4		0.93128	0.017	1.01746	0.014	-0.08382	0.017	0.00011	status=JK
sgs1	sgs1	YOL124C	TRM11		0.89266	0.007	0.97264	0.022	-0.08335	0.007	2e-05	status=JK
sgs1	sgs1	YKL207W	EMC3		0.97057	0.012	1.05392	0.003	-0.08313	0.012	5e-05	status=JK
sgs1	sgs1	YHL003C	LAG1		0.89336	0.093	0.97464	0.009	-0.08225	0.093	0.00031
sgs1	sgs1	YMR080C	NAM7		1.02039	0.013	1.10463	0.031	-0.08224	0.013	0
sgs1	sgs1	YML035C-A	YML035C-A		0.93354	0.033	1.01362	0.014	-0.08224	0.033	1e-05
sgs1	sgs1	YOR182C	RPS30B		0.69332	0.033	0.76823	0.057	-0.08184	0.033	3e-05
sgs1	sgs1	YKR088C	TVP38		0.96007	0.008	1.0425	0.007	-0.08175	0.008	2e-05	status=JK
sgs1	sgs1	YDL113C	ATG20		0.92377	0.051	1.0078	0.005	-0.08173	0.051	5e-05
sgs1	sgs1	YMR307W	GAS1		0.94206	0.039	1.02945	0.026	-0.0816	0.039	2e-05
sgs1	sgs1	YLR015W	BRE2		0.75648	0.031	0.84026	0.019	-0.08144	0.031	2e-05
sgs1	sgs1	YAR028W	YAR028W		0.94157	0.013	1.01239	0.031	-0.08128	0.013	7e-05	status=JK
sgs1	sgs1	YGR270W	YTA7		0.74118	0.141	0.82089	0.006	-0.08098	0.14	0.00182
sgs1	sgs1	YHR061C	GIC1		0.62571	0.136	0.69956	0.259	-0.08049	0.136	0.00271
sgs1	sgs1	YJR054W	KCH1		0.54626	0.228	0.68312	0.335	-0.08005	0.228	0.01721
sgs1	sgs1	YLR319C	BUD6		1.06991	0.031	0.98696	0.021	0.08005	0.031	1e-05
sgs1	sgs1	YBL079W	NUP170		0.80376	0.039	0.72512	0.015	0.08011	0.039	3e-05
sgs1	sgs1	YGL090W	LIF1		1.06514	0.056	0.98657	0.019	0.08043	0.056	4e-05
sgs1	sgs1	YLR388W	RPS29A		0.90482	0.018	0.82435	0.026	0.08044	0.018	0.00013	status=JK
sgs1	sgs1	YIL166C	YIL166C		1.03694	0.021	0.95977	0.007	0.08048	0.021	0.00013	status=JK
sgs1	sgs1	YLR434C	YLR434C		1.08356	0.05	1.0011	0.012	0.0807	0.05	3e-05
sgs1	sgs1	YGL124C	MON1		0.83629	0.03	0.75451	0.017	0.08111	0.03	1e-05
sgs1	sgs1	YCL044C	MGR1		1.04999	0.053	0.97235	0.019	0.08118	0.053	4e-05
sgs1	sgs1	YDR146C	SWI5		1.11241	0.053	1.02941	0.043	0.08126	0.053	3e-05
sgs1	sgs1	YIL025C	YIL025C		1.08811	0.022	1.00636	0.015	0.08131	0.022	0.00013	status=JK
sgs1	sgs1	YHR162W	MPC2		1.13083	0.044	1.04237	0.041	0.0815	0.044	2e-05
sgs1	sgs1	YLR038C	COX12		0.99956	0.015	0.91725	0.022	0.08153	0.015	7e-05	status=JK
sgs1	sgs1	YHR202W	YHR202W		1.11098	0.063	1.0314	0.016	0.08153	0.063	5e-05
sgs1	sgs1	YKL171W	NNK1		1.05942	0.057	0.97457	0.013	0.08156	0.057	4e-05
sgs1	sgs1	YDL002C	NHP10		0.7963	0.012	0.71719	0.022	0.08163	0.012	0
sgs1	sgs1	YML038C	YMD8		0.85666	0.054	0.76246	0.032	0.08234	0.054	7e-05
sgs1	sgs1	YHR206W	SKN7		1.07705	0.017	0.99413	0.004	0.08242	0.017	0
sgs1	sgs1	YGL114W	YGL114W		0.75346	0.048	0.67289	0.015	0.08271	0.048	7e-05
sgs1	sgs1	YHR049W	FSH1		1.06143	0.073	0.98383	0.023	0.08319	0.073	9e-05
sgs1	sgs1	YCR068W	ATG15		0.93509	0.005	0.85318	0.024	0.08441	0.005	1e-05	status=JK
sgs1	sgs1	YJL037W	IRC18		1.02207	0.061	0.94726	0.043	0.08441	0.061	6e-05
sgs1	sgs1	YMR021C	MAC1		0.98146	0.037	0.89824	0.046	0.08516	0.037	1e-05
sgs1	sgs1	YKL213C	DOA1		0.98684	0.02	0.89767	0.01	0.08653	0.02	0
sgs1	sgs1	YJR066W	TOR1		1.07857	0.041	0.99328	0.029	0.08653	0.041	2e-05
sgs1	sgs1	YBR131W	CCZ1		0.83291	0.033	0.75961	0.062	0.08658	0.033	0.00052	status=JK
sgs1	sgs1	YIL053W	RHR2		1.05133	0.049	0.96817	0.031	0.0866	0.049	3e-05
sgs1	sgs1	YOR030W	DFG16		0.96423	0.04	0.89258	0.057	0.08666	0.04	0.00058	status=JK
sgs1	sgs1	YHL005C	YHL005C		1.088	0.025	0.99715	0.019	0.08668	0.025	0.00018	status=JK
sgs1	sgs1	YPL179W	PPQ1		1.06585	0.028	0.9791	0.008	0.08673	0.028	1e-05
sgs1	sgs1	YGL253W	HXK2		0.98567	0.04	0.9048	0.021	0.08698	0.04	2e-05
sgs1	sgs1	YPL250C	ICY2		0.90764	0.001	0.82184	0.027	0.0871	0.001	0	status=JK
sgs1	sgs1	YBR071W	YBR071W		1.06646	0.033	0.97491	0.03	0.08711	0.033	1e-05
sgs1	sgs1	YML128C	MSC1		1.05522	0.01	0.96471	0.032	0.08743	0.01	0
sgs1	sgs1	YOR043W	WHI2		1.08891	0.035	1.00238	0.011	0.0877	0.035	1e-05
sgs1	sgs1	YBR261C	TAE1		1.06287	0.062	0.9753	0.004	0.08793	0.062	5e-05
sgs1	sgs1	YLR393W	ATP10		1.00181	0.022	0.91445	0.002	0.08799	0.022	0
sgs1	sgs1	YGR200C	ELP2		0.91752	0.02	0.83051	0.005	0.08823	0.02	0.00016	status=JK
sgs1	sgs1	YKL043W	PHD1		1.12556	0.037	1.03841	0.013	0.08823	0.037	1e-05
sgs1	sgs1	YNL089C	YNL089C		1.07083	0.018	0.97977	0.009	0.08905	0.018	9e-05	status=JK
sgs1	sgs1	YGR027C	RPS25A		0.96271	0.023	0.87441	0.014	0.08949	0.023	0.00019	status=JK
sgs1	sgs1	YLR435W	TSR2		0.80227	0.038	0.70886	0.005	0.08952	0.038	3e-05
sgs1	sgs1	YML030W	RCF1		1.07889	0.064	0.98935	0.015	0.08974	0.064	6e-05
sgs1	sgs1	YBR240C	THI2		1.09987	0.019	1.00986	0.008	0.09004	0.019	0
sgs1	sgs1	YGR205W	TDA10		1.11866	0.041	1.02733	0.006	0.09038	0.041	1e-05
sgs1	sgs1	YGR077C	PEX8		0.99657	0.016	0.89628	0.043	0.09055	0.016	0
sgs1	sgs1	YKR034W	DAL80		1.11856	0.027	1.03042	0.019	0.09074	0.027	0
sgs1	sgs1	YNL095C	YNL095C		1.09266	0.049	0.99663	0.023	0.09081	0.049	2e-05
sgs1	sgs1	YOL085C	YOL085C		1.07247	0.06	0.97882	0.044	0.09136	0.06	0.00105	status=JK
sgs1	sgs1	YKL098W	MTC2		1.11805	0.025	1.02546	0.003	0.09185	0.025	0
sgs1	sgs1	YPL213W	LEA1		0.8475	0.034	0.75206	0.032	0.09218	0.034	2e-05
sgs1	sgs1	YLR142W	PUT1		1.10602	0.012	1.01808	0.028	0.09233	0.012	4e-05	status=JK
sgs1	sgs1	YDR092W	UBC13		1.09929	0.025	1.00718	0.008	0.09243	0.025	0
sgs1	sgs1	YLR065C	ENV10		0.93179	0.032	0.83709	0.018	0.09255	0.032	1e-05
sgs1	sgs1	YGR244C	LSC2		1.14889	0.008	1.05584	0.007	0.0929	0.008	2e-05	status=JK
sgs1	sgs1	YBR266C	YBR266C		0.86154	0.043	0.76881	0.001	0.0933	0.043	4e-05
sgs1	sgs1	YCR105W	ADH7		0.76247	0.03	0.66573	0.026	0.09355	0.03	2e-05
sgs1	sgs1	YPL008W	CHL1		1.07608	0.019	0.97713	0.015	0.09427	0.019	0
sgs1	sgs1	YML022W	APT1		1.08143	0.086	0.98553	0.027	0.09439	0.086	0.00014
sgs1	sgs1	YBL081W	YBL081W		1.07282	0.004	0.97391	0.037	0.09482	0.004	0	status=JK
sgs1	sgs1	YHL031C	GOS1		0.82616	0.119	0.72454	0.032	0.0949	0.119	0.00081
sgs1	sgs1	YPR179C	HDA3		0.93786	0.037	0.84378	0.017	0.0954	0.037	2e-05
sgs1	sgs1	YKL167C	MRP49		1.09972	0.012	1.00682	0.02	0.09582	0.012	4e-05	status=JK
sgs1	sgs1	YHR181W	SVP26		1.0983	0.093	1.00119	0.004	0.09595	0.093	0.00016
sgs1	sgs1	YJR130C	STR2		1.11419	0.024	1.01746	0.015	0.09607	0.024	0
sgs1	sgs1	YBR165W	UBS1		0.73819	0.017	0.63959	0.005	0.09719	0.017	0.00017	status=JK
sgs1	sgs1	YER095W	RAD51		1.03437	0.031	0.93243	0.052	0.09821	0.031	0.00029	status=JK
sgs1	sgs1	YDR076W	RAD55		0.98576	0.03	0.89365	0.019	0.09836	0.03	1e-05
sgs1	sgs1	YJR118C	ILM1		0.70773	0.014	0.60784	0.04	0.09922	0.014	0.00013	status=JK
sgs1	sgs1	YBL051C	PIN4		1.03091	0.017	0.93127	0.007	0.1	0.017	9e-05	status=JK
sgs1	sgs1	YAR037W	YAR037W		1.10119	0.04	1.00512	0.032	0.10001	0.04	1e-05
sgs1	sgs1	YFR009W	GCN20		1.03304	0.044	0.93172	0.004	0.10063	0.044	2e-05
sgs1	sgs1	YHR050W	SMF2		1.04301	0.06	0.94322	0.014	0.10064	0.06	5e-05
sgs1	sgs1	YOR085W	OST3		1.05356	0.029	0.9471	0.014	0.10136	0.029	1e-05
sgs1	sgs1	YDR109C	YDR109C		1.16037	0.025	1.05744	0.004	0.10139	0.025	0
sgs1	sgs1	YGR019W	UGA1		0.275	0.055	0.17976	0.136	0.10183	0.055	0.00215
sgs1	sgs1	YCR086W	CSM1		0.99534	0.032	0.89412	0.007	0.10184	0.032	1e-05
sgs1	sgs1	YGR170W	PSD2		1.10647	0.012	1.0001	0.039	0.10214	0.012	4e-05	status=JK
sgs1	sgs1	YPL048W	CAM1		0.65908	0.079	0.54744	0.037	0.10232	0.079	0.00047
sgs1	sgs1	YFR010W	UBP6		0.91439	0.029	0.81095	0.003	0.10258	0.029	1e-05
sgs1	sgs1	YPL079W	RPL21B		1.02752	0.014	0.92707	0.009	0.1028	0.014	0
sgs1	sgs1	YIL007C	NAS2		1.08653	0.021	0.98456	0.009	0.10327	0.021	0
sgs1	sgs1	YHR025W	THR1		0.79065	0.037	0.68391	0.024	0.10335	0.037	3e-05
sgs1	sgs1	YGR237C	YGR237C		0.54881	0.047	0.44369	0.027	0.10337	0.047	0.00017
sgs1	sgs1	YJL089W	SIP4		1.14941	0.016	1.04885	0.014	0.10383	0.016	0
sgs1	sgs1	YMR065W	KAR5		0.68933	0.133	0.58027	0.039	0.10446	0.133	0.00191
sgs1	sgs1	YKL212W	SAC1		0.51832	0.096	0.41571	0.014	0.10457	0.096	0.0017
sgs1	sgs1	YHL033C	RPL8A		1.05387	0.03	0.94746	0.011	0.10578	0.03	1e-05
sgs1	sgs1	YMR011W	HXT2		0.60886	0.096	0.50119	0.003	0.10599	0.096	0.00105
sgs1	sgs1	YDR216W	ADR1		1.10378	0.014	0.99586	0.018	0.10669	0.014	0
sgs1	sgs1	YBR200W	BEM1		0.67705	0.276	0.53533	0.43	0.10907	0.276	0.01623
sgs1	sgs1	YGR268C	HUA1		1.11613	0.066	1.00981	0.018	0.10964	0.066	6e-05
sgs1	sgs1	YHR200W	RPN10		0.99662	0.069	0.89116	0.024	0.10995	0.069	9e-05
sgs1	sgs1	YOL064C	MET22		0.87949	0.014	0.76872	0.003	0.11079	0.014	9e-05	status=JK
sgs1	sgs1	YML029W	USA1		1.18281	0.038	1.06794	0.007	0.11097	0.038	0.00034	status=JK
sgs1	sgs1	YGL174W	BUD13		0.9551	0.06	0.84883	0.025	0.11103	0.06	7e-05
sgs1	sgs1	YBL088C	TEL1		0.99188	0.031	0.8873	0.034	0.11103	0.031	1e-05
sgs1	sgs1	YLR338W	YLR338W		0.98407	0.038	0.87346	0.016	0.11193	0.038	2e-05
sgs1	sgs1	YBL087C	RPL23A		0.95593	0.009	0.82813	0.052	0.11195	0.009	3e-05	status=JK
sgs1	sgs1	YKL030W	YKL030W		1.06764	0.015	0.95786	0.018	0.11196	0.015	0
sgs1	sgs1	YLL049W	LDB18		1.07258	0.023	0.96787	0.03	0.11266	0.023	0
sgs1	sgs1	YHR030C	SLT2		0.98147	0.007	0.86807	0.007	0.1131	0.007	0
sgs1	sgs1	YJL117W	PHO86		1.04073	0.045	0.92936	0.02	0.11324	0.045	2e-05
sgs1	sgs1	YGR105W	VMA21		0.90162	0.019	0.78635	0.003	0.11447	0.019	0
sgs1	sgs1	YBR132C	AGP2		1.09364	0.034	0.98546	0.056	0.11494	0.034	1e-05
sgs1	sgs1	YER162C	RAD4		0.44964	0.099	0.34829	0.063	0.11561	0.099	0.01589	status=JK
sgs1	sgs1	YHR015W	MIP6		1.15626	0.008	1.0449	0.021	0.11568	0.008	1e-05	status=JK
sgs1	sgs1	YNL135C	FPR1		1.05267	0.049	0.93165	0.04	0.11625	0.049	3e-05
sgs1	sgs1	YJL191W	RPS14B		1.10801	0.074	0.99657	0.012	0.11625	0.074	8e-05
sgs1	sgs1	YJL217W	REE1		1.12838	0.013	1.01626	0.032	0.11673	0.013	4e-05	status=JK
sgs1	sgs1	YDR378C	LSM6		0.8304	0.018	0.71262	0.001	0.11762	0.018	0
sgs1	sgs1	YKR059W	TIF1		0.93892	0.025	0.81644	0.027	0.11782	0.025	0.00024	status=JK
sgs1	sgs1	YNL153C	GIM3		0.88959	0.021	0.76947	0.02	0.11821	0.021	0
sgs1	sgs1	YGR037C	ACB1		0.68571	0.014	0.57123	0.014	0.11823	0.014	0
sgs1	sgs1	YGL198W	YIP4		0.88974	0.019	0.77284	0.024	0.11823	0.019	0.00015	status=JK
sgs1	sgs1	YBR016W	YBR016W		0.69344	0.026	0.57123	0.046	0.11922	0.026	1e-05
sgs1	sgs1	YLR200W	YKE2		1.17492	0.041	1.05184	0.005	0.12081	0.041	1e-05
sgs1	sgs1	YHR152W	SPO12		1.15522	0.016	1.03772	0.013	0.1233	0.016	7e-05	status=JK
sgs1	sgs1	YCR034W	FEN1		1.0724	0.012	0.94654	0.017	0.12379	0.012	4e-05	status=JK
sgs1	sgs1	YHR035W	YHR035W		1.14261	0.03	1.01943	0.012	0.12431	0.03	0
sgs1	sgs1	YNR020C	ATP23		0.97957	0.032	0.85075	0.023	0.12581	0.031	1e-05
sgs1	sgs1	YOL037C	YOL037C		0.96892	0.039	0.82787	0.032	0.1264	0.039	0.00053	status=JK
sgs1	sgs1	YNL080C	EOS1		0.71821	0.088	0.59062	0.03	0.12661	0.088	0.00051
sgs1	sgs1	YGL087C	MMS2		1.19441	0.04	1.06962	0.044	0.12698	0.04	1e-05
sgs1	sgs1	YDR004W	RAD57		1.00619	0.016	0.87001	0.043	0.1279	0.016	0
sgs1	sgs1	YHR180W	YHR180W		0.6054	0.091	0.47337	0.003	0.13172	0.091	0.00091
sgs1	sgs1	YHL041W	YHL041W		1.13113	0.005	0.9966	0.011	0.13231	0.005	1e-05	status=JK
sgs1	sgs1	YGL160W	AIM14		0.71833	0.047	0.56739	0.082	0.13261	0.047	0.00145	status=JK
sgs1	sgs1	YIL132C	CSM2		1.14359	0.035	1.00654	0.02	0.13318	0.035	1e-05
sgs1	sgs1	YCR062W	YCR062W		1.1815	0.005	1.04801	0.004	0.13402	0.005	1e-05	status=JK
sgs1	sgs1	YBR134W	YBR134W		1.11235	0.042	0.98031	0.018	0.13531	0.042	1e-05
sgs1	sgs1	YHL025W	SNF6		0.8738	0.038	0.7442	0.041	0.13602	0.038	2e-05
sgs1	sgs1	YMR063W	RIM9		1.01492	0.017	0.88089	0.027	0.13674	0.017	0.0001	status=JK
sgs1	sgs1	YHL023C	NPR3		0.98679	0.031	0.85295	0.021	0.13725	0.031	1e-05
sgs1	sgs1	YOR014W	RTS1		1.03305	0.06	0.89227	0.007	0.1415	0.059	5e-05
sgs1	sgs1	YLR376C	PSY3		1.12212	0.023	0.97994	0.006	0.14219	0.023	0
sgs1	sgs1	YGR068C	ART5		1.09154	0.01	0.9541	0.017	0.14233	0.01	3e-05	status=JK
sgs1	sgs1	YOR245C	DGA1		0.61642	0.035	0.49254	0.087	0.14448	0.035	5e-05
sgs1	sgs1	YOR333C	YOR333C		1.09435	0.047	0.9478	0.004	0.14593	0.047	2e-05
sgs1	sgs1	YDR513W	GRX2		0.82704	0.059	0.68918	0.071	0.14744	0.059	0.0001
sgs1	sgs1	YHR045W	YHR045W		1.16839	0.1	1.01935	0.005	0.14788	0.1	0.00017
sgs1	sgs1	YLR084C	RAX2		1.06418	0.156	0.93291	0.089	0.14886	0.156	0.00086
sgs1	sgs1	YLR180W	SAM1		1.07632	0.013	0.90647	0.064	0.15077	0.013	5e-05	status=JK
sgs1	sgs1	YIL010W	DOT5		1.18273	0.092	1.02658	0.003	0.15477	0.092	0.00013
sgs1	sgs1	YOR300W	YOR300W		0.59679	0.022	0.44962	0.042	0.15599	0.022	1e-05
sgs1	sgs1	YGR184C	UBR1		1.12821	0.06	0.96636	0.027	0.15669	0.06	4e-05
sgs1	sgs1	YGL149W	YGL149W		1.05122	0.009	0.89315	0.013	0.15984	0.009	3e-05	status=JK
sgs1	sgs1	YNL141W	AAH1		0.85819	0.071	0.70293	0.023	0.1604	0.071	0.00016
sgs1	sgs1	YOR358W	HAP5		1.099	0.094	0.91263	0.142	0.16048	0.094	0.00244	status=JK
sgs1	sgs1	YGR226C	YGR226C		1.16538	0.024	0.99203	0.001	0.17284	0.024	0.00015	status=JK
sgs1	sgs1	YOR106W	VAM3		0.85514	0.051	0.67378	0.063	0.17416	0.051	6e-05
sgs1	sgs1	YGR221C	TOS2		1.17662	0.025	1.00106	0.018	0.17424	0.025	0.00015	status=JK
sgs1	sgs1	YOR293W	RPS10A		0.84838	0.029	0.67226	0.013	0.17598	0.029	1e-05
sgs1	sgs1	YBR122C	MRPL36		1.19112	0.042	1.01582	0.004	0.17729	0.042	1e-05
sgs1	sgs1	YGL024W	YGL024W		0.59397	0.049	0.40269	0.053	0.1822	0.049	0.00015
sgs1	sgs1	YBR189W	RPS9B		0.4644	0.156	0.27881	0.008	0.18298	0.156	0.0095
sgs1	sgs1	YGR166W	TRS65		1.14515	0.161	0.95947	0.012	0.18309	0.161	0.00075
sgs1	sgs1	YGL255W	ZRT1		1.02635	0.052	0.84171	0.012	0.18321	0.052	4e-05
sgs1	sgs1	YIL157C	COA1		1.14006	0.036	0.95465	0.014	0.1834	0.036	1e-05
sgs1	sgs1	YDL062W	YDL062W		1.07409	0.079	0.88076	0.019	0.19365	0.079	0.00011
sgs1	sgs1	YMR019W	STB4		1.07871	0.019	0.88244	0.022	0.19421	0.019	0.0001	status=JK
sgs1	sgs1	YFR047C	BNA6		0.86902	0.05	0.67109	0.018	0.1963	0.05	5e-05
sgs1	sgs1	YGL059W	PKP2		1.03095	0.078	0.83939	0.037	0.19926	0.078	0.00012
sgs1	sgs1	YNL046W	YNL046W		0.3843	0.232	0.14847	0.071	0.20352	0.232	0.04529
sgs1	sgs1	YIL027C	EMC5		1.20538	0.062	1.00151	0.025	0.20831	0.062	4e-05
sgs1	sgs1	YOR312C	RPL20B		1.02855	0.046	0.81807	0.039	0.21057	0.046	2e-05
sgs1	sgs1	YGL133W	ITC1		1.18855	0.038	0.95222	0.061	0.22089	0.038	0.00034	status=JK
sgs1	sgs1	YHL027W	RIM101		1.15657	0.024	0.91605	0.027	0.24268	0.024	0
sgs1	sgs1	YCR063W	BUD31		0.85483	0.009	0.61146	0.003	0.24477	0.009	4e-05	status=JK
sgs1	sgs1	YHR184W	SSP1		1.27	0.024	1.01115	0.014	0.26082	0.024	0.00012	status=JK
sgs1	sgs1	YGL163C	RAD54		1.11454	0.017	0.85347	0.039	0.26243	0.017	8e-05	status=JK
sgs1	sgs1	YGL214W	YGL214W		0.49477	0.151	0.17624	0.039	0.29933	0.151	0.00729
sgs1	sgs1	YHL006C	SHU1		1.30613	0.062	1.00023	0.005	0.30653	0.062	3e-05

## Sheet: Table S6
Query ORF	Query Name	Array ORF	Array Name	Array annotation	Normalized colony size (EXPERIMENT)	Normalized colony std. dev. (EXPERIMENT)	Normalized colony size (CONTROL)	Normalized colony std. dev. (CONTROL)	Score	Score stdev	p-Value	Additional information
hrq1	hrq1	YDR386W	MUS81		0.31216	0.033	1.01758	0.05	-0.70819	0.033	0.00033
hrq1	hrq1	YBR098W	MMS4		0.34058	0.054	0.98788	0.073	-0.65096	0.054	0.00107
hrq1	hrq1	YBR094W	PBY1		0.36882	0.056	1.00775	0.006	-0.63627	0.056	0.00097
hrq1	hrq1	YBR100W	YBR100W		0.30387	0.032	0.91943	0.006	-0.614	0.032	0.00031
hrq1	hrq1	YBR099C	YBR099C		0.39951	0.08	1.00608	0.026	-0.60772	0.08	0.0021
hrq1	hrq1	YML042W	CAT2		0.26306	0.102	0.83246	0.229	-0.60322	0.102	0.014
hrq1	hrq1	YBR228W	SLX1		0.44404	0.012	1.04613	0.021	-0.59682	0.012	0.00026	status=JK
hrq1	hrq1	YHR134W	WSS1		0.36897	0.046	0.92159	0.045	-0.54777	0.046	0.00052
hrq1	hrq1	YLR135W	SLX4		0.44644	0.018	0.97858	0.03	-0.53148	0.018	0.00051	status=JK
hrq1	hrq1	YJL092W	SRS2		0.44433	0.028	0.94058	0.026	-0.50014	0.028	7e-05
hrq1	hrq1	YMR282C	AEP2		0.52012	0.058	1.00449	0.015	-0.47931	0.058	0.00038
hrq1	hrq1	YGL175C	SAE2		0.52251	0.048	0.99669	0.012	-0.47576	0.048	0.00021
hrq1	hrq1	YHR031C	RRM3		0.51831	0.012	0.99428	0.035	-0.47435	0.012	0.00019	status=JK
hrq1	hrq1	YMR275C	BUL1		0.54048	0.054	1.01167	0.034	-0.47	0.054	0.00028
hrq1	hrq1	YMR280C	CAT8		0.46355	0.055	0.92843	0.007	-0.46781	0.055	0.00046
hrq1	hrq1	YMR031W-A	YMR031W-A		0.25225	0.083	0.68212	0.37	-0.46517	0.083	0.00896
hrq1	hrq1	YMR195W	ICY1		0.57702	0.092	1.02381	0.02	-0.45133	0.092	0.00108
hrq1	hrq1	YLR448W	RPL6B		0.36436	0.069	0.76106	0.209	-0.44204	0.069	0.01187	status=JK
hrq1	hrq1	YMR276W	DSK2		0.56413	0.061	1.00557	0.016	-0.44023	0.061	0.00035
hrq1	hrq1	YER116C	SLX8		0.2642	0.048	0.69712	0.023	-0.43826	0.048	0.00162
hrq1	hrq1	YMR283C	RIT1		0.65508	0.084	1.08757	0.004	-0.42948	0.084	0.00057
hrq1	hrq1	YER111C	SWI4		0.51227	0.041	0.94159	0.009	-0.4291	0.041	0.00014
hrq1	hrq1	YMR256C	COX7		0.63339	0.003	1.04594	0.021	-0.41243	0.003	1e-05	status=JK
hrq1	hrq1	YMR182C	RGM1		0.63004	0.016	1.03114	0.053	-0.40199	0.016	0.00021	status=JK
hrq1	hrq1	YGR097W	ASK10		0.30667	0.038	0.71242	0.026	-0.4002	0.037	0.00495	status=JK
hrq1	hrq1	YMR259C	TRM732		0.6043	0.081	1.0033	0.011	-0.3929	0.081	0.00066
hrq1	hrq1	YMR258C	ROY1		0.61981	0.111	1.0107	0.099	-0.38911	0.111	0.00154
hrq1	hrq1	YMR265C	YMR265C		0.66478	0.051	1.05229	0.07	-0.38612	0.051	0.00012
hrq1	hrq1	YMR194C-A	YMR194C-A		0.62873	0.063	1.01951	0.028	-0.38332	0.063	0.00027
hrq1	hrq1	YMR192W	GYL1		0.63984	0.035	1.02752	0.044	-0.38154	0.035	5e-05
hrq1	hrq1	YMR253C	YMR253C		0.66208	0.045	1.04931	0.014	-0.38087	0.045	8e-05
hrq1	hrq1	YMR196W	YMR196W		0.68629	0.103	1.04701	0.018	-0.36605	0.102	0.0009
hrq1	hrq1	YLR154C	RNH203		0.63934	0.053	1.0058	0.042	-0.36175	0.053	0.00016
hrq1	hrq1	YHR154W	RTT107		0.60639	0.048	0.96229	0.054	-0.36077	0.048	0.00211	status=JK
hrq1	hrq1	YMR204C	INP1		0.5166	0.277	0.86912	0.045	-0.34435	0.277	0.03354
hrq1	hrq1	YMR190C	SGS1		0.59967	0.034	0.93548	0.04	-0.34401	0.034	0.00106	status=JK
hrq1	hrq1	YOR144C	ELG1		0.59238	0.017	0.93661	0.039	-0.34246	0.017	0.00026	status=JK
hrq1	hrq1	YMR263W	SAP30		0.72196	0.032	1.06213	0.047	-0.33887	0.032	2e-05
hrq1	hrq1	YMR188C	MRPS17		0.6518	0.037	0.99489	0.031	-0.33667	0.037	5e-05
hrq1	hrq1	YMR262W	YMR262W		0.69511	0.057	1.02841	0.014	-0.3344	0.057	0.00015
hrq1	hrq1	YDL013W	SLX5		0.16581	0.033	0.48716	0.035	-0.33071	0.033	0.01287	status=JK
hrq1	hrq1	YBL072C	RPS8A		0.44534	0.229	0.75923	0.035	-0.32433	0.228	0.02999
hrq1	hrq1	YPR050C	YPR050C		0.59605	0.262	0.91199	0.048	-0.32319	0.262	0.01991
hrq1	hrq1	YCL061C	MRC1		0.64304	0.03	0.95593	0.01	-0.31482	0.03	0.0007	status=JK
hrq1	hrq1	YMR173W	DDR48		0.66553	0.023	0.97424	0.005	-0.30827	0.023	0.0004	status=JK
hrq1	hrq1	YMR181C	YMR181C		0.71596	0.008	1.02582	0.042	-0.30727	0.008	0
hrq1	hrq1	YMR194W	RPL36A		0.59153	0.023	0.89039	0.033	-0.30366	0.023	0.00053	status=JK
hrq1	hrq1	YMR251W-A	HOR7		0.586	0.042	0.8794	0.054	-0.30211	0.042	0.0001
hrq1	hrq1	YBR289W	SNF5		0.21839	0.017	0.50655	0.064	-0.29655	0.017	0.00014
hrq1	hrq1	YMR183C	SSO2		0.71026	0.007	1.00538	0.051	-0.29552	0.007	3e-05	status=JK
hrq1	hrq1	YMR189W	GCV2		0.70449	0.05	0.99689	0.003	-0.29246	0.049	0.0001
hrq1	hrq1	YKR016W	FCJ1		0.66358	0.135	0.95221	0.017	-0.28862	0.135	0.00222
hrq1	hrq1	YMR254C	YMR254C		0.68902	0.006	0.96716	0.051	-0.27468	0.006	3e-05	status=JK
hrq1	hrq1	YJL172W	CPS1		0.80049	0.316	1.07087	0.009	-0.27434	0.315	0.01481
hrq1	hrq1	YMR266W	RSN1		0.72538	0.047	0.99914	0.005	-0.27221	0.047	7e-05
hrq1	hrq1	YGL255W	ZRT1		0.66699	0.023	0.93498	0.043	-0.2707	0.023	0.00039	status=JK
hrq1	hrq1	YGL007W	YGL007W		0.56293	0.029	0.83687	0.051	-0.26899	0.029	0.00091	status=JK
hrq1	hrq1	YMR191W	SPG5		0.7876	0.048	1.05869	0.005	-0.26894	0.048	6e-05
hrq1	hrq1	YMR162C	DNF3		0.80154	0.044	1.06641	0.014	-0.26577	0.044	4e-05
hrq1	hrq1	YKR082W	NUP133		0.49604	0.131	0.77432	0.068	-0.26424	0.131	0.00475
hrq1	hrq1	YJR043C	POL32		0.6476	0.017	0.91502	0.017	-0.2635	0.017	1e-05
hrq1	hrq1	YMR187C	YMR187C		0.75012	0.008	1.00133	0.038	-0.26256	0.008	0
hrq1	hrq1	YJL183W	MNN11		0.66969	0.177	0.92759	0.163	-0.26124	0.176	0.02241	status=JK
hrq1	hrq1	YDL035C	GPR1		0.6151	0.358	0.82829	0.191	-0.25879	0.357	0.04123
hrq1	hrq1	YMR224C	MRE11		0.51104	0.077	0.76053	0.032	-0.25558	0.077	0.00093
hrq1	hrq1	YLR452C	SST2		0.57413	0.13	0.82139	0.051	-0.25463	0.13	0.00304
hrq1	hrq1	YMR186W	HSC82		0.73814	0.05	0.99762	0.029	-0.25436	0.05	8e-05
hrq1	hrq1	YML112W	CTK3		0.76291	0.35	1.01329	0.074	-0.25349	0.35	0.02235
hrq1	hrq1	YGL212W	VAM7		0.23253	0.068	0.56407	0.369	-0.24805	0.068	0.02712	status=JK
hrq1	hrq1	YLL041C	SDH2		0.25698	0.086	0.51896	0.208	-0.24557	0.086	0.03569	status=JK
hrq1	hrq1	YPL022W	RAD1		0.68478	0.034	0.90765	0.067	-0.24399	0.033	0.0008	status=JK
hrq1	hrq1	YMR179W	SPT21		0.53161	0.014	0.78764	0.078	-0.24362	0.014	0.00024	status=JK
hrq1	hrq1	YMR199W	CLN1		0.78675	0.082	1.02565	0.038	-0.24151	0.082	0.00031
hrq1	hrq1	YOR025W	HST3		0.78326	0.057	1.02278	0.039	-0.23952	0.057	0.00011
hrq1	hrq1	YMR269W	TMA23		0.54712	0.045	0.77965	0.037	-0.23294	0.045	0.00016
hrq1	hrq1	YBR093C	PHO5		0.69978	0.05	0.9307	0.017	-0.23131	0.05	0.0001
hrq1	hrq1	YMR202W	ERG2		0.53568	0.076	0.77448	0.057	-0.23056	0.076	0.00077
hrq1	hrq1	YBL031W	SHE1		0.22693	0.143	0.59598	0.559	-0.23011	0.142	0.04993
hrq1	hrq1	YDR186C	YDR186C		0.82249	0.108	1.0524	0.01	-0.23004	0.108	0.00061
hrq1	hrq1	YMR172W	HOT1		0.7977	0.104	1.01224	0.059	-0.22836	0.104	0.00061
hrq1	hrq1	YNL143C	YNL143C		0.79193	0.019	1.02221	0.012	-0.22724	0.019	0.0002	status=JK
hrq1	hrq1	YLR346C	YLR346C		0.78905	0.096	1.01101	0.056	-0.22662	0.096	0.00492	status=JK
hrq1	hrq1	YNR045W	PET494		0.81948	0.008	1.02946	0.014	-0.21687	0.008	3e-05	status=JK
hrq1	hrq1	YMR245W	YMR245W		0.73179	0.185	0.96248	0.09	-0.21546	0.185	0.00421
hrq1	hrq1	YMR177W	MMT1		0.83571	0.019	1.04898	0.007	-0.21409	0.019	0
hrq1	hrq1	YJR059W	PTK2		0.81365	0.005	1.02866	0.016	-0.21382	0.005	1e-05	status=JK
hrq1	hrq1	YBL079W	NUP170		0.57417	0.143	0.79017	0.08	-0.21279	0.143	0.00405
hrq1	hrq1	YMR300C	ADE4		0.87653	0.035	1.0887	0.005	-0.21236	0.035	2e-05
hrq1	hrq1	YMR250W	GAD1		0.70962	0.049	0.93472	0.045	-0.21088	0.049	9e-05
hrq1	hrq1	YKL113C	RAD27		0.65107	0.008	0.86131	0.002	-0.21052	0.008	5e-05	status=JK
hrq1	hrq1	YJL213W	YJL213W		0.68231	0.185	0.8556	0.112	-0.20946	0.185	0.00515
hrq1	hrq1	YIL161W	YIL161W		0.79502	0.155	1.01712	0.113	-0.2065	0.155	0.00197
hrq1	hrq1	YOR080W	DIA2		0.34304	0.048	0.54943	0.006	-0.20574	0.048	0.00073
hrq1	hrq1	YJR025C	BNA1		0.77177	0.027	0.97427	0.025	-0.20536	0.027	0.00039	status=JK
hrq1	hrq1	YKR097W	PCK1		0.78026	0.253	1.00307	0.037	-0.2038	0.253	0.0086
hrq1	hrq1	YER162C	RAD4		0.19622	0.093	0.48775	0.4	-0.20352	0.093	0.02443
hrq1	hrq1	YMR291W	TDA1		0.78501	0.136	0.99107	0.076	-0.20154	0.136	0.0014
hrq1	hrq1	YMR180C	CTL1		0.82854	0.119	1.0269	0.021	-0.20108	0.119	0.0008
hrq1	hrq1	YHR077C	NMD2		0.84735	0.046	1.04696	0.03	-0.1991	0.046	4e-05
hrq1	hrq1	YMR173W-A	YMR173W-A		0.82791	0.076	1.01589	0.039	-0.1968	0.076	0.00021
hrq1	hrq1	YCL060C	YCL060C		0.77095	0.056	0.98143	0.057	-0.19422	0.056	0.00011
hrq1	hrq1	YMR205C	PFK2		0.64707	0.172	0.81889	0.104	-0.19202	0.172	0.00485
hrq1	hrq1	YHR067W	HTD2		0.42694	0.098	0.61509	0.005	-0.19055	0.098	0.00316
hrq1	hrq1	YMR209C	YMR209C		0.82191	0.064	1.00993	0.041	-0.18894	0.064	0.00199	status=JK
hrq1	hrq1	YPR122W	AXL1		0.80749	0.405	0.99468	0.013	-0.18864	0.404	0.02819
hrq1	hrq1	YOL006C	TOP1		0.5691	0.084	0.74622	0.043	-0.18793	0.084	0.00088
hrq1	hrq1	YDR121W	DPB4		0.97809	0.037	1.16979	0.026	-0.18746	0.037	2e-05
hrq1	hrq1	YNL121C	TOM70		0.61854	0.38	0.75921	0.23	-0.18643	0.379	0.04719
hrq1	hrq1	YML041C	VPS71		0.77355	0.102	0.95604	0.089	-0.18252	0.102	0.00063
hrq1	hrq1	YMR169C	ALD3		0.85286	0.043	1.03762	0.035	-0.18101	0.043	0.00083	status=JK
hrq1	hrq1	YDL074C	BRE1		0.63431	0.059	0.81912	0.032	-0.18021	0.059	0.00022
hrq1	hrq1	YJL207C	LAA1		0.82639	0.051	1.0106	0.039	-0.17987	0.051	6e-05
hrq1	hrq1	YDR100W	TVP15		0.96689	0.024	1.14925	0.017	-0.17897	0.024	0.0002	status=JK
hrq1	hrq1	YDL185W	VMA1		0.85944	0.018	1.03663	0.018	-0.17688	0.018	0.00015	status=JK
hrq1	hrq1	YKL061W	BLI1		0.80579	0.18	0.99393	0.036	-0.17507	0.18	0.00295
hrq1	hrq1	YKR065C	PAM17		0.7882	0.303	0.98313	0.037	-0.17479	0.303	0.01377
hrq1	hrq1	YIL145C	PAN6		0.90469	0.016	1.07013	0.022	-0.17304	0.016	0.0001	status=JK
hrq1	hrq1	YDR465C	RMT2		0.83247	0.019	1.00438	0.027	-0.17282	0.019	0.00018	status=JK
hrq1	hrq1	YDR124W	YDR124W		1.0236	0.061	1.20441	0.043	-0.17232	0.061	6e-05
hrq1	hrq1	YJL049W	YJL049W		0.80087	0.018	0.97186	0.054	-0.1722	0.018	0.00016	status=JK
hrq1	hrq1	YML062C	MFT1		0.58373	0.066	0.75436	0.024	-0.17177	0.066	0.0004
hrq1	hrq1	YMR164C	MSS11		0.81073	0.046	0.98557	0.018	-0.17174	0.046	5e-05
hrq1	hrq1	YNL134C	YNL134C		0.84327	0.008	1.01725	0.023	-0.16891	0.008	0
hrq1	hrq1	YLR079W	SIC1		0.4841	0.058	0.65638	0.023	-0.16874	0.057	0.00046
hrq1	hrq1	YMR171C	EAR1		0.87848	0.147	1.04759	0.047	-0.16844	0.147	0.00127
hrq1	hrq1	YMR206W	YMR206W		0.84475	0.102	1.01687	0.021	-0.16843	0.102	0.00048
hrq1	hrq1	YMR176W	ECM5		0.82302	0.09	0.99568	0.009	-0.16822	0.09	0.00036
hrq1	hrq1	YJL079C	PRY1		0.88975	0.098	1.05047	0.026	-0.16599	0.098	0.00037
hrq1	hrq1	YDR120C	TRM1		0.96436	0.048	1.13338	0.045	-0.16434	0.048	3e-05
hrq1	hrq1	YMR153W	NUP53		0.85298	0.017	1.01564	0.038	-0.16295	0.017	0.00013	status=JK
hrq1	hrq1	YMR165C	PAH1		0.63645	0.146	0.83915	0.126	-0.16235	0.146	0.00319
hrq1	hrq1	YGR072W	UPF3		0.84317	0.03	0.99461	0.036	-0.1621	0.03	0.00042	status=JK
hrq1	hrq1	YDR127W	ARO1		0.8124	0.144	0.98744	0.028	-0.16127	0.144	0.0015
hrq1	hrq1	YDR098C	GRX3		0.98118	0.068	1.1453	0.051	-0.15991	0.068	9e-05
hrq1	hrq1	YDR122W	KIN1		1.03583	0.042	1.19897	0.014	-0.15939	0.042	2e-05
hrq1	hrq1	YJL047C	RTT101		0.79937	0.038	0.95176	0.012	-0.15741	0.038	3e-05
hrq1	hrq1	YLR418C	CDC73		0.83656	0.044	0.99898	0.036	-0.15621	0.044	4e-05
hrq1	hrq1	YCL016C	DCC1		0.75343	0.033	0.89737	0.045	-0.15484	0.033	2e-05
hrq1	hrq1	YMR147W	YMR147W		0.8885	0.098	1.04956	0.047	-0.15481	0.098	0.00037
hrq1	hrq1	YDR128W	MTC5		0.79495	0.026	0.94763	0.012	-0.15229	0.026	1e-05
hrq1	hrq1	YDR107C	TMN2		0.96364	0.056	1.10802	0.033	-0.15094	0.056	5e-05
hrq1	hrq1	YLR098C	CHA4		0.8135	0.243	0.96669	0.045	-0.15073	0.243	0.00677
hrq1	hrq1	YMR140W	SIP5		0.9192	0.061	1.06066	0.036	-0.14994	0.061	8e-05
hrq1	hrq1	YDR125C	ECM18		1.04204	0.025	1.1995	0.042	-0.149	0.025	0
hrq1	hrq1	YNR062C	YNR062C		0.83651	0.01	1.00037	0.068	-0.14836	0.01	5e-05	status=JK
hrq1	hrq1	YLR373C	VID22		0.71636	0.007	0.87112	0.033	-0.14749	0.007	3e-05	status=JK
hrq1	hrq1	YLR410W	VIP1		0.78032	0.066	0.91982	0.032	-0.14669	0.066	0.00016
hrq1	hrq1	YML028W	TSA1		0.75768	0.009	0.89855	0.01	-0.1432	0.009	4e-05	status=JK
hrq1	hrq1	YMR170C	ALD2		0.94839	0.002	1.09325	0.017	-0.14226	0.002	0	status=JK
hrq1	hrq1	YHR017W	YSC83		0.46186	0.047	0.58736	0.222	-0.14197	0.047	0.00345	status=JK
hrq1	hrq1	YDR126W	SWF1		0.9104	0.013	1.04758	0.037	-0.14183	0.013	0
hrq1	hrq1	YJL145W	SFH5		0.89385	0.011	1.03434	0.015	-0.14128	0.011	5e-05	status=JK
hrq1	hrq1	YMR175W	SIP18		0.85593	0.039	0.99593	0.019	-0.14127	0.039	3e-05
hrq1	hrq1	YMR166C	YMR166C		0.76492	0.082	0.90307	0.025	-0.14119	0.082	0.00034
hrq1	hrq1	YMR172C-A	YMR172C-A		0.86437	0.017	1.00791	0.021	-0.13988	0.017	0.00013	status=JK
hrq1	hrq1	YGR092W	DBF2		0.67699	0.04	0.81899	0.034	-0.13948	0.04	6e-05
hrq1	hrq1	YOR355W	GDS1		0.7528	0.049	0.88646	0.039	-0.1394	0.049	8e-05
hrq1	hrq1	YKL085W	MDH1		0.84726	0.323	0.98891	0.046	-0.13842	0.323	0.0135
hrq1	hrq1	YMR156C	TPP1		0.91024	0.095	1.04672	0.026	-0.1371	0.094	0.00031
hrq1	hrq1	YKL069W	YKL069W		0.63202	0.077	0.79282	0.096	-0.13703	0.077	0.0005
hrq1	hrq1	YJR091C	JSN1		0.85151	0.185	0.98776	0.047	-0.13682	0.185	0.00272
hrq1	hrq1	YML095C	RAD10		0.91372	0.039	1.04232	0.021	-0.13622	0.039	2e-05
hrq1	hrq1	YOR156C	NFI1		0.88858	0.007	1.02263	0.03	-0.13438	0.007	2e-05	status=JK
hrq1	hrq1	YGR238C	KEL2		0.82876	0.04	0.94829	0.064	-0.13236	0.04	3e-05
hrq1	hrq1	YDR458C	HEH2		0.98779	0.057	1.1018	0.099	-0.13113	0.057	5e-05
hrq1	hrq1	YMR153C-A	YMR153C-A		0.91535	0.043	1.03769	0.032	-0.1311	0.043	3e-05
hrq1	hrq1	YPL057C	SUR1		0.8273	0.003	0.95909	0.017	-0.13067	0.003	1e-05	status=JK
hrq1	hrq1	YGL180W	ATG1		0.87113	0.033	0.99262	0.047	-0.13056	0.033	1e-05
hrq1	hrq1	YMR137C	PSO2		0.90909	0.086	1.03178	0.032	-0.12986	0.086	0.00023
hrq1	hrq1	YAL027W	SAW1		0.87752	0.033	1.00779	0.033	-0.12896	0.033	1e-05
hrq1	hrq1	YBR137W	YBR137W		0.8566	0.053	0.98077	0.024	-0.12877	0.053	7e-05
hrq1	hrq1	YMR158W-A	YMR158W-A		0.91947	0.038	1.04853	0.019	-0.12848	0.038	2e-05
hrq1	hrq1	YMR167W	MLH1		0.76253	0.158	0.9001	0.034	-0.12789	0.158	0.00234
hrq1	hrq1	YMR305C	SCW10		0.87401	0.032	0.99679	0.019	-0.12724	0.032	1e-05
hrq1	hrq1	YKL115C	YKL115C		0.89989	0.021	1.0161	0.054	-0.12696	0.021	0.00018	status=JK
hrq1	hrq1	YNR018W	RCF2		0.58458	0.039	0.71386	0.039	-0.12603	0.039	8e-05
hrq1	hrq1	YPR135W	CTF4		0.65396	0.035	0.77795	0.03	-0.12564	0.035	4e-05
hrq1	hrq1	YMR155W	YMR155W		0.90671	0.026	1.02942	0.011	-0.12558	0.026	0.00027	status=JK
hrq1	hrq1	YMR303C	ADH2		0.93431	0.093	1.0513	0.058	-0.12554	0.093	0.00027
hrq1	hrq1	YDL117W	CYK3		0.7283	0.049	0.85183	0.041	-0.12497	0.049	9e-05
hrq1	hrq1	YDR095C	YDR095C		1.01096	0.037	1.13795	0.022	-0.12433	0.037	1e-05
hrq1	hrq1	YIL113W	SDP1		0.92215	0.238	1.03239	0.031	-0.12402	0.238	0.00448
hrq1	hrq1	YKL032C	IXR1		0.67241	0.102	0.78706	0.089	-0.12358	0.102	0.00095
hrq1	hrq1	YCL069W	VBA3		0.94062	0.094	1.05907	0.014	-0.12281	0.093	0.00027
hrq1	hrq1	YDR111C	ALT2		0.97696	0.003	1.10495	0.026	-0.12201	0.003	0	status=JK
hrq1	hrq1	YOR360C	PDE2		0.80429	0.042	0.92743	0.034	-0.12189	0.042	4e-05
hrq1	hrq1	YDR431W	YDR431W		0.83077	0.05	0.94856	0.009	-0.12116	0.049	0.00118	status=JK
hrq1	hrq1	YDR112W	YDR112W		1.03894	0.053	1.1488	0.043	-0.12109	0.053	4e-05
hrq1	hrq1	YOR238W	YOR238W		0.94308	0.066	1.06891	0.016	-0.12088	0.066	9e-05
hrq1	hrq1	YDR001C	NTH1		0.93261	0.054	1.05454	0.006	-0.12048	0.054	5e-05
hrq1	hrq1	YBR189W	RPS9B		0.11568	0.022	0.21648	0.118	-0.12029	0.022	0.01212	status=JK
hrq1	hrq1	YLR085C	ARP6		0.80116	0.024	0.92064	0.081	-0.12015	0.024	0.00031	status=JK
hrq1	hrq1	YCR033W	SNT1		0.84226	0.007	0.96321	0.004	-0.11899	0.007	3e-05	status=JK
hrq1	hrq1	YKL015W	PUT3		0.91246	0.09	1.02537	0.027	-0.11882	0.09	0.00026
hrq1	hrq1	YJR031C	GEA1		0.94836	0.043	1.07033	0.007	-0.11856	0.043	0.00068	status=JK
hrq1	hrq1	YKR029C	SET3		0.87469	0.052	0.99958	0.033	-0.11856	0.052	6e-05
hrq1	hrq1	YGR039W	YGR039W		0.96372	0.093	1.08262	0.011	-0.11844	0.093	0.00025
hrq1	hrq1	YER120W	SCS2		0.73883	0.019	0.85797	0.046	-0.11809	0.019	0
hrq1	hrq1	YOR179C	SYC1		0.66119	0.106	0.78543	0.016	-0.11736	0.106	0.00111
hrq1	hrq1	YJL139C	YUR1		0.46463	0.089	0.57699	0.437	-0.11536	0.089	0.01211	status=JK
hrq1	hrq1	YDR411C	DFM1		0.91929	0.012	1.03633	0.002	-0.11533	0.012	5e-05	status=JK
hrq1	hrq1	YNR051C	BRE5		0.71251	0.029	0.83125	0.04	-0.11518	0.029	2e-05
hrq1	hrq1	YMR307W	GAS1		0.90511	0.019	1.01892	0.024	-0.11517	0.019	0
hrq1	hrq1	YGR188C	BUB1		0.57512	0.084	0.69618	0.027	-0.11516	0.084	0.00084
hrq1	hrq1	YML066C	SMA2		0.44247	0.14	0.53418	0.138	-0.11512	0.14	0.00796
hrq1	hrq1	YOR129C	AFI1		0.90171	0.035	1.01984	0.047	-0.115	0.035	0.0005	status=JK
hrq1	hrq1	YML047C	PRM6		0.95205	0.121	1.06602	0.008	-0.11451	0.121	0.00055
hrq1	hrq1	YLR315W	NKP2		0.88893	0.122	1.01904	0.058	-0.11435	0.122	0.00618	status=JK
hrq1	hrq1	YDR102C	YDR102C		0.9515	0.1	1.06879	0.005	-0.11396	0.1	0.00032
hrq1	hrq1	YOL081W	IRA2		0.75082	0.047	0.8714	0.063	-0.11386	0.047	7e-05
hrq1	hrq1	YBR050C	REG2		0.87607	0.075	0.97926	0.061	-0.11349	0.075	0.00017
hrq1	hrq1	YIL077C	YIL077C		0.88721	0.082	1.00483	0.02	-0.11343	0.082	0.00022
hrq1	hrq1	YGL215W	CLG1		0.86456	0.21	0.97662	0.059	-0.11302	0.21	0.00375
hrq1	hrq1	YOR314W	YOR314W		0.91989	0.015	1.02925	0.018	-0.11198	0.015	0
hrq1	hrq1	YJL160C	YJL160C		0.94739	0.125	1.061	0.016	-0.11182	0.125	0.00063
hrq1	hrq1	YPL170W	DAP1		0.97887	0.038	1.10074	0.055	-0.11135	0.038	2e-05
hrq1	hrq1	YMR163C	INP2		0.84318	0.13	0.95239	0.02	-0.11121	0.13	0.00099
hrq1	hrq1	YDR485C	VPS72		0.88693	0.148	0.99099	0.033	-0.11032	0.148	0.00125
hrq1	hrq1	YMR193C-A	YMR193C-A		0.6979	0.234	0.79879	0.056	-0.10979	0.233	0.00937
hrq1	hrq1	YGR026W	YGR026W		0.88941	0.13	0.99762	0.003	-0.10965	0.13	0.00085
hrq1	hrq1	YDR482C	CWC21		0.91119	0.11	0.98895	0.103	-0.10935	0.11	0.00048
hrq1	hrq1	YOR309C	YOR309C		0.83648	0.009	0.9417	0.039	-0.10904	0.009	0
hrq1	hrq1	YKL164C	PIR1		0.8988	0.039	1.00443	0.031	-0.10812	0.039	0.00063	status=JK
hrq1	hrq1	YPL003W	ULA1		0.90418	0.021	1.01088	0.011	-0.10781	0.021	0.00018	status=JK
hrq1	hrq1	YLR172C	DPH5		0.86088	0.108	0.96119	0.03	-0.10764	0.108	0.00054
hrq1	hrq1	YDR469W	SDC1		0.80743	0.018	0.91074	0.026	-0.10734	0.018	0
hrq1	hrq1	YPL245W	YPL245W		0.98681	0.005	1.09699	0.006	-0.10729	0.005	1e-05	status=JK
hrq1	hrq1	YAR031W	PRM9		0.92754	0.098	1.0376	0.019	-0.10717	0.098	0.00033
hrq1	hrq1	YOL054W	PSH1		0.90159	0.038	1.0146	0.044	-0.10692	0.038	2e-05
hrq1	hrq1	YDR174W	HMO1		0.20212	0.018	0.30716	0.029	-0.10657	0.018	0.00021
hrq1	hrq1	YKL093W	MBR1		0.3882	0.068	0.49767	0.213	-0.10629	0.068	0.01012	status=JK
hrq1	hrq1	YIL153W	RRD1		0.89258	0.091	1.00073	0.005	-0.10612	0.091	0.00029
hrq1	hrq1	YML011C	RAD33		0.88539	0.086	0.98875	0.034	-0.10597	0.086	0.00025
hrq1	hrq1	YLR178C	TFS1		0.89602	0.03	1.00252	0.058	-0.10589	0.03	1e-05
hrq1	hrq1	YPL058C	PDR12		0.98142	0.006	1.08754	0.058	-0.10547	0.006	1e-05	status=JK
hrq1	hrq1	YIL173W	VTH1		0.89963	0.017	0.99723	0.042	-0.10421	0.017	0.00012	status=JK
hrq1	hrq1	YGL101W	YGL101W		0.94328	0.019	1.04616	0.027	-0.10419	0.019	0
hrq1	hrq1	YPL149W	ATG5		0.89727	0.012	0.99874	0.019	-0.10406	0.012	6e-05	status=JK
hrq1	hrq1	YOR166C	SWT1		0.90278	0.032	1.02704	0.091	-0.10396	0.032	0.00042	status=JK
hrq1	hrq1	YMR144W	YMR144W		0.88871	0.027	0.99512	0.011	-0.10383	0.027	0.0003	status=JK
hrq1	hrq1	YDL074C	BRE1		0.6805	0.054	0.80121	0.035	-0.1038	0.054	0.00013
hrq1	hrq1	YOR017W	PET127		0.6432	0.044	0.74099	0.013	-0.10325	0.044	9e-05
hrq1	hrq1	YLL029W	FRA1		0.85587	0.234	0.97016	0.07	-0.10171	0.234	0.00529
hrq1	hrq1	YOR301W	RAX1		0.96708	0.015	1.05662	0.048	-0.10162	0.015	8e-05	status=JK
hrq1	hrq1	YBR121C	GRS1		0.89109	0.074	0.99526	0.019	-0.10153	0.074	0.00016
hrq1	hrq1	YMR148W	OSW5		0.86833	0.058	0.95831	0.032	-0.10136	0.058	8e-05
hrq1	hrq1	YKL150W	MCR1		0.86941	0.11	0.95361	0.045	-0.10124	0.11	0.00055
hrq1	hrq1	YER119C-A	YER119C-A		0.81466	0.054	0.91069	0.032	-0.10121	0.053	8e-05
hrq1	hrq1	YMR157C	AIM36		0.88658	0.062	0.99602	0.046	-0.10081	0.062	0.0001
hrq1	hrq1	YNL013C	YNL013C		0.87961	0.045	0.98476	0.031	-0.10077	0.045	4e-05
hrq1	hrq1	YNR031C	SSK2		0.89149	0.032	0.99228	0.011	-0.10068	0.032	1e-05
hrq1	hrq1	YGR008C	STF2		0.91891	0.031	1.02332	0.028	-0.1005	0.031	0.00038	status=JK
hrq1	hrq1	YKR095W	MLP1		0.87822	0.089	0.96786	0.048	-0.09979	0.089	0.00028
hrq1	hrq1	YGL023C	PIB2		0.90051	0.006	0.99476	0.038	-0.09962	0.006	1e-05	status=JK
hrq1	hrq1	YBR171W	SEC66		0.87977	0.086	0.97381	0.009	-0.09901	0.086	0.00026
hrq1	hrq1	YKL157W	APE2		0.93643	0.024	1.04121	0.045	-0.09861	0.024	0
hrq1	hrq1	YDR006C	SOK1		0.93237	0.038	1.01717	0.068	-0.09805	0.038	2e-05
hrq1	hrq1	YBL008W	HIR1		0.89238	0.056	0.98429	0.012	-0.09797	0.056	7e-05
hrq1	hrq1	YPL034W	YPL034W		0.96771	0.029	1.06324	0.025	-0.09788	0.029	1e-05
hrq1	hrq1	YBL053W	YBL053W		0.90682	0.003	1.00626	0.025	-0.09741	0.003	0	status=JK
hrq1	hrq1	YNL001W	DOM34		0.86229	0.005	0.96188	0.004	-0.09736	0.005	1e-05	status=JK
hrq1	hrq1	YMR158C-A	YMR158C-A		0.9342	0.101	1.03179	0.063	-0.097	0.101	0.00034
hrq1	hrq1	YMR174C	PAI3		0.91273	0.081	1.01188	0.02	-0.09675	0.081	0.00019
hrq1	hrq1	YLR055C	SPT8		0.86975	0.027	0.9651	0.025	-0.09609	0.027	0.00031	status=JK
hrq1	hrq1	YDL179W	PCL9		0.93944	0.087	1.02519	0.036	-0.09545	0.087	0.00021
hrq1	hrq1	YPL258C	THI21		0.92506	0.04	1.01605	0.02	-0.0954	0.04	2e-05
hrq1	hrq1	YJL197W	UBP12		0.94667	0.034	1.03914	0.018	-0.09528	0.034	1e-05
hrq1	hrq1	YFR013W	IOC3		0.92124	0.011	1.0141	0.061	-0.09447	0.011	5e-05	status=JK
hrq1	hrq1	YCR092C	MSH3		0.93504	0.127	1.0166	0.065	-0.09365	0.127	0.00068
hrq1	hrq1	YOR359W	VTS1		0.92444	0.019	1.0159	0.032	-0.09328	0.019	0
hrq1	hrq1	YNL130C	CPT1		0.92003	0.053	1.01011	0.025	-0.09322	0.053	5e-05
hrq1	hrq1	YGL151W	NUT1		0.89747	0.036	0.985	0.029	-0.09318	0.036	2e-05
hrq1	hrq1	YBR145W	ADH5		0.96888	0.01	1.06068	0.003	-0.09317	0.01	4e-05	status=JK
hrq1	hrq1	YBR201W	DER1		0.93294	0.051	1.01963	0.031	-0.09286	0.051	4e-05
hrq1	hrq1	YMR316W	DIA1		0.94411	0.026	1.02537	0.036	-0.09247	0.026	1e-05
hrq1	hrq1	YPL123C	RNY1		0.98622	0.06	1.07332	0.024	-0.09223	0.06	6e-05
hrq1	hrq1	YKL158W	YKL158W		0.96188	0.028	1.05503	0.017	-0.09183	0.028	0.00029	status=JK
hrq1	hrq1	YGL146C	RRT6		0.8457	0.135	0.93385	0.021	-0.09132	0.135	0.00111
hrq1	hrq1	YKL056C	TMA19		0.66481	0.368	0.77552	0.039	-0.09114	0.368	0.03639
hrq1	hrq1	YJL175W	YJL175W		0.78273	0.025	0.87519	0.025	-0.0911	0.025	1e-05
hrq1	hrq1	YLR111W	YLR111W		0.74252	0.012	0.85018	0.062	-0.09094	0.012	9e-05	status=JK
hrq1	hrq1	YPL180W	TCO89		0.50453	0.093	0.60634	0.051	-0.09062	0.093	0.00169
hrq1	hrq1	YGR017W	YGR017W		0.93236	0.034	1.02662	0.016	-0.09009	0.034	1e-05
hrq1	hrq1	YMR178W	YMR178W		0.96164	0.085	1.05008	0.003	-0.09004	0.085	0.00019
hrq1	hrq1	YHR041C	SRB2		0.68106	0.042	0.77423	0.047	-0.0899	0.042	6e-05
hrq1	hrq1	YLR444C	YLR444C		0.94577	0.109	1.04542	0.022	-0.08969	0.109	0.00042
hrq1	hrq1	YAR003W	SWD1		0.83334	0.007	0.92281	0.01	-0.08919	0.007	0
hrq1	hrq1	YFR040W	SAP155		0.7568	0.043	0.84522	0.042	-0.08891	0.043	5e-05
hrq1	hrq1	YOR188W	MSB1		0.94045	0.03	1.02153	0.041	-0.08881	0.03	1e-05
hrq1	hrq1	YDR139C	RUB1		0.8927	0.024	0.98321	0.023	-0.08877	0.024	0.00025	status=JK
hrq1	hrq1	YHL043W	ECM34		0.91273	0.313	0.9781	0.103	-0.08873	0.313	0.01006
hrq1	hrq1	YGR197C	SNG1		0.91945	0.06	1.00372	0.028	-0.08871	0.06	8e-05
hrq1	hrq1	YMR135C	GID8		0.90491	0.009	1.001	0.034	-0.08854	0.009	3e-05	status=JK
hrq1	hrq1	YMR132C	JLP2		0.93537	0.056	1.0233	0.053	-0.08834	0.056	6e-05
hrq1	hrq1	YMR214W	SCJ1		0.91949	0.088	1.00746	0.036	-0.0882	0.088	0.00024
hrq1	hrq1	YJL094C	KHA1		0.94143	0.024	1.0348	0.051	-0.08798	0.024	0
hrq1	hrq1	YBR245C	ISW1		0.94507	0.013	1.02908	0.026	-0.08792	0.013	7e-05	status=JK
hrq1	hrq1	YPR164W	MMS1		0.78229	0.012	0.87114	0.004	-0.0879	0.012	0
hrq1	hrq1	YDR130C	FIN1		0.99368	0.032	1.0799	0.023	-0.08773	0.032	1e-05
hrq1	hrq1	YHR179W	OYE2		0.9507	0.029	1.04335	0.025	-0.08751	0.029	1e-05
hrq1	hrq1	YLR330W	CHS5		0.88026	0.006	0.96305	0.013	-0.08726	0.006	2e-05	status=JK
hrq1	hrq1	YIL152W	YIL152W		0.94788	0.096	1.02522	0.049	-0.0872	0.096	0.00028
hrq1	hrq1	YMR129W	POM152		0.99126	0.078	1.08224	0.024	-0.08715	0.078	0.00014
hrq1	hrq1	YLL002W	RTT109		0.78235	0.015	0.86441	0.017	-0.08702	0.015	0
hrq1	hrq1	YJL038C	LOH1		0.99684	0.06	1.08033	0.019	-0.08686	0.06	6e-05
hrq1	hrq1	YIL154C	IMP2'		0.8674	0.026	0.95095	0.035	-0.08678	0.026	1e-05
hrq1	hrq1	YLL023C	POM33		0.927	0.103	1.01858	0.013	-0.08676	0.103	0.00037
hrq1	hrq1	YBR076W	ECM8		0.84702	0.01	0.92636	0.043	-0.08674	0.01	4e-05	status=JK
hrq1	hrq1	YDR539W	FDC1		0.87953	0.063	0.97597	0.04	-0.08666	0.063	0.0001
hrq1	hrq1	YKR028W	SAP190		0.92529	0.046	1.00665	0.02	-0.08639	0.046	3e-05
hrq1	hrq1	YLR206W	ENT2		0.89435	0.131	0.97414	0.014	-0.08632	0.131	0.00085
hrq1	hrq1	YJL164C	TPK1		0.86182	0.098	0.9489	0.016	-0.08609	0.098	0.0004
hrq1	hrq1	YIR037W	HYR1		0.90729	0.017	0.98539	0.033	-0.08601	0.017	0.00012	status=JK
hrq1	hrq1	YCR077C	PAT1		0.75999	0.075	0.84239	0.013	-0.08587	0.075	0.00027
hrq1	hrq1	YDR488C	PAC11		0.9087	0.02	0.9791	0.053	-0.08584	0.02	0
hrq1	hrq1	YOR237W	HES1		0.9677	0.032	1.05984	0.011	-0.08581	0.032	1e-05
hrq1	hrq1	YPR040W	TIP41		0.91759	0.039	1.00546	0.028	-0.08575	0.039	2e-05
hrq1	hrq1	YPR079W	MRL1		0.93733	0.014	1.02009	0.042	-0.0857	0.014	8e-05	status=JK
hrq1	hrq1	YAL024C	LTE1		0.89887	0.044	0.97879	0.033	-0.08555	0.043	3e-05
hrq1	hrq1	YHR006W	STP2		0.88045	0.155	0.95533	0.056	-0.08551	0.155	0.00147
hrq1	hrq1	YGR141W	VPS62		0.95761	0.015	1.04303	0.003	-0.08525	0.015	8e-05	status=JK
hrq1	hrq1	YBR032W	YBR032W		0.90011	0.006	0.98157	0.038	-0.08524	0.006	2e-05	status=JK
hrq1	hrq1	YDL053C	PBP4		0.92727	0.069	1.00881	0.034	-0.08523	0.069	0.00011
hrq1	hrq1	YBR246W	RRT2		0.90348	0.029	0.98822	0.018	-0.08523	0.029	1e-05
hrq1	hrq1	YKL048C	ELM1		0.67081	0.073	0.75496	0.011	-0.08508	0.073	0.00035
hrq1	hrq1	YGR059W	SPR3		0.99108	0.035	1.07283	0.037	-0.08485	0.035	0.00042	status=JK
hrq1	hrq1	YOL089C	HAL9		0.92471	0.076	1.00834	0.005	-0.08454	0.076	0.00015
hrq1	hrq1	YKL206C	ADD66		0.87234	0.08	0.95453	0.02	-0.08425	0.08	0.00021
hrq1	hrq1	YGR028W	MSP1		0.93921	0.057	1.01813	0.017	-0.0839	0.057	6e-05
hrq1	hrq1	YGL195W	GCN1		0.92367	0.091	1.00425	0.008	-0.08382	0.091	0.00026
hrq1	hrq1	YLR329W	REC102		0.9605	0.032	1.0418	0.017	-0.0838	0.032	1e-05
hrq1	hrq1	YLR335W	NUP2		0.97412	0.031	1.05479	0.041	-0.08365	0.031	1e-05
hrq1	hrq1	YPL036W	PMA2		0.84626	0.068	0.94725	0.057	-0.08349	0.068	0.00014
hrq1	hrq1	YML074C	FPR3		0.94716	0.039	1.02913	0.009	-0.08348	0.039	2e-05
hrq1	hrq1	YPL056C	LCL1		0.92793	0.046	1.00542	0.054	-0.08327	0.046	3e-05
hrq1	hrq1	YDR099W	BMH2		0.96436	0.034	1.04783	0.012	-0.08325	0.034	1e-05
hrq1	hrq1	YDR097C	MSH6		0.96582	0.025	1.04831	0.003	-0.08317	0.025	0
hrq1	hrq1	YKR072C	SIS2		0.8763	0.035	0.96857	0.031	-0.08291	0.035	2e-05
hrq1	hrq1	YJL168C	SET2		0.90994	0.099	0.99303	0.013	-0.08247	0.099	0.00035
hrq1	hrq1	YHR086W	NAM8		0.95018	0.166	1.03074	0.023	-0.08246	0.166	0.00143
hrq1	hrq1	YOR192C	THI72		0.95313	0.02	1.03541	0.004	-0.08213	0.02	0.00015	status=JK
hrq1	hrq1	YDR538W	PAD1		0.95142	0.024	1.02466	0.057	-0.08188	0.024	0
hrq1	hrq1	YKL025C	PAN3		0.95672	0.061	1.0415	0.026	-0.08184	0.061	7e-05
hrq1	hrq1	YML020W	YML020W		0.93106	0.036	1.00849	0.023	-0.08161	0.036	2e-05
hrq1	hrq1	YLR320W	MMS22		0.52834	0.079	0.62611	0.067	-0.08156	0.079	0.0009
hrq1	hrq1	YGR111W	YGR111W		0.95217	0.015	1.03961	0.026	-0.08153	0.015	9e-05	status=JK
hrq1	hrq1	YHL045W	YHL045W		0.96192	0.381	1.03466	0.112	-0.08127	0.381	0.01502
hrq1	hrq1	YPR185W	ATG13		0.92381	0.059	1.00121	0.026	-0.08125	0.059	7e-05
hrq1	hrq1	YLR404W	FLD1		0.94681	0.081	1.02539	0.025	-0.0811	0.081	0.00017
hrq1	hrq1	YLR228C	ECM22		1.01105	0.09	1.09196	0.011	-0.08096	0.09	0.00019
hrq1	hrq1	YLR313C	SPH1		0.88693	0.024	0.95663	0.021	-0.08088	0.024	0.00025	status=JK
hrq1	hrq1	YLR296W	YLR296W		0.96624	0.042	1.04716	0.014	-0.08088	0.042	2e-05
hrq1	hrq1	YDR096W	GIS1		1.00989	0.019	1.09056	0.022	-0.0808	0.019	0
hrq1	hrq1	YDR389W	SAC7		0.911	0.047	0.98979	0.012	-0.0808	0.047	4e-05
hrq1	hrq1	YBR180W	DTR1		0.95106	0.008	1.02904	0.031	-0.08074	0.008	0
hrq1	hrq1	YPL270W	MDL2		0.96492	0.076	1.00527	0.077	-0.08064	0.076	0.00014
hrq1	hrq1	YIL155C	GUT2		0.95886	0.046	1.03913	0.009	-0.08058	0.046	3e-05
hrq1	hrq1	YDL180W	YDL180W		0.95335	0.099	1.01866	0.081	-0.08052	0.099	0.0003
hrq1	hrq1	YPR053C	YPR053C		0.94599	0.012	1.02754	0.028	-0.08052	0.012	5e-05	status=JK
hrq1	hrq1	YDR116C	MRPL1		0.99761	0.014	1.06809	0.042	-0.08025	0.014	0
hrq1	hrq1	YLR092W	SUL2		0.94716	0.061	1.03752	0.05	-0.08013	0.061	7e-05
hrq1	hrq1	YPL048W	CAM1		0.68175	0.008	0.59647	0.009	0.08025	0.008	4e-05	status=JK
hrq1	hrq1	YIL050W	PCL7		1.02133	0.005	0.94341	0.044	0.08026	0.005	1e-05	status=JK
hrq1	hrq1	YNL145W	MFA2		1.12675	0.058	1.03326	0.076	0.0804	0.058	4e-05
hrq1	hrq1	YOR066W	MSA1		1.11296	0.039	1.03071	0.006	0.08044	0.039	1e-05
hrq1	hrq1	YML103C	NUP188		0.84251	0.056	0.78357	0.071	0.08108	0.056	8e-05
hrq1	hrq1	YGR069W	YGR069W		1.04481	0.029	0.97424	0.022	0.08114	0.028	1e-05
hrq1	hrq1	YBR200W	BEM1		0.71632	0.051	0.61468	0.138	0.08118	0.051	0.0001
hrq1	hrq1	YOR135C	YOR135C		0.93207	0.061	0.85111	0.019	0.08126	0.061	8e-05
hrq1	hrq1	YOR215C	AIM41		1.06004	0.041	0.98985	0.064	0.08129	0.041	0.0005	status=JK
hrq1	hrq1	YLR261C	YLR261C		0.83507	0.004	0.753	0.018	0.08131	0.004	1e-05	status=JK
hrq1	hrq1	YLR185W	RPL37A		0.75347	0.035	0.69124	0.119	0.08144	0.035	3e-05
hrq1	hrq1	YML037C	YML037C		1.09843	0.013	1.01578	0.001	0.08172	0.013	0
hrq1	hrq1	YLR061W	RPL22A		0.98733	0.01	0.9038	0.042	0.08175	0.01	4e-05	status=JK
hrq1	hrq1	YGR236C	SPG1		1.07606	0.012	0.99168	0.007	0.08178	0.012	4e-05	status=JK
hrq1	hrq1	YNL009W	IDP3		1.06077	0.047	0.97426	0.009	0.08199	0.047	2e-05
hrq1	hrq1	YER187W	YER187W		1.15176	0.053	1.07088	0.03	0.082	0.053	3e-05
hrq1	hrq1	YDL215C	GDH2		0.97996	0.047	0.89961	0.003	0.08202	0.047	3e-05
hrq1	hrq1	YGL253W	HXK2		0.99521	0.01	0.9113	0.012	0.08207	0.01	3e-05	status=JK
hrq1	hrq1	YJR033C	RAV1		0.96767	0.024	0.88618	0.039	0.08236	0.024	0.00021	status=JK
hrq1	hrq1	YNL156C	NSG2		1.07	0.043	0.98531	0.039	0.08247	0.043	2e-05
hrq1	hrq1	YGR161C	RTS3		1.07159	0.033	0.98734	0.031	0.08252	0.033	1e-05
hrq1	hrq1	YCL001W-A	YCL001W-A		1.07771	0.042	0.99377	0.009	0.08282	0.042	2e-05
hrq1	hrq1	YGR077C	PEX8		0.97188	0.014	0.89687	0.035	0.08283	0.014	7e-05	status=JK
hrq1	hrq1	YHR189W	PTH1		1.01164	0.093	0.92548	0.02	0.08314	0.093	0.00022
hrq1	hrq1	YJR118C	ILM1		0.67468	0.087	0.59751	0.012	0.08324	0.086	0.00057
hrq1	hrq1	YBR178W	YBR178W		1.11573	0.025	1.03496	0.045	0.08329	0.025	0
hrq1	hrq1	YJR066W	TOR1		1.07039	0.009	0.98928	0.014	0.08347	0.009	3e-05	status=JK
hrq1	hrq1	YLR018C	POM34		1.08085	0.031	1.00436	0.039	0.08365	0.031	1e-05
hrq1	hrq1	YKL197C	PEX1		1.01085	0.043	0.92814	0.014	0.08366	0.043	2e-05
hrq1	hrq1	YDL190C	UFD2		1.06056	0.031	0.98959	0.059	0.08369	0.031	1e-05
hrq1	hrq1	YOL065C	INP54		1.14157	0.022	1.06934	0.041	0.08384	0.022	0.00013	status=JK
hrq1	hrq1	YOR242C	SSP2		1.08917	0.006	1.0125	0.047	0.08399	0.006	1e-05	status=JK
hrq1	hrq1	YNL154C	YCK2		1.03507	0.025	0.94899	0.032	0.08404	0.025	0
hrq1	hrq1	YML038C	YMD8		0.84457	0.045	0.76128	0.009	0.08408	0.045	4e-05
hrq1	hrq1	YOL044W	PEX15		0.96782	0.028	0.88601	0.008	0.08416	0.028	1e-05
hrq1	hrq1	YER081W	SER3		1.0935	0.013	1.00943	0.005	0.08419	0.013	5e-05	status=JK
hrq1	hrq1	YJR126C	VPS70		1.00172	0.054	0.91696	0.034	0.08432	0.054	4e-05
hrq1	hrq1	YNL083W	SAL1		1.10112	0.016	1.03238	0.046	0.08433	0.016	0
hrq1	hrq1	YFL013C	IES1		0.91271	0.007	0.83523	0.028	0.0845	0.007	2e-05	status=JK
hrq1	hrq1	YNR049C	MSO1		1.04986	0.046	0.96412	0.005	0.08491	0.046	2e-05
hrq1	hrq1	YGR031W	IMO32		1.08541	0.061	1.00121	0.025	0.08492	0.061	5e-05
hrq1	hrq1	YMR302C	YME2		1.08937	0.063	1.00725	0.035	0.08493	0.063	5e-05
hrq1	hrq1	YGL170C	SPO74		0.94525	0.007	0.84027	0.112	0.0854	0.007	2e-05	status=JK
hrq1	hrq1	YOL086C	ADH1		1.06101	0.118	0.98474	0.074	0.08547	0.118	0.00038
hrq1	hrq1	YMR020W	FMS1		1.06005	0.002	0.96954	0.028	0.08585	0.002	0	status=JK
hrq1	hrq1	YNL142W	MEP2		1.0782	0.013	0.99447	0.005	0.086	0.013	0
hrq1	hrq1	YIR033W	MGA2		1.00757	0.016	0.92274	0.02	0.08622	0.016	0
hrq1	hrq1	YDR149C	YDR149C		0.95928	0.054	0.86888	0.011	0.08639	0.054	5e-05
hrq1	hrq1	YLR361C	DCR2		1.06454	0.086	0.9697	0.05	0.08645	0.086	0.00015
hrq1	hrq1	YDL214C	PRR2		1.06567	0.047	0.98168	0.061	0.0865	0.047	2e-05
hrq1	hrq1	YOL080C	REX4		1.062	0.027	0.98491	0.056	0.0865	0.027	0
hrq1	hrq1	YGL222C	EDC1		0.78312	0.055	0.70115	0.081	0.08654	0.055	0.0001
hrq1	hrq1	YIR035C	YIR035C		1.12475	0.04	1.03735	0.003	0.08667	0.04	1e-05
hrq1	hrq1	YML030W	RCF1		1.05222	0.011	0.96947	0.043	0.0868	0.01	3e-05	status=JK
hrq1	hrq1	YGR135W	PRE9		0.99403	0.055	0.9082	0.042	0.0869	0.055	5e-05
hrq1	hrq1	YOL084W	PHM7		1.09742	0.05	1.01459	0.014	0.08739	0.05	3e-05
hrq1	hrq1	YPR069C	SPE3		0.89027	0.057	0.8012	0.024	0.08749	0.057	7e-05
hrq1	hrq1	YBL089W	AVT5		1.04475	0.032	0.95946	0.009	0.08781	0.032	1e-05
hrq1	hrq1	YNL071W	LAT1		1.02493	0.067	0.93799	0.025	0.08782	0.067	8e-05
hrq1	hrq1	YKL009W	MRT4		0.7915	0.066	0.70473	0.014	0.08798	0.066	0.00016
hrq1	hrq1	YGL087C	MMS2		1.13198	0.167	1.04162	0.026	0.08835	0.167	0.00088
hrq1	hrq1	YGR085C	RPL11B		1.0313	0.064	0.93543	0.029	0.08835	0.064	6e-05
hrq1	hrq1	YBR297W	MAL33		1.09553	0.049	0.99972	0.043	0.08838	0.049	3e-05
hrq1	hrq1	YJL138C	TIF2		0.89022	0.008	0.80224	0.003	0.0884	0.008	3e-05	status=JK
hrq1	hrq1	YIR023W	DAL81		0.92027	0.054	0.83867	0.014	0.0886	0.054	6e-05
hrq1	hrq1	YMR039C	SUB1		0.95297	0.063	0.85562	0.058	0.08864	0.063	8e-05
hrq1	hrq1	YMR012W	CLU1		1.10477	0.06	1.00959	0.026	0.08873	0.06	4e-05
hrq1	hrq1	YPL260W	YPL260W		1.06829	0.023	0.97603	0.008	0.08903	0.023	0.00015	status=JK
hrq1	hrq1	YGL258W	VEL1		1.1106	0.022	1.02121	0.023	0.08907	0.022	0
hrq1	hrq1	YMR221C	YMR221C		1.13078	0.078	1.03335	0.031	0.08956	0.078	9e-05
hrq1	hrq1	YPR134W	MSS18		1.00036	0.056	0.91262	0.027	0.08985	0.056	5e-05
hrq1	hrq1	YDL183C	YDL183C		1.00722	0.031	0.9192	0.042	0.08992	0.031	1e-05
hrq1	hrq1	YNL146W	YNL146W		1.12927	0.116	1.0429	0.034	0.08997	0.116	0.0003
hrq1	hrq1	YCR107W	AAD3		1.14028	0.034	1.0587	0.018	0.09002	0.034	0.0003	status=JK
hrq1	hrq1	YDL081C	RPP1A		0.77883	0.012	0.69006	0.041	0.09007	0.012	7e-05	status=JK
hrq1	hrq1	YHL030W	ECM29		1.10436	0.044	1.032	0.063	0.09024	0.044	2e-05
hrq1	hrq1	YNL144C	YNL144C		1.13433	0.062	1.04975	0.032	0.09088	0.062	5e-05
hrq1	hrq1	YMR115W	MGR3		1.04922	0.055	0.95269	0.018	0.091	0.055	4e-05
hrq1	hrq1	YGR105W	VMA21		0.76778	0.037	0.68088	0.069	0.09114	0.037	3e-05
hrq1	hrq1	YCR031C	RPS14A		0.92495	0.011	0.83979	0.027	0.09133	0.011	0
hrq1	hrq1	YIR005W	IST3		0.95348	0.004	0.86039	0.035	0.09158	0.004	1e-05	status=JK
hrq1	hrq1	YDR512C	EMI1		0.98235	0.021	0.89308	0.022	0.09215	0.021	0
hrq1	hrq1	YGL251C	HFM1		1.11717	0.049	1.02711	0.027	0.09215	0.049	2e-05
hrq1	hrq1	YLR325C	RPL38		1.06621	0.063	0.97214	0.029	0.09233	0.063	6e-05
hrq1	hrq1	YMR104C	YPK2		1.14518	0.076	1.04476	0.023	0.09246	0.076	8e-05
hrq1	hrq1	YLR084C	RAX2		1.04262	0.044	0.93618	0.042	0.09284	0.044	0.00059	status=JK
hrq1	hrq1	YML029W	USA1		1.10885	0.052	1.01488	0.033	0.09327	0.052	3e-05
hrq1	hrq1	YKL184W	SPE1		0.70222	0.026	0.60745	0.057	0.09347	0.026	1e-05
hrq1	hrq1	YJL211C	YJL211C		1.02724	0.05	0.932	0.009	0.09351	0.05	3e-05
hrq1	hrq1	YGL059W	PKP2		0.92011	0.103	0.80564	0.151	0.0936	0.103	0.00038
hrq1	hrq1	YML117W-A	YML117W-A		1.11841	0.083	1.02028	0.017	0.0936	0.083	0.00011
hrq1	hrq1	YML012C-A	YML012C-A		0.52932	0.109	0.44366	0.088	0.09362	0.108	0.00229
hrq1	hrq1	YPL183C	RTT10		1.01603	0.013	0.92446	0.045	0.09399	0.013	6e-05	status=JK
hrq1	hrq1	YOR078W	BUD21		0.56145	0.049	0.43787	0.142	0.09428	0.049	0.00251	status=JK
hrq1	hrq1	YLL045C	RPL8B		0.73859	0.037	0.648	0.02	0.09444	0.037	3e-05
hrq1	hrq1	YMR119W	ASI1		1.09543	0.069	0.99957	0.029	0.09447	0.069	7e-05
hrq1	hrq1	YNL090W	RHO2		1.1217	0.037	1.02931	0.018	0.09456	0.037	1e-05
hrq1	hrq1	YPL101W	ELP4		0.91934	0.009	0.82524	0.004	0.09461	0.009	3e-05	status=JK
hrq1	hrq1	YLR251W	SYM1		1.1213	0.077	1.02693	0.021	0.09461	0.077	9e-05
hrq1	hrq1	YDR540C	IRC4		1.07874	0.01	0.98326	0.008	0.09498	0.01	3e-05	status=JK
hrq1	hrq1	YGR019W	UGA1		0.57718	0.252	0.56632	0.311	0.09511	0.252	0.01959
hrq1	hrq1	YPL261C	YPL261C		0.9777	0.011	0.87921	0.024	0.09518	0.011	4e-05	status=JK
hrq1	hrq1	YBR077C	SLM4		1.14916	0.013	1.04737	0.011	0.09524	0.013	5e-05	status=JK
hrq1	hrq1	YIL141W	YIL141W		1.15452	0.036	1.05532	0.029	0.0953	0.036	1e-05
hrq1	hrq1	YMR038C	CCS1		0.21355	0.028	0.1178	0.002	0.09558	0.028	0.00062
hrq1	hrq1	YNL068C	FKH2		1.11067	0.037	1.01681	0.008	0.09572	0.037	1e-05
hrq1	hrq1	YMR230W	RPS10B		0.92281	0.016	0.8278	0.006	0.09589	0.016	0.0001	status=JK
hrq1	hrq1	YDL181W	INH1		1.03974	0.069	0.94734	0.022	0.09591	0.069	8e-05
hrq1	hrq1	YMR031C	EIS1		1.10574	0.105	1.01201	0.091	0.09613	0.105	0.00023
hrq1	hrq1	YOL071W	EMI5		0.94717	0.037	0.82942	0.07	0.09632	0.037	0.0005	status=JK
hrq1	hrq1	YBR084C-A	RPL19A		0.98892	0.027	0.89593	0.006	0.09633	0.027	1e-05
hrq1	hrq1	YOL036W	YOL036W		1.11666	0.014	1.02416	0.011	0.09661	0.014	5e-05	status=JK
hrq1	hrq1	YOR339C	UBC11		1.03272	0.091	0.92574	0.053	0.09749	0.091	0.00019
hrq1	hrq1	YML109W	ZDS2		1.06749	0.03	0.97053	0.038	0.09751	0.029	0.00025	status=JK
hrq1	hrq1	YDR471W	RPL27B		0.96137	0.043	0.86422	0.029	0.09762	0.043	2e-05
hrq1	hrq1	YLR038C	COX12		0.98807	0.032	0.89456	0.037	0.09809	0.032	1e-05
hrq1	hrq1	YML052W	SUR7		1.06507	0.017	0.96658	0.028	0.09832	0.017	9e-05	status=JK
hrq1	hrq1	YNR027W	BUD17		1.11794	0.019	1.01991	0.005	0.09886	0.019	0
hrq1	hrq1	YER153C	PET122		1.03945	0.011	0.94268	0.037	0.09893	0.011	4e-05	status=JK
hrq1	hrq1	YMR056C	AAC1		1.12422	0.045	1.02612	0.029	0.0992	0.045	2e-05
hrq1	hrq1	YCL032W	STE50		0.70173	0.027	0.60408	0.042	0.09982	0.027	0.00048	status=JK
hrq1	hrq1	YBR048W	RPS11B		0.9251	0.016	0.8243	0.059	0.09989	0.016	0.0001	status=JK
hrq1	hrq1	YNL140C	YNL140C		1.10279	0.051	1.00014	0.019	0.10025	0.051	3e-05
hrq1	hrq1	YMR018W	YMR018W		1.11874	0.006	1.01534	0.028	0.10051	0.006	1e-05	status=JK
hrq1	hrq1	YMR299C	DYN3		1.06905	0.027	0.97725	0.043	0.10053	0.027	0
hrq1	hrq1	YAL031C	GIP4		1.067	0.045	0.98263	0.051	0.10063	0.045	2e-05
hrq1	hrq1	YMR008C	PLB1		1.13853	0.027	1.0354	0.004	0.1008	0.027	0
hrq1	hrq1	YKL068W	NUP100		1.0678	0.009	0.96493	0.004	0.10092	0.009	0
hrq1	hrq1	YOL004W	SIN3		0.95154	0.021	0.84681	0.039	0.10141	0.021	0
hrq1	hrq1	YLR082C	SRL2		1.14623	0.05	1.03244	0.04	0.10151	0.05	2e-05
hrq1	hrq1	YDL136W	RPL35B		0.9588	0.025	0.86109	0.039	0.10219	0.025	1e-05
hrq1	hrq1	YIL040W	APQ12		0.57017	0.134	0.51895	0.254	0.10221	0.134	0.01791	status=JK
hrq1	hrq1	YGL198W	YIP4		0.93429	0.024	0.82865	0.007	0.10258	0.024	0.00023	status=JK
hrq1	hrq1	YPL178W	CBC2		0.25347	0.095	0.16768	0.072	0.10283	0.095	0.04351	status=JK
hrq1	hrq1	YPR066W	UBA3		0.81552	0.008	0.71778	0.023	0.10292	0.008	3e-05	status=JK
hrq1	hrq1	YOL008W	COQ10		1.00992	0.014	0.91024	0.008	0.103	0.014	7e-05	status=JK
hrq1	hrq1	YBR086C	IST2		1.0555	0.045	0.95793	0.027	0.10341	0.045	2e-05
hrq1	hrq1	YOR334W	MRS2		1.09255	0.053	0.99036	0.012	0.10342	0.053	3e-05
hrq1	hrq1	YLR393W	ATP10		0.99702	0.031	0.8935	0.019	0.1035	0.031	1e-05
hrq1	hrq1	YNL051W	COG5		1.06838	0.037	0.96826	0.019	0.10361	0.037	1e-05
hrq1	hrq1	YDL200C	MGT1		1.06421	0.015	0.96152	0.001	0.10373	0.015	0
hrq1	hrq1	YNR006W	VPS27		0.79045	0.028	0.69559	0.05	0.1039	0.028	0.00043	status=JK
hrq1	hrq1	YDL199C	YDL199C		1.01596	0.043	0.90976	0.017	0.10435	0.043	2e-05
hrq1	hrq1	YBR165W	UBS1		0.7524	0.002	0.64048	0.066	0.10458	0.002	0	status=JK
hrq1	hrq1	YML005W	TRM12		1.1191	0.014	1.02343	0.019	0.10466	0.014	5e-05	status=JK
hrq1	hrq1	YBR031W	RPL4A		1.03018	0.087	0.90655	0.091	0.1047	0.087	0.00017
hrq1	hrq1	YML026C	RPS18B		0.83492	0.013	0.73136	0.03	0.10549	0.013	8e-05	status=JK
hrq1	hrq1	YLR434C	YLR434C		1.11709	0.007	1.01069	0.027	0.10551	0.007	1e-05	status=JK
hrq1	hrq1	YMR312W	ELP6		0.94686	0.083	0.8221	0.061	0.10722	0.083	0.00018
hrq1	hrq1	YER083C	GET2		1.0121	0.09	0.91045	0.03	0.10733	0.089	0.00019
hrq1	hrq1	YBL103C	RTG3		0.79928	0.024	0.69133	0.005	0.1076	0.024	1e-05
hrq1	hrq1	YLR001C	YLR001C		1.08956	0.054	0.98332	0.016	0.10773	0.054	0.00082	status=JK
hrq1	hrq1	YML076C	WAR1		1.11501	0.043	1.00333	0.009	0.10798	0.043	2e-05
hrq1	hrq1	YMR119W-A	YMR119W-A		1.12928	0.036	1.02317	0.014	0.10847	0.036	1e-05
hrq1	hrq1	YBL087C	RPL23A		0.93879	0.071	0.8263	0.036	0.10849	0.071	0.00012
hrq1	hrq1	YOR183W	FYV12		0.81126	0.016	0.70391	0.01	0.10927	0.016	0
hrq1	hrq1	YDL082W	RPL13A		0.70099	0.307	0.62245	0.145	0.10967	0.307	0.01965
hrq1	hrq1	YDR435C	PPM1		1.07193	0.041	0.95753	0.09	0.1097	0.041	2e-05
hrq1	hrq1	YDR019C	GCV1		1.01737	0.08	0.93412	0.11	0.11003	0.08	0.00013
hrq1	hrq1	YLR184W	YLR184W		0.97535	0.088	0.88449	0.069	0.1104	0.088	0.0002
hrq1	hrq1	YGL205W	POX1		1.11589	0.034	1.00691	0.005	0.11056	0.034	0.00032	status=JK
hrq1	hrq1	YDL239C	ADY3		1.05678	0.056	0.93075	0.077	0.11059	0.056	4e-05
hrq1	hrq1	YOL067C	RTG1		0.86814	0.024	0.76679	0.053	0.11065	0.024	1e-05
hrq1	hrq1	YHR008C	SOD2		0.65182	0.199	0.58192	0.189	0.11093	0.199	0.00721
hrq1	hrq1	YPL165C	SET6		1.08523	0.018	0.97153	0.022	0.11126	0.018	0
hrq1	hrq1	YMR318C	ADH6		1.0938	0.041	0.98206	0.005	0.11132	0.041	1e-05
hrq1	hrq1	YML006C	GIS4		1.03715	0.033	0.92043	0.016	0.11169	0.033	0.00035	status=JK
hrq1	hrq1	YPR141C	KAR3		0.82955	0.034	0.71809	0.017	0.11329	0.034	2e-05
hrq1	hrq1	YLR371W	ROM2		0.896	0.064	0.785	0.078	0.11389	0.064	0.0001
hrq1	hrq1	YGL157W	ARI1		1.12398	0.021	1.01026	0.006	0.11418	0.021	0.00012	status=JK
hrq1	hrq1	YDR024W	YDR024W		1.01976	0.04	0.90694	0.011	0.11423	0.04	2e-05
hrq1	hrq1	YJL110C	GZF3		1.08585	0.095	0.97039	0.052	0.1146	0.095	0.00018
hrq1	hrq1	YGL167C	PMR1		0.85941	0.032	0.73758	0.032	0.11506	0.032	1e-05
hrq1	hrq1	YLR183C	TOS4		1.13742	0.019	1.02098	0.019	0.11595	0.019	9e-05	status=JK
hrq1	hrq1	YHR184W	SSP1		1.17783	0.094	1.06228	0.026	0.11598	0.093	0.00014
hrq1	hrq1	YER095W	RAD51		1.01388	0.062	0.90076	0.019	0.11638	0.062	6e-05
hrq1	hrq1	YHL006C	SHU1		1.16194	0.076	1.04269	0.015	0.11678	0.076	8e-05
hrq1	hrq1	YPL207W	TYW1		1.10782	0.02	0.97808	0.116	0.11757	0.02	0
hrq1	hrq1	YHL033C	RPL8A		1.01734	0.05	0.90519	0.023	0.11759	0.05	0.0008	status=JK
hrq1	hrq1	YMR223W	UBP8		1.07973	0.031	0.95982	0.037	0.11877	0.031	1e-05
hrq1	hrq1	YOR253W	NAT5		1.08401	0.102	0.94881	0.052	0.1189	0.102	0.00023
hrq1	hrq1	YKL006W	RPL14A		0.84807	0.029	0.73561	0.033	0.11937	0.029	1e-05
hrq1	hrq1	YPL239W	YAR1		0.74682	0.048	0.61912	0.043	0.12202	0.048	7e-05
hrq1	hrq1	YML094W	GIM5		1.18601	0.056	1.06348	0.034	0.12213	0.056	3e-05
hrq1	hrq1	YFR009W	GCN20		1.03797	0.052	0.9211	0.02	0.12255	0.052	3e-05
hrq1	hrq1	YGL032C	AGA2		1.14417	0.034	1.02155	0.014	0.12265	0.034	0.00029	status=JK
hrq1	hrq1	YMR052W	FAR3		1.16775	0.028	1.04297	0.041	0.12333	0.028	0
hrq1	hrq1	YML118W	NGL3		1.10484	0.007	0.97721	0.01	0.12345	0.007	1e-05	status=JK
hrq1	hrq1	YJL210W	PEX2		1.03305	0.088	0.9091	0.007	0.12353	0.088	0.00017
hrq1	hrq1	YNL045W	LAP2		1.14694	0.026	1.03632	0.047	0.12362	0.026	0
hrq1	hrq1	YMR226C	YMR226C		1.12766	0.088	1.00233	0.044	0.12413	0.088	0.00013
hrq1	hrq1	YDR161W	YDR161W		0.73447	0.095	0.61661	0.037	0.12434	0.095	0.0006
hrq1	hrq1	YOR136W	IDH2		0.88791	0.049	0.75991	0.022	0.12502	0.049	5e-05
hrq1	hrq1	YMR241W	YHM2		0.91811	0.065	0.78412	0.026	0.12595	0.065	0.0001
hrq1	hrq1	YNL020C	ARK1		1.10628	0.047	0.98661	0.031	0.12601	0.047	2e-05
hrq1	hrq1	YPL106C	SSE1		0.77208	0.004	0.63778	0.047	0.12623	0.004	1e-05	status=JK
hrq1	hrq1	YOR274W	MOD5		1.09171	0.018	0.96482	0.037	0.12682	0.018	9e-05	status=JK
hrq1	hrq1	YJR087W	YJR087W		0.99293	0.076	0.86094	0.052	0.12686	0.076	0.00013
hrq1	hrq1	YNL094W	APP1		1.11336	0.064	0.99649	0.036	0.1271	0.064	5e-05
hrq1	hrq1	YOL052C	SPE2		0.87855	0.034	0.75348	0.004	0.12741	0.034	2e-05
hrq1	hrq1	YOR106W	VAM3		0.79795	0.154	0.6536	0.085	0.12776	0.154	0.00193
hrq1	hrq1	YBR119W	MUD1		1.03534	0.021	0.92453	0.095	0.12782	0.021	0.00014	status=JK
hrq1	hrq1	YML067C	ERV41		1.13708	0.058	1.00352	0.052	0.12791	0.058	4e-05
hrq1	hrq1	YLR207W	HRD3		1.1486	0.035	1.02359	0.021	0.1288	0.035	1e-05
hrq1	hrq1	YKL010C	UFD4		1.11677	0.033	0.98533	0.009	0.12901	0.033	1e-05
hrq1	hrq1	YER079W	YER079W		1.01477	0.003	0.8943	0.026	0.13178	0.003	0	status=JK
hrq1	hrq1	YDL192W	ARF1		0.70101	0.202	0.53509	0.135	0.13318	0.202	0.00612
hrq1	hrq1	YDL237W	AIM6		1.01731	0.033	0.88888	0.07	0.13451	0.033	1e-05
hrq1	hrq1	YFL001W	DEG1		1.02495	0.007	0.88779	0.004	0.13571	0.007	2e-05	status=JK
hrq1	hrq1	YML124C	TUB3		1.14779	0.028	1.01846	0.025	0.13599	0.028	0
hrq1	hrq1	YFR048W	RMD8		0.96519	0.011	0.83348	0.02	0.13608	0.011	5e-05	status=JK
hrq1	hrq1	YMR044W	IOC4		1.21288	0.034	1.07268	0.012	0.13694	0.034	1e-05
hrq1	hrq1	YLR234W	TOP3		0.9556	0.128	0.82315	0.06	0.13699	0.128	0.00065
hrq1	hrq1	YDL213C	NOP6		0.98212	0.013	0.85476	0.038	0.13818	0.013	0
hrq1	hrq1	YLR435W	TSR2		0.80671	0.014	0.66922	0.006	0.13828	0.014	0.0001	status=JK
hrq1	hrq1	YPL053C	KTR6		1.13622	0.059	1.00031	0.015	0.13933	0.059	4e-05
hrq1	hrq1	YGL149W	YGL149W		1.04594	0.03	0.90546	0.031	0.13954	0.03	0.00028	status=JK
hrq1	hrq1	YDR513W	GRX2		0.85869	0.082	0.7072	0.044	0.14033	0.082	0.00024
hrq1	hrq1	YHR194W	MDM31		0.29496	0.038	0.14952	0.043	0.14065	0.038	0.00537	status=JK
hrq1	hrq1	YDR388W	RVS167		0.88439	0.073	0.72524	0.066	0.14166	0.073	0.00015
hrq1	hrq1	YMR041C	ARA2		0.91698	0.037	0.78191	0.053	0.14279	0.037	0.00055	status=JK
hrq1	hrq1	YHR049C-A	YHR049C-A		1.12985	0.061	0.98202	0.044	0.14296	0.061	4e-05
hrq1	hrq1	YLR193C	UPS1		0.89985	0.055	0.76006	0.017	0.14306	0.055	6e-05
hrq1	hrq1	YML128C	MSC1		1.09038	0.052	0.95202	0.039	0.14344	0.052	3e-05
hrq1	hrq1	YLR131C	ACE2		1.0488	0.075	0.87119	0.162	0.14347	0.075	0.0017	status=JK
hrq1	hrq1	YMR294W-A	YMR294W-A		0.83401	0.061	0.68975	0.05	0.14434	0.061	0.00011
hrq1	hrq1	YDL238C	GUD1		1.10484	0.027	0.95815	0.018	0.14438	0.027	0
hrq1	hrq1	YLR376C	PSY3		1.13339	0.042	0.98937	0.012	0.14442	0.042	1e-05
hrq1	hrq1	YMR105C	PGM2		1.13921	0.097	0.99686	0.015	0.14445	0.097	0.00017
hrq1	hrq1	YKL137W	CMC1		1.01265	0.023	0.87199	0.032	0.14454	0.023	0.00017	status=JK
hrq1	hrq1	YMR243C	ZRC1		0.92632	0.095	0.77666	0.022	0.14474	0.095	0.0003
hrq1	hrq1	YNL072W	RNH201		0.61703	0.287	0.50779	0.408	0.14494	0.287	0.02315
hrq1	hrq1	YIL090W	ICE2		0.5391	0.296	0.40572	0.043	0.14513	0.296	0.03566
hrq1	hrq1	YLL046C	RNP1		1.1266	0.1	0.97751	0.049	0.14546	0.1	0.00262	status=JK
hrq1	hrq1	YJL158C	CIS3		1.1361	0.026	0.98406	0.01	0.14656	0.026	0.00018	status=JK
hrq1	hrq1	YMR040W	YET2		1.12949	0.079	0.97898	0.008	0.14663	0.078	9e-05
hrq1	hrq1	YGL174W	BUD13		0.95172	0.047	0.80691	0.029	0.14776	0.047	3e-05
hrq1	hrq1	YIL157C	COA1		1.10943	0.041	0.95318	0.048	0.14781	0.041	1e-05
hrq1	hrq1	YMR080C	NAM7		1.18331	0.033	1.03188	0.054	0.14861	0.033	1e-05
hrq1	hrq1	YDL218W	YDL218W		0.91145	0.018	0.74797	0.062	0.14882	0.018	0.00013	status=JK
hrq1	hrq1	YIL017C	VID28		1.07843	0.044	0.92969	0.015	0.14931	0.044	0.00056	status=JK
hrq1	hrq1	YNL135C	FPR1		1.05522	0.045	0.90302	0.041	0.14983	0.045	2e-05
hrq1	hrq1	YMR037C	MSN2		1.14106	0.075	0.9858	0.011	0.1504	0.075	8e-05
hrq1	hrq1	YMR099C	YMR099C		1.15329	0.052	0.99786	0.009	0.15212	0.052	3e-05
hrq1	hrq1	YHL031C	GOS1		0.82977	0.082	0.6719	0.088	0.15214	0.082	0.00027
hrq1	hrq1	YNL037C	IDH1		0.99074	0.197	0.83494	0.005	0.15454	0.196	0.00208
hrq1	hrq1	YOL108C	INO4		0.71435	0.04	0.55145	0.043	0.15496	0.04	0.00104	status=JK
hrq1	hrq1	YDL219W	DTD1		0.98426	0.073	0.82939	0.014	0.15649	0.073	0.00011
hrq1	hrq1	YMR070W	MOT3		1.14466	0.035	0.99147	0.033	0.15724	0.035	1e-05
hrq1	hrq1	YIL134W	FLX1		0.95697	0.007	0.80068	0.009	0.15795	0.007	2e-05	status=JK
hrq1	hrq1	YDL236W	PHO13		0.95693	0.057	0.79922	0.018	0.15935	0.057	6e-05
hrq1	hrq1	YGL024W	YGL024W		0.57655	0.037	0.4151	0.026	0.16071	0.037	7e-05
hrq1	hrq1	YMR086C-A	YMR086C-A		1.21442	0.026	1.03598	0.08	0.16108	0.026	0
hrq1	hrq1	YML081C-A	ATP18		1.06529	0.013	0.88245	0.066	0.16178	0.013	5e-05	status=JK
hrq1	hrq1	YBR016W	YBR016W		0.67971	0.048	0.52521	0.044	0.16218	0.048	0.0001
hrq1	hrq1	YBR126C	TPS1		0.8729	0.064	0.72409	0.053	0.16379	0.063	0.00011
hrq1	hrq1	YMR058W	FET3		1.20399	0.108	1.03942	0.001	0.16387	0.107	0.0002
hrq1	hrq1	YMR110C	HFD1		1.23408	0.003	1.0684	0.005	0.16391	0.003	0	status=JK
hrq1	hrq1	YMR057C	YMR057C		1.19201	0.056	1.02589	0.003	0.16558	0.056	3e-05
hrq1	hrq1	YPL144W	POC4		0.98202	0.049	0.80271	0.092	0.16687	0.049	3e-05
hrq1	hrq1	YGL105W	ARC1		0.23348	0.027	0.06806	0.048	0.16727	0.026	0.00427	status=JK
hrq1	hrq1	YDL240W	LRG1		1.03062	0.021	0.85989	0.027	0.16764	0.021	0
hrq1	hrq1	YGL214W	YGL214W		0.39058	0.158	0.22852	0.045	0.16812	0.158	0.01586
hrq1	hrq1	YMR052C-A	YMR052C-A		1.14967	0.104	0.9791	0.024	0.16988	0.104	0.0002
hrq1	hrq1	YBR061C	TRM7		1.0336	0.007	0.85202	0.093	0.17035	0.007	2e-05	status=JK
hrq1	hrq1	YER178W	PDA1		0.94583	0.06	0.77845	0.011	0.17109	0.06	7e-05
hrq1	hrq1	YOR128C	ADE2		1.03968	0.02	0.88065	0.1	0.17174	0.02	0.00012	status=JK
hrq1	hrq1	YDR532C	KRE28		0.6058	0.023	0.41184	0.062	0.1743	0.023	2e-05
hrq1	hrq1	YMR010W	YMR010W		1.19454	0.021	1.02347	0.017	0.17549	0.021	0.00011	status=JK
hrq1	hrq1	YMR085W	YMR085W		1.23393	0.028	1.04671	0.039	0.17703	0.028	0
hrq1	hrq1	YMR238W	DFG5		1.16807	0.033	0.98952	0.054	0.17824	0.033	1e-05
hrq1	hrq1	YDL211C	YDL211C		1.06135	0.036	0.88465	0.007	0.17902	0.036	1e-05
hrq1	hrq1	YLR357W	RSC2		0.63872	0.051	0.46207	0.042	0.18075	0.051	0.00213	status=JK
hrq1	hrq1	YMR103C	YMR103C		1.18174	0.034	1.00149	0.015	0.18284	0.034	1e-05
hrq1	hrq1	YBL021C	HAP3		0.68215	0.41	0.5396	0.375	0.18497	0.41	0.04474
hrq1	hrq1	YNL141W	AAH1		0.84329	0.006	0.65577	0.007	0.18538	0.006	2e-05	status=JK
hrq1	hrq1	YMR021C	MAC1		1.04031	0.044	0.86301	0.051	0.18702	0.044	2e-05
hrq1	hrq1	YMR075W	RCO1		1.17757	0.071	0.98964	0.007	0.18848	0.071	6e-05
hrq1	hrq1	YLR180W	SAM1		0.95636	0.143	0.78337	0.046	0.1896	0.143	0.00091
hrq1	hrq1	YLR065C	ENV10		0.92102	0.008	0.73628	0.027	0.18986	0.008	0
hrq1	hrq1	YIL132C	CSM2		1.17752	0.012	0.98973	0.006	0.19	0.012	3e-05	status=JK
hrq1	hrq1	YMR067C	UBX4		1.15809	0.007	0.9737	0.058	0.19131	0.007	1e-05	status=JK
hrq1	hrq1	YDL216C	RRI1		0.96469	0.064	0.77502	0.038	0.19316	0.064	8e-05
hrq1	hrq1	YNL076W	MKS1		0.91405	0.02	0.72134	0.005	0.19334	0.02	0.00016	status=JK
hrq1	hrq1	YMR095C	SNO1		1.21601	0.029	1.02943	0.041	0.1951	0.029	0
hrq1	hrq1	YPL024W	RMI1		1.05122	0.056	0.85592	0.009	0.19586	0.056	4e-05
hrq1	hrq1	YNR020C	ATP23		1.01861	0.003	0.82037	0.035	0.19973	0.003	0	status=JK
hrq1	hrq1	YOR293W	RPS10A		0.93307	0.007	0.72711	0.024	0.20102	0.007	2e-05	status=JK
hrq1	hrq1	YMR107W	SPG4		1.22422	0.054	1.02161	0.03	0.20154	0.054	2e-05
hrq1	hrq1	YIL125W	KGD1		0.25254	0.11	0.04864	0.039	0.20158	0.11	0.01964
hrq1	hrq1	YMR234W	RNH1		1.23931	0.084	1.03835	0.04	0.2021	0.084	9e-05
hrq1	hrq1	YMR063W	RIM9		1.06165	0.098	0.86099	0.033	0.20326	0.098	0.00022
hrq1	hrq1	YMR233W	TRI1		1.23018	0.011	1.02572	0.01	0.20347	0.011	3e-05	status=JK
hrq1	hrq1	YMR073C	IRC21		1.15797	0.07	0.95752	0.049	0.20723	0.07	6e-05
hrq1	hrq1	YNL153C	GIM3		0.89182	0.041	0.69964	0.137	0.20758	0.041	3e-05
hrq1	hrq1	YMR106C	YKU80		1.24438	0.018	1.01846	0.046	0.21209	0.018	7e-05	status=JK
hrq1	hrq1	YMR054W	STV1		1.18999	0.092	0.98444	0.047	0.2158	0.092	0.00013
hrq1	hrq1	YMR068W	AVO2		1.24822	0.048	1.034	0.017	0.21582	0.048	2e-05
hrq1	hrq1	YMR201C	RAD14		0.54216	0.314	0.33196	0.149	0.21672	0.313	0.04072
hrq1	hrq1	YMR035W	IMP2		1.12363	0.037	0.90309	0.017	0.21789	0.037	1e-05
hrq1	hrq1	YDL222C	FMP45		0.96618	0.065	0.74745	0.008	0.21923	0.065	8e-05
hrq1	hrq1	YMR109W	MYO5		1.25042	0.009	1.02804	0.019	0.22483	0.009	2e-05	status=JK
hrq1	hrq1	YGL218W	YGL218W		0.71782	0.036	0.48459	0.033	0.22685	0.036	0.00084	status=JK
hrq1	hrq1	YOR312C	RPL20B		1.01476	0.057	0.79191	0.019	0.22934	0.056	5e-05
hrq1	hrq1	YCR063W	BUD31		0.84497	0.017	0.61544	0.021	0.23085	0.017	0.00014	status=JK
hrq1	hrq1	YMR087W	YMR087W		1.20696	0.01	0.98209	0.037	0.23147	0.01	2e-05	status=JK
hrq1	hrq1	YLR235C	YLR235C		1.03104	0.163	0.79289	0.021	0.23587	0.163	0.00106
hrq1	hrq1	YMR101C	SRT1		1.27005	0.017	1.0353	0.021	0.23956	0.017	6e-05	status=JK
hrq1	hrq1	YDL234C	GYP7		1.05896	0.094	0.75529	0.191	0.24265	0.094	0.00019
hrq1	hrq1	YMR075C-A	YMR075C-A		1.21763	0.04	0.97014	0.031	0.24439	0.04	1e-05
hrq1	hrq1	YDL241W	YDL241W		1.06982	0.017	0.82021	0.049	0.24453	0.017	9e-05	status=JK
hrq1	hrq1	YDR008C	YDR008C		1.08007	0.006	0.8302	0.024	0.25288	0.006	1e-05	status=JK
hrq1	hrq1	YML022W	APT1		0.90869	0.235	0.66281	0.138	0.25777	0.235	0.00451
hrq1	hrq1	YDL224C	WHI4		1.00057	0.031	0.73633	0.056	0.26415	0.031	1e-05
hrq1	hrq1	YMR086W	SEG1		1.31576	0.11	1.04043	0.025	0.26878	0.11	0.00016
hrq1	hrq1	YMR100W	MUB1		1.12053	0.058	0.85156	0.029	0.26978	0.058	4e-05
hrq1	hrq1	YMR096W	SNZ1		1.23336	0.042	0.95388	0.009	0.28004	0.042	1e-05
hrq1	hrq1	YMR102C	YMR102C		1.30969	0.046	1.02493	0.027	0.28522	0.045	1e-05
hrq1	hrq1	YDL122W	UBP1		0.89846	0.54	0.62429	0.154	0.2878	0.539	0.04474
hrq1	hrq1	YDL233W	MFG1		0.99824	0.008	0.69425	0.029	0.28919	0.008	2e-05	status=JK
hrq1	hrq1	YDL223C	HBT1		1.04567	0.054	0.73189	0.081	0.29348	0.054	4e-05
hrq1	hrq1	YNL080C	EOS1		0.86345	0.005	0.54841	0.029	0.31803	0.005	1e-05	status=JK
hrq1	hrq1	YJR077C	MIR1		0.50625	0.051	0.15704	0.016	0.34297	0.051	0.00337	status=JK
hrq1	hrq1	YMR092C	AIP1		1.35723	0.018	0.98184	0.042	0.38036	0.018	6e-05	status=JK
hrq1	hrq1	YDL230W	PTP1		1.01713	0.056	0.64156	0.063	0.39134	0.056	5e-05
hrq1	hrq1	YDL231C	BRE4		1.04886	0.012	0.62913	0.043	0.41344	0.012	5e-05	status=JK
hrq1	hrq1	YDL226C	GCS1		1.02538	0.093	0.62076	0.049	0.41374	0.093	0.0002
hrq1	hrq1	YFL036W	RPO41		0.67924	0.131	0.20411	0.01	0.47862	0.131	0.0019
hrq1	hrq1	YDL229W	SSB1		0.91919	0.045	0.38697	0.044	0.53566	0.045	3e-05
hrq1	hrq1	YGL136C	MRM2		0.84901	0.53	0.31069	0.052	0.55279	0.53	0.04928
hrq1	hrq1	YDL232W	OST4		0.83717	0.238	0.2021	0.055	0.62728	0.237	0.00587
hrq1	hrq1	YGL237C	HAP2		1.16407	0.087	0.58948	0.332	0.64538	0.087	0.00186	status=JK
hrq1	hrq1	YJR054W	KCH1		1.65478	0.128	0.26072	0.083	1.36838	0.128	0.00199	status=JK

## Sheet: Table S7
Query ORF	Query Name	Array ORF	Array Name	Array annotation	Normalized colony size (EXPERIMENT)	Normalized colony std. dev. (EXPERIMENT)	Normalized colony size (CONTROL)	Normalized colony std. dev. (CONTROL)	Score	Score stdev	p-Value	Additional information
hrq1	hrq1	YBR228W	SLX1		0.37536	0.054	1.04613	0.021	-0.66627	0.054	0.00082
hrq1	hrq1	YDR386W	MUS81		0.38568	0.059	1.01758	0.05	-0.63541	0.059	0.00096
hrq1	hrq1	YJL092W	SRS2		0.38606	0.011	0.94058	0.026	-0.55895	0.011	1e-05
hrq1	hrq1	YHR031C	RRM3		0.4456	0.074	0.99428	0.035	-0.54631	0.074	0.00124
hrq1	hrq1	YMR275C	BUL1		0.49061	0.084	1.01167	0.034	-0.52083	0.083	0.00132
hrq1	hrq1	YER116C	SLX8		0.18279	0.003	0.69712	0.023	-0.52049	0.003	7e-05	status=JK
hrq1	hrq1	YMR282C	AEP2		0.49737	0.054	1.00449	0.015	-0.50302	0.054	0.00034
hrq1	hrq1	YGR097W	ASK10		0.20755	0.04	0.71242	0.026	-0.49853	0.04	0.01201	status=JK
hrq1	hrq1	YMR031W-A	YMR031W-A		0.24665	0.035	0.68212	0.37	-0.47002	0.035	0.00673	status=JK
hrq1	hrq1	YLR135W	SLX4		0.50962	0.026	0.97858	0.03	-0.4673	0.026	0.0009	status=JK
hrq1	hrq1	YOR144C	ELG1		0.47341	0.07	0.93661	0.039	-0.46298	0.07	0.00087
hrq1	hrq1	YHR134W	WSS1		0.45405	0.098	0.92159	0.045	-0.46211	0.098	0.00265
hrq1	hrq1	YHR017W	YSC83		0.14763	0.045	0.58736	0.222	-0.45557	0.045	0.02939	status=JK
hrq1	hrq1	YMR259C	TRM732		0.54438	0.026	1.0033	0.011	-0.45376	0.026	3e-05
hrq1	hrq1	YGL175C	SAE2		0.54977	0.055	0.99669	0.012	-0.44749	0.055	0.00028
hrq1	hrq1	YMR258C	ROY1		0.56417	0.107	1.0107	0.099	-0.4457	0.107	0.00181
hrq1	hrq1	YMR194C-A	YMR194C-A		0.56771	0.051	1.01951	0.028	-0.44493	0.051	0.0002
hrq1	hrq1	YBR099C	YBR099C		0.56823	0.062	1.00608	0.026	-0.43811	0.062	0.00035
hrq1	hrq1	YHL029C	OCA5		0.44603	0.203	0.89501	0.064	-0.43779	0.203	0.02178
hrq1	hrq1	YER111C	SWI4		0.51515	0.07	0.94159	0.009	-0.42738	0.07	0.00068
hrq1	hrq1	YDL135C	RDI1		0.64267	0.086	1.04115	0.038	-0.40057	0.085	0.00585	status=JK
hrq1	hrq1	YML042W	CAT2		0.46752	0.026	0.83246	0.229	-0.398	0.026	0.00099	status=JK
hrq1	hrq1	YBR094W	PBY1		0.60864	0.015	1.00775	0.006	-0.39561	0.015	0.00019	status=JK
hrq1	hrq1	YMR204C	INP1		0.46458	0.172	0.86912	0.045	-0.39545	0.172	0.01246
hrq1	hrq1	YMR276W	DSK2		0.61977	0.018	1.00557	0.016	-0.38561	0.018	0.00027	status=JK
hrq1	hrq1	YLR154C	RNH203		0.61704	0.013	1.0058	0.042	-0.38296	0.013	0.00015	status=JK
hrq1	hrq1	YCL061C	MRC1		0.57753	0.067	0.95593	0.01	-0.38105	0.067	0.00043
hrq1	hrq1	YMR283C	RIT1		0.7134	0.049	1.08757	0.004	-0.37227	0.049	9e-05
hrq1	hrq1	YMR262W	YMR262W		0.6639	0.017	1.02841	0.014	-0.3666	0.017	0.00022	status=JK
hrq1	hrq1	YBR100W	YBR100W		0.55967	0.034	0.91943	0.006	-0.35746	0.034	6e-05
hrq1	hrq1	YJR084W	YJR084W		0.59285	0.327	0.91763	0.114	-0.34878	0.326	0.03601
hrq1	hrq1	YMR191W	SPG5		0.71146	0.122	1.05869	0.005	-0.34395	0.122	0.00136
hrq1	hrq1	YMR196W	YMR196W		0.70792	0.032	1.04701	0.018	-0.34335	0.032	0.00069	status=JK
hrq1	hrq1	YPR024W	YME1		0.4619	0.015	0.79981	0.021	-0.34231	0.015	0.00034	status=JK
hrq1	hrq1	YBR098W	MMS4		0.64879	0.005	0.98788	0.073	-0.34197	0.005	2e-05	status=JK
hrq1	hrq1	YMR179W	SPT21		0.43535	0.057	0.78764	0.078	-0.33902	0.057	0.00062
hrq1	hrq1	YDL013W	SLX5		0.16423	0.021	0.48716	0.035	-0.33268	0.021	0.00059
hrq1	hrq1	YOR080W	DIA2		0.21956	0.009	0.54943	0.006	-0.33009	0.009	0.00057	status=JK
hrq1	hrq1	YMR256C	COX7		0.71694	0.045	1.04594	0.021	-0.32996	0.045	7e-05
hrq1	hrq1	YPL036W	PMA2		0.61084	0.193	0.94725	0.057	-0.31913	0.193	0.00794
hrq1	hrq1	YKR065C	PAM17		0.64632	0.297	0.98313	0.037	-0.31602	0.297	0.02237
hrq1	hrq1	YDR186C	YDR186C		0.73949	0.205	1.0524	0.01	-0.31371	0.205	0.00553
hrq1	hrq1	YNR010W	CSE2		0.38735	0.084	0.72093	0.2	-0.30949	0.084	0.01527	status=JK
hrq1	hrq1	YGL241W	KAP114		0.73323	0.353	1.00206	0.155	-0.30219	0.352	0.0253
hrq1	hrq1	YMR269W	TMA23		0.48041	0.085	0.77965	0.037	-0.30038	0.085	0.0015
hrq1	hrq1	YDL185W	VMA1		0.73703	0.14	1.03663	0.018	-0.29993	0.139	0.00181
hrq1	hrq1	YBR093C	PHO5		0.63032	0.065	0.9307	0.017	-0.29979	0.065	0.0003
hrq1	hrq1	YMR265C	YMR265C		0.75369	0.165	1.05229	0.07	-0.2983	0.164	0.00275
hrq1	hrq1	YMR181C	YMR181C		0.72491	0.085	1.02582	0.042	-0.29728	0.085	0.00045
hrq1	hrq1	YPL022W	RAD1		0.63185	0.032	0.90765	0.067	-0.29727	0.032	0.00085	status=JK
hrq1	hrq1	YMR263W	SAP30		0.7649	0.03	1.06213	0.047	-0.29701	0.03	2e-05
hrq1	hrq1	YMR172W	HOT1		0.7299	0.109	1.01224	0.059	-0.29507	0.109	0.0009
hrq1	hrq1	YMR266W	RSN1		0.70627	0.058	0.99914	0.005	-0.29229	0.058	0.00015
hrq1	hrq1	YMR253C	YMR253C		0.75228	0.122	1.04931	0.014	-0.29175	0.122	0.00114
hrq1	hrq1	YGL215W	CLG1		0.68744	0.368	0.97662	0.059	-0.28903	0.368	0.03352
hrq1	hrq1	YNL072W	RNH201		0.18856	0.068	0.50779	0.408	-0.2837	0.068	0.0118
hrq1	hrq1	YMR194W	RPL36A		0.61418	0.055	0.89039	0.033	-0.28011	0.054	0.00019
hrq1	hrq1	YMR205C	PFK2		0.5619	0.049	0.81889	0.104	-0.27628	0.049	0.00018
hrq1	hrq1	YER162C	RAD4		0.1239	0.032	0.48775	0.4	-0.27628	0.032	0.02157	status=JK
hrq1	hrq1	YGL255W	ZRT1		0.66075	0.025	0.93498	0.043	-0.27598	0.025	0.00047	status=JK
hrq1	hrq1	YMR182C	RGM1		0.75593	0.119	1.03114	0.053	-0.27513	0.119	0.00105
hrq1	hrq1	YBR026C	ETR1		0.29396	0.049	0.57989	0.066	-0.27148	0.049	0.00931	status=JK
hrq1	hrq1	YML112W	CTK3		0.746	0.242	1.01329	0.074	-0.27101	0.242	0.00862
hrq1	hrq1	YHR021C	RPS27B		0.40035	0.08	0.66925	0.025	-0.26949	0.08	0.00213
hrq1	hrq1	YMR195W	ICY1		0.76007	0.051	1.02381	0.02	-0.26736	0.051	8e-05
hrq1	hrq1	YMR186W	HSC82		0.72853	0.019	0.99762	0.029	-0.26295	0.019	0.00022	status=JK
hrq1	hrq1	YMR180C	CTL1		0.76792	0.068	1.0269	0.021	-0.26061	0.068	0.00019
hrq1	hrq1	YKL150W	MCR1		0.71639	0.271	0.95361	0.045	-0.25361	0.27	0.01316
hrq1	hrq1	YHR154W	RTT107		0.714	0.154	0.96229	0.054	-0.25256	0.153	0.00263
hrq1	hrq1	YMR280C	CAT8		0.68048	0.072	0.92843	0.007	-0.25193	0.072	0.00032
hrq1	hrq1	YGR092W	DBF2		0.56369	0.044	0.81899	0.034	-0.25188	0.044	0.00013
hrq1	hrq1	YJL139C	YUR1		0.3288	0.121	0.57699	0.437	-0.25098	0.121	0.04228	status=JK
hrq1	hrq1	YMR183C	SSO2		0.75852	0.029	1.00538	0.051	-0.24626	0.029	2e-05
hrq1	hrq1	YKL113C	RAD27		0.615	0.086	0.86131	0.002	-0.24607	0.086	0.00075
hrq1	hrq1	YBR289W	SNF5		0.27262	0.02	0.50655	0.064	-0.24276	0.02	0.00171	status=JK
hrq1	hrq1	YDL071C	YDL071C		0.86052	0.227	1.08833	0.079	-0.24201	0.227	0.00478
hrq1	hrq1	YAL024C	LTE1		0.74608	0.071	0.97879	0.033	-0.23885	0.071	0.00024
hrq1	hrq1	YOR025W	HST3		0.78669	0.087	1.02278	0.039	-0.23787	0.087	0.00037
hrq1	hrq1	YMR162C	DNF3		0.83276	0.061	1.06641	0.014	-0.23348	0.061	0.00011
hrq1	hrq1	YMR305C	SCW10		0.76922	0.116	0.99679	0.019	-0.23294	0.115	0.00092
hrq1	hrq1	YML066C	SMA2		0.32415	0.044	0.53418	0.138	-0.23279	0.044	0.00599	status=JK
hrq1	hrq1	YMR165C	PAH1		0.56746	0.058	0.83915	0.126	-0.23179	0.058	0.0003
hrq1	hrq1	YMR167W	MLH1		0.6578	0.172	0.9001	0.034	-0.23164	0.172	0.00468
hrq1	hrq1	YNL143C	YNL143C		0.79012	0.106	1.02221	0.012	-0.23006	0.106	0.00065
hrq1	hrq1	YMR169C	ALD3		0.8032	0.024	1.03762	0.035	-0.22958	0.024	1e-05
hrq1	hrq1	YHR041C	SRB2		0.54128	0.068	0.77423	0.047	-0.22906	0.068	0.00054
hrq1	hrq1	YDL074C	BRE1		0.55598	0.083	0.80121	0.035	-0.22885	0.083	0.0009
hrq1	hrq1	YMR190C	SGS1		0.71511	0.096	0.93548	0.04	-0.22769	0.096	0.00066
hrq1	hrq1	YCR077C	PAT1		0.6191	0.011	0.84239	0.013	-0.22733	0.011	0.0001	status=JK
hrq1	hrq1	YNR066C	YNR066C		0.78293	0.248	1.02187	0.045	-0.22718	0.248	0.00803
hrq1	hrq1	YHR067W	HTD2		0.39034	0.015	0.61509	0.005	-0.22669	0.015	0.00051	status=JK
hrq1	hrq1	YMR251W-A	HOR7		0.66242	0.057	0.8794	0.054	-0.22661	0.057	0.00018
hrq1	hrq1	YHR061C	GIC1		0.19944	0.032	0.42177	0.133	-0.22614	0.032	0.0086	status=JK
hrq1	hrq1	YHL034C	SBP1		0.76915	0.213	0.99557	0.061	-0.2241	0.213	0.00547
hrq1	hrq1	YPL069C	BTS1		0.32815	0.04	0.54698	0.036	-0.22355	0.04	0.00049
hrq1	hrq1	YCL060C	YCL060C		0.74348	0.065	0.98143	0.057	-0.22244	0.065	0.00018
hrq1	hrq1	YMR192W	GYL1		0.79856	0.011	1.02752	0.044	-0.22188	0.011	6e-05	status=JK
hrq1	hrq1	YHL045W	YHL045W		0.82057	0.085	1.03466	0.112	-0.22181	0.085	0.00353	status=JK
hrq1	hrq1	YMR254C	YMR254C		0.74379	0.015	0.96716	0.051	-0.22091	0.015	0.00014	status=JK
hrq1	hrq1	YMR189W	GCV2		0.77705	0.047	0.99689	0.003	-0.21893	0.047	6e-05
hrq1	hrq1	YHL043W	ECM34		0.78223	0.209	0.9781	0.103	-0.21845	0.209	0.00494
hrq1	hrq1	YMR172C-A	YMR172C-A		0.78745	0.097	1.00791	0.021	-0.21572	0.097	0.00051
hrq1	hrq1	YMR202W	ERG2		0.54978	0.066	0.77448	0.057	-0.21569	0.066	0.00046
hrq1	hrq1	YMR170C	ALD2		0.87701	0.023	1.09325	0.017	-0.21248	0.023	0
hrq1	hrq1	YJR043C	POL32		0.70023	0.035	0.91502	0.017	-0.21072	0.035	4e-05
hrq1	hrq1	YDR500C	RPL37B		0.18378	0.068	0.38976	0.005	-0.20754	0.068	0.04255	status=JK
hrq1	hrq1	YBR204C	LDH1		0.17908	0.011	0.38326	0.159	-0.2074	0.011	0.00132	status=JK
hrq1	hrq1	YHL036W	MUP3		0.54238	0.015	0.74232	0.344	-0.2057	0.015	1e-05
hrq1	hrq1	YMR173W	DDR48		0.76812	0.09	0.97424	0.005	-0.20476	0.09	0.00044
hrq1	hrq1	YLR037C	PAU23		0.79557	0.196	0.9879	0.039	-0.2013	0.196	0.00391
hrq1	hrq1	YOR078W	BUD21		0.26692	0.018	0.43787	0.142	-0.20087	0.018	0.00146	status=JK
hrq1	hrq1	YMR187C	YMR187C		0.81182	0.052	1.00133	0.038	-0.19986	0.052	7e-05
hrq1	hrq1	YOR017W	PET127		0.54826	0.069	0.74099	0.013	-0.19942	0.069	0.00055
hrq1	hrq1	YDL162C	YDL162C		0.78888	0.104	0.99567	0.03	-0.19876	0.104	0.00062
hrq1	hrq1	YOL124C	TRM11		0.7834	0.072	0.98116	0.013	-0.19726	0.072	0.00021
hrq1	hrq1	YMR176W	ECM5		0.796	0.038	0.99568	0.009	-0.19422	0.038	3e-05
hrq1	hrq1	YMR175W	SIP18		0.80297	0.005	0.99593	0.019	-0.19319	0.005	1e-05	status=JK
hrq1	hrq1	YBR170C	NPL4		0.60017	0.107	0.78227	0.053	-0.19302	0.107	0.00151
hrq1	hrq1	YDR001C	NTH1		0.86131	0.072	1.05454	0.006	-0.19246	0.072	0.00016
hrq1	hrq1	YBL027W	RPL19B		0.57082	0.015	0.76213	0.036	-0.19218	0.015	0.00022	status=JK
hrq1	hrq1	YOR358W	HAP5		0.75585	0.324	0.95858	0.127	-0.19206	0.323	0.01851
hrq1	hrq1	YJL207C	LAA1		0.82237	0.047	1.0106	0.039	-0.18369	0.047	5e-05
hrq1	hrq1	YMR177W	MMT1		0.86573	0.03	1.04898	0.007	-0.18301	0.03	1e-05
hrq1	hrq1	YGR188C	BUB1		0.5113	0.02	0.69618	0.027	-0.17846	0.02	0.00053	status=JK
hrq1	hrq1	YDR112W	YDR112W		0.98254	0.072	1.1488	0.043	-0.17825	0.072	0.00011
hrq1	hrq1	YGL007W	YGL007W		0.6568	0.073	0.83687	0.051	-0.17433	0.073	0.00037
hrq1	hrq1	YDR121W	DPB4		0.99265	0.052	1.16979	0.026	-0.17371	0.052	4e-05
hrq1	hrq1	YMR307W	GAS1		0.84824	0.028	1.01892	0.024	-0.17302	0.028	1e-05
hrq1	hrq1	YMR048W	CSM3		0.82051	0.106	0.98202	0.054	-0.17275	0.106	0.00059
hrq1	hrq1	YBR050C	REG2		0.81586	0.23	0.97926	0.061	-0.17267	0.23	0.00575
hrq1	hrq1	YMR210W	YMR210W		0.86606	0.117	1.04303	0.007	-0.17263	0.117	0.00067
hrq1	hrq1	YJL187C	SWE1		0.40319	0.231	0.61612	0.317	-0.17241	0.231	0.03977
hrq1	hrq1	YMR178W	YMR178W		0.88103	0.032	1.05008	0.003	-0.16953	0.032	0.00043	status=JK
hrq1	hrq1	YJL160C	YJL160C		0.89	0.277	1.061	0.016	-0.16897	0.277	0.00768
hrq1	hrq1	YJL183W	MNN11		0.76239	0.365	0.92759	0.163	-0.16841	0.365	0.02501
hrq1	hrq1	YOL041C	NOP12		0.42302	0.042	0.58542	0.017	-0.16787	0.042	0.00027
hrq1	hrq1	YKL212W	SAC1		0.2116	0.091	0.38643	0.08	-0.16738	0.091	0.0186
hrq1	hrq1	YML041C	VPS71		0.7894	0.078	0.95604	0.089	-0.1657	0.078	0.00026
hrq1	hrq1	YER128W	VFA1		0.71402	0.279	0.84746	0.157	-0.16532	0.279	0.01443
hrq1	hrq1	YDR128W	MTC5		0.78608	0.022	0.94763	0.012	-0.16182	0.022	1e-05
hrq1	hrq1	YMR140W	SIP5		0.90743	0.042	1.06066	0.036	-0.16062	0.042	3e-05
hrq1	hrq1	YMR164C	MSS11		0.82217	0.131	0.98557	0.018	-0.15931	0.131	0.00109
hrq1	hrq1	YMR300C	ADE4		0.93107	0.037	1.0887	0.005	-0.15892	0.037	2e-05
hrq1	hrq1	YDL074C	BRE1		0.65677	0.046	0.81912	0.032	-0.15827	0.046	9e-05
hrq1	hrq1	YMR188C	MRPS17		0.82981	0.037	0.99489	0.031	-0.15777	0.037	3e-05
hrq1	hrq1	YLR346C	YLR346C		0.85997	0.188	1.01101	0.056	-0.15467	0.188	0.00276
hrq1	hrq1	YJL175W	YJL175W		0.71927	0.037	0.87519	0.025	-0.15434	0.037	4e-05
hrq1	hrq1	YPR051W	MAK3		0.83206	0.111	0.97895	0.018	-0.15395	0.111	0.00064
hrq1	hrq1	YDR124W	YDR124W		1.04403	0.037	1.20441	0.043	-0.15273	0.037	1e-05
hrq1	hrq1	YDL056W	MBP1		0.94829	0.185	1.09011	0.046	-0.15176	0.185	0.00197
hrq1	hrq1	YDR387C	YDR387C		0.90873	0.045	1.05931	0.012	-0.1515	0.045	0.00082	status=JK
hrq1	hrq1	YDR073W	SNF11		0.85566	0.016	1.01258	0.024	-0.15105	0.016	0.00012	status=JK
hrq1	hrq1	YDR107C	TMN2		0.96453	0.068	1.10802	0.033	-0.15083	0.068	0.0001
hrq1	hrq1	YDR388W	RVS167		0.5928	0.092	0.72524	0.066	-0.15026	0.092	0.00102
hrq1	hrq1	YNL134C	YNL134C		0.86297	0.122	1.01725	0.023	-0.15022	0.122	0.00077
hrq1	hrq1	YER152C	YER152C		0.90411	0.096	1.05002	0.018	-0.14996	0.096	0.00032
hrq1	hrq1	YDL077C	VAM6		0.2682	0.16	0.43141	0.238	-0.14764	0.16	0.04387
hrq1	hrq1	YDR122W	KIN1		1.04914	0.013	1.19897	0.014	-0.14693	0.013	5e-05	status=JK
hrq1	hrq1	YKL140W	TGL1		0.90456	0.08	1.05542	0.007	-0.1463	0.08	0.00019
hrq1	hrq1	YKR016W	FCJ1		0.80615	0.027	0.95221	0.017	-0.1456	0.027	0.00038	status=JK
hrq1	hrq1	YML095C	RAD10		0.9036	0.046	1.04232	0.021	-0.14527	0.046	4e-05
hrq1	hrq1	YIL057C	RGI2		0.87748	0.225	1.0209	0.006	-0.14527	0.225	0.00439
hrq1	hrq1	YOL104C	NDJ1		0.8714	0.148	1.00146	0.066	-0.14516	0.148	0.00132
hrq1	hrq1	YPL055C	LGE1		0.6437	0.024	0.79386	0.024	-0.14404	0.024	1e-05
hrq1	hrq1	YBR225W	YBR225W		0.83856	0.14	0.98077	0.008	-0.14305	0.14	0.00125
hrq1	hrq1	YOL001W	PHO80		0.7776	0.018	0.91433	0.011	-0.1422	0.018	0.00019	status=JK
hrq1	hrq1	YGL208W	SIP2		0.8073	0.113	0.95011	0.016	-0.14204	0.113	0.00074
hrq1	hrq1	YDR102C	YDR102C		0.92425	0.113	1.06879	0.005	-0.14193	0.113	0.0005
hrq1	hrq1	YDR539W	FDC1		0.82577	0.053	0.97597	0.04	-0.14159	0.052	7e-05
hrq1	hrq1	YBR118W	TEF2		0.84631	0.033	0.98073	0.046	-0.14144	0.033	2e-05
hrq1	hrq1	YCL016C	DCC1		0.76763	0.107	0.89737	0.045	-0.14137	0.107	0.00073
hrq1	hrq1	YNL130C	CPT1		0.87329	0.097	1.01011	0.025	-0.14094	0.097	0.00038
hrq1	hrq1	YIL024C	YIL024C		0.87256	0.078	1.01285	0.017	-0.14063	0.078	0.0002
hrq1	hrq1	YPL157W	TGS1		0.66858	0.069	0.81289	0.026	-0.14035	0.069	0.0003
hrq1	hrq1	YDR409W	SIZ1		0.87763	0.147	1.01801	0.04	-0.13839	0.147	0.00127
hrq1	hrq1	YMR159C	ATG16		0.86756	0.078	1.00506	0.028	-0.13804	0.078	0.0002
hrq1	hrq1	YGR212W	SLI1		0.96796	0.032	1.10916	0.028	-0.13715	0.032	0.00037	status=JK
hrq1	hrq1	YFR011C	AIM13		0.8744	0.065	1.01162	0.016	-0.13689	0.065	0.00011
hrq1	hrq1	YPL048W	CAM1		0.46553	0.053	0.59647	0.009	-0.13608	0.053	0.00041
hrq1	hrq1	YDR120C	TRM1		0.99447	0.039	1.13338	0.045	-0.13503	0.039	2e-05
hrq1	hrq1	YGL250W	RMR1		0.80186	0.072	0.93422	0.011	-0.13472	0.072	0.0002
hrq1	hrq1	YBR147W	RTC2		0.94048	0.105	1.07262	0.013	-0.13414	0.105	0.00038
hrq1	hrq1	YCR033W	SNT1		0.82881	0.019	0.96321	0.004	-0.13319	0.019	0
hrq1	hrq1	YER120W	SCS2		0.72589	0.071	0.85797	0.046	-0.13209	0.071	0.00025
hrq1	hrq1	YGL020C	GET1		0.86902	0.172	1.00181	0.023	-0.13166	0.172	0.00206
hrq1	hrq1	YLR131C	ACE2		0.77328	0.064	0.87119	0.162	-0.13091	0.064	0.00015
hrq1	hrq1	YLR079W	SIC1		0.52166	0.043	0.65638	0.023	-0.13051	0.043	0.00015
hrq1	hrq1	YBR171W	SEC66		0.84739	0.11	0.97381	0.009	-0.13039	0.11	0.00059
hrq1	hrq1	YDR125C	ECM18		1.06194	0.031	1.1995	0.042	-0.12994	0.031	1e-05
hrq1	hrq1	YLR418C	CDC73		0.86198	0.014	0.99898	0.036	-0.1298	0.014	0
hrq1	hrq1	YBL088C	TEL1		0.8778	0.117	0.99614	0.036	-0.1295	0.117	0.00065
hrq1	hrq1	YCR062W	YCR062W		0.898	0.098	1.02221	0.017	-0.12947	0.098	0.00035
hrq1	hrq1	YDL070W	BDF2		0.6703	0.028	0.81892	0.035	-0.12929	0.028	0.00058	status=JK
hrq1	hrq1	YMR250W	GAD1		0.79269	0.04	0.93472	0.045	-0.12878	0.04	4e-05
hrq1	hrq1	YGL194C	HOS2		0.84781	0.026	0.97265	0.008	-0.12836	0.026	1e-05
hrq1	hrq1	YPR173C	VPS4		0.64514	0.071	0.78627	0.061	-0.12779	0.071	0.00036
hrq1	hrq1	YOR033C	EXO1		0.91374	0.018	1.03195	0.04	-0.12754	0.018	0.00012	status=JK
hrq1	hrq1	YMR017W	SPO20		0.86909	0.156	1.00313	0.017	-0.12742	0.156	0.00156
hrq1	hrq1	YDR110W	FOB1		1.0342	0.022	1.16623	0.022	-0.12713	0.022	0.00015	status=JK
hrq1	hrq1	YHL044W	YHL044W		0.90751	0.109	1.0284	0.031	-0.12695	0.109	0.00047
hrq1	hrq1	YPL182C	YPL182C		0.95639	0.015	1.08591	0.021	-0.12689	0.015	8e-05	status=JK
hrq1	hrq1	YOR191W	ULS1		0.88066	0.018	1.00731	0.017	-0.12648	0.018	0.00014	status=JK
hrq1	hrq1	YLR342W	FKS1		0.63524	0.04	0.76267	0.043	-0.12615	0.04	0.00135	status=JK
hrq1	hrq1	YIL056W	VHR1		0.88254	0.077	1.00282	0.057	-0.12582	0.077	0.00018
hrq1	hrq1	YGR055W	MUP1		0.71613	0.055	0.84693	0.021	-0.12532	0.055	0.00013
hrq1	hrq1	YHR198C	AIM18		0.851	0.025	0.9724	0.033	-0.12501	0.025	0.00029	status=JK
hrq1	hrq1	YOR219C	STE13		0.89677	0.071	1.01284	0.084	-0.12479	0.071	0.00014
hrq1	hrq1	YGR238C	KEL2		0.8358	0.3	0.94829	0.064	-0.12468	0.3	0.01144
hrq1	hrq1	YMR199W	CLN1		0.90274	0.043	1.02565	0.038	-0.12454	0.043	3e-05
hrq1	hrq1	YGL219C	MDM34		0.72501	0.093	0.84814	0.005	-0.1243	0.093	0.00057
hrq1	hrq1	YOR355W	GDS1		0.76843	0.063	0.88646	0.039	-0.12415	0.063	0.00015
hrq1	hrq1	YNL117W	MLS1		0.67316	0.028	0.82537	0.139	-0.12358	0.028	0.00059	status=JK
hrq1	hrq1	YNR045W	PET494		0.91486	0.07	1.02946	0.014	-0.12337	0.07	0.00012
hrq1	hrq1	YGL066W	SGF73		0.70247	0.019	0.8239	0.014	-0.12332	0.019	0.00025	status=JK
hrq1	hrq1	YDR465C	RMT2		0.88357	0.155	1.00438	0.027	-0.12301	0.155	0.00146
hrq1	hrq1	YKL085W	MDH1		0.86314	0.175	0.98891	0.046	-0.122	0.175	0.00221
hrq1	hrq1	YDR532C	KRE28		0.31068	0.037	0.41184	0.062	-0.12117	0.037	0.00047
hrq1	hrq1	YFL049W	SWP82		0.91405	0.021	1.03459	0.002	-0.12035	0.021	0.00018	status=JK
hrq1	hrq1	YHR077C	NMD2		0.92584	0.063	1.04696	0.03	-0.11995	0.063	9e-05
hrq1	hrq1	YPL270W	MDL2		0.92731	0.122	1.00527	0.077	-0.11886	0.122	0.00062
hrq1	hrq1	YPL226W	NEW1		0.7328	0.113	0.85556	0.052	-0.1187	0.112	0.00098
hrq1	hrq1	YJL079C	PRY1		0.93779	0.123	1.05047	0.026	-0.11863	0.122	0.00061
hrq1	hrq1	YPL180W	TCO89		0.47683	0.016	0.60634	0.051	-0.11856	0.016	0.00039	status=JK
hrq1	hrq1	YPL258C	THI21		0.90239	0.068	1.01605	0.02	-0.11847	0.068	0.00012
hrq1	hrq1	YLR225C	YLR225C		0.83826	0.166	0.93514	0.077	-0.11828	0.165	0.00205
hrq1	hrq1	YKR028W	SAP190		0.89315	0.019	1.00665	0.02	-0.11794	0.019	0.00015	status=JK
hrq1	hrq1	YOR156C	NFI1		0.90701	0.072	1.02263	0.03	-0.11774	0.072	0.00014
hrq1	hrq1	YOR005C	DNL4		0.97319	0.05	1.09338	0.015	-0.11734	0.05	4e-05
hrq1	hrq1	YMR166C	YMR166C		0.7888	0.081	0.90307	0.025	-0.1164	0.081	0.0003
hrq1	hrq1	YDR174W	HMO1		0.1926	0.004	0.30716	0.029	-0.1163	0.004	0.00016	status=JK
hrq1	hrq1	YDR098C	GRX3		1.02567	0.055	1.1453	0.051	-0.11625	0.055	4e-05
hrq1	hrq1	YLR214W	FRE1		0.88603	0.012	1.01185	0.037	-0.11602	0.012	6e-05	status=JK
hrq1	hrq1	YLR248W	RCK2		0.90558	0.033	1.01187	0.047	-0.11591	0.033	0.00044	status=JK
hrq1	hrq1	YBL079W	NUP170		0.67053	0.161	0.79017	0.08	-0.11571	0.161	0.00363
hrq1	hrq1	YMR158C-A	YMR158C-A		0.91489	0.056	1.03179	0.063	-0.11525	0.056	6e-05
hrq1	hrq1	YMR173W-A	YMR173W-A		0.90885	0.146	1.01589	0.039	-0.11486	0.146	0.00112
hrq1	hrq1	YGR111W	YGR111W		0.91784	0.11	1.03961	0.026	-0.1148	0.11	0.00047
hrq1	hrq1	YDL059C	RAD59		0.95648	0.068	1.07736	0.049	-0.11475	0.067	0.0001
hrq1	hrq1	YMR306W	FKS3		0.9129	0.061	1.02397	0.04	-0.11469	0.06	8e-05
hrq1	hrq1	YPL034W	YPL034W		0.95171	0.038	1.06324	0.025	-0.11431	0.038	2e-05
hrq1	hrq1	YOL098C	YOL098C		0.92268	0.018	1.03726	0.039	-0.11409	0.018	0.00013	status=JK
hrq1	hrq1	YJL047C	RTT101		0.84302	0.022	0.95176	0.012	-0.11361	0.022	0
hrq1	hrq1	YDR420W	HKR1		0.94808	0.254	1.04941	0.056	-0.11337	0.254	0.00497
hrq1	hrq1	YDR461W	MFA1		0.88762	0.087	1.00053	0.004	-0.1133	0.087	0.00026
hrq1	hrq1	YDR441C	APT2		0.86713	0.135	0.97911	0.079	-0.11298	0.135	0.00101
hrq1	hrq1	YAL058C-A	YAL058C-A		0.87124	0.078	0.98312	0.032	-0.1127	0.078	0.0002
hrq1	hrq1	YOL089C	HAL9		0.89869	0.042	1.00834	0.005	-0.11231	0.042	3e-05
hrq1	hrq1	YOL107W	YOL107W		0.92181	0.119	1.03796	0.023	-0.11205	0.119	0.00059
hrq1	hrq1	YOR182C	RPS30B		0.6146	0.061	0.71777	0.046	-0.11197	0.061	0.00027
hrq1	hrq1	YBR018C	GAL7		0.89072	0.032	0.99948	0.031	-0.11167	0.032	0.00042	status=JK
hrq1	hrq1	YKL139W	CTK1		0.69319	0.094	0.81306	0.025	-0.11066	0.093	0.00067
hrq1	hrq1	YML028W	TSA1		0.79103	0.048	0.89855	0.01	-0.10896	0.048	6e-05
hrq1	hrq1	YDL149W	ATG9		0.88323	0.2	0.9873	0.038	-0.10842	0.2	0.00307
hrq1	hrq1	YBR205W	KTR3		0.92789	0.014	1.03285	0.035	-0.10837	0.014	8e-05	status=JK
hrq1	hrq1	YPR194C	OPT2		0.85215	0.04	0.96923	0.08	-0.10819	0.04	0.00072	status=JK
hrq1	hrq1	YBL049W	MOH1		0.95675	0.026	1.06343	0.03	-0.10786	0.026	0.00024	status=JK
hrq1	hrq1	YNR074C	AIF1		0.92624	0.123	1.03172	0.032	-0.10746	0.122	0.00063
hrq1	hrq1	YDL053C	PBP4		0.90611	0.019	1.00881	0.034	-0.10718	0.019	0.00015	status=JK
hrq1	hrq1	YMR154C	RIM13		0.77959	0.115	0.89042	0.029	-0.10717	0.115	0.00087
hrq1	hrq1	YJR149W	YJR149W		0.92512	0.11	1.02558	0.035	-0.1068	0.11	0.00046
hrq1	hrq1	YJL106W	IME2		0.90046	0.026	1.00754	0.019	-0.10662	0.026	0.00029	status=JK
hrq1	hrq1	YPL140C	MKK2		0.81401	0.074	0.91849	0.005	-0.10645	0.074	0.00021
hrq1	hrq1	YGR072W	UPF3		0.8987	0.089	0.99461	0.036	-0.10559	0.089	0.00026
hrq1	hrq1	YGR181W	TIM13		0.90375	0.11	1.0129	0.028	-0.10552	0.11	0.00049
hrq1	hrq1	YLR102C	APC9		0.90642	0.169	1.00903	0.062	-0.10484	0.169	0.00172
hrq1	hrq1	YPR106W	ISR1		0.94648	0.039	1.04353	0.04	-0.10463	0.039	2e-05
hrq1	hrq1	YKL041W	VPS24		0.61193	0.078	0.71049	0.022	-0.10443	0.078	0.00056
hrq1	hrq1	YMR209C	YMR209C		0.90553	0.117	1.00993	0.041	-0.10435	0.117	0.00058
hrq1	hrq1	YGL180W	ATG1		0.89656	0.036	0.99262	0.047	-0.10413	0.036	2e-05
hrq1	hrq1	YGR058W	PEF1		0.89074	0.057	0.9992	0.021	-0.10401	0.057	7e-05
hrq1	hrq1	YOR227W	HER1		0.90061	0.06	1.00214	0.007	-0.10384	0.06	8e-05
hrq1	hrq1	YIL159W	BNR1		0.11127	0.033	0.21526	0.024	-0.10377	0.033	0.02851	status=JK
hrq1	hrq1	YMR144W	YMR144W		0.88791	0.082	0.99512	0.011	-0.10362	0.082	0.00021
hrq1	hrq1	YOL081W	IRA2		0.76291	0.052	0.8714	0.063	-0.10328	0.052	0.00152	status=JK
hrq1	hrq1	YDR111C	ALT2		0.99697	0.063	1.10495	0.026	-0.10278	0.063	7e-05
hrq1	hrq1	YIL009C-A	EST3		0.9857	0.046	1.09104	0.01	-0.10231	0.046	3e-05
hrq1	hrq1	YDR061W	YDR061W		0.99105	0.07	1.08942	0.022	-0.10206	0.07	0.0001
hrq1	hrq1	YNR058W	BIO3		0.90673	0.075	1.01561	0.03	-0.10193	0.075	0.00015
hrq1	hrq1	YFL033C	RIM15		0.89589	0.103	1.00107	0.07	-0.10191	0.103	0.00042
hrq1	hrq1	YDR126W	SWF1		0.95115	0.024	1.04758	0.037	-0.10183	0.024	0
hrq1	hrq1	YPL058C	PDR12		0.98555	0.044	1.08754	0.058	-0.10179	0.044	2e-05
hrq1	hrq1	YNL099C	OCA1		0.89886	0.123	0.98217	0.056	-0.10151	0.123	0.0007
hrq1	hrq1	YKL077W	YKL077W		0.98317	0.003	1.08179	0.014	-0.10118	0.003	0	status=JK
hrq1	hrq1	YML013W	UBX2		0.904	0.057	1.00469	0.001	-0.10044	0.057	7e-05
hrq1	hrq1	YDR503C	LPP1		0.86163	0.189	0.96568	0.118	-0.1004	0.189	0.00278
hrq1	hrq1	YJR133W	XPT1		0.91283	0.001	1.00097	0.042	-0.10038	0.001	0	status=JK
hrq1	hrq1	YMR148W	OSW5		0.86851	0.023	0.95831	0.032	-0.10019	0.022	0.00022	status=JK
hrq1	hrq1	YOL108C	INO4		0.46011	0.03	0.55145	0.043	-0.10009	0.03	0.00142	status=JK
hrq1	hrq1	YMR163C	INP2		0.85389	0.004	0.95239	0.02	-0.09953	0.004	0
hrq1	hrq1	YDR469W	SDC1		0.81642	0.072	0.91074	0.026	-0.0995	0.072	0.00019
hrq1	hrq1	YER151C	UBP3		0.74169	0.123	0.84421	0.024	-0.0991	0.123	0.00123
hrq1	hrq1	YDR096W	GIS1		0.99236	0.013	1.09056	0.022	-0.09907	0.013	5e-05	status=JK
hrq1	hrq1	YDR097C	MSH6		0.95081	0.052	1.04831	0.003	-0.0989	0.052	5e-05
hrq1	hrq1	YDR123C	INO2		0.68557	0.047	0.78296	0.042	-0.0986	0.047	9e-05
hrq1	hrq1	YIL122W	POG1		0.85201	0.091	0.94319	0.034	-0.09856	0.091	0.00033
hrq1	hrq1	YOL006C	TOP1		0.65993	0.027	0.74622	0.043	-0.09848	0.027	0.00054	status=JK
hrq1	hrq1	YDR094W	YDR094W		0.91068	0.131	1.01242	0.029	-0.09747	0.131	0.00081
hrq1	hrq1	YMR215W	GAS3		0.90229	0.061	0.99591	0.007	-0.09727	0.061	9e-05
hrq1	hrq1	YLR084C	RAX2		0.85196	0.087	0.93618	0.042	-0.0967	0.087	0.00029
hrq1	hrq1	YLR335W	NUP2		0.96132	0.046	1.05479	0.041	-0.09532	0.046	3e-05
hrq1	hrq1	YBR137W	YBR137W		0.8891	0.05	0.98077	0.024	-0.09532	0.05	5e-05
hrq1	hrq1	YDL171C	GLT1		0.88457	0.257	0.98192	0.043	-0.09494	0.257	0.00627
hrq1	hrq1	YDR108W	TRS85		0.87966	0.073	0.97062	0.018	-0.0949	0.073	0.00016
hrq1	hrq1	YOR070C	GYP1		0.74093	0.121	0.83833	0.067	-0.09451	0.121	0.00118
hrq1	hrq1	YDR411C	DFM1		0.94131	0.21	1.03633	0.002	-0.09404	0.209	0.00291
hrq1	hrq1	YER174C	GRX4		0.91913	0.103	1.01239	0.024	-0.09401	0.103	0.00038
hrq1	hrq1	YDR159W	SAC3		0.46009	0.162	0.55452	0.057	-0.09372	0.162	0.01082
hrq1	hrq1	YML113W	DAT1		0.92998	0.011	1.02521	0.015	-0.09363	0.011	5e-05	status=JK
hrq1	hrq1	YPL127C	HHO1		0.90617	0.109	1.01149	0.05	-0.09349	0.109	0.00048
hrq1	hrq1	YGL195W	GCN1		0.91301	0.087	1.00425	0.008	-0.09345	0.087	0.00024
hrq1	hrq1	YBR105C	VID24		0.86878	0.084	0.9684	0.033	-0.09343	0.084	0.00025
hrq1	hrq1	YOR179C	SYC1		0.68581	0.07	0.78543	0.016	-0.09322	0.07	0.00029
hrq1	hrq1	YLR450W	HMG2		0.88852	0.097	0.98215	0.025	-0.09305	0.096	0.00035
hrq1	hrq1	YLR092W	SUL2		0.93321	0.023	1.03752	0.05	-0.09299	0.023	0.0002	status=JK
hrq1	hrq1	YDL061C	RPS29B		0.77731	0.122	0.87307	0.018	-0.09273	0.122	0.00104
hrq1	hrq1	YKR082W	NUP133		0.66732	0.218	0.77432	0.068	-0.09265	0.217	0.00871
hrq1	hrq1	YOL016C	CMK2		1.00939	0.007	1.1003	0.01	-0.0926	0.007	2e-05	status=JK
hrq1	hrq1	YGL218W	YGL218W		0.39784	0.068	0.48459	0.033	-0.09242	0.068	0.00134
hrq1	hrq1	YOL090W	MSH2		0.80992	0.042	0.8953	0.043	-0.09214	0.042	0.00088	status=JK
hrq1	hrq1	YGL043W	DST1		0.64121	0.16	0.72612	0.206	-0.09193	0.16	0.00406
hrq1	hrq1	YDL012C	YDL012C		0.91089	0.035	0.99863	0.014	-0.09189	0.035	2e-05
hrq1	hrq1	YHR133C	NSG1		0.95136	0.019	1.03756	0.035	-0.09178	0.019	0
hrq1	hrq1	YJL145W	SFH5		0.94322	0.092	1.03434	0.015	-0.09174	0.092	0.00025
hrq1	hrq1	YNR060W	FRE4		0.86507	0.164	0.95286	0.067	-0.09164	0.164	0.00182
hrq1	hrq1	YAR023C	YAR023C		0.97158	0.016	1.05902	0.081	-0.09162	0.016	9e-05	status=JK
hrq1	hrq1	YFR031C-A	RPL2A		0.89492	0.011	0.98947	0.011	-0.09149	0.011	5e-05	status=JK
hrq1	hrq1	YIL161W	YIL161W		0.90994	0.043	1.01712	0.113	-0.09146	0.043	3e-05
hrq1	hrq1	YLR063W	YLR063W		0.92039	0.099	1.0207	0.048	-0.09146	0.099	0.00034
hrq1	hrq1	YIL011W	TIR3		0.09389	0.056	0.18098	0.026	-0.0912	0.056	0.04311
hrq1	hrq1	YGR154C	GTO1		0.93538	0.072	1.01664	0.049	-0.09076	0.072	0.00012
hrq1	hrq1	YML012W	ERV25		0.96698	0.077	1.05306	0.027	-0.09066	0.077	0.00014
hrq1	hrq1	YKL064W	MNR2		0.89336	0.013	0.98309	0.073	-0.09018	0.013	7e-05	status=JK
hrq1	hrq1	YBR267W	REI1		0.36268	0.015	0.451	0.072	-0.08997	0.015	0.00056	status=JK
hrq1	hrq1	YCR059C	YIH1		0.97083	0.024	1.05943	0.031	-0.08991	0.024	0
hrq1	hrq1	YOR301W	RAX1		0.97933	0.013	1.05662	0.048	-0.08982	0.013	6e-05	status=JK
hrq1	hrq1	YMR129W	POM152		0.98755	0.012	1.08224	0.024	-0.08976	0.012	5e-05	status=JK
hrq1	hrq1	YGL248W	PDE1		0.85746	0.129	0.94994	0.058	-0.08955	0.129	0.00093
hrq1	hrq1	YIL053W	RHR2		0.93897	0.087	1.01682	0.05	-0.08911	0.087	0.00022
hrq1	hrq1	YCL023C	YCL023C		0.92981	0.045	1.01329	0.063	-0.08885	0.045	3e-05
hrq1	hrq1	YMR158W-A	YMR158W-A		0.95808	0.014	1.04853	0.019	-0.08883	0.014	7e-05	status=JK
hrq1	hrq1	YER119C-A	YER119C-A		0.8285	0.075	0.91069	0.032	-0.08852	0.075	0.0002
hrq1	hrq1	YNL013C	YNL013C		0.89299	0.037	0.98476	0.031	-0.08838	0.037	2e-05
hrq1	hrq1	YOL045W	PSK2		0.93633	0.023	1.03437	0.036	-0.08832	0.023	0.0002	status=JK
hrq1	hrq1	YOR313C	SPS4		0.59318	0.067	0.6805	0.001	-0.08785	0.067	0.0004
hrq1	hrq1	YDR077W	SED1		0.99619	0.044	1.08611	0.023	-0.08761	0.044	2e-05
hrq1	hrq1	YAR040C	YAR040C		0.89588	0.046	0.98363	0.03	-0.08754	0.046	4e-05
hrq1	hrq1	YHR203C	RPS4B		0.83686	0.07	0.92466	0.034	-0.08739	0.07	0.00016
hrq1	hrq1	YMR147W	YMR147W		0.955	0.101	1.04956	0.047	-0.08729	0.101	0.00032
hrq1	hrq1	YKL048C	ELM1		0.66822	0.007	0.75496	0.011	-0.08725	0.007	3e-05	status=JK
hrq1	hrq1	YGR225W	AMA1		0.92566	0.143	1.01073	0.01	-0.08696	0.143	0.00099
hrq1	hrq1	YPL156C	PRM4		0.92351	0.022	0.99979	0.051	-0.08696	0.022	0.0002	status=JK
hrq1	hrq1	YER180C	ISC10		0.95914	0.136	1.04324	0.011	-0.08692	0.136	0.00077
hrq1	hrq1	YPR007C	REC8		0.94842	0.019	1.03412	0.012	-0.08673	0.019	0.00013	status=JK
hrq1	hrq1	YOL012C	HTZ1		0.81055	0.022	0.89601	0.025	-0.08672	0.022	1e-05
hrq1	hrq1	YFL023W	BUD27		0.79135	0.059	0.88185	0.026	-0.08671	0.059	0.00011
hrq1	hrq1	YLL012W	YEH1		0.94257	0.081	1.01409	0.06	-0.08656	0.08	0.00017
hrq1	hrq1	YJL148W	RPA34		0.75995	0.029	0.8476	0.005	-0.08624	0.029	1e-05
hrq1	hrq1	YAR031W	PRM9		0.94765	0.034	1.0376	0.019	-0.08604	0.034	1e-05
hrq1	hrq1	YDL039C	PRM7		1.02276	0.099	1.10744	0.028	-0.0859	0.099	0.00025
hrq1	hrq1	YMR245W	YMR245W		0.8624	0.248	0.96248	0.09	-0.08587	0.247	0.00607
hrq1	hrq1	YML074C	FPR3		0.94391	0.05	1.02913	0.009	-0.08568	0.05	4e-05
hrq1	hrq1	YGR131W	FHN1		0.96324	0.124	1.04747	0.014	-0.08546	0.124	0.00058
hrq1	hrq1	YOL136C	PFK27		0.91905	0.048	0.98647	0.052	-0.08516	0.048	4e-05
hrq1	hrq1	YLR111W	YLR111W		0.74759	0.137	0.85018	0.062	-0.085	0.137	0.00165
hrq1	hrq1	YKL115C	YKL115C		0.94169	0.09	1.0161	0.054	-0.08461	0.09	0.00024
hrq1	hrq1	YML096W	YML096W		0.92047	0.069	0.99794	0.029	-0.08453	0.069	0.00012
hrq1	hrq1	YOR108W	LEU9		0.88992	0.015	0.97588	0.038	-0.08441	0.015	9e-05	status=JK
hrq1	hrq1	YLR020C	YEH2		0.97157	0.047	1.05599	0.027	-0.0844	0.047	3e-05
hrq1	hrq1	YAL026C	DRS2		0.66008	0.096	0.74847	0.034	-0.08412	0.096	0.00083
hrq1	hrq1	YER081W	SER3		0.92635	0.015	1.00943	0.005	-0.0841	0.015	9e-05	status=JK
hrq1	hrq1	YBR058C	UBP14		0.9327	0.004	1.02326	0.027	-0.08409	0.004	1e-05	status=JK
hrq1	hrq1	YBL078C	ATG8		0.87497	0.055	0.96041	0.035	-0.08384	0.055	7e-05
hrq1	hrq1	YIL153W	RRD1		0.91509	0.045	1.00073	0.005	-0.08343	0.045	3e-05
hrq1	hrq1	YKL175W	ZRT3		0.98692	0.059	1.07153	0.039	-0.08343	0.059	6e-05
hrq1	hrq1	YER113C	TMN3		1.01155	0.06	1.0863	0.033	-0.08342	0.059	6e-05
hrq1	hrq1	YBR301W	PAU24		0.89232	0.101	0.97371	0.007	-0.08327	0.101	0.00039
hrq1	hrq1	YDR537C	YDR537C		0.96308	0.078	1.04958	0.028	-0.08314	0.078	0.00014
hrq1	hrq1	YNL127W	FAR11		0.91087	0.086	0.99235	0.01	-0.08299	0.086	0.00023
hrq1	hrq1	YPR148C	YPR148C		0.98165	0.013	1.06075	0.016	-0.08287	0.013	6e-05	status=JK
hrq1	hrq1	YLR015W	BRE2		0.83144	0.021	0.91989	0.02	-0.08281	0.021	0
hrq1	hrq1	YMR152W	YIM1		0.91511	0.143	1.00464	0.014	-0.08251	0.142	0.00102
hrq1	hrq1	YML109W	ZDS2		0.8865	0.205	0.97053	0.038	-0.08238	0.204	0.00323
hrq1	hrq1	YDR036C	EHD3		0.93501	0.038	1.01516	0.045	-0.08236	0.038	2e-05
hrq1	hrq1	YOR269W	PAC1		0.90202	0.153	0.98044	0.007	-0.0823	0.153	0.00132
hrq1	hrq1	YOR059C	YOR059C		0.94377	0.037	1.03205	0.03	-0.0822	0.037	2e-05
hrq1	hrq1	YML047C	PRM6		0.98338	0.087	1.06602	0.008	-0.08211	0.087	0.00019
hrq1	hrq1	YNL003C	PET8		1.01053	0.022	1.096	0.038	-0.08193	0.022	0.00016	status=JK
hrq1	hrq1	YJR124C	YJR124C		0.92037	0.061	1.00833	0.036	-0.08192	0.061	8e-05
hrq1	hrq1	YLR093C	NYV1		0.92207	0.112	1.00553	0.003	-0.08191	0.112	0.00049
hrq1	hrq1	YLR238W	FAR10		0.91451	0.009	0.99979	0.015	-0.08182	0.009	3e-05	status=JK
hrq1	hrq1	YBR032W	YBR032W		0.9028	0.086	0.98157	0.038	-0.08158	0.086	0.00023
hrq1	hrq1	YOR093C	YOR093C		0.76139	0.024	0.8517	0.04	-0.08086	0.024	0.00032	status=JK
hrq1	hrq1	YPR195C	YPR195C		1.06912	0.021	0.99052	0.016	0.08017	0.02	0
hrq1	hrq1	YOL018C	TLG2		0.88747	0.004	0.80178	0.011	0.08027	0.004	1e-05	status=JK
hrq1	hrq1	YHR048W	YHK8		1.06064	0.027	0.98082	0.024	0.08046	0.027	0.00022	status=JK
hrq1	hrq1	YOR171C	LCB4		1.08464	0.025	1.00369	0.02	0.08052	0.025	0
hrq1	hrq1	YCL029C	BIK1		1.06895	0.024	0.98781	0.004	0.0807	0.024	0
hrq1	hrq1	YHR123W	EPT1		1.17209	0.058	1.08682	0.044	0.08111	0.058	0.0008	status=JK
hrq1	hrq1	YGR108W	CLB1		1.15311	0.028	1.07198	0.013	0.08115	0.028	0.00019	status=JK
hrq1	hrq1	YLR360W	VPS38		1.00761	0.012	0.93008	0.019	0.08124	0.012	5e-05	status=JK
hrq1	hrq1	YOL085C	YOL085C		0.93751	0.03	0.85378	0.045	0.08151	0.03	0.00035	status=JK
hrq1	hrq1	YLR018C	POM34		1.07781	0.125	1.00436	0.039	0.08166	0.125	0.00042
hrq1	hrq1	YHR195W	NVJ1		1.09056	0.006	1.00814	0.019	0.08169	0.006	1e-05	status=JK
hrq1	hrq1	YCL001W-A	YCL001W-A		1.07765	0.003	0.99377	0.009	0.08196	0.003	0
hrq1	hrq1	YER091C	MET6		1.10497	0.138	1.02037	0.017	0.08201	0.137	0.00052
hrq1	hrq1	YPR096C	YPR096C		1.04832	0.048	0.96485	0.003	0.08201	0.048	3e-05
hrq1	hrq1	YNL020C	ARK1		1.0633	0.108	0.98661	0.031	0.08208	0.108	0.00028
hrq1	hrq1	YGL253W	HXK2		0.99432	0.05	0.9113	0.012	0.0821	0.05	3e-05
hrq1	hrq1	YMR070W	MOT3		1.06868	0.053	0.99147	0.033	0.08231	0.053	3e-05
hrq1	hrq1	YOL025W	LAG2		1.02851	0.06	0.94448	0.023	0.08236	0.059	5e-05
hrq1	hrq1	YCL032W	STE50		0.68523	0.019	0.60408	0.042	0.08285	0.019	1e-05
hrq1	hrq1	YCR014C	POL4		1.07955	0.111	1.00304	0.057	0.08293	0.111	0.0003
hrq1	hrq1	YCR050C	YCR050C		1.09441	0.026	1.00971	0.02	0.08297	0.026	0
hrq1	hrq1	YIL095W	PRK1		1.06971	0.018	0.98742	0.011	0.08299	0.018	0.0001	status=JK
hrq1	hrq1	YML032C	RAD52		0.84689	0.024	0.76389	0.022	0.08339	0.024	0.00028	status=JK
hrq1	hrq1	YAL066W	YAL066W		1.05668	0.039	0.97932	0.05	0.0834	0.039	1e-05
hrq1	hrq1	YLL049W	LDB18		1.05648	0.059	0.96911	0.047	0.08345	0.058	5e-05
hrq1	hrq1	YER121W	YER121W		1.03896	0.027	0.95694	0.011	0.08354	0.027	0.00022	status=JK
hrq1	hrq1	YDL237W	AIM6		0.96716	0.053	0.88888	0.07	0.08377	0.053	4e-05
hrq1	hrq1	YLR290C	YLR290C		0.97651	0.052	0.89348	0.023	0.08383	0.052	4e-05
hrq1	hrq1	YGL226W	MTC3		1.04563	0.049	0.96211	0.01	0.08384	0.049	3e-05
hrq1	hrq1	YER178W	PDA1		0.85949	0.02	0.77845	0.011	0.08384	0.02	0.00018	status=JK
hrq1	hrq1	YOL004W	SIN3		0.93552	0.004	0.84681	0.039	0.08391	0.004	1e-05	status=JK
hrq1	hrq1	YPL183C	RTT10		1.00645	0.008	0.92446	0.045	0.08403	0.008	2e-05	status=JK
hrq1	hrq1	YHR152W	SPO12		1.11864	0.042	1.02973	0.027	0.08407	0.042	1e-05
hrq1	hrq1	YBL103C	RTG3		1.0721	0.035	0.98505	0.012	0.08409	0.035	0.00036	status=JK
hrq1	hrq1	YKL167C	MRP49		1.05834	0.071	0.9738	0.014	0.08412	0.071	8e-05
hrq1	hrq1	YDR179C	CSN9		1.02265	0.031	0.9429	0.023	0.08416	0.031	0.00031	status=JK
hrq1	hrq1	YGL258W	VEL1		1.10468	0.068	1.02121	0.023	0.08418	0.068	6e-05
hrq1	hrq1	YGL085W	LCL3		1.10442	0.017	1.02575	0.029	0.08433	0.017	8e-05	status=JK
hrq1	hrq1	YMR310C	YMR310C		1.07743	0.044	0.98838	0.095	0.08438	0.044	0.00057	status=JK
hrq1	hrq1	YDL088C	ASM4		1.09967	0.104	0.99934	0.059	0.08445	0.103	0.00023
hrq1	hrq1	YBR210W	ERV15		1.10896	0.02	1.02974	0.023	0.0849	0.02	0
hrq1	hrq1	YLR393W	ATP10		0.9775	0.041	0.8935	0.019	0.08493	0.041	2e-05
hrq1	hrq1	YDR533C	HSP31		1.07814	0.04	1.00021	0.039	0.08494	0.04	1e-05
hrq1	hrq1	YGR059W	SPR3		1.16012	0.091	1.07283	0.037	0.08516	0.091	0.00013
hrq1	hrq1	YGR178C	PBP1		0.99795	0.016	0.92636	0.063	0.08522	0.016	9e-05	status=JK
hrq1	hrq1	YMR123W	PKR1		0.94969	0.058	0.86114	0.012	0.08541	0.058	6e-05
hrq1	hrq1	YPL263C	KEL3		0.99258	0.069	0.89635	0.045	0.08574	0.069	9e-05
hrq1	hrq1	YHR126C	ANS1		1.07651	0.079	0.992	0.009	0.08598	0.079	0.00011
hrq1	hrq1	YML070W	DAK1		0.96765	0.285	0.86114	0.088	0.08605	0.284	0.00651
hrq1	hrq1	YML076C	WAR1		1.09216	0.045	1.00333	0.009	0.08616	0.045	2e-05
hrq1	hrq1	YLR261C	YLR261C		0.83925	0.035	0.753	0.018	0.08627	0.035	2e-05
hrq1	hrq1	YLR434C	YLR434C		1.0969	0.116	1.01069	0.027	0.08636	0.116	0.00032
hrq1	hrq1	YLR386W	VAC14		1.08891	0.091	1.00209	0.031	0.08639	0.091	0.00016
hrq1	hrq1	YGL114W	YGL114W		0.87805	0.131	0.78958	0.019	0.08645	0.13	0.00089
hrq1	hrq1	YLR341W	SPO77		1.07633	0.076	0.99818	0.035	0.0865	0.076	0.0001
hrq1	hrq1	YDR080W	VPS41		0.56241	0.336	0.46803	0.199	0.08661	0.336	0.04429
hrq1	hrq1	YLR144C	ACF2		1.09624	0.054	1.01139	0.019	0.08694	0.054	3e-05
hrq1	hrq1	YBR217W	ATG12		1.10399	0.011	1.01151	0.029	0.08736	0.011	3e-05	status=JK
hrq1	hrq1	YLL060C	GTT2		1.04577	0.052	0.96031	0.007	0.08749	0.052	3e-05
hrq1	hrq1	YCR105W	ADH7		0.77895	0.066	0.69087	0.01	0.08752	0.066	0.00017
hrq1	hrq1	YDR482C	CWC21		1.10948	0.073	0.98895	0.103	0.08754	0.073	0.00143	status=JK
hrq1	hrq1	YKL148C	SDH1		1.04849	0.071	0.97024	0.026	0.08757	0.071	8e-05
hrq1	hrq1	YPL037C	EGD1		1.04683	0.001	0.96906	0.018	0.08768	0.001	0	status=JK
hrq1	hrq1	YLR185W	RPL37A		0.75904	0.133	0.69124	0.119	0.08771	0.133	0.00145
hrq1	hrq1	YPL008W	CHL1		1.0826	0.046	0.99312	0.006	0.08777	0.046	2e-05
hrq1	hrq1	YDL190C	UFD2		1.06539	0.066	0.98959	0.059	0.08783	0.066	6e-05
hrq1	hrq1	YPR149W	NCE102		1.06404	0.066	0.97431	0.003	0.08793	0.066	6e-05
hrq1	hrq1	YDR076W	RAD55		1.01861	0.074	0.92649	0.008	0.08817	0.074	0.00011
hrq1	hrq1	YKL171W	NNK1		1.05698	0.085	0.96399	0.035	0.08836	0.085	0.00014
hrq1	hrq1	YBL103C	RTG3		0.77972	0.025	0.69133	0.005	0.08873	0.025	1e-05
hrq1	hrq1	YBR077C	SLM4		1.1416	0.058	1.04737	0.011	0.08873	0.058	4e-05
hrq1	hrq1	YJR033C	RAV1		0.97398	0.044	0.88618	0.039	0.08883	0.044	3e-05
hrq1	hrq1	YAR018C	KIN3		0.99952	0.081	0.91243	0.007	0.08887	0.081	0.00015
hrq1	hrq1	YOL056W	GPM3		1.05827	0.013	0.97229	0.011	0.08892	0.013	5e-05	status=JK
hrq1	hrq1	YNR049C	MSO1		1.05559	0.085	0.96412	0.005	0.08895	0.085	0.00014
hrq1	hrq1	YDR525W-A	SNA2		1.07065	0.11	0.98453	0.016	0.089	0.11	0.0003
hrq1	hrq1	YOL080C	REX4		1.06635	0.044	0.98491	0.056	0.08914	0.044	2e-05
hrq1	hrq1	YOL036W	YOL036W		1.11097	0.086	1.02416	0.011	0.08914	0.086	0.00013
hrq1	hrq1	YJL158C	CIS3		1.0786	0.053	0.98406	0.01	0.08929	0.053	3e-05
hrq1	hrq1	YGR051C	YGR051C		1.14492	0.05	1.06814	0.051	0.08972	0.05	2e-05
hrq1	hrq1	YKR050W	TRK2		1.10851	0.136	1.01046	0.035	0.08979	0.136	0.0005
hrq1	hrq1	YOR043W	WHI2		1.08777	0.041	0.99702	0.001	0.08979	0.041	1e-05
hrq1	hrq1	YOL091W	SPO21		1.06396	0.015	0.97451	0.032	0.08981	0.015	0
hrq1	hrq1	YBR132C	AGP2		1.09216	0.015	1.02017	0.053	0.0901	0.015	6e-05	status=JK
hrq1	hrq1	YMR122C	YMR122C		1.09507	0.053	1.00445	0.005	0.09012	0.053	3e-05
hrq1	hrq1	YGL005C	COG7		1.09065	0.022	1.00102	0.013	0.09018	0.022	0.00014	status=JK
hrq1	hrq1	YLR188W	MDL1		1.03714	0.038	0.9425	0.014	0.0903	0.038	1e-05
hrq1	hrq1	YML118W	NGL3		1.07073	0.131	0.97721	0.01	0.09035	0.131	0.0005
hrq1	hrq1	YNL041C	COG6		1.05668	0.019	0.96682	0.037	0.09038	0.019	0
hrq1	hrq1	YBL051C	PIN4		1.00766	0.081	0.92211	0.031	0.09042	0.081	0.00014
hrq1	hrq1	YOR085W	OST3		0.92785	0.004	0.83919	0.032	0.09047	0.004	1e-05	status=JK
hrq1	hrq1	YOR131C	YOR131C		1.09341	0.073	0.99639	0.035	0.09068	0.073	8e-05
hrq1	hrq1	YJL036W	SNX4		1.06922	0.032	0.97969	0.035	0.09075	0.032	1e-05
hrq1	hrq1	YMR120C	ADE17		1.09852	0.012	1.01454	0.045	0.09083	0.012	4e-05	status=JK
hrq1	hrq1	YBR172C	SMY2		1.05985	0.002	0.96817	0.009	0.09096	0.002	0	status=JK
hrq1	hrq1	YCL062W	YCL062W		0.97223	0.013	0.88697	0.058	0.09099	0.013	6e-05	status=JK
hrq1	hrq1	YMR052C-A	YMR052C-A		1.07004	0.073	0.9791	0.024	0.09129	0.073	9e-05
hrq1	hrq1	YMR294W-A	YMR294W-A		0.78182	0.021	0.68975	0.05	0.09149	0.021	0.00025	status=JK
hrq1	hrq1	YMR009W	ADI1		1.11529	0.045	1.02854	0.043	0.09158	0.045	2e-05
hrq1	hrq1	YBL007C	SLA1		0.97697	0.024	0.90204	0.057	0.09168	0.024	0
hrq1	hrq1	YPR090W	YPR090W		1.11168	0.056	1.02592	0.03	0.09172	0.056	4e-05
hrq1	hrq1	YMR037C	MSN2		1.08136	0.299	0.9858	0.011	0.09174	0.298	0.00543
hrq1	hrq1	YML002W	YML002W		1.13316	0.176	1.0242	0.111	0.09181	0.175	0.001
hrq1	hrq1	YBR033W	EDS1		1.05498	0.009	0.96304	0.015	0.09189	0.009	0
hrq1	hrq1	YHL006C	SHU1		1.13649	0.097	1.04269	0.015	0.09205	0.097	0.00017
hrq1	hrq1	YKL213C	DOA1		0.96662	0.049	0.87554	0.018	0.09276	0.049	4e-05
hrq1	hrq1	YDR452W	PPN1		1.13517	0.092	1.02698	0.052	0.09337	0.092	0.00015
hrq1	hrq1	YCR086W	CSM1		0.983	0.1	0.88987	0.017	0.09339	0.1	0.00028
hrq1	hrq1	YOR125C	CAT5		1.04816	0.075	0.95093	0.015	0.09341	0.075	0.0001
hrq1	hrq1	YKR059W	TIF1		0.93541	0.079	0.83797	0.012	0.09358	0.079	0.00017
hrq1	hrq1	YER097W	YER097W		1.10196	0.069	1.01154	0.013	0.09358	0.069	7e-05
hrq1	hrq1	YNL034W	YNL034W		1.07794	0.08	0.98834	0.046	0.0936	0.08	0.00011
hrq1	hrq1	YIL027C	EMC5		1.08738	0.084	0.9973	0.015	0.09362	0.084	0.00013
hrq1	hrq1	YLR333C	RPS25B		1.09328	0.027	0.99586	0.035	0.09366	0.027	0.0002	status=JK
hrq1	hrq1	YJR038C	YJR038C		1.09795	0.032	1.00482	0.028	0.09367	0.032	0.00028	status=JK
hrq1	hrq1	YKL216W	URA1		0.48664	0.033	0.38919	0.008	0.09374	0.033	8e-05
hrq1	hrq1	YGR068C	ART5		1.07808	0.086	0.98329	0.011	0.09387	0.086	0.00014
hrq1	hrq1	YMR106C	YKU80		1.12508	0.091	1.01846	0.046	0.09392	0.091	0.00015
hrq1	hrq1	YNL064C	YDJ1		0.98003	0.034	0.8947	0.032	0.09406	0.034	1e-05
hrq1	hrq1	YKR093W	PTR2		1.07931	0.035	0.98334	0.04	0.09411	0.035	1e-05
hrq1	hrq1	YMR119W	ASI1		1.0946	0.067	0.99957	0.029	0.09466	0.067	6e-05
hrq1	hrq1	YDR046C	BAP3		1.10103	0.03	1.00361	0.013	0.09469	0.029	0.00024	status=JK
hrq1	hrq1	YGL032C	AGA2		1.1152	0.094	1.02155	0.014	0.09473	0.094	0.00017
hrq1	hrq1	YPR020W	ATP20		0.96565	0.024	0.87489	0.039	0.0948	0.024	0.0002	status=JK
hrq1	hrq1	YPR059C	YPR059C		1.07638	0.086	0.98233	0.012	0.09499	0.086	0.00014
hrq1	hrq1	YGR237C	YGR237C		0.54393	0.13	0.46433	0.07	0.09501	0.13	0.0036
hrq1	hrq1	YGR144W	THI4		1.11296	0.048	1.01427	0.026	0.09503	0.048	2e-05
hrq1	hrq1	YNL146W	YNL146W		1.13547	0.076	1.0429	0.034	0.09514	0.076	8e-05
hrq1	hrq1	YML006C	GIS4		1.01982	0.013	0.92043	0.016	0.09531	0.013	5e-05	status=JK
hrq1	hrq1	YMR312W	ELP6		0.9359	0.028	0.8221	0.061	0.09543	0.028	0.00029	status=JK
hrq1	hrq1	YBL089W	AVT5		1.05149	0.057	0.95946	0.009	0.0955	0.057	4e-05
hrq1	hrq1	YOL067C	RTG1		0.85472	0.026	0.76679	0.053	0.0959	0.026	1e-05
hrq1	hrq1	YDR092W	UBC13		1.103	0.082	1.00713	0.037	0.0961	0.082	0.00011
hrq1	hrq1	YNL122C	YNL122C		1.08946	0.042	0.99428	0.012	0.09638	0.042	2e-05
hrq1	hrq1	YDL119C	YDL119C		1.05362	0.026	0.95906	0.015	0.0966	0.026	0
hrq1	hrq1	YMR029C	FAR8		1.11001	0.034	1.0128	0.026	0.09674	0.034	1e-05
hrq1	hrq1	YJL210W	PEX2		1.00613	0.073	0.9091	0.007	0.09679	0.073	0.00011
hrq1	hrq1	YPR060C	ARO7		1.07163	0.089	0.96651	0.04	0.09695	0.089	0.00016
hrq1	hrq1	YIL010W	DOT5		1.08075	0.032	0.98766	0.029	0.097	0.032	1e-05
hrq1	hrq1	YIL058W	YIL058W		1.0595	0.004	0.95345	0.065	0.09726	0.004	1e-05	status=JK
hrq1	hrq1	YDL130W	RPP1B		1.03377	0.033	0.93903	0.027	0.09736	0.033	1e-05
hrq1	hrq1	YGL039W	YGL039W		1.11031	0.139	1.02299	0.023	0.09811	0.139	0.00053
hrq1	hrq1	YOR030W	DFG16		0.79584	0.14	0.68809	0.078	0.09812	0.14	0.00147
hrq1	hrq1	YCR034W	FEN1		1.10337	0.02	1.00104	0.007	0.09812	0.02	0
hrq1	hrq1	YNL142W	MEP2		1.09146	0.053	0.99447	0.005	0.09827	0.053	3e-05
hrq1	hrq1	YBR291C	CTP1		1.09639	0.035	0.9889	0.048	0.09842	0.035	0.00034	status=JK
hrq1	hrq1	YBR164C	ARL1		1.03639	0.039	0.93936	0.006	0.09862	0.039	1e-05
hrq1	hrq1	YGR014W	MSB2		0.99096	0.045	0.89539	0.02	0.09862	0.045	3e-05
hrq1	hrq1	YNL032W	SIW14		1.05356	0.038	0.96389	0.044	0.09868	0.038	0.00043	status=JK
hrq1	hrq1	YMR105C	PGM2		1.09252	0.04	0.99686	0.015	0.0988	0.04	1e-05
hrq1	hrq1	YKL109W	HAP4		1.05826	0.029	0.96284	0.007	0.09966	0.029	1e-05
hrq1	hrq1	YPR069C	SPE3		0.90323	0.011	0.8012	0.024	0.09994	0.011	5e-05	status=JK
hrq1	hrq1	YMR010W	YMR010W		1.11824	0.004	1.02347	0.017	0.10027	0.004	0	status=JK
hrq1	hrq1	YNL145W	MFA2		1.14798	0.069	1.03326	0.076	0.10058	0.069	6e-05
hrq1	hrq1	YLR361C	DCR2		1.07803	0.038	0.9697	0.05	0.10096	0.037	0.0004	status=JK
hrq1	hrq1	YCR068W	ATG15		1.04729	0.09	0.95413	0.041	0.10125	0.09	0.00017
hrq1	hrq1	YDL002C	NHP10		0.86688	0.034	0.76699	0.027	0.1015	0.034	2e-05
hrq1	hrq1	YML121W	GTR1		0.98672	0.059	0.8867	0.048	0.10165	0.059	6e-05
hrq1	hrq1	YML063W	RPS1B		0.75229	0.057	0.65322	0.033	0.10189	0.056	0.00012
hrq1	hrq1	YPR179C	HDA3		0.96836	0.037	0.86583	0.027	0.10213	0.037	2e-05
hrq1	hrq1	YNL030W	HHF2		1.08491	0.083	0.98416	0.03	0.10273	0.082	0.00012
hrq1	hrq1	YFR034C	PHO4		1.08435	0.044	0.98301	0.007	0.10279	0.044	2e-05
hrq1	hrq1	YGR233C	PHO81		1.13011	0.05	1.02174	0.033	0.10296	0.05	2e-05
hrq1	hrq1	YGL058W	RAD6		1.08051	0.067	0.97162	0.052	0.10298	0.067	0.00129	status=JK
hrq1	hrq1	YCR073C	SSK22		1.13496	0.048	1.02813	0.011	0.10302	0.048	2e-05
hrq1	hrq1	YGR122C-A	YGR122C-A		1.13149	0.042	1.02585	0.009	0.10305	0.042	0.00045	status=JK
hrq1	hrq1	YLR388W	RPS29A		0.92102	0.043	0.81781	0.011	0.10325	0.043	3e-05
hrq1	hrq1	YNL156C	NSG2		1.09212	0.011	0.98531	0.039	0.10359	0.011	3e-05	status=JK
hrq1	hrq1	YBR022W	POA1		1.08937	0.006	0.98669	0.031	0.10362	0.006	1e-05	status=JK
hrq1	hrq1	YBR221C	PDB1		1.08882	0.006	0.99317	0.038	0.10363	0.006	1e-05	status=JK
hrq1	hrq1	YML128C	MSC1		1.0498	0.018	0.95202	0.039	0.10384	0.018	0.0001	status=JK
hrq1	hrq1	YMR223W	UBP8		1.06388	0.022	0.95982	0.037	0.10391	0.022	0
hrq1	hrq1	YHR022C	YHR022C		1.06437	0.015	0.96766	0.036	0.10438	0.015	6e-05	status=JK
hrq1	hrq1	YIL090W	ICE2		0.49855	0.192	0.40572	0.043	0.10467	0.192	0.04599	status=JK
hrq1	hrq1	YML056C	IMD4		1.0895	0.03	0.98978	0.012	0.10476	0.03	0.00026	status=JK
hrq1	hrq1	YOL052C	SPE2		0.85753	0.028	0.75348	0.004	0.10509	0.028	1e-05
hrq1	hrq1	YNL068C	FKH2		1.12129	0.038	1.01681	0.008	0.10531	0.038	1e-05
hrq1	hrq1	YLR192C	HCR1		0.78733	0.088	0.68136	0.01	0.10589	0.088	0.00038
hrq1	hrq1	YBR134W	YBR134W		1.15289	0.046	1.04628	0.026	0.10657	0.046	2e-05
hrq1	hrq1	YMR119W-A	YMR119W-A		1.12641	0.002	1.02317	0.014	0.10663	0.002	0	status=JK
hrq1	hrq1	YLR193C	UPS1		0.86262	0.048	0.76006	0.017	0.10664	0.048	5e-05
hrq1	hrq1	YPL152W	RRD2		1.07464	0.037	0.9622	0.019	0.10675	0.037	0.0004	status=JK
hrq1	hrq1	YCL025C	AGP1		0.98493	0.094	0.87698	0.057	0.10686	0.094	0.00024
hrq1	hrq1	YPR153W	YPR153W		1.10618	0.056	1	0.014	0.10738	0.056	4e-05
hrq1	hrq1	YGL244W	RTF1		0.87638	0.049	0.77374	0.015	0.10743	0.049	5e-05
hrq1	hrq1	YBR059C	AKL1		1.02765	0.02	0.92145	0.003	0.1075	0.02	0.00013	status=JK
hrq1	hrq1	YOR215C	AIM41		1.08802	0.019	0.98985	0.064	0.10884	0.019	0
hrq1	hrq1	YOL095C	HMI1		0.96116	0.034	0.85861	0.043	0.109	0.034	1e-05
hrq1	hrq1	YPL269W	KAR9		1.14177	0.009	1.03384	0.011	0.10922	0.009	2e-05	status=JK
hrq1	hrq1	YGR031W	IMO32		1.10888	0.036	1.00121	0.025	0.10938	0.036	0.00035	status=JK
hrq1	hrq1	YDL214C	PRR2		1.08931	0.066	0.98168	0.061	0.10944	0.066	6e-05
hrq1	hrq1	YNL066W	SUN4		1.20056	0.113	1.0931	0.045	0.10957	0.113	0.00023
hrq1	hrq1	YDL124W	YDL124W		1.12829	0.034	1.02928	0.046	0.10978	0.034	0.0003	status=JK
hrq1	hrq1	YPL239W	YAR1		0.73535	0.015	0.61912	0.043	0.11029	0.015	0.00014	status=JK
hrq1	hrq1	YDL213C	NOP6		0.95485	0.023	0.85476	0.038	0.11034	0.023	0
hrq1	hrq1	YOR334W	MRS2		1.10042	0.078	0.99036	0.012	0.11087	0.078	0.0001
hrq1	hrq1	YHL027W	RIM101		1.04529	0.003	0.92886	0.028	0.11097	0.003	0	status=JK
hrq1	hrq1	YGL174W	BUD13		0.91465	0.015	0.80691	0.029	0.11153	0.015	9e-05	status=JK
hrq1	hrq1	YGL168W	HUR1		0.75748	0.042	0.64332	0.04	0.11183	0.042	5e-05
hrq1	hrq1	YHR093W	YHR093W		1.13514	0.044	1.02566	0.013	0.11269	0.044	0.0005	status=JK
hrq1	hrq1	YHR180W	YHR180W		0.78861	0.079	0.66129	0.081	0.11302	0.079	0.00027
hrq1	hrq1	YNL051W	COG5		1.07885	0.071	0.96826	0.019	0.11311	0.071	8e-05
hrq1	hrq1	YML030W	RCF1		1.0776	0.09	0.96947	0.043	0.11314	0.09	0.00016
hrq1	hrq1	YGR275W	RTT102		1.10558	0.039	1.0055	0.052	0.11315	0.039	0.00041	status=JK
hrq1	hrq1	YBL094C	YBL094C		1.00865	0.128	0.90693	0.089	0.11354	0.128	0.00056
hrq1	hrq1	YDL215C	GDH2		1.01217	0.089	0.89961	0.003	0.11358	0.089	0.00019
hrq1	hrq1	YER187W	YER187W		1.1849	0.078	1.07088	0.03	0.11378	0.078	8e-05
hrq1	hrq1	YGL149W	YGL149W		1.01993	0.115	0.90546	0.031	0.11445	0.115	0.00039
hrq1	hrq1	YNL157W	IGO1		1.15644	0.051	1.04157	0.051	0.11464	0.051	2e-05
hrq1	hrq1	YER083C	GET2		1.02059	0.042	0.91045	0.03	0.11468	0.042	2e-05
hrq1	hrq1	YMR012W	CLU1		1.13003	0.032	1.00959	0.026	0.11501	0.032	1e-05
hrq1	hrq1	YDR512C	EMI1		1.00657	0.001	0.89308	0.022	0.11524	0.001	0	status=JK
hrq1	hrq1	YPR050C	YPR050C		1.03606	0.116	0.91199	0.048	0.11596	0.116	0.00414	status=JK
hrq1	hrq1	YBR071W	YBR071W		1.11349	0.079	0.99046	0.029	0.11661	0.079	0.0001
hrq1	hrq1	YMR088C	VBA1		0.38095	0.164	0.27953	0.242	0.11701	0.163	0.01867
hrq1	hrq1	YMR104C	YPK2		1.16879	0.018	1.04476	0.023	0.11712	0.018	8e-05	status=JK
hrq1	hrq1	YNL031C	HHT2		1.10703	0.026	0.9895	0.037	0.11724	0.026	0
hrq1	hrq1	YMR299C	DYN3		1.08789	0.066	0.97725	0.043	0.11839	0.066	6e-05
hrq1	hrq1	YMR278W	PGM3		1.18727	0.117	1.06311	0.059	0.11856	0.117	0.00026
hrq1	hrq1	YMR030W	RSF1		1.14139	0.054	1.02419	0.05	0.11883	0.054	3e-05
hrq1	hrq1	YBR126C	TPS1		0.82725	0.08	0.72409	0.053	0.11887	0.08	0.00025
hrq1	hrq1	YDL104C	QRI7		1.09232	0.055	0.97459	0.006	0.11901	0.055	4e-05
hrq1	hrq1	YMR055C	BUB2		1.14504	0.217	1.01029	0.066	0.11959	0.217	0.00182
hrq1	hrq1	YNL045W	LAP2		1.14398	0.05	1.03632	0.047	0.11965	0.05	2e-05
hrq1	hrq1	YPR042C	PUF2		1.11192	0.099	0.9971	0.035	0.11984	0.099	0.00019
hrq1	hrq1	YMR040W	YET2		1.10205	0.113	0.97898	0.008	0.1202	0.113	0.00029
hrq1	hrq1	YDL187C	YDL187C		1.10924	0.017	1.00088	0.053	0.12025	0.017	8e-05	status=JK
hrq1	hrq1	YML094W	GIM5		1.18322	0.009	1.06348	0.034	0.12041	0.009	2e-05	status=JK
hrq1	hrq1	YFL001W	DEG1		1.01023	0.075	0.88779	0.004	0.12044	0.075	0.00011
hrq1	hrq1	YNR006W	VPS27		0.80775	0.154	0.69559	0.05	0.12051	0.154	0.00185
hrq1	hrq1	YLR065C	ENV10		0.85257	0.067	0.73628	0.027	0.12222	0.067	0.00014
hrq1	hrq1	YDR072C	IPT1		1.08851	0.12	0.9687	0.062	0.12236	0.12	0.00037
hrq1	hrq1	YOR275C	RIM20		1.02644	0.013	0.90236	0.031	0.12274	0.013	5e-05	status=JK
hrq1	hrq1	YLR453C	RIF2		1.15288	0.095	1.03381	0.045	0.12302	0.095	0.00015
hrq1	hrq1	YMR291W	TDA1		1.11105	0.065	0.99107	0.076	0.1233	0.065	0.00114	status=JK
hrq1	hrq1	YDR402C	DIT2		1.16288	0.031	1.03839	0.032	0.12368	0.031	0.00024	status=JK
hrq1	hrq1	YFR009W	GCN20		1.04041	0.047	0.9211	0.02	0.12385	0.046	2e-05
hrq1	hrq1	YNL079C	TPM1		1.02464	0.029	0.90057	0.031	0.12425	0.029	1e-05
hrq1	hrq1	YGR133W	PEX4		1.10078	0.087	0.97658	0.03	0.12436	0.087	0.00014
hrq1	hrq1	YLR200W	YKE2		1.10163	0.061	0.9849	0.064	0.12485	0.061	5e-05
hrq1	hrq1	YMR080C	NAM7		1.15867	0.159	1.03188	0.054	0.12504	0.159	0.0007
hrq1	hrq1	YGL115W	SNF4		1.10269	0.083	0.97865	0.021	0.12528	0.083	0.00012
hrq1	hrq1	YML052W	SUR7		1.09111	0.163	0.96658	0.028	0.12532	0.163	0.0009
hrq1	hrq1	YMR115W	MGR3		1.08262	0.13	0.95269	0.018	0.12534	0.13	0.00047
hrq1	hrq1	YPR066W	UBA3		0.83842	0.097	0.71778	0.023	0.12536	0.097	0.00042
hrq1	hrq1	YGL024W	YGL024W		0.5409	0.075	0.4151	0.026	0.1255	0.075	0.00072
hrq1	hrq1	YFR048W	RMD8		0.95459	0.1	0.83348	0.02	0.12631	0.1	0.00032
hrq1	hrq1	YNL135C	FPR1		1.03261	0.121	0.90302	0.041	0.12634	0.121	0.00044
hrq1	hrq1	YLR377C	FBP1		1.09586	0.083	0.96977	0.03	0.12679	0.083	0.00012
hrq1	hrq1	YLR372W	SUR4		1.09404	0.024	0.96755	0.043	0.12725	0.024	0
hrq1	hrq1	YJL138C	TIF2		0.92921	0.051	0.80224	0.003	0.12751	0.051	5e-05
hrq1	hrq1	YHR030C	SLT2		1.03841	0.037	0.91082	0.007	0.12834	0.037	1e-05
hrq1	hrq1	YKL204W	EAP1		0.28349	0.141	0.18671	0.119	0.12866	0.141	0.02758
hrq1	hrq1	YNL153C	GIM3		0.81383	0.038	0.69964	0.137	0.12895	0.038	0.00073	status=JK
hrq1	hrq1	YLR081W	GAL2		1.14935	0.022	1.00739	0.048	0.12938	0.022	0.00012	status=JK
hrq1	hrq1	YGL160W	AIM14		0.79759	0.127	0.67397	0.026	0.12946	0.127	0.00108
hrq1	hrq1	YML038C	YMD8		0.88962	0.022	0.76128	0.009	0.12987	0.022	0
hrq1	hrq1	YBR122C	MRPL36		1.15241	0.018	1.01527	0.014	0.13047	0.018	0
hrq1	hrq1	YDL240W	LRG1		0.99408	0.043	0.85989	0.027	0.13051	0.043	2e-05
hrq1	hrq1	YML081C-A	ATP18		1.03337	0.094	0.88245	0.066	0.13079	0.094	0.00021
hrq1	hrq1	YER092W	IES5		0.87966	0.041	0.73183	0.093	0.13099	0.041	0.00073	status=JK
hrq1	hrq1	YLR370C	ARC18		1.08176	0.028	0.95096	0.043	0.13108	0.028	0
hrq1	hrq1	YLR224W	YLR224W		1.13539	0.014	1.00339	0.004	0.13335	0.014	5e-05	status=JK
hrq1	hrq1	YJL206C-A	YJL206C-A		0.77137	0.048	0.63941	0.052	0.13339	0.048	7e-05
hrq1	hrq1	YOR065W	CYT1		1.00433	0.014	0.87514	0.019	0.13427	0.014	7e-05	status=JK
hrq1	hrq1	YLL029W	FRA1		1.09323	0.157	0.97016	0.07	0.13604	0.156	0.00079
hrq1	hrq1	YNL056W	OCA2		1.12917	0.113	0.98478	0.015	0.13644	0.113	0.00027
hrq1	hrq1	YJL117W	PHO86		1.04068	0.017	0.90855	0.045	0.13645	0.017	9e-05	status=JK
hrq1	hrq1	YMR110C	HFD1		1.20575	0.029	1.0684	0.005	0.13667	0.029	0
hrq1	hrq1	YDR024W	YDR024W		1.04344	0.084	0.90694	0.011	0.13727	0.084	0.00014
hrq1	hrq1	YJR087W	YJR087W		1.00401	0.021	0.86094	0.052	0.13809	0.021	0.00015	status=JK
hrq1	hrq1	YNL004W	HRB1		1.18286	0.048	1.03982	0.009	0.13996	0.048	2e-05
hrq1	hrq1	YMR243C	ZRC1		0.92178	0.063	0.77666	0.022	0.14099	0.063	9e-05
hrq1	hrq1	YGL031C	RPL24A		0.95248	0.134	0.80269	0.026	0.14252	0.134	0.00075
hrq1	hrq1	YGL167C	PMR1		0.88655	0.013	0.73758	0.032	0.14292	0.013	0
hrq1	hrq1	YBR084C-A	RPL19A		1.03494	0.042	0.89593	0.006	0.1432	0.042	2e-05
hrq1	hrq1	YPL144W	POC4		0.95918	0.089	0.80271	0.092	0.14371	0.088	0.00022
hrq1	hrq1	YMR233W	TRI1		1.16934	0.021	1.02572	0.01	0.14371	0.021	0.00011	status=JK
hrq1	hrq1	YIR023W	DAL81		0.97546	0.013	0.83867	0.014	0.14391	0.013	6e-05	status=JK
hrq1	hrq1	YOR035C	SHE4		1.07369	0.062	0.91314	0.086	0.14437	0.062	0.00112	status=JK
hrq1	hrq1	YDL211C	YDL211C		1.02831	0.051	0.88465	0.007	0.14539	0.051	3e-05
hrq1	hrq1	YDL242W	YDL242W		1.14329	0.075	1.00032	0.008	0.14622	0.074	8e-05
hrq1	hrq1	YOL032W	OPI10		1.06497	0.022	0.9245	0.014	0.14641	0.022	0
hrq1	hrq1	YBR016W	YBR016W		0.66362	0.036	0.52521	0.044	0.14661	0.036	5e-05
hrq1	hrq1	YLR337C	VRP1		0.90893	0.127	0.76214	0.007	0.14721	0.127	0.00074
hrq1	hrq1	YNR020C	ATP23		0.96775	0.007	0.82037	0.035	0.14748	0.007	2e-05	status=JK
hrq1	hrq1	YOR136W	IDH2		0.91225	0.005	0.75991	0.022	0.14801	0.005	1e-05	status=JK
hrq1	hrq1	YER095W	RAD51		1.0481	0.099	0.90076	0.019	0.14945	0.099	0.00023
hrq1	hrq1	YMR114C	YMR114C		1.18184	0.068	1.02886	0.009	0.15121	0.068	5e-05
hrq1	hrq1	YLR338W	YLR338W		0.95848	0.032	0.80232	0.043	0.1529	0.032	1e-05
hrq1	hrq1	YMR052W	FAR3		1.1988	0.075	1.04297	0.041	0.15542	0.075	7e-05
hrq1	hrq1	YBR165W	UBS1		0.80319	0.025	0.64048	0.066	0.15598	0.025	0.00033	status=JK
hrq1	hrq1	YBR200W	BEM1		0.79065	0.132	0.61468	0.138	0.15609	0.132	0.00918	status=JK
hrq1	hrq1	YML124C	TUB3		1.16738	0.05	1.01846	0.025	0.1566	0.05	2e-05
hrq1	hrq1	YGL087C	MMS2		1.19985	0.073	1.04162	0.026	0.15722	0.073	6e-05
hrq1	hrq1	YDL236W	PHO13		0.95542	0.091	0.79922	0.018	0.15729	0.091	0.00024
hrq1	hrq1	YMR124W	YMR124W		1.20647	0.066	1.04206	0.029	0.1576	0.066	5e-05
hrq1	hrq1	YFR047C	BNA6		0.86056	0.043	0.69925	0.051	0.15876	0.043	0.00084	status=JK
hrq1	hrq1	YNL081C	SWS2		0.93144	0.045	0.76554	0.017	0.15902	0.045	3e-05
hrq1	hrq1	YNR041C	COQ2		1.09341	0.075	0.93042	0.068	0.15958	0.075	9e-05
hrq1	hrq1	YMR086C-A	YMR086C-A		1.21346	0.107	1.03598	0.08	0.16119	0.107	0.00019
hrq1	hrq1	YMR101C	SRT1		1.1907	0.076	1.0353	0.021	0.1613	0.076	7e-05
hrq1	hrq1	YOL008W	COQ10		1.07074	0.009	0.91024	0.008	0.1622	0.009	2e-05	status=JK
hrq1	hrq1	YHL020C	OPI1		0.90779	0.036	0.74619	0.014	0.16398	0.036	2e-05
hrq1	hrq1	YLR235C	YLR235C		0.95838	0.116	0.79289	0.021	0.16409	0.116	0.00048
hrq1	hrq1	YMR057C	YMR057C		1.18963	0.075	1.02589	0.003	0.16424	0.075	7e-05
hrq1	hrq1	YGR101W	PCP1		0.93951	0.023	0.77184	0.016	0.16451	0.023	0
hrq1	hrq1	YLR038C	COX12		1.05699	0.025	0.89456	0.037	0.16789	0.025	0.00019	status=JK
hrq1	hrq1	YCL006C	YCL006C		1.11703	0.036	0.951	0.01	0.16802	0.036	0.00034	status=JK
hrq1	hrq1	YDL100C	GET3		1.10296	0.032	0.92494	0.032	0.16887	0.032	0.00027	status=JK
hrq1	hrq1	YCR031C	RPS14A		1.00349	0.026	0.83979	0.027	0.16915	0.026	0.00022	status=JK
hrq1	hrq1	YDL219W	DTD1		0.99767	0.004	0.82939	0.014	0.1693	0.004	1e-05	status=JK
hrq1	hrq1	YMR015C	ERG5		1.12052	0.023	0.94632	0.013	0.16993	0.023	0.00014	status=JK
hrq1	hrq1	YOR333C	YOR333C		1.06722	0.095	0.90192	0.021	0.1704	0.095	0.00019
hrq1	hrq1	YMR078C	CTF18		0.95019	0.021	0.78374	0.032	0.17056	0.021	0.00016	status=JK
hrq1	hrq1	YMR018W	YMR018W		1.18843	0.047	1.01534	0.028	0.17118	0.047	2e-05
hrq1	hrq1	YJR077C	MIR1		0.33479	0.042	0.15704	0.016	0.17165	0.042	0.00532	status=JK
hrq1	hrq1	YHR008C	SOD2		0.71456	0.036	0.58192	0.189	0.17329	0.036	4e-05
hrq1	hrq1	YDR161W	YDR161W		0.78579	0.019	0.61661	0.037	0.1752	0.019	0.00019	status=JK
hrq1	hrq1	YMR230W	RPS10B		1.00417	0.069	0.8278	0.006	0.17804	0.069	9e-05
hrq1	hrq1	YLR023C	IZH3		1.1822	0.028	1.00022	0.007	0.17993	0.028	0.00019	status=JK
hrq1	hrq1	YNL141W	AAH1		0.83872	0.017	0.65577	0.007	0.18015	0.017	0.00013	status=JK
hrq1	hrq1	YMR058W	FET3		1.2203	0.027	1.03942	0.001	0.18122	0.027	0.00016	status=JK
hrq1	hrq1	YMR044W	IOC4		1.25777	0.01	1.07268	0.012	0.18289	0.01	2e-05	status=JK
hrq1	hrq1	YKR042W	UTH1		0.90732	0.172	0.70744	0.077	0.18539	0.172	0.00183
hrq1	hrq1	YLR190W	MMR1		0.99379	0.052	0.8069	0.011	0.18674	0.052	4e-05
hrq1	hrq1	YGL059W	PKP2		1.0125	0.104	0.80564	0.151	0.18676	0.104	0.0003
hrq1	hrq1	YIL134W	FLX1		0.98568	0.01	0.80068	0.009	0.18679	0.01	4e-05	status=JK
hrq1	hrq1	YMR304C-A	YMR304C-A		1.15411	0.018	0.96407	0.011	0.18682	0.018	8e-05	status=JK
hrq1	hrq1	YMR067C	UBX4		1.1527	0.023	0.9737	0.058	0.18689	0.023	0.00014	status=JK
hrq1	hrq1	YBR224W	YBR224W		1.12748	0.013	0.93774	0.05	0.18713	0.013	4e-05	status=JK
hrq1	hrq1	YLR376C	PSY3		1.17556	0.072	0.98937	0.012	0.18761	0.072	6e-05
hrq1	hrq1	YDL238C	GUD1		1.14916	0.053	0.95815	0.018	0.188	0.053	3e-05
hrq1	hrq1	YDL199C	YDL199C		1.10038	0.111	0.90976	0.017	0.18806	0.111	0.00028
hrq1	hrq1	YMR234W	RNH1		1.22798	0.055	1.03835	0.04	0.19182	0.054	2e-05
hrq1	hrq1	YJR118C	ILM1		0.78341	0.084	0.59751	0.012	0.19222	0.084	0.00033
hrq1	hrq1	YMR008C	PLB1		1.23051	0.084	1.0354	0.004	0.19377	0.084	9e-05
hrq1	hrq1	YMR065W	KAR5		0.97363	0.055	0.7873	0.055	0.1941	0.055	5e-05
hrq1	hrq1	YMR107W	SPG4		1.21845	0.056	1.02161	0.03	0.19682	0.056	3e-05
hrq1	hrq1	YGR077C	PEX8		1.08565	0.093	0.89687	0.035	0.19742	0.093	0.00017
hrq1	hrq1	YJR003C	YJR003C		0.97178	0.339	0.74464	0.268	0.19767	0.338	0.0105
hrq1	hrq1	YIL157C	COA1		1.16149	0.044	0.95318	0.048	0.20002	0.044	1e-05
hrq1	hrq1	YMR103C	YMR103C		1.19908	0.131	1.00149	0.015	0.20118	0.131	0.00036
hrq1	hrq1	YOR293W	RPS10A		0.93478	0.043	0.72711	0.024	0.20242	0.043	3e-05
hrq1	hrq1	YDL218W	YDL218W		0.97036	0.019	0.74797	0.062	0.20715	0.019	0.00012	status=JK
hrq1	hrq1	YMR021C	MAC1		1.06015	0.006	0.86301	0.051	0.20771	0.006	1e-05	status=JK
hrq1	hrq1	YMR099C	YMR099C		1.20862	0.109	0.99786	0.009	0.20842	0.109	0.0002
hrq1	hrq1	YKL056C	TMA19		0.96549	0.114	0.77552	0.039	0.20976	0.113	0.00044
hrq1	hrq1	YHL007C	STE20		0.43938	0.241	0.20716	0.045	0.21173	0.241	0.03559
hrq1	hrq1	YMR109W	MYO5		1.23937	0.039	1.02804	0.019	0.21483	0.039	1e-05
hrq1	hrq1	YML022W	APT1		0.8665	0.236	0.66281	0.138	0.21626	0.236	0.00522
hrq1	hrq1	YMR238W	DFG5		1.2057	0.069	0.98952	0.054	0.21684	0.069	5e-05
hrq1	hrq1	YMR035W	IMP2		1.12204	0.043	0.90309	0.017	0.21722	0.043	2e-05
hrq1	hrq1	YDL234C	GYP7		1.03429	0.15	0.75529	0.191	0.21743	0.15	0.00083
hrq1	hrq1	YMR095C	SNO1		1.24187	0.074	1.02943	0.041	0.22197	0.074	6e-05
hrq1	hrq1	YML029W	USA1		1.23717	0.063	1.01488	0.033	0.22253	0.063	0.00087	status=JK
hrq1	hrq1	YMR068W	AVO2		1.2591	0.127	1.034	0.017	0.22774	0.127	0.00028
hrq1	hrq1	YMR075W	RCO1		1.21805	0.018	0.98964	0.007	0.22994	0.018	7e-05	status=JK
hrq1	hrq1	YKR097W	PCK1		1.21484	0.14	1.00307	0.037	0.23104	0.14	0.00042
hrq1	hrq1	YMR100W	MUB1		1.08158	0.059	0.85156	0.029	0.23171	0.059	4e-05
hrq1	hrq1	YDL222C	FMP45		0.98087	0.005	0.74745	0.008	0.23338	0.005	1e-05	status=JK
hrq1	hrq1	YDR008C	YDR008C		1.06278	0.028	0.8302	0.024	0.23502	0.028	1e-05
hrq1	hrq1	YDL241W	YDL241W		1.06444	0.068	0.82021	0.049	0.23857	0.067	7e-05
hrq1	hrq1	YDL224C	WHI4		0.97752	0.015	0.73633	0.056	0.24058	0.015	8e-05	status=JK
hrq1	hrq1	YMR085W	YMR085W		1.29926	0.063	1.04671	0.039	0.24338	0.063	3e-05
hrq1	hrq1	YDL216C	RRI1		1.02233	0.039	0.77502	0.038	0.25021	0.039	2e-05
hrq1	hrq1	YNL037C	IDH1		1.08919	0.06	0.83494	0.005	0.25209	0.06	0.001	status=JK
hrq1	hrq1	YNR004W	SWM2		1.16476	0.184	0.91656	0.096	0.25445	0.184	0.00825	status=JK
hrq1	hrq1	YMR075C-A	YMR075C-A		1.23631	0.028	0.97014	0.031	0.26404	0.028	0
hrq1	hrq1	YMR073C	IRC21		1.21581	0.187	0.95752	0.049	0.26599	0.187	0.00098
hrq1	hrq1	YNL080C	EOS1		0.81427	0.058	0.54841	0.029	0.26834	0.058	0.0001
hrq1	hrq1	YIL132C	CSM2		1.25627	0.025	0.98973	0.006	0.26887	0.025	0.00014	status=JK
hrq1	hrq1	YKR040C	YKR040C		1.20095	0.039	0.93344	0.066	0.26892	0.039	0.00035	status=JK
hrq1	hrq1	YLR180W	SAM1		1.03582	0.034	0.78337	0.046	0.26981	0.034	0.00036	status=JK
hrq1	hrq1	YMR096W	SNZ1		1.2229	0.025	0.95388	0.009	0.27055	0.025	0
hrq1	hrq1	YMR063W	RIM9		1.13359	0.021	0.86099	0.033	0.27602	0.02	0.00011	status=JK
hrq1	hrq1	YFL036W	RPO41		0.49571	0.208	0.20411	0.01	0.29494	0.208	0.01747
hrq1	hrq1	YDL223C	HBT1		1.05124	0.047	0.73189	0.081	0.29851	0.047	2e-05
hrq1	hrq1	YOR312C	RPL20B		1.08625	0.025	0.79191	0.019	0.30044	0.025	0
hrq1	hrq1	YMR102C	YMR102C		1.33199	0.098	1.02493	0.027	0.30853	0.098	0.00011
hrq1	hrq1	YMR086W	SEG1		1.36075	0.087	1.04043	0.025	0.3148	0.087	7e-05
hrq1	hrq1	YDL233W	MFG1		1.03269	0.072	0.69425	0.029	0.32311	0.072	9e-05
hrq1	hrq1	YMR092C	AIP1		1.30558	0.031	0.98184	0.042	0.32973	0.03	0
hrq1	hrq1	YBL021C	HAP3		0.83332	0.398	0.5396	0.375	0.33652	0.398	0.02485
hrq1	hrq1	YMR054W	STV1		1.31318	0.119	0.98444	0.047	0.33989	0.119	0.0002
hrq1	hrq1	YDL232W	OST4		0.55126	0.041	0.2021	0.055	0.34142	0.041	0.00183	status=JK
hrq1	hrq1	YCR063W	BUD31		0.96567	0.017	0.61544	0.021	0.35097	0.017	0
hrq1	hrq1	YJR054W	KCH1		0.65602	0.364	0.26072	0.083	0.37032	0.364	0.03662
hrq1	hrq1	YDL231C	BRE4		1.02648	0.011	0.62913	0.043	0.39063	0.011	0
hrq1	hrq1	YMR087W	YMR087W		1.37585	0.041	0.98209	0.037	0.40123	0.041	0.0003	status=JK
hrq1	hrq1	YDL230W	PTP1		1.03062	0.025	0.64156	0.063	0.40438	0.025	0.00019	status=JK
hrq1	hrq1	YDL226C	GCS1		1.04438	0.075	0.62076	0.049	0.43229	0.075	0.0001
hrq1	hrq1	YPR074C	TKL1		0.93146	0.079	0.49238	0.569	0.44451	0.079	0.0024	status=JK
hrq1	hrq1	YJR120W	YJR120W		1.117	0.147	0.64429	0.03	0.48644	0.147	0.00062
hrq1	hrq1	YDL229W	SSB1		0.92069	0.056	0.38697	0.044	0.53688	0.056	6e-05
hrq1	hrq1	YFL010C	WWM1		0.67224	0.01	0.10044	0.085	0.5714	0.01	7e-05	status=JK

## Sheet: Table S8
Query ORF	Query Name	Array ORF	Array Name	Array annotation	Normalized colony size (EXPERIMENT)	Normalized colony std. dev. (EXPERIMENT)	Normalized colony size (CONTROL)	Normalized colony std. dev. (CONTROL)	Score	Score stdev	p-Value	Additional information
hrq1	hrq1	YDR386W	MUS81		0.3849	0.048	1.01758	0.05	-0.63686	0.048	0.00053
hrq1	hrq1	YJL092W	SRS2		0.30998	0.059	0.94058	0.026	-0.63643	0.059	0.00187
hrq1	hrq1	YHR134W	WSS1		0.3277	0.031	0.92159	0.045	-0.59019	0.031	0.00023
hrq1	hrq1	YLR135W	SLX4		0.45004	0.009	0.97858	0.03	-0.52684	0.009	0
hrq1	hrq1	YHR154W	RTT107		0.44864	0.011	0.96229	0.054	-0.51965	0.011	0.00019	status=JK
hrq1	hrq1	YBR228W	SLX1		0.52217	0.062	1.04613	0.021	-0.51889	0.062	0.00046
hrq1	hrq1	YML042W	CAT2		0.36529	0.185	0.83246	0.229	-0.50115	0.185	0.02911
hrq1	hrq1	YGR097W	ASK10		0.21478	0.054	0.71242	0.026	-0.49125	0.054	0.02037	status=JK
hrq1	hrq1	YMR194C-A	YMR194C-A		0.52437	0.056	1.01951	0.028	-0.48981	0.056	0.00033
hrq1	hrq1	YBR094W	PBY1		0.51708	0.051	1.00775	0.006	-0.48782	0.051	0.00026
hrq1	hrq1	YMR259C	TRM732		0.52158	0.066	1.0033	0.011	-0.47534	0.066	0.00055
hrq1	hrq1	YHR031C	RRM3		0.5198	0.045	0.99428	0.035	-0.47413	0.045	0.00017
hrq1	hrq1	YMR280C	CAT8		0.47049	0.058	0.92843	0.007	-0.46066	0.058	0.0005
hrq1	hrq1	YBR099C	YBR099C		0.55009	0.074	1.00608	0.026	-0.45695	0.074	0.00065
hrq1	hrq1	YBR098W	MMS4		0.54229	0.053	0.98788	0.073	-0.44911	0.053	0.00025
hrq1	hrq1	YBR100W	YBR100W		0.49059	0.042	0.91943	0.006	-0.42714	0.042	0.00017
hrq1	hrq1	YMR190C	SGS1		0.52772	0.033	0.93548	0.04	-0.41601	0.033	0.00133	status=JK
hrq1	hrq1	YMR283C	RIT1		0.67171	0.065	1.08757	0.004	-0.41263	0.065	0.00025
hrq1	hrq1	YMR275C	BUL1		0.61164	0.064	1.01167	0.034	-0.39867	0.064	0.00031
hrq1	hrq1	YMR195W	ICY1		0.63997	0.146	1.02381	0.02	-0.38854	0.146	0.00311
hrq1	hrq1	YKL113C	RAD27		0.48275	0.001	0.86131	0.002	-0.3799	0.001	0	status=JK
hrq1	hrq1	YMR192W	GYL1		0.65441	0.034	1.02752	0.044	-0.36709	0.034	4e-05
hrq1	hrq1	YER111C	SWI4		0.57998	0.058	0.94159	0.009	-0.36229	0.058	0.00027
hrq1	hrq1	YMR276W	DSK2		0.64215	0.103	1.00557	0.016	-0.36204	0.103	0.00112
hrq1	hrq1	YPR024W	YME1		0.44371	0.065	0.79981	0.021	-0.36174	0.065	0.00086
hrq1	hrq1	YML070W	DAK1		0.5244	0.043	0.86114	0.088	-0.35789	0.043	0.00224	status=JK
hrq1	hrq1	YMR282C	AEP2		0.64531	0.067	1.00449	0.015	-0.35398	0.067	0.0003
hrq1	hrq1	YGL175C	SAE2		0.64605	0.032	0.99669	0.012	-0.35119	0.032	3e-05
hrq1	hrq1	YLR154C	RNH203		0.65313	0.045	1.0058	0.042	-0.3469	0.045	9e-05
hrq1	hrq1	YKR097W	PCK1		0.64013	0.019	1.00307	0.037	-0.34517	0.019	0.00028	status=JK
hrq1	hrq1	YOR144C	ELG1		0.59617	0.054	0.93661	0.039	-0.33863	0.054	0.0002
hrq1	hrq1	YMR265C	YMR265C		0.71825	0.071	1.05229	0.07	-0.33245	0.071	0.00026
hrq1	hrq1	YMR165C	PAH1		0.47325	0.028	0.83915	0.126	-0.32717	0.028	6e-05
hrq1	hrq1	YOR080W	DIA2		0.22916	0.041	0.54943	0.006	-0.31952	0.041	0.00149
hrq1	hrq1	YBR093C	PHO5		0.61365	0.038	0.9307	0.017	-0.31711	0.038	6e-05
hrq1	hrq1	YDL074C	BRE1		0.50473	0.023	0.81912	0.032	-0.31146	0.023	0.00071	status=JK
hrq1	hrq1	YAL024C	LTE1		0.69124	0.113	0.97879	0.033	-0.29518	0.113	0.00118
hrq1	hrq1	YMR191W	SPG5		0.7631	0.028	1.05869	0.005	-0.29355	0.028	0.00044	status=JK
hrq1	hrq1	YBL031W	SHE1		0.16384	0.011	0.59598	0.559	-0.29302	0.011	0.00153	status=JK
hrq1	hrq1	YHR041C	SRB2		0.47882	0.083	0.77423	0.047	-0.29301	0.083	0.00139
hrq1	hrq1	YMR183C	SSO2		0.71364	0.089	1.00538	0.051	-0.29225	0.089	0.00053
hrq1	hrq1	YMR196W	YMR196W		0.76079	0.082	1.04701	0.018	-0.29171	0.082	0.00035
hrq1	hrq1	YDL013W	SLX5		0.205	0.037	0.48716	0.035	-0.29162	0.037	0.00152
hrq1	hrq1	YBL079W	NUP170		0.49842	0.034	0.79017	0.08	-0.28826	0.034	0.00155	status=JK
hrq1	hrq1	YMR258C	ROY1		0.72113	0.11	1.0107	0.099	-0.28764	0.11	0.00097
hrq1	hrq1	YGL007W	YGL007W		0.54428	0.027	0.83687	0.051	-0.28671	0.027	3e-05
hrq1	hrq1	YGR281W	YOR1		0.68785	0.091	0.96347	0.055	-0.28078	0.091	0.00062
hrq1	hrq1	YNL072W	RNH201		0.19152	0.027	0.50779	0.408	-0.28018	0.027	0.00636	status=JK
hrq1	hrq1	YMR017W	SPO20		0.71741	0.163	1.00313	0.017	-0.28013	0.163	0.00311
hrq1	hrq1	YOR025W	HST3		0.74388	0.012	1.02278	0.039	-0.27883	0.012	8e-05	status=JK
hrq1	hrq1	YMR262W	YMR262W		0.75399	0.135	1.02841	0.014	-0.27533	0.135	0.00154
hrq1	hrq1	YCL061C	MRC1		0.68306	0.031	0.95593	0.01	-0.27497	0.031	3e-05
hrq1	hrq1	YER116C	SLX8		0.4299	0.061	0.69712	0.023	-0.27332	0.061	0.00077
hrq1	hrq1	YMR182C	RGM1		0.76128	0.104	1.03114	0.053	-0.27096	0.104	0.00069
hrq1	hrq1	YMR269W	TMA23		0.50912	0.021	0.77965	0.037	-0.27075	0.021	2e-05
hrq1	hrq1	YMR205C	PFK2		0.56861	0.128	0.81889	0.104	-0.27053	0.128	0.003
hrq1	hrq1	YMR256C	COX7		0.77698	0.095	1.04594	0.021	-0.26871	0.095	0.0005
hrq1	hrq1	YDL077C	VAM6		0.1473	0.056	0.43141	0.238	-0.26819	0.056	0.01338
hrq1	hrq1	YKL150W	MCR1		0.70546	0.354	0.95361	0.045	-0.26641	0.353	0.02819
hrq1	hrq1	YHR077C	NMD2		0.78354	0.075	1.04696	0.03	-0.26423	0.075	0.00024
hrq1	hrq1	YMR186W	HSC82		0.72997	0.004	0.99762	0.029	-0.26264	0.004	1e-05	status=JK
hrq1	hrq1	YHR067W	HTD2		0.35573	0.035	0.61509	0.005	-0.26251	0.035	0.00324	status=JK
hrq1	hrq1	YJR043C	POL32		0.64945	0.04	0.91502	0.017	-0.26102	0.04	6e-05
hrq1	hrq1	YMR172C-A	YMR172C-A		0.74759	0.03	1.00791	0.021	-0.2567	0.03	0.00054	status=JK
hrq1	hrq1	YBL072C	RPS8A		0.51298	0.209	0.75923	0.035	-0.25652	0.209	0.01618
hrq1	hrq1	YMR199W	CLN1		0.77205	0.041	1.02565	0.038	-0.25631	0.041	4e-05
hrq1	hrq1	YBR289W	SNF5		0.26022	0.056	0.50655	0.064	-0.25481	0.056	0.00269
hrq1	hrq1	YOR033C	EXO1		0.78689	0.051	1.03195	0.04	-0.25245	0.051	8e-05
hrq1	hrq1	YMR194W	RPL36A		0.64328	0.084	0.89039	0.033	-0.25205	0.084	0.0006
hrq1	hrq1	YNL117W	MLS1		0.54387	0.054	0.82537	0.139	-0.25183	0.054	0.00027
hrq1	hrq1	YJR084W	YJR084W		0.69003	0.28	0.91763	0.114	-0.2512	0.28	0.01598
hrq1	hrq1	YMR245W	YMR245W		0.69758	0.099	0.96248	0.09	-0.24944	0.099	0.00077
hrq1	hrq1	YLR320W	MMS22		0.36107	0.037	0.62611	0.067	-0.24807	0.037	0.00355	status=JK
hrq1	hrq1	YML066C	SMA2		0.31033	0.021	0.53418	0.138	-0.24724	0.021	0.00159	status=JK
hrq1	hrq1	YGR188C	BUB1		0.44706	0.081	0.69618	0.027	-0.24403	0.081	0.00159
hrq1	hrq1	YHL036W	MUP3		0.50567	0.107	0.74232	0.344	-0.24387	0.107	0.0147	status=CP,JK
hrq1	hrq1	YMR187C	YMR187C		0.77224	0.019	1.00133	0.038	-0.24056	0.019	0.00019	status=JK
hrq1	hrq1	YGL241W	KAP114		0.79565	0.101	1.00206	0.155	-0.23973	0.101	0.00055
hrq1	hrq1	YHL045W	YHL045W		0.80569	0.106	1.03466	0.112	-0.23875	0.106	0.00061
hrq1	hrq1	YMR304C-A	YMR304C-A		0.7275	0.195	0.96407	0.011	-0.23833	0.195	0.00496
hrq1	hrq1	YCR077C	PAT1		0.60993	0.07	0.84239	0.013	-0.23596	0.07	0.00041
hrq1	hrq1	YOR141C	ARP8		0.10349	0.013	0.44171	0.457	-0.23446	0.013	0.00535	status=CP,JK
hrq1	hrq1	YIL161W	YIL161W		0.76687	0.228	1.01712	0.113	-0.23394	0.228	0.00672
hrq1	hrq1	YJL207C	LAA1		0.77212	0.076	1.0106	0.039	-0.2334	0.076	0.00026
hrq1	hrq1	YMR251W-A	HOR7		0.6571	0.056	0.8794	0.054	-0.23087	0.056	0.00017
hrq1	hrq1	YMR177W	MMT1		0.82036	0.016	1.04898	0.007	-0.22955	0.016	0
hrq1	hrq1	YJL079C	PRY1		0.82951	0.126	1.05047	0.026	-0.22848	0.125	0.00094
hrq1	hrq1	YPR050C	YPR050C		0.69336	0.312	0.91199	0.048	-0.22793	0.312	0.02114
hrq1	hrq1	YMR189W	GCV2		0.77193	0.056	0.99689	0.003	-0.22517	0.056	0.0001
hrq1	hrq1	YOL081W	IRA2		0.6396	0.038	0.8714	0.063	-0.22497	0.038	0.00119	status=JK
hrq1	hrq1	YMR169C	ALD3		0.80951	0.1	1.03762	0.035	-0.22445	0.1	0.00052
hrq1	hrq1	YMR172W	HOT1		0.80305	0.069	1.01224	0.059	-0.22314	0.069	0.00017
hrq1	hrq1	YGR055W	MUP1		0.61977	0.16	0.84693	0.021	-0.22292	0.16	0.0045
hrq1	hrq1	YPL270W	MDL2		0.82542	0.202	1.00527	0.077	-0.22232	0.202	0.00384
hrq1	hrq1	YMR300C	ADE4		0.8689	0.012	1.0887	0.005	-0.21975	0.012	7e-05	status=JK
hrq1	hrq1	YJR059W	PTK2		0.80777	0.008	1.02866	0.016	-0.219	0.008	3e-05	status=JK
hrq1	hrq1	YGL215W	CLG1		0.75774	0.027	0.97662	0.059	-0.2187	0.027	0.00041	status=JK
hrq1	hrq1	YMR266W	RSN1		0.77891	0.047	0.99914	0.005	-0.21851	0.047	6e-05
hrq1	hrq1	YMR179W	SPT21		0.55715	0.098	0.78764	0.078	-0.21818	0.098	0.00148
hrq1	hrq1	YDR124W	YDR124W		0.98095	0.038	1.20441	0.043	-0.21655	0.038	2e-05
hrq1	hrq1	YMR202W	ERG2		0.55005	0.129	0.77448	0.057	-0.21629	0.129	0.00341
hrq1	hrq1	YKL094W	YJU3		0.76537	0.313	0.96006	0.098	-0.21601	0.313	0.01642
hrq1	hrq1	YCL060C	YCL060C		0.75029	0.068	0.98143	0.057	-0.21502	0.068	0.0002
hrq1	hrq1	YPR051W	MAK3		0.77409	0.2	0.97895	0.018	-0.21342	0.2	0.0045
hrq1	hrq1	YMR188C	MRPS17		0.77586	0.116	0.99489	0.031	-0.21281	0.116	0.00091
hrq1	hrq1	YPL245W	YPL245W		0.8815	0.068	1.09699	0.006	-0.21234	0.068	0.00012
hrq1	hrq1	YHR021C	RPS27B		0.46123	0.06	0.66925	0.025	-0.20998	0.06	0.00061
hrq1	hrq1	YMR254C	YMR254C		0.75428	0.061	0.96716	0.051	-0.20926	0.061	0.00015
hrq1	hrq1	YOL012C	HTZ1		0.68705	0.17	0.89601	0.025	-0.20854	0.17	0.00398
hrq1	hrq1	YOL006C	TOP1		0.54856	0.091	0.74622	0.043	-0.20842	0.091	0.00123
hrq1	hrq1	YOR343C	YOR343C		0.80804	0.341	1.01229	0.014	-0.20196	0.34	0.01776
hrq1	hrq1	YDR095C	YDR095C		0.93508	0.065	1.13795	0.022	-0.2017	0.065	9e-05
hrq1	hrq1	YMR153C-A	YMR153C-A		0.8451	0.103	1.03769	0.032	-0.20143	0.103	0.00049
hrq1	hrq1	YPL140C	MKK2		0.71908	0.02	0.91849	0.005	-0.20077	0.02	0.00025	status=JK
hrq1	hrq1	YMR132C	JLP2		0.82407	0.033	1.0233	0.053	-0.19969	0.033	0.00054	status=JK
hrq1	hrq1	YMR206W	YMR206W		0.81464	0.028	1.01687	0.021	-0.19863	0.028	0.00039	status=JK
hrq1	hrq1	YNR066C	YNR066C		0.81044	0.286	1.02187	0.045	-0.19789	0.286	0.01087
hrq1	hrq1	YLR373C	VID22		0.66546	0.128	0.87112	0.033	-0.19744	0.128	0.00189
hrq1	hrq1	YER120W	SCS2		0.66035	0.017	0.85797	0.046	-0.19731	0.017	0.00023	status=JK
hrq1	hrq1	YHR178W	STB5		0.4634	0.08	0.64753	0.047	-0.1957	0.08	0.00138
hrq1	hrq1	YNR010W	CSE2		0.50092	0.231	0.72093	0.2	-0.19516	0.231	0.0226
hrq1	hrq1	YPL069C	BTS1		0.35714	0.107	0.54698	0.036	-0.19426	0.107	0.00694
hrq1	hrq1	YKR016W	FCJ1		0.76218	0.07	0.95221	0.017	-0.19138	0.07	0.00021
hrq1	hrq1	YMR158W-A	YMR158W-A		0.85749	0.06	1.04853	0.019	-0.19055	0.06	9e-05
hrq1	hrq1	YDR186C	YDR186C		0.86375	0.015	1.0524	0.01	-0.19024	0.015	9e-05	status=JK
hrq1	hrq1	YDL185W	VMA1		0.84804	0.038	1.03663	0.018	-0.18968	0.038	2e-05
hrq1	hrq1	YMR181C	YMR181C		0.83408	0.031	1.02582	0.042	-0.18935	0.031	0.00046	status=JK
hrq1	hrq1	YMR263W	SAP30		0.87233	0.053	1.06213	0.047	-0.18838	0.053	6e-05
hrq1	hrq1	YJL172W	CPS1		0.88592	0.29	1.07087	0.009	-0.18823	0.29	0.00884
hrq1	hrq1	YNR045W	PET494		0.84887	0.242	1.02946	0.014	-0.18746	0.242	0.00593
hrq1	hrq1	YOL013C	HRD1		0.7084	0.146	0.88581	0.054	-0.18729	0.146	0.00232
hrq1	hrq1	YMR173W-A	YMR173W-A		0.83801	0.094	1.01589	0.039	-0.18682	0.093	0.00038
hrq1	hrq1	YKL041W	VPS24		0.53129	0.105	0.71049	0.022	-0.18639	0.105	0.00206
hrq1	hrq1	YPL055C	LGE1		0.60108	0.011	0.79386	0.024	-0.18617	0.011	0.00011	status=JK
hrq1	hrq1	YDR539W	FDC1		0.78248	0.042	0.97597	0.04	-0.18454	0.042	4e-05
hrq1	hrq1	YJL144W	YJL144W		0.85862	0.032	1.04102	0.029	-0.18255	0.032	0.00046	status=JK
hrq1	hrq1	YMR167W	MLH1		0.70843	0.18	0.9001	0.034	-0.18206	0.18	0.00426
hrq1	hrq1	YDR120C	TRM1		0.94871	0.024	1.13338	0.045	-0.18151	0.024	0.00022	status=JK
hrq1	hrq1	YPR191W	QCR2		0.56232	0.012	0.74712	0.098	-0.17967	0.012	0.00015	status=JK
hrq1	hrq1	YIL077C	YIL077C		0.82143	0.076	1.00483	0.02	-0.17848	0.076	0.00022
hrq1	hrq1	YDR125C	ECM18		1.01485	0.078	1.1995	0.042	-0.17779	0.078	0.00013
hrq1	hrq1	YHR025W	THR1		0.49478	0.065	0.67269	0.02	-0.17763	0.065	0.0006
hrq1	hrq1	YGR270W	YTA7		0.68073	0.089	0.85763	0.045	-0.17694	0.089	0.00061
hrq1	hrq1	YMR170C	ALD2		0.91517	0.151	1.09325	0.017	-0.17559	0.151	0.0012
hrq1	hrq1	YMR253C	YMR253C		0.86794	0.022	1.04931	0.014	-0.17492	0.022	0
hrq1	hrq1	YGR019W	UGA1		0.30984	0.136	0.56632	0.311	-0.17153	0.136	0.01994
hrq1	hrq1	YDR117C	TMA64		0.91272	0.028	1.08461	0.008	-0.16904	0.028	0.00032	status=JK
hrq1	hrq1	YKR065C	PAM17		0.79534	0.112	0.98313	0.037	-0.16897	0.112	0.00653	status=JK
hrq1	hrq1	YGL063W	PUS2		0.84634	0.147	1.00808	0.034	-0.16879	0.147	0.00996	status=JK
hrq1	hrq1	YJR125C	ENT3		0.83799	0.276	0.99785	0.052	-0.16843	0.276	0.00899
hrq1	hrq1	YDR126W	SWF1		0.88545	0.025	1.04758	0.037	-0.16818	0.025	1e-05
hrq1	hrq1	YOR017W	PET127		0.5796	0.104	0.74099	0.013	-0.16678	0.103	0.00153
hrq1	hrq1	YMR162C	DNF3		0.90203	0.101	1.06641	0.014	-0.16548	0.101	0.00039
hrq1	hrq1	YKL218C	SRY1		0.85443	0.046	1.01027	0.016	-0.16492	0.046	0.00096	status=JK
hrq1	hrq1	YMR164C	MSS11		0.81852	0.105	0.98557	0.018	-0.16407	0.104	0.00057
hrq1	hrq1	YCL024W	KCC4		0.78366	0.342	0.93006	0.104	-0.16268	0.341	0.01944
hrq1	hrq1	YMR160W	YMR160W		0.85537	0.166	1.00963	0.068	-0.16249	0.165	0.00194
hrq1	hrq1	YLR448W	RPL6B		0.64499	0.302	0.76106	0.209	-0.1617	0.302	0.02354
hrq1	hrq1	YMR193C-A	YMR193C-A		0.64679	0.138	0.79879	0.056	-0.16096	0.138	0.00256
hrq1	hrq1	YKR082W	NUP133		0.60136	0.037	0.77432	0.068	-0.16003	0.037	0.00127	status=JK
hrq1	hrq1	YDR420W	HKR1		0.90401	0.059	1.04941	0.056	-0.15811	0.059	7e-05
hrq1	hrq1	YDR121W	DPB4		1.00981	0.041	1.16979	0.026	-0.15735	0.041	2e-05
hrq1	hrq1	YOR339C	UBC11		0.77802	0.134	0.92574	0.053	-0.15688	0.134	0.00138
hrq1	hrq1	YMR176W	ECM5		0.83477	0.03	0.99568	0.009	-0.1566	0.03	1e-05
hrq1	hrq1	YHR017W	YSC83		0.44868	0.143	0.58736	0.222	-0.15593	0.143	0.00818
hrq1	hrq1	YOR309C	YOR309C		0.78993	0.046	0.9417	0.039	-0.1554	0.046	5e-05
hrq1	hrq1	YML062C	MFT1		0.60029	0.117	0.75436	0.024	-0.15532	0.117	0.00198
hrq1	hrq1	YBR137W	YBR137W		0.82977	0.081	0.98077	0.024	-0.15531	0.081	0.00026
hrq1	hrq1	YIL056W	VHR1		0.85535	0.064	1.00282	0.057	-0.155	0.064	0.00011
hrq1	hrq1	YKL128C	PMU1		0.87151	0.014	1.02689	0.008	-0.1546	0.014	8e-05	status=JK
hrq1	hrq1	YLR335W	NUP2		0.90528	0.02	1.05479	0.041	-0.15132	0.02	0.00016	status=JK
hrq1	hrq1	YDR122W	KIN1		1.04603	0.038	1.19897	0.014	-0.15083	0.038	1e-05
hrq1	hrq1	YCR033W	SNT1		0.81349	0.044	0.96321	0.004	-0.14789	0.044	4e-05
hrq1	hrq1	YGL096W	TOS8		0.86197	0.005	0.99499	0.056	-0.14536	0.005	1e-05	status=JK
hrq1	hrq1	YLR418C	CDC73		0.84819	0.078	0.99898	0.036	-0.14471	0.078	0.00022
hrq1	hrq1	YPL180W	TCO89		0.45082	0.11	0.60634	0.051	-0.1442	0.11	0.0192	status=JK
hrq1	hrq1	YMR153W	NUP53		0.87277	0.043	1.01564	0.038	-0.1433	0.043	3e-05
hrq1	hrq1	YHR061C	GIC1		0.28321	0.137	0.42177	0.133	-0.14327	0.136	0.02546
hrq1	hrq1	YGR206W	MVB12		0.86746	0.019	1.00274	0.034	-0.14071	0.019	0.00016	status=JK
hrq1	hrq1	YOL107W	YOL107W		0.89144	0.13	1.03796	0.023	-0.14056	0.13	0.00084
hrq1	hrq1	YCR053W	THR4		0.76841	0.019	0.90387	0.01	-0.13943	0.019	0.0002	status=JK
hrq1	hrq1	YKR028W	SAP190		0.87363	0.012	1.00665	0.02	-0.1394	0.012	6e-05	status=JK
hrq1	hrq1	YMR171C	EAR1		0.90794	0.044	1.04759	0.047	-0.13912	0.044	0.00078	status=JK
hrq1	hrq1	YKR027W	BCH2		0.88668	0.009	1.02534	0.014	-0.13862	0.009	3e-05	status=JK
hrq1	hrq1	YDR001C	NTH1		0.91595	0.012	1.05454	0.006	-0.13855	0.012	6e-05	status=JK
hrq1	hrq1	YGR225W	AMA1		0.87645	0.096	1.01073	0.01	-0.13815	0.096	0.00036
hrq1	hrq1	YDR100W	TVP15		1.00996	0.008	1.14925	0.017	-0.13748	0.008	0
hrq1	hrq1	YDR098C	GRX3		1.00583	0.049	1.1453	0.051	-0.13683	0.049	3e-05
hrq1	hrq1	YLR281C	YLR281C		0.86899	0.015	1.00554	0.013	-0.1358	0.015	0.0001	status=JK
hrq1	hrq1	YLR130C	ZRT2		0.88595	0.039	1.01819	0.027	-0.13504	0.039	2e-05
hrq1	hrq1	YIL113W	SDP1		0.91113	0.147	1.03239	0.031	-0.13431	0.147	0.00113
hrq1	hrq1	YOR269W	PAC1		0.8501	0.086	0.98044	0.007	-0.13361	0.086	0.00028
hrq1	hrq1	YPL172C	COX10		0.8014	0.07	0.9424	0.054	-0.13357	0.07	0.00019
hrq1	hrq1	YDL056W	MBP1		0.96595	0.092	1.09011	0.046	-0.13342	0.092	0.00024
hrq1	hrq1	YMR180C	CTL1		0.897	0.127	1.0269	0.021	-0.13279	0.127	0.00077
hrq1	hrq1	YER152C	YER152C		0.92168	0.066	1.05002	0.018	-0.13208	0.066	0.0001
hrq1	hrq1	YDR128W	MTC5		0.81726	0.007	0.94763	0.012	-0.13129	0.007	0
hrq1	hrq1	YDL078C	MDH3		0.84029	0.161	0.94537	0.114	-0.13104	0.16	0.00186
hrq1	hrq1	YFL007W	BLM10		0.91066	0.077	1.03826	0.003	-0.13048	0.077	0.00017
hrq1	hrq1	YJR149W	YJR149W		0.90427	0.112	1.02558	0.035	-0.12963	0.112	0.00052
hrq1	hrq1	YHR167W	THP2		0.86226	0.092	0.99859	0.033	-0.12884	0.092	0.00033
hrq1	hrq1	YMR145C	NDE1		0.9269	0.094	1.0511	0.045	-0.12879	0.094	0.00029
hrq1	hrq1	YCL016C	DCC1		0.77966	0.042	0.89737	0.045	-0.12877	0.042	4e-05
hrq1	hrq1	YOL108C	INO4		0.43119	0.011	0.55145	0.043	-0.12799	0.011	0.00021	status=JK
hrq1	hrq1	YMR163C	INP2		0.82661	0.118	0.95239	0.02	-0.12789	0.118	0.00078
hrq1	hrq1	YCL023C	YCL023C		0.89012	0.126	1.01329	0.063	-0.12786	0.125	0.00076
hrq1	hrq1	YPL054W	LEE1		0.81281	0.129	0.9475	0.08	-0.12743	0.129	0.00107
hrq1	hrq1	YML041C	VPS71		0.82975	0.068	0.95604	0.089	-0.12647	0.068	0.00015
hrq1	hrq1	YDR112W	YDR112W		1.03676	0.037	1.1488	0.043	-0.12484	0.037	1e-05
hrq1	hrq1	YKL157W	APE2		0.91189	0.06	1.04121	0.045	-0.12455	0.06	8e-05
hrq1	hrq1	YJL187C	SWE1		0.45129	0.238	0.61612	0.317	-0.12406	0.237	0.03201
hrq1	hrq1	YDR096W	GIS1		0.96832	0.039	1.09056	0.022	-0.12383	0.039	2e-05
hrq1	hrq1	YGL180W	ATG1		0.87737	0.037	0.99262	0.047	-0.12323	0.037	2e-05
hrq1	hrq1	YNR006W	VPS27		0.56343	0.07	0.69559	0.05	-0.12282	0.07	0.00506	status=JK
hrq1	hrq1	YLR079W	SIC1		0.53036	0.057	0.65638	0.023	-0.12183	0.057	0.00035
hrq1	hrq1	YOR358W	HAP5		0.82574	0.377	0.95858	0.127	-0.12168	0.376	0.02198
hrq1	hrq1	YGR238C	KEL2		0.84085	0.277	0.94829	0.064	-0.12154	0.277	0.00897
hrq1	hrq1	YKL140W	TGL1		0.93169	0.076	1.05542	0.007	-0.12121	0.076	0.00015
hrq1	hrq1	YML028W	TSA1		0.78028	0.059	0.89855	0.01	-0.12073	0.059	0.00012
hrq1	hrq1	YHL013C	OTU2		0.90215	0.089	1.0143	0.025	-0.12048	0.089	0.00026
hrq1	hrq1	YJL208C	NUC1		0.90808	0.184	1.02181	0.045	-0.12018	0.184	0.00223
hrq1	hrq1	YPL184C	MRN1		0.90535	0.015	1.02704	0.016	-0.12009	0.015	9e-05	status=JK
hrq1	hrq1	YDR107C	TMN2		0.99628	0.062	1.10802	0.033	-0.11984	0.062	7e-05
hrq1	hrq1	YNL111C	CYB5		0.94941	0.054	1.07274	0.022	-0.11955	0.054	5e-05
hrq1	hrq1	YBR151W	APD1		0.91077	0.054	1.03547	0.062	-0.11941	0.054	6e-05
hrq1	hrq1	YMR155W	YMR155W		0.91336	0.019	1.02942	0.011	-0.11906	0.019	0.00014	status=JK
hrq1	hrq1	YNL105W	YNL105W		0.76071	0.199	0.88321	0.065	-0.11905	0.199	0.00463
hrq1	hrq1	YDR488C	PAC11		0.87672	0.059	0.9791	0.053	-0.11872	0.059	0.00149	status=JK
hrq1	hrq1	YOR087W	YVC1		0.86055	0.045	0.97418	0.026	-0.1187	0.045	0.0009	status=JK
hrq1	hrq1	YLR125W	YLR125W		0.90562	0.063	1.0233	0.005	-0.11861	0.063	9e-05
hrq1	hrq1	YIL153W	RRD1		0.88013	0.045	1.00073	0.005	-0.11788	0.045	4e-05
hrq1	hrq1	YJR133W	XPT1		0.89795	0.244	1.00097	0.042	-0.1172	0.244	0.00521
hrq1	hrq1	YMR116C	ASC1		0.59005	0.161	0.70469	0.022	-0.11691	0.16	0.0052
hrq1	hrq1	YPL022W	RAD1		0.81186	0.013	0.90765	0.067	-0.11684	0.013	9e-05	status=JK
hrq1	hrq1	YML048W	GSF2		0.86526	0.017	0.97718	0.023	-0.11682	0.017	0.00013	status=JK
hrq1	hrq1	YOR355W	GDS1		0.77536	0.02	0.88646	0.039	-0.1167	0.02	0.00023	status=JK
hrq1	hrq1	YMR154C	RIM13		0.77148	0.166	0.89042	0.029	-0.11629	0.166	0.00262
hrq1	hrq1	YDR458C	HEH2		1.00385	0.032	1.1018	0.099	-0.11612	0.032	1e-05
hrq1	hrq1	YOR228C	YOR228C		0.88905	0.215	1.00088	0.027	-0.11603	0.215	0.0037
hrq1	hrq1	YMR204C	INP1		0.74525	0.298	0.86912	0.045	-0.11596	0.298	0.01534
hrq1	hrq1	YOR005C	DNL4		0.97321	0.033	1.09338	0.015	-0.11538	0.033	1e-05
hrq1	hrq1	YDR099W	BMH2		0.93395	0.006	1.04783	0.012	-0.11506	0.006	1e-05	status=JK
hrq1	hrq1	YOL090W	MSH2		0.78599	0.092	0.8953	0.043	-0.11445	0.092	0.00044
hrq1	hrq1	YGL219C	MDM34		0.73481	0.022	0.84814	0.005	-0.11444	0.022	0.00031	status=JK
hrq1	hrq1	YML053C	YML053C		0.86849	0.013	0.98451	0.035	-0.11373	0.013	8e-05	status=JK
hrq1	hrq1	YPL226W	NEW1		0.73786	0.035	0.85556	0.052	-0.11316	0.035	3e-05
hrq1	hrq1	YER119C-A	YER119C-A		0.80385	0.03	0.91069	0.032	-0.11286	0.03	1e-05
hrq1	hrq1	YDR482C	CWC21		0.90895	0.064	0.98895	0.103	-0.11253	0.064	0.0001
hrq1	hrq1	YBR105C	VID24		0.85046	0.032	0.9684	0.033	-0.11242	0.032	1e-05
hrq1	hrq1	YOR094W	ARF3		0.97271	0.064	1.07369	0.067	-0.11204	0.064	8e-05
hrq1	hrq1	YGR039W	YGR039W		0.96924	0.076	1.08262	0.011	-0.11175	0.076	0.00013
hrq1	hrq1	YGL194C	HOS2		0.8646	0.059	0.97265	0.008	-0.11151	0.059	9e-05
hrq1	hrq1	YIL057C	RGI2		0.91338	0.072	1.0209	0.006	-0.11144	0.072	0.00014
hrq1	hrq1	YPL263C	KEL3		0.79703	0.262	0.89635	0.045	-0.11108	0.261	0.00888
hrq1	hrq1	YDR061W	YDR061W		0.98326	0.018	1.08942	0.022	-0.11057	0.018	0.00011	status=JK
hrq1	hrq1	YML059C	NTE1		0.93241	0.017	1.0441	0.038	-0.11038	0.017	0.00012	status=JK
hrq1	hrq1	YOR011W	AUS1		0.95547	0.136	1.06908	0.012	-0.11023	0.136	0.00078
hrq1	hrq1	YGL146C	RRT6		0.82583	0.034	0.93385	0.021	-0.11015	0.034	0.00055	status=JK
hrq1	hrq1	YDR110W	FOB1		1.05211	0.053	1.16623	0.022	-0.11	0.053	4e-05
hrq1	hrq1	YDR406W	PDR15		0.90419	0.062	1.01438	0.031	-0.10979	0.062	9e-05
hrq1	hrq1	YOR093C	YOR093C		0.73106	0.042	0.8517	0.04	-0.10968	0.042	5e-05
hrq1	hrq1	YML095C	RAD10		0.94074	0.088	1.04232	0.021	-0.10935	0.088	0.00023
hrq1	hrq1	YKL085W	MDH1		0.87777	0.076	0.98891	0.046	-0.10928	0.076	0.00018
hrq1	hrq1	YNR060W	FRE4		0.84582	0.041	0.95286	0.067	-0.10918	0.041	3e-05
hrq1	hrq1	YAL027W	SAW1		0.89782	0.03	1.00779	0.033	-0.1084	0.03	1e-05
hrq1	hrq1	YLR452C	SST2		0.72085	0.154	0.82139	0.051	-0.10812	0.154	0.00257
hrq1	hrq1	YBR121C	GRS1		0.88477	0.071	0.99526	0.019	-0.10757	0.071	0.00014
hrq1	hrq1	YLR313C	SPH1		0.85938	0.397	0.95663	0.021	-0.10739	0.397	0.02272
hrq1	hrq1	YDL059C	RAD59		0.96324	0.031	1.07736	0.049	-0.10731	0.031	1e-05
hrq1	hrq1	YBR118W	TEF2		0.88215	0.014	0.98073	0.046	-0.10715	0.014	0
hrq1	hrq1	YOR126C	IAH1		0.94492	0.037	1.05891	0.054	-0.10661	0.037	0.00051	status=JK
hrq1	hrq1	YAR031W	PRM9		0.92786	0.087	1.0376	0.019	-0.10657	0.087	0.00022
hrq1	hrq1	YOL104C	NDJ1		0.90868	0.013	1.00146	0.066	-0.1061	0.013	7e-05	status=JK
hrq1	hrq1	YDR032C	PST2		0.91048	0.145	1.00761	0.035	-0.10603	0.145	0.00109
hrq1	hrq1	YMR305C	SCW10		0.89559	0.075	0.99679	0.019	-0.10546	0.075	0.00016
hrq1	hrq1	YOL085C	YOL085C		0.74935	0.29	0.85378	0.045	-0.10501	0.29	0.0141
hrq1	hrq1	YOR301W	RAX1		0.96365	0.098	1.05662	0.048	-0.10488	0.098	0.00029
hrq1	hrq1	YMR175W	SIP18		0.89258	0.027	0.99593	0.019	-0.10477	0.027	1e-05
hrq1	hrq1	YGL237C	HAP2		0.41304	0.137	0.58948	0.332	-0.10459	0.137	0.00917
hrq1	hrq1	YOR026W	BUB3		0.66286	0.034	0.77879	0.05	-0.10434	0.034	4e-05
hrq1	hrq1	YOR156C	NFI1		0.9186	0.058	1.02263	0.03	-0.10434	0.058	7e-05
hrq1	hrq1	YAR003W	SWD1		0.818	0.032	0.92281	0.01	-0.10427	0.032	2e-05
hrq1	hrq1	YDR538W	PAD1		0.93006	0.061	1.02466	0.057	-0.10418	0.061	8e-05
hrq1	hrq1	YLR104W	LCL2		0.91254	0.037	1.01224	0.034	-0.10412	0.037	2e-05
hrq1	hrq1	YNL143C	YNL143C		0.91493	0.021	1.02221	0.012	-0.10411	0.021	0.00017	status=JK
hrq1	hrq1	YMR140W	SIP5		0.96526	0.09	1.06066	0.036	-0.10405	0.09	0.00022
hrq1	hrq1	YJL124C	LSM1		0.7538	0.075	0.8636	0.018	-0.10387	0.074	0.00026
hrq1	hrq1	YPL162C	YPL162C		0.91401	0.121	1.00939	0.048	-0.10334	0.121	0.00063
hrq1	hrq1	YNL130C	CPT1		0.90974	0.086	1.01011	0.025	-0.1033	0.086	0.00023
hrq1	hrq1	YPL027W	SMA1		0.92027	0.027	1.02479	0.003	-0.10298	0.027	0.00028	status=JK
hrq1	hrq1	YMR219W	ESC1		0.92315	0.036	1.02555	0.027	-0.10286	0.036	2e-05
hrq1	hrq1	YDR111C	ALT2		0.99792	0.062	1.10495	0.026	-0.10256	0.062	7e-05
hrq1	hrq1	YDL162C	YDL162C		0.88466	0.032	0.99567	0.03	-0.10242	0.032	1e-05
hrq1	hrq1	YOL016C	CMK2		0.99767	0.034	1.1003	0.01	-0.10236	0.034	1e-05
hrq1	hrq1	YMR174C	PAI3		0.90729	0.111	1.01188	0.02	-0.10231	0.11	0.00049
hrq1	hrq1	YIL066C	RNR3		0.93928	0.128	1.03721	0.034	-0.10192	0.128	0.00068
hrq1	hrq1	YOR342C	YOR342C		0.90788	0.07	1.01154	0.022	-0.10191	0.07	0.00013
hrq1	hrq1	YLR063W	YLR063W		0.91018	0.184	1.0207	0.048	-0.10167	0.184	0.0022
hrq1	hrq1	YIL009C-A	EST3		0.9886	0.034	1.09104	0.01	-0.10158	0.034	1e-05
hrq1	hrq1	YHR014W	SPO13		0.8731	0.058	0.97406	0.039	-0.10098	0.057	8e-05
hrq1	hrq1	YBL091C	MAP2		0.9156	0.086	1.02485	0.018	-0.1007	0.086	0.00023
hrq1	hrq1	YGL127C	SOH1		0.565	0.131	0.64859	0.08	-0.10062	0.131	0.00327
hrq1	hrq1	YMR156C	TPP1		0.94692	0.136	1.04672	0.026	-0.10058	0.136	0.00081
hrq1	hrq1	YLR023C	IZH3		0.90162	0.076	1.00022	0.007	-0.10047	0.076	0.00016
hrq1	hrq1	YOR220W	RCN2		0.95359	0.063	1.05014	0.008	-0.10026	0.063	8e-05
hrq1	hrq1	YLR338W	YLR338W		0.70564	0.099	0.80232	0.043	-0.09977	0.099	0.00075
hrq1	hrq1	YKL025C	PAN3		0.94036	0.111	1.0415	0.026	-0.0996	0.111	0.00045
hrq1	hrq1	YHL021C	AIM17		0.92619	0.091	1.02563	0.009	-0.09957	0.09	0.00026
hrq1	hrq1	YJL148W	RPA34		0.74619	0.027	0.8476	0.005	-0.09957	0.027	1e-05
hrq1	hrq1	YLR252W	YLR252W		0.92981	0.028	1.03218	0.016	-0.09951	0.028	0.00031	status=JK
hrq1	hrq1	YHR112C	YHR112C		0.92518	0.084	1.02493	0.011	-0.09941	0.084	0.0002
hrq1	hrq1	YNR030W	ALG12		1.01091	0.075	1.10921	0.005	-0.09911	0.075	0.00011
hrq1	hrq1	YMR209C	YMR209C		0.91215	0.022	1.00993	0.041	-0.09889	0.022	0.00019	status=JK
hrq1	hrq1	YBR177C	EHT1		0.93842	0.041	1.03822	0.015	-0.09885	0.041	2e-05
hrq1	hrq1	YMR291W	TDA1		0.8877	0.241	0.99107	0.076	-0.09872	0.241	0.00519
hrq1	hrq1	YHR034C	PIH1		0.83418	0.014	0.92823	0.014	-0.09849	0.014	0
hrq1	hrq1	YCR009C	RVS161		0.84636	0.064	0.94628	0.029	-0.09836	0.064	0.00012
hrq1	hrq1	YLR037C	PAU23		0.89889	0.13	0.9879	0.039	-0.09806	0.13	0.00081
hrq1	hrq1	YNR051C	BRE5		0.7299	0.105	0.83125	0.04	-0.09777	0.105	0.00081
hrq1	hrq1	YKL061W	BLI1		0.8848	0.167	0.99393	0.036	-0.09745	0.167	0.00181
hrq1	hrq1	YGR071C	ENV11		0.96886	0.008	1.07435	0.031	-0.09682	0.008	3e-05	status=JK
hrq1	hrq1	YOR177C	MPC54		0.97828	0.012	1.06335	0.046	-0.09646	0.012	0
hrq1	hrq1	YPR079W	MRL1		0.92885	0.101	1.02009	0.042	-0.09641	0.1	0.00035
hrq1	hrq1	YHR044C	DOG1		0.90919	0.007	0.99108	0.04	-0.09614	0.007	2e-05	status=JK
hrq1	hrq1	YLR268W	SEC22		0.90779	0.038	1.00104	0.007	-0.09598	0.038	2e-05
hrq1	hrq1	YDR465C	RMT2		0.91127	0.012	1.00438	0.027	-0.09501	0.012	6e-05	status=JK
hrq1	hrq1	YER162C	RAD4		0.30529	0.126	0.48775	0.4	-0.09489	0.126	0.01686
hrq1	hrq1	YOR285W	RDL1		0.91186	0.089	0.99292	0.055	-0.09482	0.089	0.00025
hrq1	hrq1	YNL127W	FAR11		0.89789	0.044	0.99235	0.01	-0.09477	0.044	3e-05
hrq1	hrq1	YMR215W	GAS3		0.90605	0.058	0.99591	0.007	-0.09465	0.058	7e-05
hrq1	hrq1	YJL149W	DAS1		0.93986	0.019	1.02971	0.03	-0.09447	0.019	0.00014	status=JK
hrq1	hrq1	YPR135W	CTF4		0.68692	0.017	0.77795	0.03	-0.0944	0.017	0.0002	status=JK
hrq1	hrq1	YPL265W	DIP5		0.91403	0.017	0.99921	0.04	-0.09439	0.017	0.00011	status=JK
hrq1	hrq1	YDR502C	SAM2		0.97454	0.07	1.06674	0.009	-0.09421	0.07	0.0001
hrq1	hrq1	YIL145C	PAN6		0.9829	0.008	1.07013	0.022	-0.09414	0.008	2e-05	status=JK
hrq1	hrq1	YNR034W	SOL1		0.9081	0.031	1.00726	0.043	-0.09404	0.031	0.0004	status=JK
hrq1	hrq1	YMR135C	GID8		0.89986	0.015	1.001	0.034	-0.09372	0.015	9e-05	status=JK
hrq1	hrq1	YAL056W	GPB2		0.91142	0.112	0.97712	0.1	-0.09369	0.112	0.0005
hrq1	hrq1	YJL047C	RTT101		0.86253	0.062	0.95176	0.012	-0.09364	0.062	0.0001
hrq1	hrq1	YIL024C	YIL024C		0.92161	0.069	1.01285	0.017	-0.09363	0.069	0.00011
hrq1	hrq1	YKL151C	YKL151C		0.97782	0.033	1.07219	0.029	-0.09351	0.033	0.00037	status=JK
hrq1	hrq1	YCR059C	YIH1		0.96673	0.031	1.05943	0.031	-0.09333	0.031	1e-05
hrq1	hrq1	YGR049W	SCM4		0.91859	0.101	1.01348	0.019	-0.09325	0.101	0.00036
hrq1	hrq1	YHL003C	LAG1		0.89549	0.095	0.98428	0.056	-0.09312	0.095	0.00033
hrq1	hrq1	YLR178C	TFS1		0.90777	0.144	1.00252	0.058	-0.09309	0.144	0.00107
hrq1	hrq1	YDR006C	SOK1		0.93879	0.054	1.01717	0.068	-0.09304	0.054	5e-05
hrq1	hrq1	YHR158C	KEL1		0.8264	0.101	0.92957	0.056	-0.09303	0.101	0.0005
hrq1	hrq1	YLR111W	YLR111W		0.7396	0.089	0.85018	0.062	-0.09298	0.089	0.00048
hrq1	hrq1	YPR185W	ATG13		0.91431	0.062	1.00121	0.026	-0.09293	0.062	9e-05
hrq1	hrq1	YHR003C	YHR003C		0.91442	0.087	1.01439	0.032	-0.0928	0.087	0.00023
hrq1	hrq1	YJL108C	PRM10		0.93611	0.04	1.03485	0.013	-0.09257	0.04	2e-05
hrq1	hrq1	YOR114W	YOR114W		0.95072	0.01	1.03967	0.058	-0.09238	0.01	4e-05	status=JK
hrq1	hrq1	YGR072W	UPF3		0.91193	0.053	0.99461	0.036	-0.0923	0.053	5e-05
hrq1	hrq1	YOL070C	NBA1		0.95739	0.079	1.04889	0.033	-0.09226	0.079	0.00015
hrq1	hrq1	YJR154W	YJR154W		0.99255	0.023	1.08652	0.015	-0.09225	0.023	0.00017	status=JK
hrq1	hrq1	YPL018W	CTF19		0.91345	0.081	1.00224	0.012	-0.0922	0.081	0.00019
hrq1	hrq1	YDR119W	VBA4		1.00965	0.021	1.0937	0.047	-0.09205	0.021	0
hrq1	hrq1	YOR219C	STE13		0.92907	0.02	1.01284	0.084	-0.09192	0.02	0.00016	status=JK
hrq1	hrq1	YLR410W	VIP1		0.83429	0.029	0.91982	0.032	-0.09178	0.029	0.0004	status=JK
hrq1	hrq1	YML035C-A	YML035C-A		0.93258	0.032	1.02221	0.003	-0.09172	0.032	1e-05
hrq1	hrq1	YKR019C	IRS4		0.8708	0.078	0.96125	0.04	-0.0917	0.078	0.0002
hrq1	hrq1	YHR132W-A	IGO2		0.93057	0.069	1.02928	0.059	-0.09153	0.069	0.00011
hrq1	hrq1	YDR135C	YCF1		0.95197	0.022	1.0353	0.066	-0.09117	0.022	0.00018	status=JK
hrq1	hrq1	YIL101C	XBP1		0.92471	0.065	1.01165	0.023	-0.09116	0.065	9e-05
hrq1	hrq1	YGR017W	YGR017W		0.93018	0.064	1.02662	0.016	-0.09116	0.064	9e-05
hrq1	hrq1	YIL053W	RHR2		0.93946	0.05	1.01682	0.05	-0.09067	0.05	4e-05
hrq1	hrq1	YOR191W	ULS1		0.91475	0.04	1.00731	0.017	-0.09063	0.04	0.00063	status=JK
hrq1	hrq1	YLR087C	CSF1		0.72584	0.11	0.81951	0.035	-0.09056	0.11	0.00095
hrq1	hrq1	YBL027W	RPL19B		0.67336	0.019	0.76213	0.036	-0.09026	0.019	0.00026	status=JK
hrq1	hrq1	YKR067W	GPT2		0.95735	0.085	1.04849	0.033	-0.0897	0.085	0.00019
hrq1	hrq1	YCL069W	VBA3		0.97395	0.076	1.05907	0.014	-0.08966	0.076	0.00013
hrq1	hrq1	YDR181C	SAS4		0.99848	0.056	1.07977	0.02	-0.08964	0.056	5e-05
hrq1	hrq1	YPL003W	ULA1		0.9224	0.026	1.01088	0.011	-0.08944	0.026	0.00026	status=JK
hrq1	hrq1	YBR201W	DER1		0.93615	0.067	1.01963	0.031	-0.08937	0.067	0.0001
hrq1	hrq1	YNR025C	YNR025C		0.84322	0.058	0.93723	0.044	-0.08906	0.058	9e-05
hrq1	hrq1	YMR158C-A	YMR158C-A		0.94231	0.173	1.03179	0.063	-0.08902	0.173	0.00165
hrq1	hrq1	YJL049W	YJL049W		0.88348	0.102	0.97186	0.054	-0.08898	0.102	0.00042
hrq1	hrq1	YPL032C	SVL3		0.9571	0.059	1.04134	0.009	-0.08848	0.058	6e-05
hrq1	hrq1	YOR104W	PIN2		0.88984	0.062	0.99037	0.038	-0.08842	0.062	9e-05
hrq1	hrq1	YFL041W	FET5		0.97914	0.025	1.06684	0	-0.08837	0.025	0.00022	status=JK
hrq1	hrq1	YGL255W	ZRT1		0.84847	0.115	0.93498	0.043	-0.08832	0.114	0.00067
hrq1	hrq1	YBR145W	ADH5		0.97362	0.063	1.06068	0.003	-0.08815	0.063	8e-05
hrq1	hrq1	YER166W	DNF1		0.94068	0.029	1.02539	0.036	-0.08807	0.029	0.00031	status=JK
hrq1	hrq1	YGR202C	PCT1		0.95409	0.13	1.04463	0.024	-0.08802	0.13	0.00069
hrq1	hrq1	YMR307W	GAS1		0.93248	0.031	1.01892	0.024	-0.08762	0.031	1e-05
hrq1	hrq1	YKR029C	SET3		0.90751	0.011	0.99958	0.033	-0.08712	0.011	5e-05	status=JK
hrq1	hrq1	YLR169W	YLR169W		0.97395	0.061	1.04596	0.036	-0.08697	0.06	7e-05
hrq1	hrq1	YBR189W	RPS9B		0.149	0.057	0.21648	0.118	-0.08692	0.057	0.01373
hrq1	hrq1	YJL160C	YJL160C		0.97199	0.016	1.061	0.016	-0.08651	0.016	9e-05	status=JK
hrq1	hrq1	YOR238W	YOR238W		0.97731	0.132	1.06891	0.016	-0.0865	0.132	0.00066
hrq1	hrq1	YKL096W	CWP1		0.93276	0.052	1.02169	0.037	-0.0861	0.051	0.00102	status=JK
hrq1	hrq1	YMR129W	POM152		0.99256	0.04	1.08224	0.024	-0.08599	0.04	0.00055	status=JK
hrq1	hrq1	YGR010W	NMA2		0.96574	0.025	1.05415	0.049	-0.08567	0.024	0.00021	status=JK
hrq1	hrq1	YLR121C	YPS3		0.91774	0.041	1.00686	0.023	-0.0856	0.041	2e-05
hrq1	hrq1	YIL076W	SEC28		0.89065	0.004	0.97648	0.033	-0.08551	0.004	1e-05	status=JK
hrq1	hrq1	YKL066W	YKL066W		0.94963	0.028	1.0282	0.05	-0.08523	0.028	0.0003	status=JK
hrq1	hrq1	YJL188C	YJL188C		0.91797	0.218	0.97502	0.088	-0.08511	0.218	0.00351
hrq1	hrq1	YPL004C	LSP1		0.92534	0.111	1.00611	0.032	-0.08507	0.111	0.00047
hrq1	hrq1	YBR018C	GAL7		0.91839	0.091	0.99948	0.031	-0.08475	0.091	0.00026
hrq1	hrq1	YGL023C	PIB2		0.91441	0.083	0.99476	0.038	-0.08465	0.083	0.00021
hrq1	hrq1	YLR189C	ATG26		0.94858	0.094	1.03859	0.048	-0.08459	0.094	0.00027
hrq1	hrq1	YOL054W	PSH1		0.92393	0.126	1.0146	0.044	-0.08456	0.125	0.00068
hrq1	hrq1	YPL136W	YPL136W		0.94218	0.043	1.02674	0.027	-0.08449	0.043	3e-05
hrq1	hrq1	YFL034W	YFL034W		0.93594	0.097	1.01626	0.031	-0.0841	0.097	0.00031
hrq1	hrq1	YLL029W	FRA1		0.87499	0.126	0.97016	0.07	-0.0839	0.126	0.0008
hrq1	hrq1	YOR230W	WTM1		0.96015	0.01	1.04551	0.014	-0.08385	0.01	4e-05	status=JK
hrq1	hrq1	YOR107W	RGS2		0.9821	0.183	1.06897	0.004	-0.08379	0.183	0.00173
hrq1	hrq1	YOR182C	RPS30B		0.64151	0.018	0.71777	0.046	-0.08378	0.018	0.00026	status=JK
hrq1	hrq1	YGR266W	YGR266W		0.97844	0.054	1.06317	0.042	-0.0835	0.054	5e-05
hrq1	hrq1	YNL001W	DOM34		0.87629	0.023	0.96188	0.004	-0.08318	0.023	1e-05
hrq1	hrq1	YGL151W	NUT1		0.90685	0.081	0.985	0.029	-0.08272	0.08	0.00019
hrq1	hrq1	YER113C	TMN3		1.01193	0.049	1.0863	0.033	-0.08269	0.049	3e-05
hrq1	hrq1	YKL062W	MSN4		0.88429	0.243	0.95764	0.063	-0.08265	0.243	0.00538
hrq1	hrq1	YOR078W	BUD21		0.38445	0.125	0.43787	0.142	-0.08259	0.125	0.00865
hrq1	hrq1	YGR131W	FHN1		0.96604	0.062	1.04747	0.014	-0.08258	0.062	7e-05
hrq1	hrq1	YOR304W	ISW2		0.96436	0.14	1.05115	0.011	-0.08243	0.14	0.00083
hrq1	hrq1	YLR151C	PCD1		0.94257	0.017	1.02887	0.011	-0.08236	0.017	0.0001	status=JK
hrq1	hrq1	YFR033C	QCR6		0.9363	0.02	1.01508	0.025	-0.08215	0.02	0.00015	status=JK
hrq1	hrq1	YPR052C	NHP6A		0.92032	0.048	1.0018	0.039	-0.08212	0.048	4e-05
hrq1	hrq1	YOL031C	SIL1		0.97093	0.009	1.05548	0.01	-0.082	0.009	3e-05	status=JK
hrq1	hrq1	YER161C	SPT2		0.85582	0.032	0.94391	0.039	-0.08198	0.032	1e-05
hrq1	hrq1	YBL088C	TEL1		0.92608	0.051	0.99614	0.036	-0.08198	0.051	5e-05
hrq1	hrq1	YJR026W	YJR026W		0.94371	0.097	1.02216	0.014	-0.08185	0.097	0.00029
hrq1	hrq1	YBR180W	DTR1		0.94982	0.013	1.02904	0.031	-0.0817	0.013	7e-05	status=JK
hrq1	hrq1	YDR097C	MSH6		0.96874	0.107	1.04831	0.003	-0.08168	0.107	0.00036
hrq1	hrq1	YLR248W	RCK2		0.94008	0.13	1.01187	0.047	-0.08143	0.129	0.00071
hrq1	hrq1	YLL044W	YLL044W		0.14291	0.017	0.25474	0.098	-0.08135	0.017	0.00473	status=JK
hrq1	hrq1	YHR029C	YHI9		0.93082	0.197	1.01248	0.033	-0.08126	0.197	0.00251
hrq1	hrq1	YGR197C	SNG1		0.92831	0.115	1.00372	0.028	-0.08117	0.115	0.00052
hrq1	hrq1	YBR220C	YBR220C		0.94949	0.066	1.03579	0.044	-0.08096	0.066	9e-05
hrq1	hrq1	YDR130C	FIN1		1.00194	0.037	1.0799	0.023	-0.08094	0.037	1e-05
hrq1	hrq1	YML100W	TSL1		0.94943	0.108	1.0277	0.014	-0.08092	0.108	0.0004
hrq1	hrq1	YML020W	YML020W		0.93201	0.023	1.00849	0.023	-0.08078	0.023	0
hrq1	hrq1	YGR196C	FYV8		0.93931	0.121	1.01568	0.061	-0.08074	0.12	0.00057
hrq1	hrq1	YBR103W	SIF2		0.85264	0.028	0.9329	0.026	-0.08072	0.028	1e-05
hrq1	hrq1	YMR303C	ADH2		0.97895	0.028	1.0513	0.058	-0.08071	0.028	0.00028	status=JK
hrq1	hrq1	YIR016W	YIR016W		0.91864	0.02	0.99254	0.044	-0.08068	0.019	0.00015	status=JK
hrq1	hrq1	YMR210W	YMR210W		0.95933	0.048	1.04303	0.007	-0.08061	0.048	3e-05
hrq1	hrq1	YPR040W	TIP41		0.92526	0.008	1.00546	0.028	-0.08027	0.008	3e-05	status=JK
hrq1	hrq1	YIL032C	YIL032C		0.90903	0.054	0.98265	0.057	-0.08027	0.054	6e-05
hrq1	hrq1	YPR006C	ICL2		0.91297	0.028	0.99814	0.033	-0.08021	0.028	0.0003	status=JK
hrq1	hrq1	YOR313C	SPS4		0.60048	0.084	0.6805	0.001	-0.08015	0.084	0.00074
hrq1	hrq1	YJL101C	GSH1		0.88631	0.104	0.80445	0.01	0.08012	0.104	0.00044
hrq1	hrq1	YLR421C	RPN13		1.0505	0.092	0.97592	0.026	0.08031	0.092	0.00019
hrq1	hrq1	YKL006W	RPL14A		0.81006	0.099	0.73561	0.033	0.08038	0.099	0.00049
hrq1	hrq1	YOR170W	YOR170W		1.08793	0.062	1.01571	0.053	0.08064	0.062	5e-05
hrq1	hrq1	YJR078W	BNA2		1.09287	0.022	1.00545	0.038	0.0807	0.022	0
hrq1	hrq1	YLR414C	PUN1		1.01476	0.053	0.94915	0.052	0.08076	0.053	4e-05
hrq1	hrq1	YBR085W	AAC3		1.05132	0.054	0.9747	0.034	0.08091	0.054	4e-05
hrq1	hrq1	YPL041C	YPL041C		1.10343	0.018	1.0214	0.031	0.08108	0.018	8e-05	status=JK
hrq1	hrq1	YPL200W	CSM4		1.08086	0.021	1.00161	0.021	0.08122	0.021	0.00013	status=JK
hrq1	hrq1	YPL256C	CLN2		1.10632	0.033	1.02127	0.024	0.08126	0.033	1e-05
hrq1	hrq1	YNL046W	YNL046W		0.40554	0.23	0.30828	0.089	0.08133	0.23	0.0387
hrq1	hrq1	YMR114C	YMR114C		1.11323	0.105	1.02886	0.009	0.08146	0.105	0.00023
hrq1	hrq1	YBR064W	YBR064W		1.08687	0.016	1.0017	0.036	0.08148	0.016	0
hrq1	hrq1	YIL030C	SSM4		1.05333	0.044	0.97223	0.03	0.08155	0.044	2e-05
hrq1	hrq1	YKL146W	AVT3		1.10576	0.036	1.02402	0.011	0.08163	0.036	1e-05
hrq1	hrq1	YDL215C	GDH2		0.98117	0.013	0.89961	0.003	0.082	0.013	0
hrq1	hrq1	YCR073W-A	SOL2		1.10129	0.007	1.01807	0.004	0.08205	0.007	1e-05	status=JK
hrq1	hrq1	YNL096C	RPS7B		1.02103	0.024	0.93387	0.016	0.08212	0.024	0
hrq1	hrq1	YKL216W	URA1		0.47579	0.052	0.38919	0.008	0.08214	0.052	0.00036
hrq1	hrq1	YFL044C	OTU1		1.09371	0.051	1.01356	0.006	0.08215	0.051	3e-05
hrq1	hrq1	YGL168W	HUR1		0.72777	0.058	0.64332	0.04	0.08219	0.058	0.00014
hrq1	hrq1	YNL145W	MFA2		1.12835	0.056	1.03326	0.076	0.08221	0.056	3e-05
hrq1	hrq1	YJL073W	JEM1		1.11544	0.027	1.02125	0.048	0.08227	0.027	0
hrq1	hrq1	YPL135W	ISU1		1.03905	0.062	0.95402	0.021	0.08238	0.062	6e-05
hrq1	hrq1	YDR492W	IZH1		1.10275	0.087	1.02512	0.025	0.08238	0.087	0.00013
hrq1	hrq1	YLR460C	YLR460C		1.1278	0.044	1.04341	0.012	0.08254	0.044	2e-05
hrq1	hrq1	YIL010W	DOT5		1.06827	0.052	0.98766	0.029	0.08257	0.052	3e-05
hrq1	hrq1	YMR025W	CSI1		1.13243	0.037	1.04547	0.025	0.08291	0.037	1e-05
hrq1	hrq1	YJR054W	KCH1		0.36828	0.159	0.26072	0.083	0.08293	0.159	0.01897
hrq1	hrq1	YAL031C	GIP4		1.04925	0.109	0.98263	0.051	0.08315	0.109	0.00031
hrq1	hrq1	YIL050W	PCL7		1.02551	0.097	0.94341	0.044	0.0832	0.097	0.00023
hrq1	hrq1	YML111W	BUL2		1.14193	0.003	1.05654	0.003	0.08321	0.003	0	status=JK
hrq1	hrq1	YDL134C	PPH21		1.04097	0.003	0.95714	0.001	0.08336	0.003	0	status=JK
hrq1	hrq1	YPL037C	EGD1		1.04221	0.048	0.96906	0.018	0.08361	0.048	3e-05
hrq1	hrq1	YHR206W	SKN7		1.04689	0.023	0.9543	0.026	0.08385	0.023	0.00016	status=JK
hrq1	hrq1	YLR080W	EMP46		1.11948	0.064	1.03476	0.02	0.08393	0.064	5e-05
hrq1	hrq1	YGR268C	HUA1		1.18196	0.025	1.10776	0.045	0.08397	0.025	0.00015	status=JK
hrq1	hrq1	YBL051C	PIN4		1.00196	0.057	0.92211	0.031	0.08407	0.057	5e-05
hrq1	hrq1	YGR289C	MAL11		1.12221	0.014	1.0497	0.032	0.08419	0.014	5e-05	status=JK
hrq1	hrq1	YOL062C	APM4		1.02579	0.068	0.95382	0.068	0.08432	0.068	8e-05
hrq1	hrq1	YPR179C	HDA3		0.95193	0.041	0.86583	0.027	0.08436	0.041	2e-05
hrq1	hrq1	YJL191W	RPS14B		1.08868	0.009	1.00619	0.014	0.08449	0.009	2e-05	status=JK
hrq1	hrq1	YGR226C	YGR226C		1.06881	0.083	0.9771	0.047	0.0845	0.083	0.00013
hrq1	hrq1	YJR147W	HMS2		1.06751	0.084	0.97358	0.026	0.08452	0.084	0.00014
hrq1	hrq1	YGR235C	MOS2		1.08889	0.079	1.00702	0.008	0.08453	0.079	0.0001
hrq1	hrq1	YOR246C	ENV9		1.11576	0.046	1.03409	0.009	0.08459	0.046	2e-05
hrq1	hrq1	YDL243C	AAD4		1.07506	0.087	0.97321	0.079	0.08466	0.087	0.00014
hrq1	hrq1	YLR368W	MDM30		1.11523	0.066	1.02738	0.008	0.08483	0.066	6e-05
hrq1	hrq1	YBL025W	RRN10		0.18595	0.054	0.10143	0.005	0.08491	0.054	0.00639
hrq1	hrq1	YLR234W	TOP3		0.90266	0.06	0.82315	0.06	0.08494	0.06	0.00147	status=JK
hrq1	hrq1	YGL262W	YGL262W		1.06487	0.099	0.98341	0.053	0.08496	0.099	0.00022
hrq1	hrq1	YHR195W	NVJ1		1.09598	0.056	1.00814	0.019	0.0851	0.056	4e-05
hrq1	hrq1	YIL138C	TPM2		1.05841	0.014	0.97692	0.008	0.08515	0.014	6e-05	status=JK
hrq1	hrq1	YGL211W	NCS6		0.96358	0.054	0.87757	0.028	0.08529	0.054	5e-05
hrq1	hrq1	YOR171C	LCB4		1.08773	0.012	1.00369	0.02	0.08539	0.012	4e-05	status=JK
hrq1	hrq1	YMR120C	ADE17		1.09431	0.091	1.01454	0.045	0.08547	0.091	0.00016
hrq1	hrq1	YOR006C	TSR3		1.10632	0.104	1.01183	0.049	0.08549	0.104	0.00023
hrq1	hrq1	YPL026C	SKS1		1.06519	0.097	0.9803	0.029	0.08553	0.097	0.00021
hrq1	hrq1	YLR206W	ENT2		1.06539	0.055	0.97414	0.014	0.08564	0.055	4e-05
hrq1	hrq1	YLR343W	GAS2		1.12608	0.008	1.03839	0.017	0.08609	0.008	2e-05	status=JK
hrq1	hrq1	YER145C	FTR1		1.05013	0.064	0.96275	0.002	0.08614	0.064	6e-05
hrq1	hrq1	YER144C	UBP5		1.07875	0.01	0.99569	0.023	0.08626	0.01	3e-05	status=JK
hrq1	hrq1	YBR132C	AGP2		1.08914	0.014	1.02017	0.053	0.08636	0.014	5e-05	status=JK
hrq1	hrq1	YOL141W	PPM2		1.13646	0.15	1.02746	0.102	0.08652	0.15	0.00062
hrq1	hrq1	YMR052W	FAR3		1.13111	0.028	1.04297	0.041	0.08658	0.028	0
hrq1	hrq1	YDR155C	CPR1		1.074	0.053	0.99299	0.028	0.08674	0.053	3e-05
hrq1	hrq1	YGR148C	RPL24B		0.96653	0.011	0.88308	0.027	0.08679	0.011	4e-05	status=JK
hrq1	hrq1	YPL079W	RPL21B		1.00213	0.071	0.91697	0.003	0.08699	0.071	0.0001
hrq1	hrq1	YLR434C	YLR434C		1.0987	0.043	1.01069	0.027	0.087	0.043	2e-05
hrq1	hrq1	YLR446W	YLR446W		1.1006	0.037	1.00795	0.009	0.08703	0.037	1e-05
hrq1	hrq1	YIL135C	VHS2		1.11536	0.038	1.02793	0.043	0.08706	0.038	1e-05
hrq1	hrq1	YGL059W	PKP2		0.91273	0.017	0.80564	0.151	0.08712	0.017	0.00011	status=JK
hrq1	hrq1	YJL117W	PHO86		0.99297	0.076	0.90855	0.045	0.08736	0.076	0.00012
hrq1	hrq1	YBR122C	MRPL36		1.11005	0.045	1.01527	0.014	0.0874	0.045	2e-05
hrq1	hrq1	YHL046C	PAU13		1.12135	0.063	1.02781	0.026	0.08787	0.063	5e-05
hrq1	hrq1	YLR128W	DCN1		1.13029	0.056	1.04056	0.022	0.08789	0.055	3e-05
hrq1	hrq1	YPL253C	VIK1		1.10089	0.029	1.01372	0.006	0.08797	0.029	0
hrq1	hrq1	YNR009W	NRM1		1.05216	0.106	0.96786	0.026	0.08832	0.106	0.00028
hrq1	hrq1	YKR100C	SKG1		1.11374	0.143	1.02656	0.027	0.08834	0.143	0.00058
hrq1	hrq1	YIR003W	AIM21		1.06437	0.048	0.98033	0.057	0.08848	0.048	2e-05
hrq1	hrq1	YMR040W	YET2		1.07167	0.115	0.97898	0.008	0.08872	0.115	0.00034
hrq1	hrq1	YOR275C	RIM20		0.99205	0.057	0.90236	0.031	0.0889	0.057	5e-05
hrq1	hrq1	YJL171C	YJL171C		1.12324	0.033	1.03602	0.007	0.08906	0.033	1e-05
hrq1	hrq1	YHR126C	ANS1		1.08201	0.079	0.992	0.009	0.0895	0.079	0.00011
hrq1	hrq1	YIL060W	YIL060W		1.07936	0.038	0.99676	0.028	0.08965	0.038	1e-05
hrq1	hrq1	YNR064C	YNR064C		1.06988	0.21	0.98188	0.02	0.08979	0.21	0.00201
hrq1	hrq1	YNR072W	HXT17		1.08619	0.043	0.98821	0.046	0.08981	0.043	2e-05
hrq1	hrq1	YBL024W	NCL1		1.0993	0.009	1.00584	0.034	0.08996	0.009	2e-05	status=JK
hrq1	hrq1	YKL127W	PGM1		1.07273	0.041	0.9806	0.018	0.09011	0.041	2e-05
hrq1	hrq1	YPR119W	CLB2		1.08602	0.05	0.9863	0.068	0.09022	0.05	3e-05
hrq1	hrq1	YML067C	ERV41		1.09958	0.113	1.00352	0.052	0.0903	0.113	0.0003
hrq1	hrq1	YMR052C-A	YMR052C-A		1.07018	0.053	0.9791	0.024	0.09031	0.053	3e-05
hrq1	hrq1	YLR271W	YLR271W		1.09761	0.053	1.01532	0.031	0.09039	0.053	3e-05
hrq1	hrq1	YMR230W	RPS10B		0.91756	0.125	0.8278	0.006	0.09054	0.125	0.00068
hrq1	hrq1	YHR189W	PTH1		1.02027	0.052	0.92548	0.02	0.09055	0.052	4e-05
hrq1	hrq1	YPL214C	THI6		1.07705	0.034	0.98756	0.032	0.0906	0.034	0.00034	status=JK
hrq1	hrq1	YOL046C	YOL046C		1.06542	0.071	0.9747	0.022	0.09061	0.071	8e-05
hrq1	hrq1	YHL014C	YLF2		1.08474	0.114	1.00125	0.039	0.09074	0.114	0.00032
hrq1	hrq1	YDL130W	RPP1B		1.02664	0.006	0.93903	0.027	0.09083	0.006	1e-05	status=JK
hrq1	hrq1	YBR119W	MUD1		0.9981	0.008	0.92453	0.095	0.09084	0.008	2e-05	status=JK
hrq1	hrq1	YHL030W	ECM29		1.10631	0.014	1.032	0.063	0.09086	0.014	5e-05	status=JK
hrq1	hrq1	YNL067W	RPL9B		1.03724	0.095	0.9484	0.024	0.09109	0.094	0.00021
hrq1	hrq1	YLR200W	YKE2		1.06786	0.141	0.9849	0.064	0.0911	0.141	0.00062
hrq1	hrq1	YKR059W	TIF1		0.93461	0.071	0.83797	0.012	0.09116	0.071	0.00012
hrq1	hrq1	YPL053C	KTR6		1.08794	0.105	1.00031	0.015	0.09124	0.105	0.00025
hrq1	hrq1	YML060W	OGG1		1.07437	0.074	0.9762	0.023	0.09139	0.074	9e-05
hrq1	hrq1	YMR297W	PRC1		1.12869	0.057	1.04517	0.07	0.09149	0.056	3e-05
hrq1	hrq1	YLR171W	YLR171W		1.09255	0.033	1.00337	0.014	0.09149	0.033	0.0003	status=JK
hrq1	hrq1	YML057W	CMP2		1.10098	0.032	1.00713	0.048	0.0916	0.032	1e-05
hrq1	hrq1	YHL023C	NPR3		0.98328	0.002	0.89168	0.014	0.09185	0.002	0	status=JK
hrq1	hrq1	YJL211C	YJL211C		1.02501	0.089	0.932	0.009	0.09191	0.089	0.00018
hrq1	hrq1	YNL049C	SFB2		1.1362	0.016	1.04379	0.003	0.09224	0.016	7e-05	status=JK
hrq1	hrq1	YOR090C	PTC5		1.10047	0.037	0.98942	0.06	0.09237	0.037	1e-05
hrq1	hrq1	YHR180W	YHR180W		0.7693	0.158	0.66129	0.081	0.09237	0.158	0.00232
hrq1	hrq1	YPL137C	GIP3		1.131	0.069	1.02898	0.068	0.09249	0.069	6e-05
hrq1	hrq1	YKR080W	MTD1		1.11584	0.098	1.02492	0.024	0.09289	0.098	0.00018
hrq1	hrq1	YBR086C	IST2		1.04706	0.055	0.95793	0.027	0.0929	0.055	4e-05
hrq1	hrq1	YMR111C	YMR111C		1.08624	0.081	0.99215	0.018	0.093	0.081	0.00011
hrq1	hrq1	YOL095C	HMI1		0.94378	0.018	0.85861	0.043	0.09314	0.018	0
hrq1	hrq1	YDR076W	RAD55		1.02426	0.021	0.92649	0.008	0.0932	0.021	0.00014	status=JK
hrq1	hrq1	YGR173W	RBG2		0.83108	0.07	0.73946	0.038	0.09359	0.069	0.00016
hrq1	hrq1	YJR066W	TOR1		1.08267	0.04	0.98928	0.014	0.09359	0.039	1e-05
hrq1	hrq1	YDL200C	MGT1		1.05543	0.093	0.96152	0.001	0.09365	0.093	0.00019
hrq1	hrq1	YLR191W	PEX13		1.04598	0.052	0.94757	0.023	0.09381	0.052	3e-05
hrq1	hrq1	YNR029C	YNR029C		1.03362	0.046	0.9436	0.009	0.094	0.046	2e-05
hrq1	hrq1	YKL053W	YKL053W		1.0814	0.059	0.98601	0.032	0.09435	0.059	4e-05
hrq1	hrq1	YML038C	YMD8		0.85516	0.052	0.76128	0.009	0.09456	0.052	6e-05
hrq1	hrq1	YGR169C	PUS6		1.11377	0.068	1.02084	0.023	0.09458	0.068	6e-05
hrq1	hrq1	YOR242C	SSP2		1.09975	0.032	1.0125	0.047	0.09471	0.032	1e-05
hrq1	hrq1	YGR014W	MSB2		0.987	0.008	0.89539	0.02	0.09473	0.008	2e-05	status=JK
hrq1	hrq1	YJR135C	MCM22		1.11039	0.074	1.01793	0.015	0.09475	0.074	8e-05
hrq1	hrq1	YPR042C	PUF2		1.08851	0.005	0.9971	0.035	0.0949	0.005	1e-05	status=JK
hrq1	hrq1	YPR069C	SPE3		0.89957	0.033	0.8012	0.024	0.09503	0.033	1e-05
hrq1	hrq1	YOL137W	BSC6		1.0804	0.08	0.98644	0.041	0.0952	0.08	0.00011
hrq1	hrq1	YKL197C	PEX1		1.02376	0.103	0.92814	0.014	0.09529	0.103	0.00028
hrq1	hrq1	YGL210W	YPT32		1.02517	0.08	0.93233	0.018	0.0954	0.08	0.00013
hrq1	hrq1	YMR054W	STV1		1.06967	0.013	0.98444	0.047	0.09544	0.013	5e-05	status=JK
hrq1	hrq1	YOR052C	YOR052C		1.10939	0.03	1.01268	0.047	0.09568	0.03	1e-05
hrq1	hrq1	YPR026W	ATH1		1.12207	0.066	1.02521	0.005	0.09573	0.066	5e-05
hrq1	hrq1	YHR066W	SSF1		0.91235	0.111	0.81515	0.018	0.09578	0.111	0.00049
hrq1	hrq1	YBR059C	AKL1		1.01667	0.023	0.92145	0.003	0.09586	0.023	0
hrq1	hrq1	YOR085W	OST3		0.93197	0.105	0.83919	0.032	0.09607	0.105	0.00039
hrq1	hrq1	YDL190C	UFD2		1.0743	0.023	0.98959	0.059	0.09608	0.023	0
hrq1	hrq1	YKR041W	YKR041W		1.10952	0.075	1.01105	0.03	0.09614	0.075	8e-05
hrq1	hrq1	YOL028C	YAP7		1.13371	0.074	1.0451	0.049	0.09618	0.074	8e-05
hrq1	hrq1	YLR018C	POM34		1.09247	0.05	1.00436	0.039	0.0963	0.05	3e-05
hrq1	hrq1	YKR039W	GAP1		1.12829	0.089	1.0319	0.004	0.09631	0.088	0.00013
hrq1	hrq1	YOL008W	COQ10		1.00349	0.074	0.91024	0.008	0.09661	0.074	0.00011
hrq1	hrq1	YDR541C	YDR541C		1.02452	0.023	0.92521	0.032	0.09727	0.023	0.00017	status=JK
hrq1	hrq1	YMR226C	YMR226C		1.10128	0.039	1.00233	0.044	0.09763	0.039	1e-05
hrq1	hrq1	YLR351C	NIT3		1.11689	0.147	1.02321	0.027	0.09768	0.147	0.00061
hrq1	hrq1	YGL170C	SPO74		0.95693	0.037	0.84027	0.112	0.098	0.037	0.0005	status=JK
hrq1	hrq1	YGL197W	MDS3		1.10924	0.01	1.00589	0.011	0.09809	0.01	3e-05	status=JK
hrq1	hrq1	YPR149W	NCE102		1.07578	0.04	0.97431	0.003	0.09815	0.04	1e-05
hrq1	hrq1	YBR240C	THI2		1.08973	0.017	0.99579	0.032	0.09815	0.017	8e-05	status=JK
hrq1	hrq1	YER093C-A	AIM11		1.01394	0.023	0.91478	0.027	0.09839	0.023	0.00017	status=JK
hrq1	hrq1	YMR107W	SPG4		1.12168	0.044	1.02161	0.03	0.09894	0.044	2e-05
hrq1	hrq1	YNR049C	MSO1		1.06402	0.098	0.96412	0.005	0.09909	0.098	0.00021
hrq1	hrq1	YJR126C	VPS70		1.01827	0.085	0.91696	0.034	0.0996	0.085	0.00016
hrq1	hrq1	YNL094W	APP1		1.08578	0.147	0.99649	0.036	0.09974	0.147	0.00067
hrq1	hrq1	YOR136W	IDH2		0.86277	0.085	0.75991	0.022	0.09991	0.085	0.00026
hrq1	hrq1	YPL207W	TYW1		1.09002	0.053	0.97808	0.116	0.09995	0.053	3e-05
hrq1	hrq1	YNL030W	HHF2		1.08104	0.04	0.98416	0.03	0.10003	0.04	1e-05
hrq1	hrq1	YJR148W	BAT2		1.10047	0.015	0.99385	0.033	0.10032	0.015	6e-05	status=JK
hrq1	hrq1	YOL052C	SPE2		0.85147	0.017	0.75348	0.004	0.10037	0.017	0
hrq1	hrq1	YDL062W	YDL062W		1.04217	0.095	0.94542	0.015	0.10047	0.095	0.00021
hrq1	hrq1	YMR295C	YMR295C		1.17073	0.014	1.07292	0.017	0.10072	0.014	5e-05	status=JK
hrq1	hrq1	YOR311C	DGK1		1.03239	0.018	0.93863	0.051	0.10092	0.018	0.0001	status=JK
hrq1	hrq1	YDR072C	IPT1		1.06791	0.108	0.9687	0.062	0.10113	0.108	0.00028
hrq1	hrq1	YPR020W	ATP20		0.97335	0.019	0.87489	0.039	0.10114	0.019	0
hrq1	hrq1	YGL214W	YGL214W		0.32335	0.038	0.22852	0.045	0.10117	0.038	0.00462	status=JK
hrq1	hrq1	YML101C	CUE4		1.14139	0.061	1.0326	0.024	0.10146	0.06	4e-05
hrq1	hrq1	YMR119W	ASI1		1.10306	0.024	0.99957	0.029	0.10196	0.024	0.00016	status=JK
hrq1	hrq1	YDR494W	RSM28		1.14938	0.078	1.04004	0.034	0.10198	0.078	9e-05
hrq1	hrq1	YCR031C	RPS14A		0.9359	0.058	0.83979	0.027	0.10213	0.058	7e-05
hrq1	hrq1	YDL082W	RPL13A		0.6936	0.244	0.62245	0.145	0.10218	0.244	0.01078
hrq1	hrq1	YHR006W	STP2		1.06991	0.116	0.95533	0.056	0.10256	0.116	0.00035
hrq1	hrq1	YCR105W	ADH7		0.79362	0.078	0.69087	0.01	0.10262	0.078	0.00026
hrq1	hrq1	YML109W	ZDS2		1.07282	0.07	0.97053	0.038	0.10271	0.07	8e-05
hrq1	hrq1	YLR003C	CMS1		1.12427	0.017	1.02617	0.029	0.10272	0.017	8e-05	status=JK
hrq1	hrq1	YKL163W	PIR3		1.12365	0.036	1.01462	0.022	0.10273	0.036	0.00035	status=JK
hrq1	hrq1	YNL146W	YNL146W		1.14192	0.068	1.0429	0.034	0.10282	0.068	6e-05
hrq1	hrq1	YLR384C	IKI3		0.99644	0.031	0.89571	0.011	0.10287	0.031	1e-05
hrq1	hrq1	YGL133W	ITC1		0.99653	0.011	0.89206	0.01	0.10299	0.011	0
hrq1	hrq1	YOL080C	REX4		1.07871	0.009	0.98491	0.056	0.10322	0.009	2e-05	status=JK
hrq1	hrq1	YIR033W	MGA2		1.02399	0.029	0.92274	0.02	0.10325	0.029	1e-05
hrq1	hrq1	YNL154C	YCK2		1.05416	0.03	0.94899	0.032	0.10332	0.03	1e-05
hrq1	hrq1	YMR122C	YMR122C		1.10961	0.06	1.00445	0.005	0.1035	0.06	4e-05
hrq1	hrq1	YMR078C	CTF18		0.88403	0.05	0.78374	0.032	0.10355	0.05	5e-05
hrq1	hrq1	YGR101W	PCP1		0.87866	0.013	0.77184	0.016	0.10376	0.013	0
hrq1	hrq1	YKL109W	HAP4		1.06436	0.045	0.96284	0.007	0.1039	0.045	2e-05
hrq1	hrq1	YDR388W	RVS167		0.84777	0.042	0.72524	0.066	0.10405	0.042	0.0008	status=JK
hrq1	hrq1	YNL076W	MKS1		0.82505	0.05	0.72134	0.005	0.10454	0.05	6e-05
hrq1	hrq1	YGR089W	NNF2		1.11713	0.025	1.01515	0.033	0.10497	0.025	0
hrq1	hrq1	YBR061C	TRM7		0.97026	0.188	0.85202	0.093	0.10516	0.188	0.00195
hrq1	hrq1	YML124C	TUB3		1.11727	0.035	1.01846	0.025	0.10536	0.035	1e-05
hrq1	hrq1	YBL087C	RPL23A		0.93554	0.104	0.8263	0.036	0.10546	0.104	0.00038
hrq1	hrq1	YGL163C	RAD54		0.93878	0.092	0.80779	0.096	0.10577	0.092	0.00026
hrq1	hrq1	YML005W	TRM12		1.12041	0.043	1.02343	0.019	0.10584	0.043	2e-05
hrq1	hrq1	YGL016W	KAP122		1.05073	0.024	0.94527	0.011	0.10598	0.024	0.00018	status=JK
hrq1	hrq1	YMR223W	UBP8		1.06765	0.037	0.95982	0.037	0.10658	0.037	1e-05
hrq1	hrq1	YDR471W	RPL27B		0.97126	0.043	0.86422	0.029	0.1067	0.043	2e-05
hrq1	hrq1	YMR221C	YMR221C		1.14808	0.071	1.03335	0.031	0.10671	0.071	7e-05
hrq1	hrq1	YNR040W	YNR040W		1.09948	0.04	0.99529	0.029	0.10684	0.04	1e-05
hrq1	hrq1	YKR047W	YKR047W		1.08229	0.041	0.99229	0.059	0.10692	0.041	2e-05
hrq1	hrq1	YHL012W	YHL012W		1.10017	0.041	0.99117	0.006	0.10733	0.041	1e-05
hrq1	hrq1	YNL041C	COG6		1.07268	0.064	0.96682	0.037	0.10751	0.064	6e-05
hrq1	hrq1	YMR105C	PGM2		1.10248	0.046	0.99686	0.015	0.10762	0.046	2e-05
hrq1	hrq1	YKR064W	OAF3		1.06557	0.056	0.9565	0.019	0.10788	0.056	4e-05
hrq1	hrq1	YML030W	RCF1		1.0736	0.038	0.96947	0.043	0.10804	0.038	1e-05
hrq1	hrq1	YER174C	GRX4		1.12122	0.016	1.01239	0.024	0.10826	0.016	7e-05	status=JK
hrq1	hrq1	YLR188W	MDL1		1.05526	0.073	0.9425	0.014	0.1084	0.072	9e-05
hrq1	hrq1	YPL205C	YPL205C		0.97028	0.046	0.86391	0.007	0.10841	0.046	3e-05
hrq1	hrq1	YMR124W	YMR124W		1.1586	0.038	1.04206	0.029	0.10857	0.038	1e-05
hrq1	hrq1	YMR238W	DFG5		1.09863	0.038	0.98952	0.054	0.10871	0.038	1e-05
hrq1	hrq1	YBL103C	RTG3		0.80027	0.011	0.69133	0.005	0.10877	0.011	7e-05	status=JK
hrq1	hrq1	YER085C	YER085C		1.1021	0.06	1.00202	0.018	0.10892	0.06	5e-05
hrq1	hrq1	YLR370C	ARC18		1.0598	0.032	0.95096	0.043	0.10913	0.032	1e-05
hrq1	hrq1	YLR393W	ATP10		1.00176	0.017	0.8935	0.019	0.10917	0.017	0.0001	status=JK
hrq1	hrq1	YMR015C	ERG5		1.0609	0.013	0.94632	0.013	0.10927	0.013	5e-05	status=JK
hrq1	hrq1	YIL134W	FLX1		0.90844	0.008	0.80068	0.009	0.11	0.008	3e-05	status=JK
hrq1	hrq1	YOR002W	ALG6		1.05487	0.072	0.95171	0.026	0.11004	0.072	9e-05
hrq1	hrq1	YDR149C	YDR149C		0.98437	0.013	0.86888	0.011	0.11027	0.013	0
hrq1	hrq1	YMR119W-A	YMR119W-A		1.13166	0.071	1.02317	0.014	0.11072	0.071	7e-05
hrq1	hrq1	YJL089W	SIP4		1.0666	0.1	0.95939	0.019	0.11093	0.1	0.00023
hrq1	hrq1	YNR012W	URK1		1.14407	0.021	1.02475	0.029	0.11138	0.021	0.00011	status=JK
hrq1	hrq1	YNL020C	ARK1		1.09151	0.139	0.98661	0.031	0.11145	0.139	0.00056
hrq1	hrq1	YNL097C	PHO23		1.09924	0.052	0.98769	0.033	0.1116	0.052	0.00075	status=JK
hrq1	hrq1	YMR021C	MAC1		0.96514	0.056	0.86301	0.051	0.1118	0.056	5e-05
hrq1	hrq1	YDR497C	ITR1		1.19455	0.014	1.07914	0.028	0.11198	0.014	5e-05	status=JK
hrq1	hrq1	YFL021W	GAT1		1.17499	0.075	1.06303	0.022	0.11227	0.075	7e-05
hrq1	hrq1	YMR037C	MSN2		1.10307	0.177	0.9858	0.011	0.1123	0.177	0.00112
hrq1	hrq1	YIL064W	SEE1		1.08973	0.046	0.97419	0.027	0.11232	0.046	2e-05
hrq1	hrq1	YJL206C-A	YJL206C-A		0.75013	0.068	0.63941	0.052	0.11247	0.068	0.00021
hrq1	hrq1	YDL242W	YDL242W		1.11039	0.015	1.00032	0.008	0.11268	0.015	6e-05	status=JK
hrq1	hrq1	YKR024C	DBP7		0.98626	0.022	0.87249	0.008	0.11276	0.022	0.00016	status=JK
hrq1	hrq1	YNL122C	YNL122C		1.10522	0.028	0.99428	0.012	0.11332	0.028	0
hrq1	hrq1	YLR182W	SWI6		0.33822	0.146	0.23028	0.078	0.11339	0.146	0.019
hrq1	hrq1	YFR009W	GCN20		1.02969	0.063	0.9211	0.02	0.11342	0.063	6e-05
hrq1	hrq1	YPR096C	YPR096C		1.08137	0.063	0.96485	0.003	0.11352	0.063	5e-05
hrq1	hrq1	YBR267W	REI1		0.56614	0.043	0.451	0.072	0.11363	0.043	0.00012
hrq1	hrq1	YMR056C	AAC1		1.13934	0.044	1.02612	0.029	0.11417	0.044	2e-05
hrq1	hrq1	YJR117W	STE24		1.11431	0.043	0.99653	0.01	0.11422	0.042	0.00049	status=JK
hrq1	hrq1	YMR241W	YHM2		0.90649	0.022	0.78412	0.026	0.11424	0.022	0
hrq1	hrq1	YDL239C	ADY3		1.06196	0.094	0.93075	0.077	0.11447	0.094	0.00019
hrq1	hrq1	YMR294W-A	YMR294W-A		0.80409	0.036	0.68975	0.05	0.11458	0.036	2e-05
hrq1	hrq1	YLR219W	MSC3		1.06709	0.046	0.95622	0.048	0.11516	0.046	2e-05
hrq1	hrq1	YPL261C	YPL261C		0.99966	0.074	0.87921	0.024	0.1152	0.074	0.00183	status=JK
hrq1	hrq1	YOR043W	WHI2		1.11145	0.094	0.99702	0.001	0.11522	0.094	0.00017
hrq1	hrq1	YPL161C	BEM4		0.98576	0.086	0.87783	0.036	0.11578	0.086	0.00018
hrq1	hrq1	YJR100C	AIM25		1.12301	0.12	1.00038	0.034	0.11591	0.119	0.00033
hrq1	hrq1	YJL135W	YJL135W		1.11509	0.035	1.00433	0.049	0.11646	0.035	1e-05
hrq1	hrq1	YHR209W	CRG1		1.0776	0.02	0.96404	0.038	0.11685	0.02	0.00011	status=JK
hrq1	hrq1	YMR080C	NAM7		1.15216	0.109	1.03188	0.054	0.11735	0.109	0.00023
hrq1	hrq1	YBR016W	YBR016W		0.6348	0.071	0.52521	0.044	0.11743	0.071	0.00038
hrq1	hrq1	YNL044W	YIP3		1.11375	0.027	0.99768	0.004	0.11777	0.027	0.0002	status=JK
hrq1	hrq1	YDL104C	QRI7		1.09081	0.049	0.97459	0.006	0.11811	0.049	2e-05
hrq1	hrq1	YLR114C	AVL9		1.11106	0.035	0.99771	0.018	0.11814	0.035	0.00033	status=JK
hrq1	hrq1	YHR184W	SSP1		1.18173	0.045	1.06228	0.026	0.11848	0.045	2e-05
hrq1	hrq1	YMR086C-A	YMR086C-A		1.17193	0.314	1.03598	0.08	0.11848	0.314	0.00497
hrq1	hrq1	YOL105C	WSC3		1.13213	0.034	1.01365	0.019	0.11874	0.034	1e-05
hrq1	hrq1	YGL024W	YGL024W		0.53429	0.086	0.4151	0.026	0.11892	0.086	0.00114
hrq1	hrq1	YOR082C	YOR082C		1.03811	0.121	0.92959	0.107	0.11913	0.121	0.00043
hrq1	hrq1	YGL257C	MNT2		1.13193	0.102	1.00828	0.023	0.11918	0.102	0.0002
hrq1	hrq1	YNR041C	COQ2		1.05451	0.012	0.93042	0.068	0.11925	0.012	4e-05	status=JK
hrq1	hrq1	YGL226W	MTC3		1.08118	0.118	0.96211	0.01	0.11943	0.118	0.00035
hrq1	hrq1	YLR185W	RPL37A		0.79145	0.219	0.69124	0.119	0.12009	0.218	0.00543
hrq1	hrq1	YGR067C	YGR067C		1.20327	0.107	1.08734	0.059	0.12064	0.107	0.00019
hrq1	hrq1	YPL144W	POC4		0.93564	0.051	0.80271	0.092	0.12065	0.051	5e-05
hrq1	hrq1	YHL027W	RIM101		1.05688	0.063	0.92886	0.028	0.1207	0.063	6e-05
hrq1	hrq1	YNR004W	SWM2		1.03021	0.013	0.91656	0.096	0.12108	0.013	5e-05	status=JK
hrq1	hrq1	YMR060C	SAM37		1.11084	0.093	0.99182	0.021	0.1214	0.093	0.00016
hrq1	hrq1	YOL053W	AIM39		1.12853	0.116	1.01024	0.047	0.12156	0.115	0.00029
hrq1	hrq1	YLR082C	SRL2		1.16557	0.13	1.03244	0.04	0.12192	0.13	0.00038
hrq1	hrq1	YMR036C	MIH1		1.1553	0.024	1.03421	0.036	0.12277	0.024	0
hrq1	hrq1	YDL181W	INH1		1.06678	0.001	0.94734	0.022	0.12278	0.001	0	status=JK
hrq1	hrq1	YPL187W	MF(ALPHA)1		1.19157	0.029	1.06775	0.006	0.12281	0.029	0.0002	status=JK
hrq1	hrq1	YMR104C	YPK2		1.17613	0.123	1.04476	0.023	0.12325	0.123	0.00032
hrq1	hrq1	YLR193C	UPS1		0.87938	0.024	0.76006	0.017	0.12339	0.023	0.00024	status=JK
hrq1	hrq1	YMR318C	ADH6		1.10705	0.05	0.98206	0.005	0.12476	0.05	3e-05
hrq1	hrq1	YGR178C	PBP1		1.03946	0.201	0.92636	0.063	0.12488	0.201	0.00192
hrq1	hrq1	YMR011W	HXT2		0.82728	0.091	0.70615	0.02	0.1256	0.091	0.00037
hrq1	hrq1	YML081C-A	ATP18		1.02943	0.065	0.88245	0.066	0.12582	0.065	7e-05
hrq1	hrq1	YNL090W	RHO2		1.15298	0.023	1.02931	0.018	0.12601	0.023	0
hrq1	hrq1	YML108W	YML108W		1.13186	0.064	0.99495	0.05	0.1273	0.064	5e-05
hrq1	hrq1	YMR312W	ELP6		0.96696	0.041	0.8221	0.061	0.12747	0.041	2e-05
hrq1	hrq1	YBR084C-A	RPL19A		1.02013	0.029	0.89593	0.006	0.12776	0.029	1e-05
hrq1	hrq1	YPR118W	MRI1		1.11367	0.024	0.98129	0.019	0.1278	0.024	0.00015	status=JK
hrq1	hrq1	YDR092W	UBC13		1.13539	0.026	1.00713	0.037	0.1278	0.026	0
hrq1	hrq1	YGR187C	HGH1		1.11569	0.031	0.98343	0.032	0.12826	0.031	1e-05
hrq1	hrq1	YHR049C-A	YHR049C-A		1.11712	0.126	0.98202	0.044	0.12894	0.126	0.0004
hrq1	hrq1	YKR102W	FLO10		1.111	0.015	0.98034	0.007	0.12949	0.015	6e-05	status=JK
hrq1	hrq1	YJL177W	RPL17B		1.02435	0.049	0.88945	0.019	0.12997	0.049	0.00076	status=JK
hrq1	hrq1	YJL110C	GZF3		1.10137	0.166	0.97039	0.052	0.13076	0.165	0.00092
hrq1	hrq1	YDR004W	RAD57		1.08844	0.037	0.95436	0.01	0.13095	0.037	1e-05
hrq1	hrq1	YBR077C	SLM4		1.18503	0.077	1.04737	0.011	0.13136	0.077	8e-05
hrq1	hrq1	YER176W	ECM32		1.12546	0.042	0.99998	0.022	0.13144	0.042	1e-05
hrq1	hrq1	YNL144C	YNL144C		1.17506	0.148	1.04975	0.032	0.13179	0.147	0.00054
hrq1	hrq1	YGL167C	PMR1		0.87684	0.013	0.73758	0.032	0.13328	0.013	7e-05	status=JK
hrq1	hrq1	YLR361C	DCR2		1.11079	0.018	0.9697	0.05	0.13369	0.018	9e-05	status=JK
hrq1	hrq1	YMR264W	CUE1		1.1602	0.038	1.03386	0.043	0.13459	0.038	1e-05
hrq1	hrq1	YLR432W	IMD3		1.12081	0.01	0.98615	0.029	0.13631	0.01	3e-05	status=JK
hrq1	hrq1	YJL139C	YUR1		0.71704	0.367	0.57699	0.437	0.13728	0.366	0.02968
hrq1	hrq1	YPL239W	YAR1		0.76211	0.13	0.61912	0.043	0.13739	0.13	0.00134
hrq1	hrq1	YLR054C	OSW2		1.1513	0.052	1.01847	0.051	0.1379	0.052	3e-05
hrq1	hrq1	YNL011C	YNL011C		1.14751	0.051	1.00837	0.017	0.13808	0.051	2e-05
hrq1	hrq1	YNR020C	ATP23		0.95695	0.056	0.82037	0.035	0.13813	0.056	5e-05
hrq1	hrq1	YKL161C	KDX1		1.14476	0.019	1.00323	0.006	0.13962	0.019	9e-05	status=JK
hrq1	hrq1	YMR070W	MOT3		1.12844	0.083	0.99147	0.033	0.1409	0.083	0.00011
hrq1	hrq1	YDR057W	YOS9		1.02369	0.249	0.90096	0.181	0.14129	0.248	0.00374
hrq1	hrq1	YKL043W	PHD1		1.18546	0.074	1.03388	0.019	0.1413	0.074	7e-05
hrq1	hrq1	YPL178W	CBC2		0.29208	0.139	0.16768	0.072	0.14142	0.139	0.02456
hrq1	hrq1	YDL183C	YDL183C		1.05914	0.034	0.9192	0.042	0.14165	0.034	1e-05
hrq1	hrq1	YMR123W	PKR1		1.00698	0.037	0.86114	0.012	0.14167	0.037	0.00045	status=JK
hrq1	hrq1	YIL164C	NIT1		1.09402	0.015	0.94311	0.033	0.14304	0.015	7e-05	status=JK
hrq1	hrq1	YMR243C	ZRC1		0.92547	0.099	0.77666	0.022	0.14379	0.099	0.00034
hrq1	hrq1	YMR018W	YMR018W		1.16221	0.006	1.01534	0.028	0.14382	0.006	1e-05	status=JK
hrq1	hrq1	YOR012W	YOR012W		1.13372	0.005	0.99409	0.029	0.14395	0.005	1e-05	status=JK
hrq1	hrq1	YMR278W	PGM3		1.21144	0.083	1.06311	0.059	0.14399	0.083	9e-05
hrq1	hrq1	YOR128C	ADE2		1.01421	0.02	0.88065	0.1	0.14439	0.02	0.00013	status=JK
hrq1	hrq1	YDL238C	GUD1		1.10621	0.077	0.95815	0.018	0.14444	0.077	9e-05
hrq1	hrq1	YGL174W	BUD13		0.94801	0.066	0.80691	0.029	0.14492	0.066	9e-05
hrq1	hrq1	YML117W-A	YML117W-A		1.1707	0.06	1.02028	0.017	0.14573	0.06	4e-05
hrq1	hrq1	YML029W	USA1		1.16188	0.188	1.01488	0.033	0.14613	0.188	0.00114
hrq1	hrq1	YNL121C	TOM70		0.95117	0.211	0.75921	0.23	0.14614	0.211	0.00288
hrq1	hrq1	YML118W	NGL3		1.12778	0.057	0.97721	0.01	0.14625	0.057	4e-05
hrq1	hrq1	YNL050C	YNL050C		1.15511	0.121	1.00179	0.042	0.14681	0.121	0.00032
hrq1	hrq1	YPR121W	THI22		1.14084	0.076	0.99497	0.024	0.14817	0.076	0.00148	status=JK
hrq1	hrq1	YMR026C	PEX12		1.16402	0.039	1.0161	0.01	0.14877	0.039	1e-05
hrq1	hrq1	YHR008C	SOD2		0.69094	0.145	0.58192	0.189	0.14884	0.145	0.00246
hrq1	hrq1	YDL237W	AIM6		1.03289	0.046	0.88888	0.07	0.14887	0.046	2e-05
hrq1	hrq1	YNL141W	AAH1		0.80739	0.108	0.65577	0.007	0.14963	0.108	0.00065
hrq1	hrq1	YPL024W	RMI1		1.00504	0.092	0.85592	0.009	0.14984	0.092	0.00021
hrq1	hrq1	YNL079C	TPM1		1.04929	0.049	0.90057	0.031	0.14996	0.049	3e-05
hrq1	hrq1	YDL219W	DTD1		0.97924	0.046	0.82939	0.014	0.15034	0.046	3e-05
hrq1	hrq1	YMR201C	RAD14		0.47603	0.144	0.33196	0.149	0.15058	0.144	0.02936	status=JK
hrq1	hrq1	YNL135C	FPR1		1.05689	0.077	0.90302	0.041	0.15168	0.077	0.0001
hrq1	hrq1	YNL037C	IDH1		0.98812	0.013	0.83494	0.005	0.15209	0.013	6e-05	status=JK
hrq1	hrq1	YIL027C	EMC5		1.14815	0.066	0.9973	0.015	0.15237	0.065	5e-05
hrq1	hrq1	YNL068C	FKH2		1.1675	0.026	1.01681	0.008	0.15271	0.026	0.00017	status=JK
hrq1	hrq1	YDL240W	LRG1		1.01726	0.049	0.85989	0.027	0.15311	0.049	3e-05
hrq1	hrq1	YOL036W	YOL036W		1.17588	0.024	1.02416	0.011	0.15581	0.024	0.00013	status=JK
hrq1	hrq1	YER187W	YER187W		1.22668	0.014	1.07088	0.03	0.15587	0.014	0
hrq1	hrq1	YIR023W	DAL81		0.98755	0.014	0.83867	0.014	0.15639	0.014	7e-05	status=JK
hrq1	hrq1	YBR126C	TPS1		0.8657	0.017	0.72409	0.053	0.15678	0.017	0
hrq1	hrq1	YOR333C	YOR333C		1.05503	0.101	0.90192	0.021	0.15682	0.101	0.00024
hrq1	hrq1	YLR192C	HCR1		0.83852	0.019	0.68136	0.01	0.15703	0.019	0
hrq1	hrq1	YMR065W	KAR5		0.93813	0.05	0.7873	0.055	0.15773	0.05	4e-05
hrq1	hrq1	YMR034C	YMR034C		1.20028	0.001	1.03928	0.003	0.16096	0.001	0	status=JK
hrq1	hrq1	YLR376C	PSY3		1.14924	0.019	0.98937	0.012	0.1613	0.019	0
hrq1	hrq1	YDL213C	NOP6		1.00733	0.017	0.85476	0.038	0.16222	0.017	9e-05	status=JK
hrq1	hrq1	YMR010W	YMR010W		1.18163	0.038	1.02347	0.017	0.16245	0.038	1e-05
hrq1	hrq1	YMR311C	GLC8		1.16163	0.056	0.99805	0.01	0.16255	0.056	3e-05
hrq1	hrq1	YMR008C	PLB1		1.20211	0.105	1.0354	0.004	0.1642	0.105	0.00018
hrq1	hrq1	YNL157W	IGO1		1.20564	0.043	1.04157	0.051	0.16506	0.043	1e-05
hrq1	hrq1	YMR115W	MGR3		1.12397	0.048	0.95269	0.018	0.16557	0.048	2e-05
hrq1	hrq1	YKL010C	UFD4		1.1566	0.036	0.98533	0.009	0.16747	0.036	1e-05
hrq1	hrq1	YNL081C	SWS2		0.93907	0.026	0.76554	0.017	0.16756	0.026	1e-05
hrq1	hrq1	YMR289W	ABZ2		1.21678	0.022	1.04827	0.022	0.16771	0.022	0.00011	status=JK
hrq1	hrq1	YMR110C	HFD1		1.23826	0.036	1.0684	0.005	0.16794	0.036	1e-05
hrq1	hrq1	YMR099C	YMR099C		1.17496	0.089	0.99786	0.009	0.17363	0.089	0.00012
hrq1	hrq1	YMR012W	CLU1		1.19064	0.05	1.00959	0.026	0.17441	0.05	0.0006	status=JK
hrq1	hrq1	YDL192W	ARF1		0.74344	0.111	0.53509	0.135	0.17479	0.111	0.00089
hrq1	hrq1	YML128C	MSC1		1.12321	0.03	0.95202	0.039	0.17612	0.03	0.00023	status=JK
hrq1	hrq1	YNL153C	GIM3		0.8612	0.109	0.69964	0.137	0.17711	0.109	0.00055
hrq1	hrq1	YOL056W	GPM3		1.1453	0.021	0.97229	0.011	0.1776	0.021	0.00011	status=JK
hrq1	hrq1	YDL236W	PHO13		0.97815	0.066	0.79922	0.018	0.17946	0.066	9e-05
hrq1	hrq1	YIL090W	ICE2		0.57367	0.085	0.40572	0.043	0.17993	0.085	0.00089
hrq1	hrq1	YER178W	PDA1		0.95667	0.045	0.77845	0.011	0.18119	0.045	3e-05
hrq1	hrq1	YML032C	RAD52		0.94832	0.028	0.76389	0.022	0.18388	0.028	1e-05
hrq1	hrq1	YIL157C	COA1		1.14718	0.084	0.95318	0.048	0.18619	0.083	0.00011
hrq1	hrq1	YMR058W	FET3		1.22692	0.066	1.03942	0.001	0.18665	0.066	4e-05
hrq1	hrq1	YMR109W	MYO5		1.21274	0.007	1.02804	0.019	0.18704	0.007	1e-05	status=JK
hrq1	hrq1	YPR066W	UBA3		0.90329	0.017	0.71778	0.023	0.18907	0.017	0
hrq1	hrq1	YDL211C	YDL211C		1.07326	0.019	0.88465	0.007	0.18971	0.019	0.00011	status=JK
hrq1	hrq1	YER095W	RAD51		1.08912	0.042	0.90076	0.019	0.19072	0.041	2e-05
hrq1	hrq1	YMR233W	TRI1		1.21867	0.035	1.02572	0.01	0.19184	0.035	1e-05
hrq1	hrq1	YDR008C	YDR008C		1.02231	0.037	0.8302	0.024	0.19402	0.037	1e-05
hrq1	hrq1	YML052W	SUR7		1.16217	0.171	0.96658	0.028	0.19522	0.171	0.00086
hrq1	hrq1	YHR059W	FYV4		0.34094	0.098	0.14366	0.024	0.19541	0.098	0.00606
hrq1	hrq1	YHL020C	OPI1		0.94302	0.06	0.74619	0.014	0.19771	0.06	0.00134	status=JK
hrq1	hrq1	YKR101W	SIR1		0.97176	0.083	0.76579	0.017	0.19775	0.083	0.00017
hrq1	hrq1	YLR235C	YLR235C		0.9938	0.06	0.79289	0.021	0.19948	0.06	6e-05
hrq1	hrq1	YLR334C	YLR334C		1.12454	0.044	0.93653	0.058	0.20231	0.044	2e-05
hrq1	hrq1	YDL241W	YDL241W		1.02913	0.063	0.82021	0.049	0.20274	0.063	6e-05
hrq1	hrq1	YMR075W	RCO1		1.19457	0.008	0.98964	0.007	0.20533	0.008	2e-05	status=JK
hrq1	hrq1	YMR073C	IRC21		1.15631	0.11	0.95752	0.049	0.20544	0.109	0.00023
hrq1	hrq1	YMR103C	YMR103C		1.20772	0.068	1.00149	0.015	0.20866	0.068	5e-05
hrq1	hrq1	YMR085W	YMR085W		1.26723	0.023	1.04671	0.039	0.21016	0.023	0
hrq1	hrq1	YMR068W	AVO2		1.24276	0.072	1.034	0.017	0.21022	0.072	5e-05
hrq1	hrq1	YIL132C	CSM2		1.20112	0.083	0.98973	0.006	0.21425	0.083	9e-05
hrq1	hrq1	YMR063W	RIM9		1.07407	0.088	0.86099	0.033	0.21556	0.088	0.00015
hrq1	hrq1	YJR087W	YJR087W		1.08134	0.045	0.86094	0.052	0.21579	0.045	2e-05
hrq1	hrq1	YMR044W	IOC4		1.29216	0.065	1.07268	0.012	0.21602	0.064	3e-05
hrq1	hrq1	YMR106C	YKU80		1.24988	0.097	1.01846	0.046	0.21745	0.097	0.00013
hrq1	hrq1	YDL218W	YDL218W		0.98345	0.053	0.74797	0.062	0.21972	0.053	4e-05
hrq1	hrq1	YMR057C	YMR057C		1.24783	0.027	1.02589	0.003	0.22122	0.027	0.00016	status=JK
hrq1	hrq1	YNL045W	LAP2		1.24687	0.076	1.03632	0.047	0.22368	0.076	6e-05
hrq1	hrq1	YML022W	APT1		0.8782	0.336	0.66281	0.138	0.2272	0.336	0.01361
hrq1	hrq1	YLR180W	SAM1		0.99805	0.149	0.78337	0.046	0.23206	0.149	0.0009
hrq1	hrq1	YNL051W	COG5		1.20372	0.038	0.96826	0.019	0.23905	0.038	1e-05
hrq1	hrq1	YDL122W	UBP1		0.85762	0.059	0.62429	0.154	0.24688	0.059	0.00159	status=JK
hrq1	hrq1	YDL216C	RRI1		1.01975	0.029	0.77502	0.038	0.24712	0.029	0.00027	status=JK
hrq1	hrq1	YDL224C	WHI4		0.98702	0.058	0.73633	0.056	0.24958	0.058	6e-05
hrq1	hrq1	YMR067C	UBX4		1.22057	0.054	0.9737	0.058	0.25361	0.054	2e-05
hrq1	hrq1	YDL234C	GYP7		1.07147	0.023	0.75529	0.191	0.25403	0.023	0.00016	status=JK
hrq1	hrq1	YMR075C-A	YMR075C-A		1.22767	0.091	0.97014	0.031	0.2543	0.091	0.00011
hrq1	hrq1	YLR065C	ENV10		0.99195	0.215	0.73628	0.027	0.26149	0.215	0.0027
hrq1	hrq1	YMR100W	MUB1		1.11599	0.154	0.85156	0.029	0.26512	0.154	0.00071
hrq1	hrq1	YMR096W	SNZ1		1.2212	0.131	0.95388	0.009	0.26776	0.131	0.00034
hrq1	hrq1	YDL223C	HBT1		1.0219	0.07	0.73189	0.081	0.26869	0.069	9e-05
hrq1	hrq1	YJR077C	MIR1		0.43424	0.035	0.15704	0.016	0.27111	0.035	0.00214	status=JK
hrq1	hrq1	YNL080C	EOS1		0.8171	0.045	0.54841	0.029	0.27181	0.045	5e-05
hrq1	hrq1	YMR087W	YMR087W		1.2517	0.075	0.98209	0.037	0.27605	0.075	6e-05
hrq1	hrq1	YMR095C	SNO1		1.2996	0.028	1.02943	0.041	0.27849	0.028	0
hrq1	hrq1	YDL222C	FMP45		1.03119	0.038	0.74745	0.008	0.28317	0.038	1e-05
hrq1	hrq1	YMR086W	SEG1		1.33143	0.09	1.04043	0.025	0.2843	0.09	8e-05
hrq1	hrq1	YOR293W	RPS10A		1.02366	0.05	0.72711	0.024	0.29166	0.05	3e-05
hrq1	hrq1	YMR035W	IMP2		1.20257	0.029	0.90309	0.017	0.29665	0.029	0.0002	status=JK
hrq1	hrq1	YDR161W	YDR161W		0.91765	0.156	0.61661	0.037	0.30656	0.156	0.00132
hrq1	hrq1	YMR101C	SRT1		1.34083	0.213	1.0353	0.021	0.31014	0.213	0.00108
hrq1	hrq1	YDL233W	MFG1		1.02507	0.029	0.69425	0.029	0.31502	0.029	1e-05
hrq1	hrq1	YCR063W	BUD31		0.9348	0.051	0.61544	0.021	0.32051	0.051	5e-05
hrq1	hrq1	YOR312C	RPL20B		1.11667	0.062	0.79191	0.019	0.3313	0.062	5e-05
hrq1	hrq1	YLR346C	YLR346C		1.34868	0.078	1.01101	0.056	0.33369	0.078	0.00113	status=JK
hrq1	hrq1	YHL006C	SHU1		1.3837	0.105	1.04269	0.015	0.337	0.105	0.00012
hrq1	hrq1	YMR102C	YMR102C		1.36346	0.071	1.02493	0.027	0.33881	0.07	4e-05
hrq1	hrq1	YKL093W	MBR1		0.83485	0.071	0.49767	0.213	0.33938	0.071	0.00017
hrq1	hrq1	YHR153C	SPO16		0.61288	0.319	0.28528	0.043	0.34425	0.318	0.03099
hrq1	hrq1	YFL036W	RPO41		0.55621	0.105	0.20411	0.01	0.35546	0.105	0.00179
hrq1	hrq1	YMR092C	AIP1		1.34139	0.011	0.98184	0.042	0.36439	0.011	2e-05	status=JK
hrq1	hrq1	YDL230W	PTP1		1.00937	0.105	0.64156	0.063	0.38272	0.105	0.00031
hrq1	hrq1	YDL226C	GCS1		0.99779	0.07	0.62076	0.049	0.38531	0.069	9e-05
hrq1	hrq1	YDR514C	YDR514C		0.64146	0.125	0.24545	0.088	0.38859	0.125	0.00197
hrq1	hrq1	YGL083W	SCY1		0.9478	0.107	0.5508	0.608	0.39405	0.107	0.0042	status=JK
hrq1	hrq1	YDL231C	BRE4		1.0533	0.047	0.62913	0.043	0.417	0.047	2e-05
hrq1	hrq1	YDL229W	SSB1		0.95694	0.017	0.38697	0.044	0.57284	0.017	0.00011	status=JK
hrq1	hrq1	YDL232W	OST4		0.81255	0.166	0.2021	0.055	0.60238	0.166	0.00226

## Sheet: Table S9
Query ORF	Query Name	Array ORF	Array Name	Array annotation	Normalized colony size (EXPERIMENT)	Normalized colony std. dev. (EXPERIMENT)	Normalized colony size (CONTROL)	Normalized colony std. dev. (CONTROL)	Score	Score stdev	p-Value	Additional information
hrq1	hrq1	YLR131C	ACE2		1.0423	0.093	0.87119	0.162	0.13796	0.093	0.00019
hrq1	hrq1	YKL206C	ADD66		0.81985	0.064	0.95453	0.02	-0.13845	0.064	0.00013
hrq1	hrq1	YMR300C	ADE4		0.88478	0.011	1.0887	0.005	-0.20543	0.011	5e-05	status=JK
hrq1	hrq1	YDL239C	ADY3		1.06226	0.062	0.93075	0.077	0.11481	0.062	6e-05
hrq1	hrq1	YMR282C	AEP2		0.66465	0.025	1.00449	0.015	-0.33608	0.025	0.00048	status=JK
hrq1	hrq1	YCR082W	AHC2		0.92313	0.15	1.03347	0.034	-0.11618	0.15	0.00117
hrq1	hrq1	YNR074C	AIF1		0.90794	0.013	1.03172	0.032	-0.12557	0.013	7e-05	status=JK
hrq1	hrq1	YFR011C	AIM13		0.92522	0.027	1.01162	0.016	-0.08536	0.027	1e-05
hrq1	hrq1	YHR198C	AIM18		0.82646	0.106	0.9724	0.033	-0.14967	0.106	0.00058
hrq1	hrq1	YJR100C	AIM25		1.11545	0.023	1.00038	0.034	0.10789	0.023	0
hrq1	hrq1	YKR074W	AIM29		0.79961	0.011	0.88804	0.025	-0.09717	0.011	6e-05	status=JK
hrq1	hrq1	YDL237W	AIM6		1.03306	0.066	0.88888	0.07	0.14906	0.066	7e-05
hrq1	hrq1	YMR092C	AIP1		1.21669	0.063	0.98184	0.042	0.24064	0.063	4e-05
hrq1	hrq1	YIL079C	AIR1		0.91356	0.082	0.98618	0.046	-0.08094	0.082	0.0002
hrq1	hrq1	YMR170C	ALD2		0.74271	0.044	1.09325	0.017	-0.34696	0.044	0.00119	status=JK
hrq1	hrq1	YMR169C	ALD3		0.92871	0.111	1.03762	0.035	-0.10442	0.111	0.00046
hrq1	hrq1	YPL061W	ALD6		1.09584	0.061	0.98409	0.038	0.0991	0.061	0.00103	status=JK
hrq1	hrq1	YLR089C	ALT1		0.55123	0.063	0.68713	0.029	-0.13174	0.063	0.00041
hrq1	hrq1	YDR111C	ALT2		0.98444	0.088	1.10495	0.026	-0.11598	0.088	0.0002
hrq1	hrq1	YGR225W	AMA1		0.91839	0.111	1.01073	0.01	-0.09437	0.111	0.00048
hrq1	hrq1	YKL157W	APE2		0.94811	0.088	1.04121	0.045	-0.08883	0.088	0.00022
hrq1	hrq1	YNL077W	APJ1		1.17748	0.007	0.89817	0.128	0.26405	0.007	1e-05	status=JK
hrq1	hrq1	YKL114C	APN1		0.89497	0.038	1.0071	0.02	-0.10812	0.038	2e-05
hrq1	hrq1	YNL094W	APP1		1.07825	0.076	0.99649	0.036	0.09081	0.076	0.0001
hrq1	hrq1	YIL040W	APQ12		0.1462	0.03	0.51895	0.254	-0.32121	0.03	0.01377	status=JK
hrq1	hrq1	YLR170C	APS1		0.91014	0.111	1.00944	0.024	-0.09468	0.111	0.00049
hrq1	hrq1	YML022W	APT1		0.85947	0.241	0.66281	0.138	0.20906	0.241	0.00566
hrq1	hrq1	YDR441C	APT2		0.82072	0.079	0.97911	0.079	-0.15863	0.079	0.00024
hrq1	hrq1	YMR041C	ARA2		0.68715	0.081	0.78191	0.053	-0.0863	0.081	0.00044
hrq1	hrq1	YLR370C	ARC18		1.0547	0.065	0.95096	0.043	0.10408	0.065	6e-05
hrq1	hrq1	YNR019W	ARE2		0.86062	0.184	1.00138	0.009	-0.14513	0.184	0.00259
hrq1	hrq1	YDL192W	ARF1		0.70561	0.248	0.53509	0.135	0.13701	0.248	0.01078
hrq1	hrq1	YGL148W	ARO2		0.82094	0.025	0.73655	0.074	0.08466	0.025	0.0003	status=JK
hrq1	hrq1	YGR068C	ART5		1.08433	0.058	0.98329	0.011	0.0987	0.058	4e-05
hrq1	hrq1	YDR101C	ARX1		0.79086	0.077	0.9112	0.052	-0.1136	0.076	0.00025
hrq1	hrq1	YMR116C	ASC1		0.52676	0.016	0.70469	0.022	-0.17952	0.016	1e-05
hrq1	hrq1	YMR119W	ASI1		1.13034	0.04	0.99957	0.029	0.13011	0.04	0.00042	status=JK
hrq1	hrq1	YGR177C	ATF2		1.03779	0.129	1.11605	0.015	-0.0844	0.129	0.00053
hrq1	hrq1	YGL180W	ATG1		0.87295	0.046	0.99262	0.047	-0.12765	0.046	4e-05
hrq1	hrq1	YFR021W	ATG18		1.05076	0.023	0.96564	0.038	0.0878	0.023	0.00016	status=JK
hrq1	hrq1	YBL078C	ATG8		0.85934	0.153	0.96041	0.035	-0.09977	0.153	0.00152
hrq1	hrq1	YDL149W	ATG9		0.86118	0.02	0.9873	0.038	-0.13043	0.02	0.00017	status=JK
hrq1	hrq1	YLR393W	ATP10		1.02392	0.019	0.8935	0.019	0.13135	0.019	0
hrq1	hrq1	YML081C-A	ATP18		1.06792	0.012	0.88245	0.066	0.16508	0.012	4e-05	status=JK
hrq1	hrq1	YNR020C	ATP23		1.01477	0.014	0.82037	0.035	0.19459	0.014	6e-05	status=JK
hrq1	hrq1	YMR068W	AVO2		1.21434	0.04	1.034	0.017	0.18273	0.039	1e-05
hrq1	hrq1	YBR068C	BAP2		0.97356	0.048	1.05468	0.006	-0.08332	0.048	3e-05
hrq1	hrq1	YER167W	BCK2		0.75648	0.023	0.98098	0.033	-0.22411	0.023	0.00031	status=JK
hrq1	hrq1	YBR200W	BEM1		0.781	0.014	0.61468	0.138	0.14624	0.014	0.00011	status=JK
hrq1	hrq1	YER155C	BEM2		1.03263	0.043	0.91766	0.026	0.11242	0.043	2e-05
hrq1	hrq1	YPL161C	BEM4		0.98064	0.03	0.87783	0.036	0.11059	0.03	0.0003	status=JK
hrq1	hrq1	YCL029C	BIK1		1.07613	0.055	0.98781	0.004	0.0879	0.055	4e-05
hrq1	hrq1	YDR099W	BMH2		0.92841	0.006	1.04783	0.012	-0.12055	0.006	1e-05	status=JK
hrq1	hrq1	YFR047C	BNA6		0.84129	0.08	0.69925	0.051	0.13954	0.08	0.00023
hrq1	hrq1	YDL074C	BRE1		0.55281	0.14	0.80121	0.035	-0.232	0.14	0.00425
hrq1	hrq1	YDL074C	BRE1		0.6143	0.004	0.81912	0.032	-0.20188	0.004	1e-05	status=JK
hrq1	hrq1	YLR015W	BRE2		0.79015	0.051	0.91989	0.02	-0.12402	0.051	7e-05
hrq1	hrq1	YDL231C	BRE4		0.97366	0.022	0.62913	0.043	0.33743	0.022	0.00016	status=JK
hrq1	hrq1	YOL137W	BSC6		0.78092	0.238	0.98644	0.041	-0.20565	0.238	0.00717
hrq1	hrq1	YPR171W	BSP1		0.98798	0.081	1.09775	0.009	-0.1133	0.081	0.00015
hrq1	hrq1	YPL069C	BTS1		0.33362	0.005	0.54698	0.036	-0.2178	0.005	7e-05	status=JK
hrq1	hrq1	YGR188C	BUB1		0.55794	0.116	0.69618	0.027	-0.13195	0.116	0.00236
hrq1	hrq1	YMR055C	BUB2		1.24379	0.175	1.01029	0.066	0.218	0.175	0.00076
hrq1	hrq1	YGL174W	BUD13		0.92753	0.113	0.80691	0.029	0.12444	0.113	0.0005
hrq1	hrq1	YFL023W	BUD27		0.76541	0.021	0.88185	0.026	-0.11197	0.021	1e-05
hrq1	hrq1	YCR063W	BUD31		0.91109	0.047	0.61544	0.021	0.29643	0.047	4e-05
hrq1	hrq1	YMR275C	BUL1		0.70427	0.073	1.01167	0.034	-0.30754	0.073	0.00031
hrq1	hrq1	YDR423C	CAD1		0.87762	0.125	1.03104	0.031	-0.15168	0.125	0.00078
hrq1	hrq1	YPL048W	CAM1		0.71668	0.075	0.59647	0.009	0.1152	0.075	0.00031
hrq1	hrq1	YML042W	CAT2		0.32484	0.099	0.83246	0.229	-0.5408	0.099	0.02944	status=JK
hrq1	hrq1	YMR280C	CAT8		0.79574	0.003	0.92843	0.007	-0.13697	0.003	1e-05	status=JK
hrq1	hrq1	YPL178W	CBC2		0.31763	0.176	0.16768	0.072	0.16695	0.176	0.03673
hrq1	hrq1	YGR174C	CBP4		0.90086	0.005	0.98018	0.072	-0.08158	0.005	1e-05	status=JK
hrq1	hrq1	YBR131W	CCZ1		0.94176	0.09	0.83261	0.016	0.10521	0.09	0.00024
hrq1	hrq1	YLR418C	CDC73		0.84347	0.053	0.99898	0.036	-0.14855	0.053	7e-05
hrq1	hrq1	YML036W	CGI121		1.06774	0.016	0.97288	0.051	0.10746	0.016	0
hrq1	hrq1	YLR098C	CHA4		0.85362	0.113	0.96669	0.045	-0.10957	0.113	0.00062
hrq1	hrq1	YPR119W	CLB2		1.08095	0.016	0.9863	0.068	0.08527	0.016	0
hrq1	hrq1	YGL215W	CLG1		0.8898	0.388	0.97662	0.059	-0.08674	0.388	0.01951
hrq1	hrq1	YMR199W	CLN1		0.89083	0.031	1.02565	0.038	-0.13671	0.031	1e-05
hrq1	hrq1	YMR012W	CLU1		1.12257	0.01	1.00959	0.026	0.10728	0.01	3e-05	status=JK
hrq1	hrq1	YKL137W	CMC1		1.01576	0.042	0.87199	0.032	0.14605	0.042	2e-05
hrq1	hrq1	YML057W	CMP2		1.11756	0.073	1.00713	0.048	0.10906	0.073	8e-05
hrq1	hrq1	YFR046C	CNN1		1.18607	0.075	1.04404	0.045	0.13312	0.075	7e-05
hrq1	hrq1	YIL157C	COA1		1.13755	0.058	0.95318	0.048	0.17498	0.058	4e-05
hrq1	hrq1	YMR244C-A	COA6		0.83209	0.149	0.93551	0.013	-0.10351	0.149	0.00153
hrq1	hrq1	YNL051W	COG5		1.06712	0.076	0.96826	0.019	0.10116	0.076	0.0001
hrq1	hrq1	YML071C	COG8		1.13719	0.083	1.02331	0.01	0.11431	0.082	0.0001
hrq1	hrq1	YOL008W	COQ10		1.03268	0.01	0.91024	0.008	0.12431	0.01	3e-05	status=JK
hrq1	hrq1	YNR041C	COQ2		1.09243	0.047	0.93042	0.068	0.15726	0.047	2e-05
hrq1	hrq1	YLR038C	COX12		1.01086	0.042	0.89456	0.037	0.12184	0.042	2e-05
hrq1	hrq1	YNL052W	COX5A		1.01934	0.064	0.90524	0.111	0.10537	0.064	7e-05
hrq1	hrq1	YIL111W	COX5B		0.94522	0.043	1.0315	0.029	-0.09327	0.043	3e-05
hrq1	hrq1	YMR256C	COX7		0.74516	0.102	1.04594	0.021	-0.302	0.102	0.0007
hrq1	hrq1	YDR155C	CPR1		1.08718	0.016	0.99299	0.028	0.09994	0.016	0
hrq1	hrq1	YNR028W	CPR8		1.07976	0.028	0.97892	0.049	0.09647	0.027	0.00022	status=JK
hrq1	hrq1	YJL172W	CPS1		0.79756	0.122	1.07087	0.009	-0.27828	0.122	0.00096
hrq1	hrq1	YNR010W	CSE2		0.80964	0.126	0.72093	0.2	0.11235	0.126	0.00103
hrq1	hrq1	YCR086W	CSM1		0.98027	0.047	0.88987	0.017	0.09067	0.047	3e-05
hrq1	hrq1	YIL132C	CSM2		1.29744	0.061	0.98973	0.006	0.30887	0.061	3e-05
hrq1	hrq1	YMR048W	CSM3		0.73302	0.14	0.98202	0.054	-0.26043	0.14	0.00186
hrq1	hrq1	YLR394W	CST9		0.88631	0.249	1.08567	0.066	-0.20298	0.248	0.00567
hrq1	hrq1	YMR078C	CTF18		0.88941	0.051	0.78374	0.032	0.10961	0.051	5e-05
hrq1	hrq1	YKL139W	CTK1		0.648	0.09	0.81306	0.025	-0.15774	0.09	0.00072
hrq1	hrq1	YML112W	CTK3		0.89966	0.458	1.01329	0.074	-0.11892	0.457	0.02929
hrq1	hrq1	YMR180C	CTL1		0.70088	0.062	1.0269	0.021	-0.32786	0.062	0.00019
hrq1	hrq1	YMR264W	CUE1		1.18249	0.071	1.03386	0.043	0.1554	0.071	6e-05
hrq1	hrq1	YML101C	CUE4		1.21394	0.061	1.0326	0.024	0.17487	0.061	4e-05
hrq1	hrq1	YOR037W	CYC2		1.08956	0.09	0.96673	0.027	0.11736	0.09	0.00016
hrq1	hrq1	YOR065W	CYT1		1.01639	0.007	0.87514	0.019	0.14646	0.007	2e-05	status=JK
hrq1	hrq1	YIR029W	DAL2		1.12315	0.024	1.03065	0.047	0.08355	0.024	0.00015	status=JK
hrq1	hrq1	YKR034W	DAL80		1.15604	0.031	1.00597	0.039	0.14992	0.031	1e-05
hrq1	hrq1	YPL170W	DAP1		1.00779	0.061	1.10074	0.055	-0.08234	0.061	6e-05
hrq1	hrq1	YGR092W	DBF2		0.54723	0.061	0.81899	0.034	-0.26826	0.061	0.00039
hrq1	hrq1	YCL016C	DCC1		0.77176	0.034	0.89737	0.045	-0.13723	0.034	2e-05
hrq1	hrq1	YMR173W	DDR48		0.73957	0.151	0.97424	0.005	-0.23353	0.151	0.00228
hrq1	hrq1	YFL001W	DEG1		1.06184	0.062	0.88779	0.004	0.17074	0.062	6e-05
hrq1	hrq1	YBR201W	DER1		0.93877	0.093	1.01963	0.031	-0.08634	0.092	0.00026
hrq1	hrq1	YMR238W	DFG5		1.1253	0.053	0.98952	0.054	0.13623	0.053	3e-05
hrq1	hrq1	YOR080W	DIA2		0.24168	0.028	0.54943	0.006	-0.30788	0.028	0.0004
hrq1	hrq1	YDR480W	DIG2		1.07525	0.003	0.98573	0.009	0.08701	0.003	0	status=JK
hrq1	hrq1	YER166W	DNF1		0.89815	0.088	1.02539	0.036	-0.13013	0.088	0.00025
hrq1	hrq1	YMR162C	DNF3		0.93122	0.039	1.06641	0.014	-0.13537	0.039	0.00058	status=JK
hrq1	hrq1	YOR005C	DNL4		0.92575	0.067	1.09338	0.015	-0.16457	0.067	0.0001
hrq1	hrq1	YKL213C	DOA1		0.96709	0.045	0.87554	0.018	0.09113	0.045	3e-05
hrq1	hrq1	YIL010W	DOT5		1.08891	0.017	0.98766	0.029	0.10502	0.017	0
hrq1	hrq1	YDR121W	DPB4		1.01127	0.01	1.16979	0.026	-0.15584	0.01	3e-05	status=JK
hrq1	hrq1	YIL103W	DPH1		1.01532	0.025	0.92966	0.03	0.08632	0.025	0.0002	status=JK
hrq1	hrq1	YMR276W	DSK2		0.73688	0.065	1.00557	0.016	-0.26881	0.064	0.00018
hrq1	hrq1	YGL043W	DST1		0.53536	0.286	0.72612	0.206	-0.19765	0.285	0.03317
hrq1	hrq1	YDL219W	DTD1		0.95916	0.03	0.82939	0.014	0.1303	0.03	1e-05
hrq1	hrq1	YMR299C	DYN3		1.06657	0.102	0.97725	0.043	0.09685	0.102	0.00024
hrq1	hrq1	YGR146C	ECL1		0.93859	0.017	1.04421	0.02	-0.10274	0.017	0.0001	status=JK
hrq1	hrq1	YDR125C	ECM18		1.01608	0.034	1.1995	0.042	-0.17651	0.034	1e-05
hrq1	hrq1	YBL101C	ECM21		1.11869	0.033	1.01387	0.026	0.10842	0.033	1e-05
hrq1	hrq1	YHL043W	ECM34		0.87039	0.081	0.9781	0.103	-0.13049	0.081	0.00022
hrq1	hrq1	YMR176W	ECM5		0.7625	0.132	0.99568	0.009	-0.22794	0.132	0.0014
hrq1	hrq1	YBR033W	EDS1		1.04648	0.043	0.96304	0.015	0.08309	0.043	2e-05
hrq1	hrq1	YPL037C	EGD1		1.05817	0.072	0.96906	0.018	0.09949	0.072	9e-05
hrq1	hrq1	YDR036C	EHD3		0.91882	0.025	1.01516	0.045	-0.09999	0.025	1e-05
hrq1	hrq1	YMR031C	EIS1		1.20345	0.014	1.01201	0.091	0.19452	0.014	0
hrq1	hrq1	YOR144C	ELG1		0.59389	0.01	0.93661	0.039	-0.34241	0.01	9e-05	status=JK
hrq1	hrq1	YMR312W	ELP6		0.96152	0.025	0.8221	0.061	0.12083	0.025	0.00023	status=JK
hrq1	hrq1	YIL027C	EMC5		1.11089	0.044	0.9973	0.015	0.11697	0.044	2e-05
hrq1	hrq1	YDR512C	EMI1		1.0298	0.005	0.89308	0.022	0.13911	0.005	1e-05	status=JK
hrq1	hrq1	YJR125C	ENT3		0.81313	0.426	0.99785	0.052	-0.19373	0.426	0.03168
hrq1	hrq1	YLR065C	ENV10		0.86919	0.082	0.73628	0.027	0.13885	0.082	0.00023
hrq1	hrq1	YNL080C	EOS1		0.80961	0.027	0.54841	0.029	0.26354	0.027	0.00037	status=JK
hrq1	hrq1	YIL005W	EPS1		1.1015	0.07	0.98778	0.014	0.10731	0.069	7e-05
hrq1	hrq1	YHR123W	EPT1		0.97433	0.099	1.08682	0.044	-0.11667	0.099	0.00029
hrq1	hrq1	YHR032W	ERC1		1.13276	0.025	1.02136	0.006	0.11449	0.025	0.00016	status=JK
hrq1	hrq1	YDR414C	ERD1		1.04708	0.015	0.95729	0.012	0.09106	0.015	7e-05	status=JK
hrq1	hrq1	YMR202W	ERG2		0.57437	0.142	0.77448	0.057	-0.19131	0.142	0.00397
hrq1	hrq1	YMR015C	ERG5		1.06058	0.021	0.94632	0.013	0.10979	0.021	0
hrq1	hrq1	YAL007C	ERP2		0.93912	0.104	1.0416	0.014	-0.09816	0.104	0.00037
hrq1	hrq1	YBR239C	ERT1		1.10075	0.06	1.02108	0.022	0.08107	0.06	4e-05
hrq1	hrq1	YPR037C	ERV2		1.08232	0.049	0.99641	0.008	0.08453	0.049	3e-05
hrq1	hrq1	YML012W	ERV25		0.96434	0.034	1.05306	0.027	-0.09356	0.034	1e-05
hrq1	hrq1	YML067C	ERV41		1.12597	0.01	1.00352	0.052	0.11756	0.01	2e-05	status=JK
hrq1	hrq1	YIL009C-A	EST3		0.99442	0.044	1.09104	0.01	-0.09375	0.044	2e-05
hrq1	hrq1	YBR026C	ETR1		0.41834	0.01	0.57989	0.066	-0.14737	0.01	0.00018	status=JK
hrq1	hrq1	YJL157C	FAR1		0.93081	0.074	1.02551	0.023	-0.08977	0.074	0.00209	status=JK
hrq1	hrq1	YMR052W	FAR3		1.15076	0.128	1.04297	0.041	0.10714	0.128	0.00038
hrq1	hrq1	YKR016W	FCJ1		0.853	0.071	0.95221	0.017	-0.10106	0.071	0.00016
hrq1	hrq1	YCR034W	FEN1		1.17542	0.037	1.00104	0.007	0.17014	0.037	1e-05
hrq1	hrq1	YMR058W	FET3		1.14146	0.102	1.03942	0.001	0.10216	0.102	0.00019
hrq1	hrq1	YDR130C	FIN1		0.96336	0.083	1.0799	0.023	-0.11945	0.083	0.00017
hrq1	hrq1	YGL139W	FLC3		0.77518	0.118	0.89724	0.067	-0.12242	0.118	0.00094
hrq1	hrq1	YKR102W	FLO10		1.06749	0.04	0.98034	0.007	0.08555	0.04	1e-05
hrq1	hrq1	YIL134W	FLX1		0.95098	0.022	0.80068	0.009	0.1512	0.022	0
hrq1	hrq1	YDL222C	FMP45		0.97104	0.015	0.74745	0.008	0.22309	0.015	8e-05	status=JK
hrq1	hrq1	YGR052W	FMP48		1.09489	0.012	0.9977	0.017	0.09938	0.012	4e-05	status=JK
hrq1	hrq1	YDR110W	FOB1		1.0566	0.009	1.16623	0.022	-0.10546	0.009	2e-05	status=JK
hrq1	hrq1	YNL135C	FPR1		1.07513	0.051	0.90302	0.041	0.16861	0.051	3e-05
hrq1	hrq1	YDR519W	FPR2		0.4664	0.267	0.91458	0.128	-0.41452	0.267	0.03961
hrq1	hrq1	YCL026C-A	FRM2		0.93526	0.141	1.00313	0.06	-0.08241	0.141	0.00094
hrq1	hrq1	YOR271C	FSF1		0.86388	0.025	0.98147	0.009	-0.11377	0.025	0.00028	status=JK
hrq1	hrq1	YPL262W	FUM1		0.8435	0.046	0.75664	0.003	0.08571	0.046	4e-05
hrq1	hrq1	YAL019W	FUN30		0.85914	0.029	0.96744	0.014	-0.11391	0.029	0.00037	status=JK
hrq1	hrq1	YIL097W	FYV10		0.82408	0.123	0.96503	0.008	-0.14292	0.123	0.00091
hrq1	hrq1	YGL254W	FZF1		0.86845	0.035	0.96266	0.006	-0.09731	0.035	2e-05
hrq1	hrq1	YMR250W	GAD1		0.80604	0.135	0.93472	0.045	-0.11565	0.135	0.00127
hrq1	hrq1	YBR018C	GAL7		0.91738	0.112	0.99948	0.031	-0.08536	0.112	0.00049
hrq1	hrq1	YMR307W	GAS1		0.87812	0.041	1.01892	0.024	-0.14339	0.041	3e-05
hrq1	hrq1	YMR215W	GAS3		0.8496	0.096	0.99591	0.007	-0.15017	0.096	0.0004
hrq1	hrq1	YDL226C	GCS1		1.05826	0.038	0.62076	0.049	0.44576	0.038	1e-05
hrq1	hrq1	YMR189W	GCV2		0.76178	0.027	0.99689	0.003	-0.23444	0.027	0.00042	status=JK
hrq1	hrq1	YDL215C	GDH2		1.02227	0.054	0.89961	0.003	0.12311	0.054	4e-05
hrq1	hrq1	YAL062W	GDH3		0.86377	0.036	1.0374	0.067	-0.16088	0.036	0.00057	status=JK
hrq1	hrq1	YBR187W	GDT1		1.10461	0.091	1.01583	0.022	0.08926	0.091	0.00015
hrq1	hrq1	YER083C	GET2		0.98924	0.008	0.91045	0.03	0.08402	0.008	2e-05	status=JK
hrq1	hrq1	YNL153C	GIM3		0.83221	0.16	0.69964	0.137	0.14716	0.16	0.00191
hrq1	hrq1	YDR096W	GIS1		0.98742	0.068	1.09056	0.022	-0.10469	0.068	9e-05
hrq1	hrq1	YMR311C	GLC8		1.08967	0.045	0.99805	0.01	0.08922	0.045	2e-05
hrq1	hrq1	YOR040W	GLO4		1.1196	0.064	1.02615	0.005	0.09213	0.064	5e-05
hrq1	hrq1	YDL171C	GLT1		1.11988	0.037	0.98192	0.043	0.14023	0.037	0.00036	status=JK
hrq1	hrq1	YLR445W	GMC2		1.14463	0.08	1.04382	0.007	0.09867	0.08	9e-05
hrq1	hrq1	YHL031C	GOS1		0.79662	0.109	0.6719	0.088	0.11937	0.109	0.00069
hrq1	hrq1	YDR098C	GRX3		1.02817	0.056	1.1453	0.051	-0.11446	0.056	4e-05
hrq1	hrq1	YMR251W	GTO3		1.14788	0.079	1.07126	0.032	0.08229	0.079	9e-05
hrq1	hrq1	YLL060C	GTT2		1.03969	0.058	0.96031	0.007	0.08146	0.058	5e-05
hrq1	hrq1	YDL238C	GUD1		1.14432	0.017	0.95815	0.018	0.18256	0.017	0
hrq1	hrq1	YMR192W	GYL1		0.81157	0.05	1.02752	0.044	-0.20914	0.05	0.00126	status=JK
hrq1	hrq1	YPL249C	GYP5		0.97358	0.055	1.05515	0.005	-0.08168	0.055	5e-05
hrq1	hrq1	YDL234C	GYP7		1.05698	0.135	0.75529	0.191	0.23958	0.135	0.00057
hrq1	hrq1	YOL089C	HAL9		0.91056	0.08	1.00834	0.005	-0.10028	0.08	0.00019
hrq1	hrq1	YGL237C	HAP2		0.24124	0.077	0.58948	0.332	-0.27627	0.077	0.00808
hrq1	hrq1	YBL021C	HAP3		1.25245	0.713	0.5396	0.375	0.75518	0.713	0.03917	status=CP
hrq1	hrq1	YKL109W	HAP4		1.07476	0.051	0.96284	0.007	0.11385	0.051	3e-05
hrq1	hrq1	YDL223C	HBT1		1.05374	0.003	0.73189	0.081	0.30053	0.003	0	status=JK
hrq1	hrq1	YLR192C	HCR1		0.78586	0.075	0.68136	0.01	0.10445	0.075	0.00023
hrq1	hrq1	YOR227W	HER1		0.90967	0.035	1.00214	0.007	-0.09428	0.035	2e-05
hrq1	hrq1	YMR110C	HFD1		1.16612	0.064	1.0684	0.005	0.09679	0.064	5e-05
hrq1	hrq1	YNL030W	HHF2		1.08109	0.083	0.98416	0.03	0.09867	0.083	0.00012
hrq1	hrq1	YJR140C	HIR3		0.82953	0.026	0.93016	0.007	-0.0992	0.026	0.00033	status=JK
hrq1	hrq1	YDR420W	HKR1		0.9671	0.033	1.04941	0.056	-0.09503	0.033	1e-05
hrq1	hrq1	YBR034C	HMT1		1.0595	0.088	0.95001	0.069	0.11992	0.088	0.00016
hrq1	hrq1	YMR251W-A	HOR7		0.62279	0.074	0.8794	0.054	-0.26642	0.074	0.00046
hrq1	hrq1	YGL194C	HOS2		0.85428	0.03	0.97265	0.008	-0.12184	0.03	1e-05
hrq1	hrq1	YMR172W	HOT1		0.77763	0.104	1.01224	0.059	-0.24762	0.104	0.00065
hrq1	hrq1	YOL013C	HRD1		0.75864	0.374	0.88581	0.054	-0.13852	0.374	0.02702
hrq1	hrq1	YOR267C	HRK1		1.04596	0.045	0.95023	0.006	0.09867	0.045	2e-05
hrq1	hrq1	YMR186W	HSC82		0.6875	0.059	0.99762	0.029	-0.3042	0.059	0.00017
hrq1	hrq1	YCR021C	HSP30		1.12598	0.002	1.0412	0.043	0.09514	0.002	0	status=JK
hrq1	hrq1	YOR025W	HST3		0.86337	0.016	1.02278	0.039	-0.16107	0.016	0.00012	status=JK
hrq1	hrq1	YHR067W	HTD2		0.3409	0.094	0.61509	0.005	-0.27619	0.094	0.0054
hrq1	hrq1	YOL012C	HTZ1		0.7931	0.023	0.89601	0.025	-0.10401	0.023	0.00029	status=JK
hrq1	hrq1	YGL168W	HUR1		0.7912	0.07	0.64332	0.04	0.14556	0.07	0.00259	status=JK
hrq1	hrq1	YFR053C	HXK1		0.92009	0.158	0.9753	0.13	-0.0874	0.157	0.00135
hrq1	hrq1	YGL253W	HXK2		1.00625	0.013	0.9113	0.012	0.09408	0.013	6e-05	status=JK
hrq1	hrq1	YFL011W	HXT10		0.93541	0.103	1.02626	0.051	-0.09004	0.103	0.00037
hrq1	hrq1	YBR157C	ICS2		0.88245	0.116	1.00672	0.031	-0.1314	0.116	0.00062
hrq1	hrq1	YJL077C	ICS3		0.91348	0.068	1.02852	0.016	-0.11617	0.068	0.00012
hrq1	hrq1	YMR195W	ICY1		0.72632	0.174	1.02381	0.02	-0.30133	0.173	0.00358
hrq1	hrq1	YNL037C	IDH1		1.03407	0.057	0.83494	0.005	0.19681	0.057	0.00103	status=JK
hrq1	hrq1	YOR136W	IDH2		0.86383	0.055	0.75991	0.022	0.09974	0.055	7e-05
hrq1	hrq1	YOR189W	IES4		1.17523	0.028	1.04464	0.004	0.13047	0.028	0.00019	status=JK
hrq1	hrq1	YNL157W	IGO1		1.30688	0.035	1.04157	0.051	0.26474	0.035	0.00024	status=JK
hrq1	hrq1	YHR132W-A	IGO2		0.93573	0.066	1.02928	0.059	-0.08448	0.066	0.0001
hrq1	hrq1	YJR094C	IME1		0.87412	0.139	1.03534	0.027	-0.16382	0.139	0.00109
hrq1	hrq1	YJL106W	IME2		0.91315	0.108	1.00754	0.019	-0.09538	0.108	0.00045
hrq1	hrq1	YMR035W	IMP2		1.05695	0.117	0.90309	0.017	0.15192	0.117	0.00037
hrq1	hrq1	YIL154C	IMP2'		0.85515	0.082	0.95095	0.035	-0.09993	0.082	0.00024
hrq1	hrq1	YDL181W	INH1		1.05228	0.105	0.94734	0.022	0.10769	0.105	0.00027
hrq1	hrq1	YDR123C	INO2		0.65103	0.056	0.78296	0.042	-0.13361	0.056	0.00017
hrq1	hrq1	YOL108C	INO4		0.37103	0.055	0.55145	0.043	-0.189	0.055	0.00088
hrq1	hrq1	YMR204C	INP1		0.41392	0.112	0.86912	0.045	-0.44628	0.112	0.00516
hrq1	hrq1	YFR013W	IOC3		0.85765	0.138	1.0141	0.061	-0.15693	0.138	0.00112
hrq1	hrq1	YMR044W	IOC4		1.28193	0.088	1.07268	0.012	0.20675	0.088	9e-05
hrq1	hrq1	YDR072C	IPT1		1.13736	0.072	0.9687	0.062	0.17056	0.071	7e-05
hrq1	hrq1	YOL081W	IRA2		0.64328	0.249	0.8714	0.063	-0.22268	0.249	0.01413
hrq1	hrq1	YMR073C	IRC21		1.23113	0.139	0.95752	0.049	0.28105	0.139	0.0004
hrq1	hrq1	YFR055W	IRC7		1.09809	0.027	1.0187	0.018	0.0815	0.027	0.0002	status=JK
hrq1	hrq1	YDR492W	IZH1		1.1326	0.027	1.02512	0.025	0.11264	0.027	0.00018	status=JK
hrq1	hrq1	YMR132C	JLP2		0.89979	0.089	1.0233	0.053	-0.12311	0.089	0.00027
hrq1	hrq1	YGL241W	KAP114		0.63619	0.217	1.00206	0.155	-0.39908	0.217	0.00992
hrq1	hrq1	YGL016W	KAP122		1.0252	0.024	0.94527	0.011	0.08045	0.024	0
hrq1	hrq1	YMR065W	KAR5		0.93878	0.157	0.7873	0.055	0.15906	0.157	0.00125
hrq1	hrq1	YPL269W	KAR9		1.11593	0.057	1.03384	0.011	0.0819	0.056	4e-05
hrq1	hrq1	YJR054W	KCH1		0.52411	0.089	0.26072	0.083	0.23817	0.088	0.00938	status=JK
hrq1	hrq1	YGR238C	KEL2		0.68304	0.063	0.94829	0.064	-0.27745	0.063	0.00286	status=JK
hrq1	hrq1	YJL094C	KHA1		0.9493	0.008	1.0348	0.051	-0.0811	0.008	2e-05	status=JK
hrq1	hrq1	YDR122W	KIN1		1.05138	0.084	1.19897	0.014	-0.14543	0.084	0.00014
hrq1	hrq1	YBL063W	KIP1		0.99266	0.012	1.09761	0.016	-0.10387	0.012	5e-05	status=JK
hrq1	hrq1	YPL053C	KTR6		1.08243	0.038	1.00031	0.015	0.08566	0.038	0.00041	status=JK
hrq1	hrq1	YJL207C	LAA1		0.79508	0.056	1.0106	0.039	-0.21211	0.055	9e-05
hrq1	hrq1	YHL003C	LAG1		0.90646	0.104	0.98428	0.056	-0.08033	0.104	0.00041
hrq1	hrq1	YNL045W	LAP2		1.27366	0.189	1.03632	0.047	0.24899	0.189	0.00088
hrq1	hrq1	YPL213W	LEA1		0.85283	0.044	0.74691	0.051	0.09606	0.044	4e-05
hrq1	hrq1	YPL055C	LGE1		0.66026	0.035	0.79386	0.024	-0.12708	0.035	4e-05
hrq1	hrq1	YKL205W	LOS1		0.89922	0.103	1.01626	0.028	-0.12577	0.103	0.00041
hrq1	hrq1	YDR503C	LPP1		0.7361	0.346	0.96568	0.118	-0.22513	0.346	0.02376
hrq1	hrq1	YDL240W	LRG1		1.04303	0.011	0.85989	0.027	0.17888	0.011	4e-05	status=JK
hrq1	hrq1	YHR081W	LRP1		0.7487	0.125	0.8568	0.053	-0.11337	0.125	0.00125
hrq1	hrq1	YAL024C	LTE1		0.88012	0.019	0.97879	0.033	-0.10631	0.019	0.00016	status=JK
hrq1	hrq1	YMR021C	MAC1		1.02758	0.081	0.86301	0.051	0.17495	0.081	0.00014
hrq1	hrq1	YDR005C	MAF1		0.77344	0.041	0.92094	0.024	-0.14368	0.041	0.00095	status=JK
hrq1	hrq1	YBR185C	MBA1		1.11107	0.111	0.93262	0.127	0.20565	0.11	0.00328	status=JK
hrq1	hrq1	YKL093W	MBR1		0.76567	0.216	0.49767	0.213	0.27001	0.216	0.00575
hrq1	hrq1	YOR306C	MCH5		0.92205	0.026	1.04487	0.033	-0.11512	0.026	0.00026	status=JK
hrq1	hrq1	YBR227C	MCX1		1.04289	0.034	0.94841	0.067	0.08037	0.034	0.00036	status=JK
hrq1	hrq1	YKL085W	MDH1		0.7326	0.108	0.98891	0.046	-0.2548	0.108	0.00086
hrq1	hrq1	YDL078C	MDH3		1.13908	0.006	0.94537	0.114	0.16694	0.006	1e-05	status=JK
hrq1	hrq1	YPL270W	MDL2		0.94397	0.077	1.00527	0.077	-0.10372	0.077	0.00015
hrq1	hrq1	YGL197W	MDS3		1.10213	0.009	1.00589	0.011	0.09098	0.009	2e-05	status=JK
hrq1	hrq1	YDL233W	MFG1		0.98026	0.092	0.69425	0.029	0.27026	0.092	0.00023
hrq1	hrq1	YJR008W	MHO1		0.95008	0.013	1.03701	0.028	-0.09289	0.013	6e-05	status=JK
hrq1	hrq1	YBL107C	MIC23		1.0517	0.037	0.97267	0.023	0.0873	0.037	1e-05
hrq1	hrq1	YGL035C	MIG1		0.91138	0.113	0.99335	0.022	-0.08286	0.113	0.00052
hrq1	hrq1	YJR077C	MIR1		0.28521	0.024	0.15704	0.016	0.12191	0.024	0.00228	status=JK
hrq1	hrq1	YNL076W	MKS1		0.84546	0.009	0.72134	0.005	0.12391	0.009	4e-05	status=JK
hrq1	hrq1	YMR167W	MLH1		0.68846	0.042	0.9001	0.034	-0.20123	0.042	0.00126	status=JK
hrq1	hrq1	YLR190W	MMR1		0.96411	0.022	0.8069	0.011	0.15711	0.022	0.00017	status=JK
hrq1	hrq1	YGL087C	MMS2		1.13125	0.12	1.04162	0.026	0.08874	0.12	0.00033
hrq1	hrq1	YBR098W	MMS4		0.58679	0.048	0.98788	0.073	-0.40424	0.048	0.00015
hrq1	hrq1	YMR177W	MMT1		0.92274	0.057	1.04898	0.007	-0.12631	0.056	6e-05
hrq1	hrq1	YMR070W	MOT3		1.06766	0.073	0.99147	0.033	0.08103	0.073	9e-05
hrq1	hrq1	YCL061C	MRC1		0.6147	0.069	0.95593	0.01	-0.34387	0.068	0.00038
hrq1	hrq1	YDL079C	MRK1		1.08569	0.148	0.96824	0.016	0.11929	0.148	0.00611	status=JK
hrq1	hrq1	YKL167C	MRP49		1.07326	0.009	0.9738	0.014	0.0967	0.009	2e-05	status=JK
hrq1	hrq1	YBR122C	MRPL36		1.2185	0.008	1.01527	0.014	0.19618	0.008	2e-05	status=JK
hrq1	hrq1	YMR188C	MRPS17		0.79828	0.014	0.99489	0.031	-0.18952	0.014	0
hrq1	hrq1	YOR334W	MRS2		1.09579	0.083	0.99036	0.012	0.10674	0.083	0.00012
hrq1	hrq1	YML128C	MSC1		1.09044	0.056	0.95202	0.039	0.1442	0.056	4e-05
hrq1	hrq1	YOL090W	MSH2		0.81574	0.027	0.8953	0.043	-0.08617	0.027	1e-05
hrq1	hrq1	YMR037C	MSN2		0.84268	0.129	0.9858	0.011	-0.14703	0.128	0.00096
hrq1	hrq1	YNR049C	MSO1		1.10613	0.069	0.96412	0.005	0.13962	0.069	7e-05
hrq1	hrq1	YMR164C	MSS11		0.78787	0.119	0.98557	0.018	-0.19383	0.119	0.00094
hrq1	hrq1	YDR128W	MTC5		0.77574	0.069	0.94763	0.012	-0.17273	0.069	0.00019
hrq1	hrq1	YNL063W	MTQ1		1.06506	0.033	0.98874	0.056	0.08387	0.033	1e-05
hrq1	hrq1	YMR100W	MUB1		1.06883	0.011	0.85156	0.029	0.21874	0.011	3e-05	status=JK
hrq1	hrq1	YBR119W	MUD1		1.01484	0.056	0.92453	0.095	0.10793	0.056	5e-05
hrq1	hrq1	YHL036W	MUP3		0.89084	0.477	0.74232	0.344	0.1424	0.476	0.03337
hrq1	hrq1	YDR386W	MUS81		0.29074	0.031	1.01758	0.05	-0.7309	0.031	0.00381	status=JK
hrq1	hrq1	YMR109W	MYO5		1.22313	0.012	1.02804	0.019	0.19833	0.012	3e-05	status=JK
hrq1	hrq1	YDR493W	MZM1		1.1147	0.052	0.99407	0.02	0.11283	0.052	3e-05
hrq1	hrq1	YMR080C	NAM7		1.21752	0.06	1.03188	0.054	0.18357	0.06	3e-05
hrq1	hrq1	YDR162C	NBP2		0.95603	0.031	0.81748	0.028	0.14043	0.031	1e-05
hrq1	hrq1	YOR156C	NFI1		0.92341	0.048	1.02263	0.03	-0.10118	0.048	4e-05
hrq1	hrq1	YML118W	NGL3		1.06954	0.059	0.97721	0.01	0.08891	0.059	5e-05
hrq1	hrq1	YBR212W	NGR1		1.13298	0.031	1.02786	0.049	0.11574	0.031	0.00025	status=JK
hrq1	hrq1	YLR351C	NIT3		0.91373	0.187	1.02321	0.027	-0.10528	0.187	0.00227
hrq1	hrq1	YGR089W	NNF2		1.09752	0.08	1.01515	0.033	0.08537	0.08	0.00011
hrq1	hrq1	YOL041C	NOP12		0.48785	0.073	0.58542	0.017	-0.10298	0.073	0.00091
hrq1	hrq1	YDL213C	NOP6		0.98723	0.031	0.85476	0.038	0.14217	0.031	1e-05
hrq1	hrq1	YBR170C	NPL4		0.57978	0.18	0.78227	0.053	-0.21364	0.18	0.00759
hrq1	hrq1	YHL023C	NPR3		0.98775	0.013	0.89168	0.014	0.09796	0.013	6e-05	status=JK
hrq1	hrq1	YNL156C	NSG2		1.1075	0.055	0.98531	0.039	0.11872	0.055	3e-05
hrq1	hrq1	YDR001C	NTH1		0.82353	0.045	1.05454	0.006	-0.23087	0.045	4e-05
hrq1	hrq1	YKR082W	NUP133		0.56738	0.121	0.77432	0.068	-0.19433	0.121	0.00255
hrq1	hrq1	YBL079W	NUP170		0.67099	0.244	0.79017	0.08	-0.1155	0.244	0.01181
hrq1	hrq1	YMR153W	NUP53		0.90948	0.082	1.01564	0.038	-0.10572	0.082	0.0002
hrq1	hrq1	YNL099C	OCA1		0.91297	0.109	0.98217	0.056	-0.08764	0.109	0.00047
hrq1	hrq1	YNL056W	OCA2		1.17772	0.153	0.98478	0.015	0.18472	0.153	0.00059
hrq1	hrq1	YHL029C	OCA5		0.49287	0.164	0.89501	0.064	-0.39109	0.164	0.00926
hrq1	hrq1	YHL020C	OPI1		0.9113	0.033	0.74619	0.014	0.16738	0.033	0.00045	status=JK
hrq1	hrq1	YPR194C	OPT2		0.84267	0.014	0.96923	0.08	-0.11904	0.014	0.0001	status=JK
hrq1	hrq1	YOR085W	OST3		0.95771	0.086	0.83919	0.032	0.12045	0.086	0.0002
hrq1	hrq1	YDL232W	OST4		0.42975	0.045	0.2021	0.055	0.21985	0.045	0.00372	status=JK
hrq1	hrq1	YMR148W	OSW5		0.8647	0.051	0.95831	0.032	-0.10424	0.051	6e-05
hrq1	hrq1	YFL044C	OTU1		1.09162	0.009	1.01356	0.006	0.0805	0.009	2e-05	status=JK
hrq1	hrq1	YOR269W	PAC1		0.84805	0.136	0.98044	0.007	-0.13573	0.136	0.0011
hrq1	hrq1	YDR538W	PAD1		0.9352	0.08	1.02466	0.057	-0.09859	0.08	0.00017
hrq1	hrq1	YMR165C	PAH1		0.63879	0.05	0.83915	0.126	-0.16164	0.05	0.00205	status=JK
hrq1	hrq1	YKR065C	PAM17		0.60566	0.196	0.98313	0.037	-0.35895	0.195	0.00848
hrq1	hrq1	YGL094C	PAN2		0.92932	0.129	1.02417	0.042	-0.1048	0.129	0.00073
hrq1	hrq1	YKL025C	PAN3		0.93889	0.024	1.0415	0.026	-0.10155	0.024	0
hrq1	hrq1	YCR077C	PAT1		0.56472	0.124	0.84239	0.013	-0.28165	0.123	0.00277
hrq1	hrq1	YBR233W	PBP2		0.83715	0.093	1.00138	0.017	-0.16611	0.093	0.00038
hrq1	hrq1	YBR094W	PBY1		0.6004	0.053	1.00775	0.006	-0.40415	0.053	0.00019
hrq1	hrq1	YDL179W	PCL9		0.95543	0.033	1.02519	0.036	-0.08027	0.033	1e-05
hrq1	hrq1	YGR101W	PCP1		0.93357	0.035	0.77184	0.016	0.15862	0.035	1e-05
hrq1	hrq1	YER178W	PDA1		0.87404	0.029	0.77845	0.011	0.09895	0.029	0.00036	status=JK
hrq1	hrq1	YGL248W	PDE1		1.07163	0.018	0.94994	0.058	0.12454	0.018	0
hrq1	hrq1	YOR360C	PDE2		0.76851	0.12	0.92743	0.034	-0.15756	0.12	0.00103
hrq1	hrq1	YDR406W	PDR15		1.09575	0.023	1.01438	0.031	0.08167	0.023	0
hrq1	hrq1	YOR017W	PET127		0.56567	0.017	0.74099	0.013	-0.1819	0.017	1e-05
hrq1	hrq1	YCR020C	PET18		1.10176	0.066	1.01421	0.03	0.09186	0.066	6e-05
hrq1	hrq1	YJR034W	PET191		0.95796	0.019	1.03056	0.032	-0.08156	0.019	0
hrq1	hrq1	YNR045W	PET494		0.95621	0.118	1.02946	0.014	-0.08187	0.118	0.00051
hrq1	hrq1	YJL210W	PEX2		1.03785	0.06	0.9091	0.007	0.12744	0.06	5e-05
hrq1	hrq1	YHR150W	PEX28		1.09008	0.063	0.98958	0.047	0.09014	0.063	5e-05
hrq1	hrq1	YBR168W	PEX32		0.71867	0.057	0.84878	0.065	-0.14133	0.057	0.00014
hrq1	hrq1	YGR133W	PEX4		1.09742	0.044	0.97658	0.03	0.12105	0.044	2e-05
hrq1	hrq1	YGR077C	PEX8		0.97579	0.043	0.89687	0.035	0.08769	0.043	2e-05
hrq1	hrq1	YMR205C	PFK2		0.56011	0.177	0.81889	0.104	-0.27827	0.177	0.00796
hrq1	hrq1	YMR105C	PGM2		1.07605	0.096	0.99686	0.015	0.08208	0.096	0.00019
hrq1	hrq1	YKL043W	PHD1		1.18695	0.076	1.03388	0.019	0.14231	0.076	7e-05
hrq1	hrq1	YDL236W	PHO13		1.02315	0.101	0.79922	0.018	0.22446	0.101	0.00026
hrq1	hrq1	YDL106C	PHO2		0.8975	0.024	0.98125	0.029	-0.08176	0.024	0.00024	status=JK
hrq1	hrq1	YBR093C	PHO5		0.70125	0.012	0.9307	0.017	-0.2292	0.012	0.0001	status=JK
hrq1	hrq1	YJL198W	PHO90		1.07891	0.033	0.9944	0.017	0.08111	0.033	1e-05
hrq1	hrq1	YNR013C	PHO91		1.06928	0.048	0.98255	0.017	0.08394	0.048	2e-05
hrq1	hrq1	YGL023C	PIB2		0.91553	0.046	0.99476	0.038	-0.08354	0.046	3e-05
hrq1	hrq1	YHR034C	PIH1		0.84803	0.055	0.92823	0.014	-0.08292	0.055	7e-05
hrq1	hrq1	YMR123W	PKR1		1.01439	0.047	0.86114	0.012	0.14983	0.047	0.00072	status=JK
hrq1	hrq1	YMR008C	PLB1		1.13555	0.079	1.0354	0.004	0.0986	0.079	9e-05
hrq1	hrq1	YMR006C	PLB2		1.09581	0.046	1.01489	0.009	0.08118	0.046	2e-05
hrq1	hrq1	YPL036W	PMA2		0.72216	0.121	0.94725	0.057	-0.2074	0.121	0.00128
hrq1	hrq1	YGL167C	PMR1		0.90501	0.064	0.73758	0.032	0.16141	0.064	0.0001
hrq1	hrq1	YGL037C	PNC1		0.93605	0.086	1.0306	0.015	-0.10084	0.086	0.00022
hrq1	hrq1	YLR209C	PNP1		0.86842	0.103	0.96485	0.077	-0.10527	0.103	0.00045
hrq1	hrq1	YPL144W	POC4		0.92009	0.052	0.80271	0.092	0.10506	0.052	5e-05
hrq1	hrq1	YJR043C	POL32		0.61179	0.093	0.91502	0.017	-0.30014	0.093	0.00094
hrq1	hrq1	YDL134C	PPH21		1.09258	0.05	0.95714	0.001	0.13433	0.05	0.00069	status=JK
hrq1	hrq1	YDR075W	PPH3		0.93174	0.042	1.03004	0.008	-0.10053	0.042	0.00067	status=JK
hrq1	hrq1	YOL141W	PPM2		0.85729	0.048	1.02746	0.102	-0.19414	0.048	0.00105	status=JK
hrq1	hrq1	YPL179W	PPQ1		1.0437	0.029	0.93226	0.018	0.11349	0.029	0.00026	status=JK
hrq1	hrq1	YLR014C	PPR1		1.09882	0.055	1.00894	0.016	0.09228	0.055	3e-05
hrq1	hrq1	YMR297W	PRC1		1.22322	0.078	1.04517	0.07	0.18447	0.078	7e-05
hrq1	hrq1	YML047C	PRM6		0.87593	0.032	1.06602	0.008	-0.18976	0.032	0.00046	status=JK
hrq1	hrq1	YDL039C	PRM7		1.02352	0.015	1.10744	0.028	-0.08511	0.015	0
hrq1	hrq1	YBL064C	PRX1		0.95106	0.084	0.8516	0.111	0.09677	0.084	0.00019
hrq1	hrq1	YOL054W	PSH1		0.88053	0.011	1.0146	0.044	-0.12955	0.011	5e-05	status=JK
hrq1	hrq1	YLR376C	PSY3		1.22213	0.024	0.98937	0.012	0.23419	0.024	0.00013	status=JK
hrq1	hrq1	YJR059W	PTK2		0.90161	0.085	1.02866	0.016	-0.1269	0.085	0.00023
hrq1	hrq1	YKL039W	PTM1		0.96677	0.015	1.0489	0.045	-0.09127	0.015	0
hrq1	hrq1	YDL230W	PTP1		1.08165	0.046	0.64156	0.063	0.45496	0.046	2e-05
hrq1	hrq1	YKR093W	PTR2		1.0761	0.012	0.98334	0.04	0.08854	0.012	4e-05	status=JK
hrq1	hrq1	YDR496C	PUF6		0.75482	0.086	0.86544	0.007	-0.11036	0.086	0.00433	status=JK
hrq1	hrq1	YLR142W	PUT1		1.0924	0.026	0.99839	0.038	0.09736	0.026	0
hrq1	hrq1	YOR347C	PYK2		0.91893	0.093	1.00915	0.017	-0.08601	0.093	0.00029
hrq1	hrq1	YDL104C	QRI7		1.10573	0.025	0.97459	0.006	0.13242	0.025	0
hrq1	hrq1	YPL022W	RAD1		0.68552	0.063	0.90765	0.067	-0.24316	0.063	0.00021
hrq1	hrq1	YML095C	RAD10		0.95119	0.076	1.04232	0.021	-0.09798	0.076	0.00014
hrq1	hrq1	YKL113C	RAD27		0.60216	0.04	0.86131	0.002	-0.26096	0.04	8e-05
hrq1	hrq1	YER162C	RAD4		0.1819	0.047	0.48775	0.4	-0.21802	0.047	0.02175	status=JK
hrq1	hrq1	YER095W	RAD51		1.02474	0.015	0.90076	0.019	0.12677	0.015	7e-05	status=JK
hrq1	hrq1	YML032C	RAD52		1.01283	0.022	0.76389	0.022	0.249	0.022	0
hrq1	hrq1	YGL163C	RAD54		1.04823	0.054	0.80779	0.096	0.21513	0.053	4e-05
hrq1	hrq1	YDR076W	RAD55		1.11166	0.05	0.92649	0.008	0.18057	0.05	2e-05
hrq1	hrq1	YDR004W	RAD57		1.1194	0.076	0.95436	0.01	0.16193	0.076	8e-05
hrq1	hrq1	YML030W	RCF1		1.08351	0.031	0.96947	0.043	0.11879	0.031	1e-05
hrq1	hrq1	YMR075W	RCO1		1.17822	0.083	0.98964	0.007	0.18987	0.083	0.0001
hrq1	hrq1	YMR133W	REC114		1.06396	0.066	0.98195	0.019	0.08017	0.066	7e-05
hrq1	hrq1	YBR050C	REG2		0.86841	0.08	0.97926	0.061	-0.12047	0.08	0.00021
hrq1	hrq1	YPL167C	REV3		0.88299	0.13	0.97927	0.033	-0.09383	0.13	0.00085
hrq1	hrq1	YOL080C	REX4		1.07829	0.087	0.98491	0.056	0.10123	0.087	0.00014
hrq1	hrq1	YMR182C	RGM1		0.70899	0.032	1.03114	0.053	-0.3223	0.032	0.00068	status=JK
hrq1	hrq1	YNL090W	RHO2		1.15805	0.051	1.02931	0.018	0.12962	0.051	2e-05
hrq1	hrq1	YLR453C	RIF2		1.15618	0.062	1.03381	0.045	0.12605	0.061	4e-05
hrq1	hrq1	YMR154C	RIM13		0.75266	0.188	0.89042	0.029	-0.13431	0.188	0.00408
hrq1	hrq1	YOR275C	RIM20		0.9849	0.067	0.90236	0.031	0.08169	0.067	8e-05
hrq1	hrq1	YMR063W	RIM9		1.13763	0.113	0.86099	0.033	0.27983	0.113	0.00027
hrq1	hrq1	YMR283C	RIT1		0.7788	0.086	1.08757	0.004	-0.30716	0.086	0.00037
hrq1	hrq1	YGR044C	RME1		0.92777	0.047	1.02046	0.005	-0.09177	0.047	4e-05
hrq1	hrq1	YGL250W	RMR1		0.81536	0.05	0.93422	0.011	-0.12117	0.05	6e-05
hrq1	hrq1	YMR234W	RNH1		1.15099	0.074	1.03835	0.04	0.11461	0.074	7e-05
hrq1	hrq1	YNL072W	RNH201		0.24444	0.115	0.50779	0.408	-0.22797	0.115	0.02404
hrq1	hrq1	YLR154C	RNH203		0.6292	0.025	1.0058	0.042	-0.37075	0.025	2e-05
hrq1	hrq1	YMR258C	ROY1		0.65281	0.15	1.0107	0.099	-0.35734	0.15	0.00321
hrq1	hrq1	YJL148W	RPA34		0.67535	0.029	0.8476	0.005	-0.17175	0.029	2e-05
hrq1	hrq1	YIL119C	RPI1		0.9387	0.034	1.01138	0.03	-0.08559	0.034	1e-05
hrq1	hrq1	YDL082W	RPL13A		0.84291	0.144	0.62245	0.145	0.25102	0.144	0.00135
hrq1	hrq1	YIL133C	RPL16A		0.99299	0.149	0.87319	0.047	0.13127	0.149	0.00091
hrq1	hrq1	YBR084C-A	RPL19A		1.00836	0.019	0.89593	0.006	0.11635	0.019	0
hrq1	hrq1	YBL027W	RPL19B		0.44642	0.136	0.76213	0.036	-0.31672	0.136	0.02958	status=JK
hrq1	hrq1	YOR312C	RPL20B		1.01922	0.074	0.79191	0.019	0.23386	0.074	0.0001
hrq1	hrq1	YBL087C	RPL23A		0.9545	0.076	0.8263	0.036	0.12474	0.076	0.00014
hrq1	hrq1	YDR471W	RPL27B		0.9523	0.028	0.86422	0.029	0.08812	0.028	1e-05
hrq1	hrq1	YMR194W	RPL36A		0.66122	0.106	0.89039	0.033	-0.23333	0.106	0.00112
hrq1	hrq1	YLR185W	RPL37A		0.89978	0.26	0.69124	0.119	0.22838	0.26	0.00621
hrq1	hrq1	YDR500C	RPL37B		0.10767	0.016	0.38976	0.005	-0.2833	0.016	0.00767	status=JK
hrq1	hrq1	YPR043W	RPL43A		0.70916	0.013	0.79498	0.018	-0.09027	0.013	0
hrq1	hrq1	YLR448W	RPL6B		1.02744	0.068	0.76106	0.209	0.2212	0.068	0.00147	status=JK
hrq1	hrq1	YNL067W	RPL9B		1.09131	0.011	0.9484	0.024	0.14378	0.011	4e-05	status=JK
hrq1	hrq1	YDL020C	RPN4		0.86064	0.028	0.77854	0.014	0.0808	0.028	0.00034	status=JK
hrq1	hrq1	YFL036W	RPO41		0.57443	0.175	0.20411	0.01	0.37375	0.175	0.00721
hrq1	hrq1	YDL130W	RPP1B		1.05143	0.043	0.93903	0.027	0.11503	0.043	2e-05
hrq1	hrq1	YOL039W	RPP2A		1.08581	0.023	0.97988	0.031	0.10973	0.023	0.00015	status=JK
hrq1	hrq1	YOR293W	RPS10A		0.93653	0.011	0.72711	0.024	0.20453	0.011	5e-05	status=JK
hrq1	hrq1	YMR230W	RPS10B		0.96224	0.049	0.8278	0.006	0.13592	0.049	4e-05
hrq1	hrq1	YCR031C	RPS14A		0.96213	0.06	0.83979	0.027	0.12783	0.06	7e-05
hrq1	hrq1	YJL136C	RPS21B		0.72243	0.118	0.80708	0.047	-0.09158	0.118	0.00116
hrq1	hrq1	YHR021C	RPS27B		0.40934	0.1	0.66925	0.025	-0.26059	0.1	0.00377
hrq1	hrq1	YLR388W	RPS29A		0.9091	0.058	0.81781	0.011	0.09137	0.058	7e-05
hrq1	hrq1	YBR181C	RPS6B		0.59407	0.048	0.72961	0.032	-0.13215	0.048	0.00014
hrq1	hrq1	YBL072C	RPS8A		0.43011	0.133	0.75923	0.035	-0.33901	0.133	0.00756
hrq1	hrq1	YPL152W	RRD2		1.08973	0.069	0.9622	0.019	0.12232	0.069	7e-05
hrq1	hrq1	YDL216C	RRI1		1.08966	0.028	0.77502	0.038	0.31701	0.028	0.00022	status=JK
hrq1	hrq1	YHR031C	RRM3		0.4392	0.007	0.99428	0.035	-0.55283	0.007	0
hrq1	hrq1	YGL146C	RRT6		0.77059	0.067	0.93385	0.021	-0.16537	0.067	0.00018
hrq1	hrq1	YMR266W	RSN1		0.83942	0.048	0.99914	0.005	-0.15946	0.048	5e-05
hrq1	hrq1	YBR147W	RTC2		0.98292	0.163	1.07262	0.013	-0.09207	0.162	0.00122
hrq1	hrq1	YOR014W	RTS1		1.01228	0.096	0.86702	0.013	0.14026	0.096	0.00024
hrq1	hrq1	YHR154W	RTT107		0.70897	0.063	0.96229	0.054	-0.25772	0.063	0.00019
hrq1	hrq1	YDR139C	RUB1		0.83885	0.041	0.98321	0.023	-0.14387	0.041	3e-05
hrq1	hrq1	YKL212W	SAC1		0.29473	0.144	0.38643	0.08	-0.08521	0.144	0.02632
hrq1	hrq1	YGL175C	SAE2		0.67779	0.026	0.99669	0.012	-0.31949	0.026	0.00049	status=JK
hrq1	hrq1	YLR180W	SAM1		0.98191	0.145	0.78337	0.046	0.21597	0.145	0.00087
hrq1	hrq1	YMR060C	SAM37		1.0754	0.054	0.99182	0.021	0.08686	0.054	4e-05
hrq1	hrq1	YKR028W	SAP190		0.79254	0.149	1.00665	0.02	-0.22089	0.149	0.00177
hrq1	hrq1	YMR263W	SAP30		0.86581	0.048	1.06213	0.047	-0.19641	0.048	5e-05
hrq1	hrq1	YDR181C	SAS4		0.95232	0.17	1.07977	0.02	-0.13572	0.17	0.00152
hrq1	hrq1	YER120W	SCS2		0.72335	0.013	0.85797	0.046	-0.13399	0.013	0.0001	status=JK
hrq1	hrq1	YMR305C	SCW10		0.91447	0.036	0.99679	0.019	-0.08802	0.036	2e-05
hrq1	hrq1	YDR469W	SDC1		0.7917	0.091	0.91074	0.026	-0.12351	0.091	0.00041
hrq1	hrq1	YLL041C	SDH2		0.74385	0.342	0.51896	0.208	0.24004	0.342	0.02248
hrq1	hrq1	YIL113W	SDP1		0.94015	0.141	1.03239	0.031	-0.10702	0.141	0.0009
hrq1	hrq1	YLR268W	SEC22		0.89069	0.008	1.00104	0.007	-0.11302	0.008	2e-05	status=JK
hrq1	hrq1	YMR086W	SEG1		1.25169	0.04	1.04043	0.025	0.20554	0.04	1e-05
hrq1	hrq1	YKR029C	SET3		0.85226	0.016	0.99958	0.033	-0.14279	0.016	0
hrq1	hrq1	YJL145W	SFH5		0.95111	0.065	1.03434	0.015	-0.08504	0.065	9e-05
hrq1	hrq1	YMR190C	SGS1		0.57319	0.107	0.93548	0.04	-0.36974	0.107	0.00175
hrq1	hrq1	YBL031W	SHE1		0.12027	0.009	0.59598	0.559	-0.33637	0.009	0.00195	status=JK
hrq1	hrq1	YGL228W	SHE10		1.13145	0.184	1.02419	0.049	0.11554	0.184	0.00117
hrq1	hrq1	YDR393W	SHE9		0.98907	0.003	0.91063	0.019	0.08013	0.003	0	status=JK
hrq1	hrq1	YHL006C	SHU1		1.24884	0.085	1.04269	0.015	0.20417	0.085	9e-05
hrq1	hrq1	YLR079W	SIC1		0.43861	0.082	0.65638	0.023	-0.21347	0.082	0.00177
hrq1	hrq1	YBR103W	SIF2		0.80434	0.062	0.9329	0.026	-0.1286	0.062	0.00013
hrq1	hrq1	YMR175W	SIP18		0.85251	0.008	0.99593	0.019	-0.14394	0.008	3e-05	status=JK
hrq1	hrq1	YJL089W	SIP4		1.09649	0.058	0.95939	0.019	0.13923	0.058	4e-05
hrq1	hrq1	YMR140W	SIP5		0.89979	0.067	1.06066	0.036	-0.16852	0.067	0.00011
hrq1	hrq1	YPL026C	SKS1		1.09505	0.002	0.9803	0.029	0.1153	0.002	0	status=JK
hrq1	hrq1	YBL007C	SLA1		1.0161	0.046	0.90204	0.057	0.13049	0.046	3e-05
hrq1	hrq1	YOR008C	SLG1		0.88443	0.019	0.80942	0.027	0.08221	0.019	0.00016	status=JK
hrq1	hrq1	YGR212W	SLI1		1.01877	0.082	1.10916	0.028	-0.08653	0.082	0.00014
hrq1	hrq1	YDL033C	SLM3		1.01606	0.005	0.88769	0.023	0.12456	0.005	1e-05	status=JK
hrq1	hrq1	YBR077C	SLM4		1.15092	0.054	1.04737	0.011	0.0977	0.054	3e-05
hrq1	hrq1	YHR030C	SLT2		1.02171	0.079	0.91082	0.007	0.11152	0.079	0.00013
hrq1	hrq1	YBR228W	SLX1		0.48055	0.088	1.04613	0.021	-0.56111	0.088	0.00164
hrq1	hrq1	YLR135W	SLX4		0.54177	0.05	0.97858	0.03	-0.43511	0.05	0.00021
hrq1	hrq1	YDL013W	SLX5		0.13789	0.005	0.48716	0.035	-0.35898	0.005	0.0004	status=JK
hrq1	hrq1	YER116C	SLX8		0.2472	0.016	0.69712	0.023	-0.45558	0.016	7e-05
hrq1	hrq1	YML066C	SMA2		0.33367	0.168	0.53418	0.138	-0.22341	0.168	0.02852
hrq1	hrq1	YML058W	SML1		1.08483	0.038	0.99882	0.031	0.08164	0.038	0.0004	status=JK
hrq1	hrq1	YBR182C	SMP1		1.08768	0.025	1.00321	0.057	0.09687	0.025	0
hrq1	hrq1	YBR289W	SNF5		0.26393	0.043	0.50655	0.064	-0.25142	0.043	0.00118
hrq1	hrq1	YMR095C	SNO1		1.10256	0.088	1.02943	0.041	0.08249	0.088	0.00014
hrq1	hrq1	YDR011W	SNQ2		0.93013	0.099	1.03213	0.012	-0.10537	0.099	0.00375	status=JK
hrq1	hrq1	YCR033W	SNT1		0.87951	0.019	0.96321	0.004	-0.08251	0.019	0.00016	status=JK
hrq1	hrq1	YGL131C	SNT2		1.11896	0.045	1.03755	0.018	0.08235	0.045	0.00053	status=JK
hrq1	hrq1	YOR308C	SNU66		1.03876	0.017	0.95823	0.038	0.0815	0.017	9e-05	status=JK
hrq1	hrq1	YMR096W	SNZ1		1.21031	0.07	0.95388	0.009	0.25771	0.07	5e-05
hrq1	hrq1	YHR008C	SOD2		0.6273	0.1	0.58192	0.189	0.0853	0.1	0.00108
hrq1	hrq1	YKL184W	SPE1		0.71737	0.023	0.60745	0.057	0.10749	0.023	1e-05
hrq1	hrq1	YOL052C	SPE2		0.84933	0.053	0.75348	0.004	0.09703	0.052	6e-05
hrq1	hrq1	YPR069C	SPE3		0.91329	0.021	0.8012	0.024	0.10884	0.021	0
hrq1	hrq1	YMR107W	SPG4		1.20604	0.113	1.02161	0.03	0.18414	0.113	0.00022
hrq1	hrq1	YMR191W	SPG5		0.81296	0.091	1.05869	0.005	-0.24279	0.091	0.00038
hrq1	hrq1	YHR153C	SPO16		0.44726	0.004	0.28528	0.043	0.17924	0.004	2e-05	status=JK
hrq1	hrq1	YMR017W	SPO20		0.79984	0.298	1.00313	0.017	-0.19688	0.298	0.01264
hrq1	hrq1	YGL170C	SPO74		0.97656	0.13	0.84027	0.112	0.1176	0.13	0.00063
hrq1	hrq1	YOR313C	SPS4		0.57807	0.053	0.6805	0.001	-0.10259	0.053	0.00021
hrq1	hrq1	YER161C	SPT2		0.80855	0.04	0.94391	0.039	-0.12881	0.04	0.00081	status=JK
hrq1	hrq1	YMR179W	SPT21		0.47307	0.158	0.78764	0.078	-0.30152	0.158	0.00936
hrq1	hrq1	YLR055C	SPT8		0.87113	0.006	0.9651	0.025	-0.09364	0.006	1e-05	status=JK
hrq1	hrq1	YHR041C	SRB2		0.47499	0.073	0.77423	0.047	-0.29541	0.073	0.00097
hrq1	hrq1	YCL037C	SRO9		0.95135	0.107	0.86631	0.022	0.08065	0.107	0.00422	status=JK
hrq1	hrq1	YJL092W	SRS2		0.55205	0.097	0.94058	0.026	-0.39442	0.097	0.00145
hrq1	hrq1	YMR101C	SRT1		1.29555	0.015	1.0353	0.021	0.2658	0.015	5e-05	status=JK
hrq1	hrq1	YKL086W	SRX1		0.92296	0.099	1.00904	0.03	-0.08917	0.099	0.00034
hrq1	hrq1	YDL229W	SSB1		0.95379	0.024	0.38697	0.044	0.56969	0.024	0
hrq1	hrq1	YMR183C	SSO2		0.84729	0.049	1.00538	0.051	-0.15781	0.049	5e-05
hrq1	hrq1	YHR184W	SSP1		1.16852	0.057	1.06228	0.026	0.10724	0.057	3e-05
hrq1	hrq1	YLR452C	SST2		0.64475	0.022	0.82139	0.051	-0.18343	0.022	0.00039	status=JK
hrq1	hrq1	YMR053C	STB2		1.09928	0.056	1.01199	0.015	0.08191	0.056	4e-05
hrq1	hrq1	YHR178W	STB5		0.57415	0.083	0.64753	0.047	-0.08381	0.083	0.00082
hrq1	hrq1	YMR054W	STV1		1.10381	0.117	0.98444	0.047	0.1304	0.117	0.00033
hrq1	hrq1	YMR039C	SUB1		0.94536	0.061	0.85562	0.058	0.08168	0.061	7e-05
hrq1	hrq1	YIL162W	SUC2		1.10428	0.041	1.01842	0.045	0.08153	0.041	1e-05
hrq1	hrq1	YNL066W	SUN4		1.22365	0.085	1.0931	0.045	0.13239	0.085	9e-05
hrq1	hrq1	YLR372W	SUR4		1.10467	0.038	0.96755	0.043	0.13791	0.038	1e-05
hrq1	hrq1	YML052W	SUR7		1.06268	0.074	0.96658	0.028	0.09665	0.074	9e-05
hrq1	hrq1	YPL163C	SVS1		1.10558	0.062	1.01995	0.007	0.08221	0.062	5e-05
hrq1	hrq1	YAR003W	SWD1		0.8279	0.045	0.92281	0.01	-0.094	0.045	4e-05
hrq1	hrq1	YDR126W	SWF1		0.90674	0.064	1.04758	0.037	-0.14687	0.064	9e-05
hrq1	hrq1	YER111C	SWI4		0.44159	0.029	0.94159	0.009	-0.50017	0.029	8e-05
hrq1	hrq1	YDR146C	SWI5		1.0785	0.094	0.99368	0.037	0.08154	0.094	0.00018
hrq1	hrq1	YNR004W	SWM2		1.02863	0.134	0.91656	0.096	0.1182	0.134	0.00564	status=JK
hrq1	hrq1	YFL049W	SWP82		0.92617	0.08	1.03459	0.002	-0.10747	0.08	0.00018
hrq1	hrq1	YNL081C	SWS2		0.96387	0.056	0.76554	0.017	0.19125	0.056	0.00113	status=JK
hrq1	hrq1	YOR179C	SYC1		0.68179	0.085	0.78543	0.016	-0.09836	0.085	0.00053
hrq1	hrq1	YCR060W	TAH1		1.07383	0.029	0.97748	0.017	0.09604	0.029	1e-05
hrq1	hrq1	YBR150C	TBS1		1.06833	0.054	1.00129	0.044	0.08216	0.054	4e-05
hrq1	hrq1	YPL180W	TCO89		0.43455	0.139	0.60634	0.051	-0.1605	0.139	0.00826
hrq1	hrq1	YLR426W	TDA5		1.08104	0.086	0.98574	0.018	0.09604	0.086	0.00014
hrq1	hrq1	YOR337W	TEA1		1.09945	0.02	0.99192	0.031	0.11203	0.02	0.00011	status=JK
hrq1	hrq1	YBR118W	TEF2		0.8631	0.07	0.98073	0.046	-0.12607	0.07	0.00015
hrq1	hrq1	YBL088C	TEL1		0.91677	0.025	0.99614	0.036	-0.09087	0.025	0.00024	status=JK
hrq1	hrq1	YNL128W	TEP1		0.92914	0.017	1.03838	0.001	-0.11052	0.017	0.00012	status=JK
hrq1	hrq1	YLR178C	TFS1		0.75065	0.288	1.00252	0.058	-0.25004	0.288	0.01371
hrq1	hrq1	YMR313C	TGL3		0.90519	0.081	1.02123	0.023	-0.11307	0.081	0.0002
hrq1	hrq1	YPL157W	TGS1		0.71288	0.044	0.81289	0.026	-0.09567	0.044	6e-05
hrq1	hrq1	YHR167W	THP2		0.89139	0.203	0.99859	0.033	-0.0979	0.203	0.00313
hrq1	hrq1	YPR045C	THP3		0.39098	0.041	0.63725	0.011	-0.24555	0.041	0.00373	status=JK
hrq1	hrq1	YJL138C	TIF2		0.92421	0.044	0.80224	0.003	0.12158	0.044	3e-05
hrq1	hrq1	YOR252W	TMA16		0.89843	0.022	1.01557	0.032	-0.11468	0.022	0
hrq1	hrq1	YMR269W	TMA23		0.49568	0.071	0.77965	0.037	-0.28529	0.071	0.0008
hrq1	hrq1	YDR107C	TMN2		0.94238	0.06	1.10802	0.033	-0.17366	0.06	7e-05
hrq1	hrq1	YER113C	TMN3		1.00953	0.126	1.0863	0.033	-0.08463	0.126	0.00053
hrq1	hrq1	YNL070W	TOM7		1.07326	0.039	0.9779	0.05	0.09042	0.039	1e-05
hrq1	hrq1	YNL121C	TOM70		0.56284	0.339	0.75921	0.23	-0.24306	0.339	0.04505
hrq1	hrq1	YBR162C	TOS1		1.1329	0.114	1.02989	0.043	0.10064	0.114	0.00028
hrq1	hrq1	YJL164C	TPK1		0.79751	0.2	0.9489	0.016	-0.15126	0.2	0.00414
hrq1	hrq1	YNL079C	TPM1		0.99254	0.019	0.90057	0.031	0.09196	0.019	0.00012	status=JK
hrq1	hrq1	YMR156C	TPP1		0.9056	0.039	1.04672	0.026	-0.14094	0.039	0.00061	status=JK
hrq1	hrq1	YBR126C	TPS1		0.93431	0.075	0.72409	0.053	0.22562	0.075	0.00014
hrq1	hrq1	YMR233W	TRI1		1.17859	0.059	1.02572	0.01	0.15269	0.059	3e-05
hrq1	hrq1	YDR120C	TRM1		0.97764	0.017	1.13338	0.045	-0.15256	0.017	0
hrq1	hrq1	YBR061C	TRM7		0.75436	0.107	0.85202	0.093	-0.11048	0.107	0.00078
hrq1	hrq1	YMR259C	TRM732		0.58279	0.043	1.0033	0.011	-0.4156	0.043	0.00011
hrq1	hrq1	YDR007W	TRP1		0.95022	0.031	1.03807	0.042	-0.08423	0.031	1e-05
hrq1	hrq1	YDR108W	TRS85		0.88262	0.036	0.97062	0.018	-0.09255	0.036	2e-05
hrq1	hrq1	YML028W	TSA1		0.73328	0.018	0.89855	0.01	-0.16689	0.018	0
hrq1	hrq1	YML124C	TUB3		1.17117	0.068	1.01846	0.025	0.16011	0.068	5e-05
hrq1	hrq1	YOR251C	TUM1		1.10218	0.012	1.02482	0.022	0.08122	0.012	4e-05	status=JK
hrq1	hrq1	YGL050W	TYW3		1.0978	0.019	1.02451	0.027	0.08034	0.019	0
hrq1	hrq1	YPR066W	UBA3		0.85621	0.037	0.71778	0.023	0.14211	0.037	2e-05
hrq1	hrq1	YDR092W	UBC13		1.14211	0.061	1.00713	0.037	0.13456	0.061	4e-05
hrq1	hrq1	YER151C	UBP3		0.74888	0.109	0.84421	0.024	-0.09128	0.109	0.00083
hrq1	hrq1	YFR010W	UBP6		0.97045	0.011	0.84818	0.014	0.12523	0.011	4e-05	status=JK
hrq1	hrq1	YBR165W	UBS1		0.74245	0.038	0.64048	0.066	0.09507	0.038	4e-05
hrq1	hrq1	YMR067C	UBX4		1.04669	0.025	0.9737	0.058	0.0807	0.025	0
hrq1	hrq1	YOR191W	ULS1		0.92283	0.147	1.00731	0.017	-0.08417	0.147	0.00109
hrq1	hrq1	YLR193C	UPS1		0.87717	0.063	0.76006	0.017	0.12122	0.063	0.0001
hrq1	hrq1	YML106W	URA5		0.72455	0.075	0.63	0.016	0.09185	0.075	0.0003
hrq1	hrq1	YBL039C	URA7		0.78534	0.054	0.89792	0.017	-0.12086	0.054	9e-05
hrq1	hrq1	YJR103W	URA8		0.9009	0.081	0.9966	0.017	-0.09716	0.08	0.00265	status=JK
hrq1	hrq1	YPL230W	USV1		1.08488	0.012	0.99788	0.017	0.09019	0.012	4e-05	status=JK
hrq1	hrq1	YOR106W	VAM3		0.87578	0.022	0.6536	0.085	0.20447	0.022	0.00021	status=JK
hrq1	hrq1	YDL077C	VAM6		0.19845	0.024	0.43141	0.238	-0.21733	0.024	0.00501	status=JK
hrq1	hrq1	YGL212W	VAM7		0.13018	0.041	0.56407	0.369	-0.34979	0.041	0.03178	status=JK
hrq1	hrq1	YMR088C	VBA1		0.16542	0.026	0.27953	0.242	-0.09844	0.026	0.00833	status=JK
hrq1	hrq1	YDR119W	VBA4		1.01379	0.057	1.0937	0.047	-0.08787	0.057	5e-05
hrq1	hrq1	YDL128W	VCX1		1.09268	0.08	0.9983	0.008	0.0926	0.08	0.00011
hrq1	hrq1	YER128W	VFA1		0.77263	0.235	0.84746	0.157	-0.10611	0.235	0.00717
hrq1	hrq1	YIL017C	VID28		1.03519	0.048	0.92969	0.015	0.1066	0.048	3e-05
hrq1	hrq1	YGL227W	VID30		0.86969	0.027	0.77823	0.041	0.08296	0.027	1e-05
hrq1	hrq1	YDL185W	VMA1		0.79198	0.119	1.03663	0.018	-0.24566	0.119	0.00091
hrq1	hrq1	YGR105W	VMA21		0.76574	0.025	0.68088	0.069	0.08983	0.025	0.00036	status=JK
hrq1	hrq1	YKL041W	VPS24		0.59233	0.145	0.71049	0.022	-0.12572	0.145	0.00386
hrq1	hrq1	YNR006W	VPS27		0.84072	0.188	0.69559	0.05	0.15328	0.188	0.00297
hrq1	hrq1	YPR173C	VPS4		0.66871	0.047	0.78627	0.061	-0.10534	0.047	0.0001
hrq1	hrq1	YKR020W	VPS51		0.8795	0.028	0.79399	0.005	0.08647	0.028	1e-05
hrq1	hrq1	YJR044C	VPS55		0.92539	0.014	1.01752	0.038	-0.0876	0.014	7e-05	status=JK
hrq1	hrq1	YML041C	VPS71		0.74578	0.191	0.95604	0.089	-0.20953	0.191	0.00437
hrq1	hrq1	YDL224C	WHI4		0.96712	0.077	0.73633	0.056	0.22973	0.077	0.00014
hrq1	hrq1	YOL105C	WSC3		1.09954	0.051	1.01365	0.019	0.08454	0.051	3e-05
hrq1	hrq1	YHR134W	WSS1		0.4432	0.073	0.92159	0.045	-0.47306	0.073	0.00122
hrq1	hrq1	YJR133W	XPT1		0.91793	0.016	1.00097	0.042	-0.09771	0.016	0.0001	status=JK
hrq1	hrq1	YAL066W	YAL066W		1.06512	0.036	0.97932	0.05	0.09152	0.036	1e-05
hrq1	hrq1	YPL239W	YAR1		0.83596	0.065	0.61912	0.043	0.21114	0.065	0.00013
hrq1	hrq1	YBL081W	YBL081W		1.08787	0.097	0.99396	0.04	0.08973	0.097	0.00019
hrq1	hrq1	YBR016W	YBR016W		0.70707	0.006	0.52521	0.044	0.18985	0.006	2e-05	status=JK
hrq1	hrq1	YBR032W	YBR032W		0.89915	0.011	0.98157	0.038	-0.08554	0.011	5e-05	status=JK
hrq1	hrq1	YBR064W	YBR064W		1.11811	0.012	1.0017	0.036	0.1131	0.012	4e-05	status=JK
hrq1	hrq1	YBR071W	YBR071W		1.111	0.074	0.99046	0.029	0.1138	0.074	8e-05
hrq1	hrq1	YBR099C	YBR099C		0.5544	0.066	1.00608	0.026	-0.45223	0.066	0.00046
hrq1	hrq1	YBR100W	YBR100W		0.4463	0.028	0.91943	0.006	-0.47102	0.028	7e-05
hrq1	hrq1	YBR134W	YBR134W		1.1323	0.031	1.04628	0.026	0.08566	0.031	1e-05
hrq1	hrq1	YBR137W	YBR137W		0.84724	0.054	0.98077	0.024	-0.13745	0.054	7e-05
hrq1	hrq1	YBR238C	YBR238C		0.93658	0.123	1.02591	0.023	-0.0967	0.122	0.00061
hrq1	hrq1	YBR300C	YBR300C		0.94672	0.018	1.03184	0.035	-0.08881	0.018	0.00012	status=JK
hrq1	hrq1	YNL154C	YCK2		1.06086	0.048	0.94899	0.032	0.10864	0.048	3e-05
hrq1	hrq1	YCL006C	YCL006C		1.07056	0.181	0.951	0.01	0.12159	0.18	0.00129
hrq1	hrq1	YCL022C	YCL022C		1.10413	0.083	1.00303	0.05	0.09293	0.083	0.00011
hrq1	hrq1	YCL023C	YCL023C		0.91696	0.105	1.01329	0.063	-0.10166	0.105	0.00041
hrq1	hrq1	YCL060C	YCL060C		0.71546	0.037	0.98143	0.057	-0.25042	0.037	4e-05
hrq1	hrq1	YNL064C	YDJ1		1.04454	0.046	0.8947	0.032	0.15832	0.046	2e-05
hrq1	hrq1	YDL062W	YDL062W		1.04335	0.033	0.94542	0.015	0.10107	0.033	1e-05
hrq1	hrq1	YDL071C	YDL071C		0.94848	0.053	1.08833	0.079	-0.15409	0.053	5e-05
hrq1	hrq1	YDL096C	YDL096C		0.88837	0.025	0.98453	0.007	-0.10041	0.025	0.00027	status=JK
hrq1	hrq1	YDL144C	YDL144C		1.0654	0.025	0.98585	0.029	0.08012	0.025	0
hrq1	hrq1	YDL176W	YDL176W		1.0764	0.004	0.9628	0.046	0.11215	0.004	1e-05	status=JK
hrq1	hrq1	YDL180W	YDL180W		0.94176	0.014	1.01866	0.081	-0.0929	0.014	7e-05	status=JK
hrq1	hrq1	YDL187C	YDL187C		1.10044	0.035	1.00088	0.053	0.11083	0.035	1e-05
hrq1	hrq1	YDL199C	YDL199C		1.02825	0.101	0.90976	0.017	0.11541	0.101	0.00026
hrq1	hrq1	YDL211C	YDL211C		1.14154	0.07	0.88465	0.007	0.25797	0.07	6e-05
hrq1	hrq1	YDL218W	YDL218W		0.97436	0.047	0.74797	0.062	0.21067	0.047	3e-05
hrq1	hrq1	YDL241W	YDL241W		0.96909	0.074	0.82021	0.049	0.14277	0.073	0.00012
hrq1	hrq1	YDL242W	YDL242W		1.12117	0.007	1.00032	0.008	0.12348	0.007	1e-05	status=JK
hrq1	hrq1	YDR008C	YDR008C		1.13069	0.019	0.8302	0.024	0.30235	0.019	9e-05	status=JK
hrq1	hrq1	YDR018C	YDR018C		0.89777	0.103	1.03494	0.007	-0.14129	0.103	0.00041
hrq1	hrq1	YDR024W	YDR024W		1.01018	0.098	0.90694	0.011	0.10345	0.098	0.00025
hrq1	hrq1	YDR089W	YDR089W		0.90833	0.119	1.06453	0.059	-0.14588	0.119	0.00061
hrq1	hrq1	YDR094W	YDR094W		0.92516	0.022	1.01242	0.029	-0.08364	0.022	0.00018	status=JK
hrq1	hrq1	YDR095C	YDR095C		0.9458	0.048	1.13795	0.022	-0.19094	0.048	4e-05
hrq1	hrq1	YDR112W	YDR112W		1.01867	0.062	1.1488	0.043	-0.14287	0.062	6e-05
hrq1	hrq1	YDR124W	YDR124W		1.07107	0.032	1.20441	0.043	-0.12645	0.032	1e-05
hrq1	hrq1	YDR149C	YDR149C		0.97732	0.015	0.86888	0.011	0.10326	0.015	8e-05	status=JK
hrq1	hrq1	YDR161W	YDR161W		0.74501	0.074	0.61661	0.037	0.13405	0.073	0.00323	status=JK
hrq1	hrq1	YDR186C	YDR186C		0.64282	0.334	1.0524	0.01	-0.41097	0.333	0.03086
hrq1	hrq1	YDR387C	YDR387C		0.94841	0.015	1.05931	0.012	-0.1125	0.015	8e-05	status=JK
hrq1	hrq1	YDR537C	YDR537C		0.96483	0.045	1.04958	0.028	-0.08062	0.045	0.00072	status=JK
hrq1	hrq1	YDR541C	YDR541C		1.04462	0.029	0.92521	0.032	0.11775	0.029	1e-05
hrq1	hrq1	YER079W	YER079W		0.99464	0.156	0.8943	0.026	0.1112	0.156	0.00105
hrq1	hrq1	YER119C-A	YER119C-A		0.77182	0.093	0.91069	0.032	-0.14448	0.093	0.00047
hrq1	hrq1	YER152C	YER152C		0.95431	0.098	1.05002	0.018	-0.09901	0.098	0.0003
hrq1	hrq1	YMR040W	YET2		1.14543	0.122	0.97898	0.008	0.16329	0.122	0.00033
hrq1	hrq1	YFR007W	YFH7		0.94956	0.115	1.03689	0.141	-0.10272	0.115	0.00048
hrq1	hrq1	YFL006W	YFL006W		0.90264	0.032	1.01256	0.015	-0.10855	0.032	1e-05
hrq1	hrq1	YFL012W	YFL012W		0.94612	0.029	1.05992	0.034	-0.11252	0.029	0.00031	status=JK
hrq1	hrq1	YFR006W	YFR006W		1.06512	0.076	0.98508	0.017	0.08073	0.075	0.0001
hrq1	hrq1	YGL007W	YGL007W		0.49513	0.279	0.83687	0.051	-0.33583	0.279	0.03809
hrq1	hrq1	YGL010W	YGL010W		0.85393	0.043	1.02717	0.083	-0.18213	0.043	0.00086	status=JK
hrq1	hrq1	YGL024W	YGL024W		0.62429	0.037	0.4151	0.026	0.20885	0.037	6e-05
hrq1	hrq1	YGL039W	YGL039W		1.12565	0.098	1.02299	0.023	0.1135	0.097	0.00018
hrq1	hrq1	YGL149W	YGL149W		0.99631	0.047	0.90546	0.031	0.09091	0.047	3e-05
hrq1	hrq1	YGL176C	YGL176C		1.12614	0.046	1.05202	0.051	0.08311	0.046	2e-05
hrq1	hrq1	YGL235W	YGL235W		0.89034	0.126	0.97686	0.004	-0.08603	0.126	0.00077
hrq1	hrq1	YGR012W	YGR012W		0.92853	0.022	1.02312	0.008	-0.09288	0.022	0
hrq1	hrq1	YGR026W	YGR026W		0.90309	0.132	0.99762	0.003	-0.09491	0.132	0.00085
hrq1	hrq1	YGR066C	YGR066C		1.12162	0.092	1.03055	0.028	0.09061	0.092	0.00015
hrq1	hrq1	YGR067C	YGR067C		0.99698	0.214	1.08734	0.059	-0.08538	0.214	0.00262
hrq1	hrq1	YGR069W	YGR069W		1.07672	0.026	0.97424	0.022	0.11406	0.026	0.0002	status=JK
hrq1	hrq1	YGR111W	YGR111W		0.93335	0.013	1.03961	0.026	-0.09922	0.013	6e-05	status=JK
hrq1	hrq1	YGR122W	YGR122W		1.09239	0.004	0.96749	0.041	0.11678	0.004	0	status=JK
hrq1	hrq1	YGR250C	YGR250C		0.8852	0.022	0.96815	0.049	-0.08652	0.022	0
hrq1	hrq1	YGR291C	YGR291C		1.11119	0.025	1.02645	0.003	0.08428	0.025	0
hrq1	hrq1	YHL005C	YHL005C		1.07124	0.043	0.98462	0.03	0.08422	0.043	2e-05
hrq1	hrq1	YHR049C-A	YHR049C-A		1.06643	0.08	0.98202	0.044	0.0801	0.08	0.00012
hrq1	hrq1	YIL067C	YIL067C		0.31161	0.096	0.42628	0.053	-0.11873	0.096	0.02998	status=JK
hrq1	hrq1	YIL077C	YIL077C		1.12138	0.17	1.00483	0.02	0.11962	0.17	0.00095
hrq1	hrq1	YIL141W	YIL141W		1.1474	0.035	1.05532	0.029	0.08716	0.035	1e-05
hrq1	hrq1	YIL161W	YIL161W		0.81793	0.009	1.01712	0.113	-0.18456	0.009	4e-05	status=JK
hrq1	hrq1	YIR035C	YIR035C		1.16554	0.064	1.03735	0.003	0.12643	0.064	5e-05
hrq1	hrq1	YJL171C	YJL171C		1.15412	0.05	1.03602	0.007	0.11822	0.05	2e-05
hrq1	hrq1	YJL175W	YJL175W		0.69035	0.029	0.87519	0.025	-0.18425	0.029	2e-05
hrq1	hrq1	YJR084W	YJR084W		0.35986	0.127	0.91763	0.114	-0.58267	0.127	0.039	status=JK
hrq1	hrq1	YJR087W	YJR087W		1.04971	0.015	0.86094	0.052	0.18276	0.015	6e-05	status=JK
hrq1	hrq1	YJR098C	YJR098C		0.9177	0.074	1.02418	0.029	-0.10882	0.074	0.00014
hrq1	hrq1	YJR120W	YJR120W		0.90365	0.054	0.64429	0.03	0.27171	0.054	0.00119	status=JK
hrq1	hrq1	YJR124C	YJR124C		0.89498	0.038	1.00833	0.036	-0.10968	0.038	2e-05
hrq1	hrq1	YKL027W	YKL027W		0.87945	0.098	0.96514	0.017	-0.08836	0.098	0.00037
hrq1	hrq1	YKL077W	YKL077W		0.99093	0.098	1.08179	0.014	-0.09602	0.098	0.00027
hrq1	hrq1	YKL115C	YKL115C		0.93913	0.133	1.0161	0.054	-0.08962	0.133	0.00077
hrq1	hrq1	YKL202W	YKL202W		1.10911	0.03	1.01129	0.027	0.09465	0.03	0.00024	status=JK
hrq1	hrq1	YLR179C	YLR179C		1.14161	0.033	1.05937	0.006	0.08453	0.033	1e-05
hrq1	hrq1	YLR184W	YLR184W		0.94587	0.041	0.88449	0.069	0.08189	0.041	2e-05
hrq1	hrq1	YLR211C	YLR211C		1.03178	0.023	0.94252	0.051	0.10444	0.023	0
hrq1	hrq1	YLR224W	YLR224W		1.1197	0.056	1.00339	0.004	0.11771	0.056	3e-05
hrq1	hrq1	YLR235C	YLR235C		1.06607	0.143	0.79289	0.021	0.27173	0.142	0.00065
hrq1	hrq1	YLR236C	YLR236C		1.08776	0.028	1.0021	0.002	0.08579	0.028	0.00022	status=JK
hrq1	hrq1	YLR338W	YLR338W		0.9697	0.043	0.80232	0.043	0.16415	0.043	2e-05
hrq1	hrq1	YML038C	YMD8		0.8416	0.037	0.76128	0.009	0.08168	0.036	2e-05
hrq1	hrq1	YPR024W	YME1		0.5107	0.042	0.79981	0.021	-0.29469	0.042	0.00228	status=JK
hrq1	hrq1	YML108W	YML108W		1.1035	0.043	0.99495	0.05	0.09984	0.043	2e-05
hrq1	hrq1	YMR010W	YMR010W		1.16587	0.024	1.02347	0.017	0.1476	0.024	0
hrq1	hrq1	YMR018W	YMR018W		1.1172	0.07	1.01534	0.028	0.09973	0.07	7e-05
hrq1	hrq1	YMR034C	YMR034C		1.13753	0.057	1.03928	0.003	0.09917	0.057	4e-05
hrq1	hrq1	YMR052C-A	YMR052C-A		1.10354	0.01	0.9791	0.024	0.12451	0.01	3e-05	status=JK
hrq1	hrq1	YMR075C-A	YMR075C-A		1.1471	0.127	0.97014	0.031	0.17464	0.127	0.00037
hrq1	hrq1	YMR085W	YMR085W		1.30416	0.089	1.04671	0.039	0.248	0.089	9e-05
hrq1	hrq1	YMR086C-A	YMR086C-A		1.22139	0.057	1.03598	0.08	0.16883	0.057	0.00073	status=JK
hrq1	hrq1	YMR087W	YMR087W		1.3269	0.009	0.98209	0.037	0.35205	0.009	1e-05	status=JK
hrq1	hrq1	YMR099C	YMR099C		1.16293	0.06	0.99786	0.009	0.16249	0.06	4e-05
hrq1	hrq1	YMR102C	YMR102C		1.39182	0.094	1.02493	0.027	0.36805	0.094	9e-05
hrq1	hrq1	YMR103C	YMR103C		1.16377	0.131	1.00149	0.015	0.16563	0.131	0.00039
hrq1	hrq1	YMR119W-A	YMR119W-A		1.12505	0.043	1.02317	0.014	0.10501	0.043	2e-05
hrq1	hrq1	YMR158C-A	YMR158C-A		0.94788	0.06	1.03179	0.063	-0.08255	0.06	7e-05
hrq1	hrq1	YMR158W-A	YMR158W-A		0.84035	0.12	1.04853	0.019	-0.20675	0.12	0.00079
hrq1	hrq1	YMR166C	YMR166C		0.80795	0.075	0.90307	0.025	-0.0975	0.075	0.00021
hrq1	hrq1	YMR172C-A	YMR172C-A		0.89768	0.022	1.00791	0.021	-0.10583	0.022	0.0002	status=JK
hrq1	hrq1	YMR173W-A	YMR173W-A		0.85729	0.01	1.01589	0.039	-0.16665	0.01	4e-05	status=JK
hrq1	hrq1	YMR178W	YMR178W		0.73404	0.058	1.05008	0.003	-0.31668	0.058	0.00014
hrq1	hrq1	YMR181C	YMR181C		0.71762	0.084	1.02582	0.042	-0.30482	0.084	0.00044
hrq1	hrq1	YMR187C	YMR187C		0.83384	0.047	1.00133	0.038	-0.17811	0.047	5e-05
hrq1	hrq1	YMR193C-A	YMR193C-A		0.47392	0.073	0.79879	0.056	-0.33299	0.073	0.00098
hrq1	hrq1	YMR194C-A	YMR194C-A		0.57183	0.023	1.01951	0.028	-0.44225	0.023	2e-05
hrq1	hrq1	YMR196W	YMR196W		0.85231	0.123	1.04701	0.018	-0.19933	0.123	0.00081
hrq1	hrq1	YMR206W	YMR206W		0.81018	0.024	1.01687	0.021	-0.20219	0.024	0.00029	status=JK
hrq1	hrq1	YMR209C	YMR209C		0.83327	0.052	1.00993	0.041	-0.17682	0.052	7e-05
hrq1	hrq1	YMR245W	YMR245W		0.54131	0.281	0.96248	0.09	-0.40694	0.281	0.03098
hrq1	hrq1	YMR253C	YMR253C		0.8387	0.039	1.04931	0.014	-0.20562	0.038	3e-05
hrq1	hrq1	YMR254C	YMR254C		0.78165	0.012	0.96716	0.051	-0.18329	0.012	8e-05	status=JK
hrq1	hrq1	YMR262W	YMR262W		0.82924	0.051	1.02841	0.014	-0.20161	0.051	7e-05
hrq1	hrq1	YMR265C	YMR265C		0.76224	0.085	1.05229	0.07	-0.28999	0.085	0.00038
hrq1	hrq1	YMR294W-A	YMR294W-A		0.77818	0.051	0.68975	0.05	0.0877	0.051	8e-05
hrq1	hrq1	YMR304C-A	YMR304C-A		1.07137	0.207	0.96407	0.011	0.10391	0.206	0.00191
hrq1	hrq1	YMR315W	YMR315W		0.9539	0.036	1.04025	0.006	-0.09016	0.036	1e-05
hrq1	hrq1	YMR316C-A	YMR316C-A		1.12681	0.041	1.0452	0.009	0.08494	0.041	0.00045	status=JK
hrq1	hrq1	YMR326C	YMR326C		1.13408	0.169	1.02895	0.024	0.09656	0.169	0.0009
hrq1	hrq1	YNL024C	YNL024C		1.09356	0.02	1.00233	0.009	0.08948	0.02	0.00012	status=JK
hrq1	hrq1	YNL034W	YNL034W		1.09969	0.05	0.98834	0.046	0.11511	0.05	0.00069	status=JK
hrq1	hrq1	YNL046W	YNL046W		0.21616	0.055	0.30828	0.089	-0.10838	0.055	0.02104	status=JK
hrq1	hrq1	YNL095C	YNL095C		1.10633	0.044	0.99805	0.051	0.12122	0.043	2e-05
hrq1	hrq1	YNL134C	YNL134C		0.90491	0.066	1.01725	0.023	-0.10855	0.066	0.00011
hrq1	hrq1	YNL140C	YNL140C		1.10842	0.014	1.00014	0.019	0.10464	0.014	5e-05	status=JK
hrq1	hrq1	YNL143C	YNL143C		0.92104	0.047	1.02221	0.012	-0.09947	0.047	4e-05
hrq1	hrq1	YNL144C	YNL144C		1.17281	0.063	1.04975	0.032	0.12804	0.063	4e-05
hrq1	hrq1	YNR005C	YNR005C		1.07841	0.019	0.92809	0.052	0.14217	0.019	0
hrq1	hrq1	YNR025C	YNR025C		1.02289	0.216	0.93723	0.044	0.08898	0.215	0.00248
hrq1	hrq1	YNR048W	YNR048W		0.98791	0.096	1.09493	0.009	-0.10404	0.096	0.00025
hrq1	hrq1	YOL035C	YOL035C		0.88459	0.049	0.97772	0.002	-0.0928	0.049	5e-05
hrq1	hrq1	YOR008C-A	YOR008C-A		1.05553	0.078	0.97626	0.016	0.08096	0.078	0.00011
hrq1	hrq1	YOR022C	YOR022C		1.04533	0.036	0.95629	0.041	0.08053	0.036	1e-05
hrq1	hrq1	YOR024W	YOR024W		0.8797	0.025	0.97853	0.028	-0.09809	0.025	1e-05
hrq1	hrq1	YOR093C	YOR093C		0.66797	0.037	0.8517	0.04	-0.17407	0.037	5e-05
hrq1	hrq1	YOR131C	YOR131C		1.10377	0.009	0.99639	0.035	0.1012	0.009	2e-05	status=JK
hrq1	hrq1	YOR309C	YOR309C		0.86101	0.02	0.9417	0.039	-0.08444	0.02	0.00017	status=JK
hrq1	hrq1	YOR314W	YOR314W		0.87057	0.061	1.02925	0.018	-0.16117	0.061	9e-05
hrq1	hrq1	YOR325W	YOR325W		0.94352	0.012	1.03104	0.025	-0.08874	0.012	6e-05	status=JK
hrq1	hrq1	YOR333C	YOR333C		1.09974	0.147	0.90192	0.021	0.2016	0.147	0.00065
hrq1	hrq1	YOR343C	YOR343C		0.86624	0.307	1.01229	0.014	-0.14387	0.307	0.01103
hrq1	hrq1	YOR365C	YOR365C		0.92251	0.023	1.0059	0.017	-0.08011	0.023	0.00021	status=JK
hrq1	hrq1	YDR057W	YOS9		1.00913	0.249	0.90096	0.181	0.12677	0.249	0.00393
hrq1	hrq1	YML027W	YOX1		1.10729	0.014	1.00682	0.007	0.1029	0.014	6e-05	status=JK
hrq1	hrq1	YMR104C	YPK2		1.14824	0.04	1.04476	0.023	0.09631	0.04	1e-05
hrq1	hrq1	YPL034W	YPL034W		0.96172	0.035	1.06324	0.025	-0.10375	0.035	1e-05
hrq1	hrq1	YPL041C	YPL041C		1.12195	0.005	1.0214	0.031	0.09952	0.005	1e-05	status=JK
hrq1	hrq1	YPL162C	YPL162C		0.92967	0.012	1.00939	0.048	-0.08777	0.012	5e-05	status=JK
hrq1	hrq1	YPL182C	YPL182C		0.99057	0.107	1.08591	0.021	-0.09217	0.107	0.00035
hrq1	hrq1	YPL245W	YPL245W		0.95804	0.046	1.09699	0.006	-0.13593	0.046	3e-05
hrq1	hrq1	YPL264C	YPL264C		0.9107	0.015	1.01062	0.05	-0.10644	0.015	9e-05	status=JK
hrq1	hrq1	YOL092W	YPQ1		1.0757	0.008	0.99301	0.02	0.08074	0.008	2e-05	status=JK
hrq1	hrq1	YPR084W	YPR084W		0.97396	0.047	1.05811	0.009	-0.08669	0.047	3e-05
hrq1	hrq1	YPR096C	YPR096C		1.06064	0.079	0.96485	0.003	0.09292	0.079	0.00011
hrq1	hrq1	YPR123C	YPR123C		0.81993	0.034	0.93222	0.037	-0.12093	0.034	0.00056	status=JK
hrq1	hrq1	YPR147C	YPR147C		1.10634	0.105	1.00608	0.008	0.10024	0.105	0.00023
hrq1	hrq1	YPR148C	YPR148C		0.97739	0.066	1.06075	0.016	-0.08865	0.066	8e-05
hrq1	hrq1	YPR153W	YPR153W		1.13337	0.01	1	0.014	0.1331	0.01	3e-05	status=JK
hrq1	hrq1	YNL093W	YPT53		0.87536	0.023	1.00285	0.01	-0.1302	0.023	0.00023	status=JK
hrq1	hrq1	YHR017W	YSC83		0.25263	0.091	0.58736	0.222	-0.35072	0.091	0.01158
hrq1	hrq1	YMR243C	ZRC1		0.91695	0.071	0.77666	0.022	0.13596	0.07	0.00197	status=JK
hrq1	hrq1	YGL255W	ZRT1		0.62841	0.131	0.93498	0.043	-0.30823	0.131	0.00242
